# Supplementary material
Source: publisher figshare collection journal article supplement (https://acs.figshare.com/ndownloader/files/12302657)
Supplement: Supplementary file 1 [file 12302657]

 
data_mo_BMS_OMe
# start Validation Reply Form
_vrf_PLAT414_mo_BMS_OMe
;
PROBLEM: Short Intra D-H..H-X H1 ..H8B .. 1.77 Ang.
RESPONSE: This is due to the proximity of the H-atoms bound to tert-butyl moiety.
;
_vrf_PLAT420_mo_BMS_OMe
;
PROBLEM: D-H Without Acceptor O1 --H1 . Please Check
RESPONSE: This is due to the shielding of the -OH proton by the tert-butyl group.
;
# end Validation Reply Form

 
_audit_creation_method            'SHELXL-2014/7'
_shelx_SHELXL_version_number      '2014/7'
_chemical_name_systematic         ?
_chemical_name_common             ?
_chemical_melting_point           ?
_chemical_formula_moiety          'C31 H36 O3' 
_chemical_formula_sum
 'C31 H36 O3' 
_chemical_formula_weight          456.60

loop_
 _atom_type_symbol
 _atom_type_description
 _atom_type_scat_dispersion_real
 _atom_type_scat_dispersion_imag
 _atom_type_scat_source
 'C'  'C'   0.0033   0.0016
 'International Tables Vol C Tables 4.2.6.8 and 6.1.1.4'
 'H'  'H'   0.0000   0.0000
 'International Tables Vol C Tables 4.2.6.8 and 6.1.1.4'
 'O'  'O'   0.0106   0.0060
 'International Tables Vol C Tables 4.2.6.8 and 6.1.1.4'
 
_space_group_crystal_system       triclinic
_space_group_IT_number            2
_space_group_name_H-M_alt         'P -1'
_space_group_name_Hall            '-P 1'
 
_shelx_space_group_comment
;
The symmetry employed for this shelxl refinement is uniquely defined
by the following loop, which should always be used as a source of
symmetry information in preference to the above space-group names.
They are only intended as comments.
;
 
loop_
 _space_group_symop_operation_xyz
 'x, y, z'
 '-x, -y, -z'
 
_cell_length_a                    10.0553(3)
_cell_length_b                    10.7561(4)
_cell_length_c                    13.7858(5)
_cell_angle_alpha                 86.3840(10)
_cell_angle_beta                  69.6050(10)
_cell_angle_gamma                 71.3680(10)
_cell_volume                      1322.34(8)
_cell_formula_units_Z             2
_cell_measurement_temperature     100(2)
_cell_measurement_reflns_used      9911
_cell_measurement_theta_min        2.62
_cell_measurement_theta_max       30.49
 
_exptl_crystal_description        'PLATE'
_exptl_crystal_colour             'COLOURLESS'
_exptl_crystal_density_meas       ?
_exptl_crystal_density_method     ?
_exptl_crystal_density_diffrn     1.147          
_exptl_crystal_F_000              492
_exptl_transmission_factor_min    ?
_exptl_transmission_factor_max    ?
_exptl_crystal_size_max           0.180
_exptl_crystal_size_mid           0.090
_exptl_crystal_size_min           0.050
_exptl_absorpt_coefficient_mu     0.072
_shelx_estimated_absorpt_T_min    0.987
_shelx_estimated_absorpt_T_max    0.996
_exptl_absorpt_correction_type    'MULTI-SCAN'
_exptl_absorpt_correction_T_min   0.987
_exptl_absorpt_correction_T_max   0.996
_exptl_absorpt_process_details    'SADABS (BRUKER, 2016)'
_exptl_absorpt_special_details    ?
_diffrn_ambient_temperature       100(2)
_diffrn_radiation_wavelength      0.71073
_diffrn_radiation_type            MoK\a
_diffrn_source                    'micro-focus sealed tube'
_diffrn_radiation_monochromator   'multilayer mirrors'
_diffrn_source_type               'Incoatech I\mS HB'
_diffrn_measurement_device        '\k-geometry diffractometer'
_diffrn_measurement_device_type   'Bruker D8 VENTURE Kappa Duo PHOTON II CPAD'
_diffrn_measurement_method        '\f and \w scans'
_diffrn_detector                  'Photon II CPAD Area Detector'
_diffrn_detector_area_resol_mean  7.39
_diffrn_reflns_number             42514
_diffrn_reflns_av_unetI/netI      0.0256
_diffrn_reflns_av_R_equivalents   0.0276
_diffrn_reflns_limit_h_min        -13
_diffrn_reflns_limit_h_max        14
_diffrn_reflns_limit_k_min        -15
_diffrn_reflns_limit_k_max        15
_diffrn_reflns_limit_l_min        -19
_diffrn_reflns_limit_l_max        19
_diffrn_reflns_theta_min          2.615
_diffrn_reflns_theta_max          30.509
_diffrn_reflns_theta_full         25.242
_diffrn_measured_fraction_theta_max   0.997
_diffrn_measured_fraction_theta_full  0.996
_diffrn_reflns_Laue_measured_fraction_max    0.997
_diffrn_reflns_Laue_measured_fraction_full   0.996
_diffrn_reflns_point_group_measured_fraction_max   0.997
_diffrn_reflns_point_group_measured_fraction_full  0.996
_reflns_number_total              8052
_reflns_number_gt                 7218
_reflns_threshold_expression      'I > 2\s(I)'
_reflns_Friedel_coverage          0.000
_reflns_Friedel_fraction_max      .
_reflns_Friedel_fraction_full     .
 
_reflns_special_details
;
 Reflections were merged by SHELXL according to the crystal
 class for the calculation of statistics and refinement.
 
 _reflns_Friedel_fraction is defined as the number of unique
 Friedel pairs measured divided by the number that would be
 possible theoretically, ignoring centric projections and
 systematic absences.
;
 
_computing_data_collection       'APEX3 (Bruker, 2016)'
_computing_cell_refinement       'SAINT (Bruker, 2016)'
_computing_data_reduction        'SAINT (Bruker, 2016)'
_computing_structure_solution    'SHELXS-97 (Sheldrick 2008)'
_computing_structure_refinement  'SHELXL-2014/7 (Sheldrick, 2014)'
_computing_molecular_graphics    'Bruker SHELXTL'
_computing_publication_material  'Bruker SHELXTL'
_refine_special_details           ?
_refine_ls_structure_factor_coef  Fsqd
_refine_ls_matrix_type            full
_refine_ls_weighting_scheme       calc
_refine_ls_weighting_details
'w=1/[\s^2^(Fo^2^)+(0.0468P)^2^+0.4645P] where P=(Fo^2^+2Fc^2^)/3'
_atom_sites_solution_primary      ?
_atom_sites_solution_secondary    ?
_atom_sites_solution_hydrogens    geom
_refine_ls_hydrogen_treatment     constr
_refine_ls_extinction_method      none
_refine_ls_extinction_coef        .
_refine_ls_number_reflns          8052
_refine_ls_number_parameters      315
_refine_ls_number_restraints      0
_refine_ls_R_factor_all           0.0458
_refine_ls_R_factor_gt            0.0411
_refine_ls_wR_factor_ref          0.1063
_refine_ls_wR_factor_gt           0.1030
_refine_ls_goodness_of_fit_ref    1.026
_refine_ls_restrained_S_all       1.026
_refine_ls_shift/su_max           0.001
_refine_ls_shift/su_mean          0.000
 
loop_
 _atom_site_label
 _atom_site_type_symbol
 _atom_site_fract_x
 _atom_site_fract_y
 _atom_site_fract_z
 _atom_site_U_iso_or_equiv
 _atom_site_adp_type
 _atom_site_occupancy
 _atom_site_site_symmetry_order  
 _atom_site_calc_flag
 _atom_site_refinement_flags_posn
 _atom_site_refinement_flags_adp
 _atom_site_refinement_flags_occupancy
 _atom_site_disorder_assembly
 _atom_site_disorder_group
O1 O 1.01089(8) 0.24843(6) 0.13561(5) 0.02325(14) Uani 1 1 d . . . . .
H1 H 1.0909 0.2391 0.0854 0.035 Uiso 1 1 calc R U . . .
O2 O 0.70614(8) 0.89677(8) 0.17347(6) 0.02595(15) Uani 1 1 d . . . . .
O3 O 0.09316(8) 0.85232(7) 0.17743(5) 0.02259(14) Uani 1 1 d . . . . .
C1 C 0.85355(9) 0.62064(8) 0.28124(6) 0.01328(14) Uani 1 1 d . . . . .
C2 C 0.76412(9) 0.53980(8) 0.30289(6) 0.01497(15) Uani 1 1 d . . . . .
H2 H 0.6652 0.5710 0.3516 0.018 Uiso 1 1 calc R U . . .
C3 C 0.81491(9) 0.41395(8) 0.25535(6) 0.01474(15) Uani 1 1 d . . . . .
C4 C 0.96239(9) 0.37184(8) 0.18378(6) 0.01490(15) Uani 1 1 d . . . . .
C5 C 1.05777(9) 0.44949(8) 0.16087(6) 0.01383(14) Uani 1 1 d . . . . .
C6 C 0.99879(9) 0.57405(8) 0.21099(6) 0.01400(14) Uani 1 1 d . . . . .
H6 H 1.0602 0.6290 0.1966 0.017 Uiso 1 1 calc R U . . .
C7 C 1.21887(9) 0.40394(8) 0.08220(7) 0.01737(15) Uani 1 1 d . . . . .
C8 C 1.22002(11) 0.38118(11) -0.02737(7) 0.0278(2) Uani 1 1 d . . . . .
H8A H 1.1551 0.4605 -0.0466 0.042 Uiso 1 1 calc R U . . .
H8B H 1.1833 0.3073 -0.0282 0.042 Uiso 1 1 calc R U . . .
H8C H 1.3224 0.3613 -0.0770 0.042 Uiso 1 1 calc R U . . .
C9 C 1.31671(11) 0.27899(10) 0.11557(8) 0.0270(2) Uani 1 1 d . . . . .
H9A H 1.4176 0.2515 0.0634 0.041 Uiso 1 1 calc R U . . .
H9B H 1.2724 0.2086 0.1221 0.041 Uiso 1 1 calc R U . . .
H9C H 1.3224 0.2975 0.1825 0.041 Uiso 1 1 calc R U . . .
C10 C 1.29576(11) 0.50813(11) 0.07384(10) 0.0334(2) Uani 1 1 d . . . . .
H10A H 1.2393 0.5895 0.0509 0.050 Uiso 1 1 calc R U . . .
H10B H 1.3978 0.4764 0.0236 0.050 Uiso 1 1 calc R U . . .
H10C H 1.2994 0.5252 0.1417 0.050 Uiso 1 1 calc R U . . .
C11 C 0.71223(10) 0.32758(8) 0.27927(7) 0.01796(16) Uani 1 1 d . . . . .
C12 C 0.55789(11) 0.39539(10) 0.36012(8) 0.0272(2) Uani 1 1 d . . . . .
H12A H 0.4956 0.3380 0.3726 0.041 Uiso 1 1 calc R U . . .
H12B H 0.5098 0.4784 0.3344 0.041 Uiso 1 1 calc R U . . .
H12C H 0.5697 0.4130 0.4250 0.041 Uiso 1 1 calc R U . . .
C13 C 0.68548(12) 0.29933(11) 0.18067(8) 0.0274(2) Uani 1 1 d . . . . .
H13A H 0.6232 0.2416 0.1963 0.041 Uiso 1 1 calc R U . . .
H13B H 0.7818 0.2562 0.1267 0.041 Uiso 1 1 calc R U . . .
H13C H 0.6344 0.3821 0.1563 0.041 Uiso 1 1 calc R U . . .
C14 C 0.78070(11) 0.19750(9) 0.32348(8) 0.02529(19) Uani 1 1 d . . . . .
H14A H 0.7913 0.2161 0.3886 0.038 Uiso 1 1 calc R U . . .
H14B H 0.8793 0.1505 0.2736 0.038 Uiso 1 1 calc R U . . .
H14C H 0.7151 0.1431 0.3364 0.038 Uiso 1 1 calc R U . . .
C15 C 0.79992(9) 0.75775(8) 0.33239(6) 0.01363(14) Uani 1 1 d . . . . .
H15 H 0.8594 0.8083 0.2825 0.016 Uiso 1 1 calc R U . . .
C16 C 0.83244(9) 0.76001(8) 0.43196(6) 0.01497(15) Uani 1 1 d . . . . .
C17 C 0.83826(12) 0.65600(9) 0.49743(7) 0.02296(18) Uani 1 1 d . . . . .
H17 H 0.8226 0.5790 0.4799 0.028 Uiso 1 1 calc R U . . .
C18 C 0.86684(13) 0.66380(10) 0.58854(8) 0.0286(2) Uani 1 1 d . . . . .
H18 H 0.8712 0.5919 0.6324 0.034 Uiso 1 1 calc R U . . .
C19 C 0.88887(12) 0.77572(10) 0.61545(8) 0.02604(19) Uani 1 1 d . . . . .
H19 H 0.9074 0.7811 0.6779 0.031 Uiso 1 1 calc R U . . .
C20 C 0.88374(11) 0.87998(10) 0.55059(7) 0.02360(18) Uani 1 1 d . . . . .
H20 H 0.8988 0.9570 0.5686 0.028 Uiso 1 1 calc R U . . .
C21 C 0.85663(10) 0.87173(9) 0.45931(7) 0.01923(16) Uani 1 1 d . . . . .
H21 H 0.8545 0.9430 0.4149 0.023 Uiso 1 1 calc R U . . .
C22 C 0.63726(9) 0.82851(8) 0.34464(6) 0.01517(15) Uani 1 1 d . . . . .
C23 C 0.52600(10) 0.86791(9) 0.43525(7) 0.02024(17) Uani 1 1 d . . . . .
H23A H 0.4289 0.9194 0.4368 0.024 Uiso 1 1 calc R U . . .
H23B H 0.5439 0.8444 0.4982 0.024 Uiso 1 1 calc R U . . .
C24 C 0.61123(9) 0.86456(8) 0.24428(7) 0.01690(15) Uani 1 1 d . . . . .
C25 C 0.47174(9) 0.86234(8) 0.23026(6) 0.01570(15) Uani 1 1 d . . . . .
C26 C 0.37995(10) 0.79167(8) 0.29138(7) 0.01811(16) Uani 1 1 d . . . . .
H26 H 0.4040 0.7445 0.3469 0.022 Uiso 1 1 calc R U . . .
C27 C 0.25453(10) 0.78994(9) 0.27168(7) 0.02031(17) Uani 1 1 d . . . . .
H27 H 0.1929 0.7419 0.3136 0.024 Uiso 1 1 calc R U . . .
C28 C 0.21888(9) 0.85891(8) 0.19003(7) 0.01729(16) Uani 1 1 d . . . . .
C29 C 0.31004(10) 0.92820(9) 0.12738(7) 0.01850(16) Uani 1 1 d . . . . .
H29 H 0.2868 0.9742 0.0712 0.022 Uiso 1 1 calc R U . . .
C30 C 0.43515(10) 0.92904(9) 0.14831(7) 0.01875(16) Uani 1 1 d . . . . .
H30 H 0.4974 0.9762 0.1058 0.022 Uiso 1 1 calc R U . . .
C31 C 0.05433(11) 0.91656(10) 0.09243(7) 0.02220(17) Uani 1 1 d . . . . .
H31A H 0.0365 1.0110 0.1003 0.033 Uiso 1 1 calc R U . . .
H31B H -0.0366 0.9020 0.0915 0.033 Uiso 1 1 calc R U . . .
H31C H 0.1365 0.8807 0.0273 0.033 Uiso 1 1 calc R U . . .
 
loop_
 _atom_site_aniso_label
 _atom_site_aniso_U_11
 _atom_site_aniso_U_22
 _atom_site_aniso_U_33
 _atom_site_aniso_U_23
 _atom_site_aniso_U_13
 _atom_site_aniso_U_12
O1 0.0203(3) 0.0165(3) 0.0269(3) -0.0086(2) 0.0018(3) -0.0070(2)
O2 0.0193(3) 0.0362(4) 0.0262(3) 0.0136(3) -0.0103(3) -0.0134(3)
O3 0.0230(3) 0.0259(3) 0.0282(3) 0.0080(3) -0.0150(3) -0.0145(3)
C1 0.0142(3) 0.0124(3) 0.0132(3) 0.0006(3) -0.0051(3) -0.0038(3)
C2 0.0143(3) 0.0142(3) 0.0145(3) 0.0002(3) -0.0026(3) -0.0045(3)
C3 0.0152(3) 0.0138(3) 0.0147(3) 0.0010(3) -0.0036(3) -0.0058(3)
C4 0.0153(3) 0.0130(3) 0.0150(3) -0.0016(3) -0.0038(3) -0.0038(3)
C5 0.0125(3) 0.0151(3) 0.0131(3) 0.0007(3) -0.0040(3) -0.0039(3)
C6 0.0140(3) 0.0142(3) 0.0149(3) 0.0014(3) -0.0057(3) -0.0053(3)
C7 0.0124(3) 0.0185(4) 0.0179(4) -0.0011(3) -0.0022(3) -0.0037(3)
C8 0.0210(4) 0.0388(5) 0.0164(4) -0.0010(4) -0.0011(3) -0.0056(4)
C9 0.0169(4) 0.0278(5) 0.0287(5) 0.0006(4) -0.0061(4) 0.0013(3)
C10 0.0173(4) 0.0304(5) 0.0439(6) -0.0086(4) 0.0052(4) -0.0120(4)
C11 0.0175(4) 0.0156(4) 0.0200(4) 0.0004(3) -0.0027(3) -0.0083(3)
C12 0.0200(4) 0.0214(4) 0.0340(5) -0.0018(4) 0.0025(4) -0.0110(3)
C13 0.0283(5) 0.0321(5) 0.0289(5) -0.0001(4) -0.0105(4) -0.0179(4)
C14 0.0269(5) 0.0179(4) 0.0295(5) 0.0051(3) -0.0057(4) -0.0102(3)
C15 0.0144(3) 0.0119(3) 0.0147(3) 0.0001(3) -0.0052(3) -0.0039(3)
C16 0.0148(3) 0.0141(3) 0.0151(3) -0.0001(3) -0.0053(3) -0.0032(3)
C17 0.0343(5) 0.0175(4) 0.0193(4) 0.0030(3) -0.0117(4) -0.0091(4)
C18 0.0422(6) 0.0249(5) 0.0208(4) 0.0062(3) -0.0157(4) -0.0091(4)
C19 0.0290(5) 0.0318(5) 0.0198(4) 0.0005(4) -0.0129(4) -0.0078(4)
C20 0.0271(4) 0.0246(4) 0.0239(4) -0.0021(3) -0.0124(4) -0.0099(4)
C21 0.0227(4) 0.0167(4) 0.0208(4) 0.0012(3) -0.0099(3) -0.0071(3)
C22 0.0159(3) 0.0122(3) 0.0180(4) -0.0002(3) -0.0066(3) -0.0043(3)
C23 0.0172(4) 0.0210(4) 0.0210(4) -0.0036(3) -0.0056(3) -0.0043(3)
C24 0.0155(4) 0.0145(3) 0.0207(4) 0.0022(3) -0.0074(3) -0.0038(3)
C25 0.0144(3) 0.0140(3) 0.0181(4) 0.0008(3) -0.0057(3) -0.0036(3)
C26 0.0205(4) 0.0165(4) 0.0197(4) 0.0035(3) -0.0089(3) -0.0075(3)
C27 0.0228(4) 0.0203(4) 0.0227(4) 0.0058(3) -0.0099(3) -0.0120(3)
C28 0.0165(4) 0.0158(4) 0.0217(4) -0.0002(3) -0.0079(3) -0.0062(3)
C29 0.0165(4) 0.0191(4) 0.0207(4) 0.0047(3) -0.0080(3) -0.0058(3)
C30 0.0153(4) 0.0197(4) 0.0213(4) 0.0056(3) -0.0064(3) -0.0065(3)
C31 0.0226(4) 0.0251(4) 0.0241(4) 0.0025(3) -0.0128(3) -0.0093(3)
 
_geom_special_details
;
 All esds (except the esd in the dihedral angle between two l.s. planes)
 are estimated using the full covariance matrix.  The cell esds are taken
 into account individually in the estimation of esds in distances, angles
 and torsion angles; correlations between esds in cell parameters are only
 used when they are defined by crystal symmetry.  An approximate (isotropic)
 treatment of cell esds is used for estimating esds involving l.s. planes.
;
 
loop_
 _geom_bond_atom_site_label_1
 _geom_bond_atom_site_label_2
 _geom_bond_distance
 _geom_bond_site_symmetry_2
 _geom_bond_publ_flag
O1 C4 1.3830(10) . ?
O1 H1 0.8400 . ?
O2 C24 1.2260(11) . ?
O3 C28 1.3583(10) . ?
O3 C31 1.4309(11) . ?
C1 C6 1.3891(11) . ?
C1 C2 1.3905(11) . ?
C1 C15 1.5235(11) . ?
C2 C3 1.3999(11) . ?
C2 H2 0.9500 . ?
C3 C4 1.4090(11) . ?
C3 C11 1.5410(11) . ?
C4 C5 1.4087(11) . ?
C5 C6 1.3956(11) . ?
C5 C7 1.5413(11) . ?
C6 H6 0.9500 . ?
C7 C10 1.5304(13) . ?
C7 C8 1.5409(13) . ?
C7 C9 1.5423(13) . ?
C8 H8A 0.9800 . ?
C8 H8B 0.9800 . ?
C8 H8C 0.9800 . ?
C9 H9A 0.9800 . ?
C9 H9B 0.9800 . ?
C9 H9C 0.9800 . ?
C10 H10A 0.9800 . ?
C10 H10B 0.9800 . ?
C10 H10C 0.9800 . ?
C11 C12 1.5351(13) . ?
C11 C13 1.5400(13) . ?
C11 C14 1.5403(13) . ?
C12 H12A 0.9800 . ?
C12 H12B 0.9800 . ?
C12 H12C 0.9800 . ?
C13 H13A 0.9800 . ?
C13 H13B 0.9800 . ?
C13 H13C 0.9800 . ?
C14 H14A 0.9800 . ?
C14 H14B 0.9800 . ?
C14 H14C 0.9800 . ?
C15 C22 1.5203(11) . ?
C15 C16 1.5211(11) . ?
C15 H15 1.0000 . ?
C16 C17 1.3919(12) . ?
C16 C21 1.3976(11) . ?
C17 C18 1.3955(13) . ?
C17 H17 0.9500 . ?
C18 C19 1.3856(15) . ?
C18 H18 0.9500 . ?
C19 C20 1.3887(14) . ?
C19 H19 0.9500 . ?
C20 C21 1.3907(12) . ?
C20 H20 0.9500 . ?
C21 H21 0.9500 . ?
C22 C23 1.3348(12) . ?
C22 C24 1.5010(12) . ?
C23 H23A 0.9500 . ?
C23 H23B 0.9500 . ?
C24 C25 1.4886(11) . ?
C25 C30 1.3947(12) . ?
C25 C26 1.4019(11) . ?
C26 C27 1.3852(12) . ?
C26 H26 0.9500 . ?
C27 C28 1.3971(12) . ?
C27 H27 0.9500 . ?
C28 C29 1.3947(12) . ?
C29 C30 1.3879(12) . ?
C29 H29 0.9500 . ?
C30 H30 0.9500 . ?
C31 H31A 0.9800 . ?
C31 H31B 0.9800 . ?
C31 H31C 0.9800 . ?
 
loop_
 _geom_angle_atom_site_label_1
 _geom_angle_atom_site_label_2
 _geom_angle_atom_site_label_3
 _geom_angle
 _geom_angle_site_symmetry_1
 _geom_angle_site_symmetry_3
 _geom_angle_publ_flag
C4 O1 H1 109.5 . . ?
C28 O3 C31 118.10(7) . . ?
C6 C1 C2 118.76(7) . . ?
C6 C1 C15 118.40(7) . . ?
C2 C1 C15 122.84(7) . . ?
C1 C2 C3 122.23(7) . . ?
C1 C2 H2 118.9 . . ?
C3 C2 H2 118.9 . . ?
C2 C3 C4 116.84(7) . . ?
C2 C3 C11 121.08(7) . . ?
C4 C3 C11 122.07(7) . . ?
O1 C4 C5 120.61(7) . . ?
O1 C4 C3 116.54(7) . . ?
C5 C4 C3 122.85(7) . . ?
C6 C5 C4 116.92(7) . . ?
C6 C5 C7 120.11(7) . . ?
C4 C5 C7 122.95(7) . . ?
C1 C6 C5 122.39(7) . . ?
C1 C6 H6 118.8 . . ?
C5 C6 H6 118.8 . . ?
C10 C7 C8 106.25(8) . . ?
C10 C7 C5 111.31(7) . . ?
C8 C7 C5 111.09(7) . . ?
C10 C7 C9 106.02(8) . . ?
C8 C7 C9 110.48(8) . . ?
C5 C7 C9 111.45(7) . . ?
C7 C8 H8A 109.5 . . ?
C7 C8 H8B 109.5 . . ?
H8A C8 H8B 109.5 . . ?
C7 C8 H8C 109.5 . . ?
H8A C8 H8C 109.5 . . ?
H8B C8 H8C 109.5 . . ?
C7 C9 H9A 109.5 . . ?
C7 C9 H9B 109.5 . . ?
H9A C9 H9B 109.5 . . ?
C7 C9 H9C 109.5 . . ?
H9A C9 H9C 109.5 . . ?
H9B C9 H9C 109.5 . . ?
C7 C10 H10A 109.5 . . ?
C7 C10 H10B 109.5 . . ?
H10A C10 H10B 109.5 . . ?
C7 C10 H10C 109.5 . . ?
H10A C10 H10C 109.5 . . ?
H10B C10 H10C 109.5 . . ?
C12 C11 C13 106.83(8) . . ?
C12 C11 C14 106.92(7) . . ?
C13 C11 C14 109.97(8) . . ?
C12 C11 C3 111.91(7) . . ?
C13 C11 C3 110.30(7) . . ?
C14 C11 C3 110.78(7) . . ?
C11 C12 H12A 109.5 . . ?
C11 C12 H12B 109.5 . . ?
H12A C12 H12B 109.5 . . ?
C11 C12 H12C 109.5 . . ?
H12A C12 H12C 109.5 . . ?
H12B C12 H12C 109.5 . . ?
C11 C13 H13A 109.5 . . ?
C11 C13 H13B 109.5 . . ?
H13A C13 H13B 109.5 . . ?
C11 C13 H13C 109.5 . . ?
H13A C13 H13C 109.5 . . ?
H13B C13 H13C 109.5 . . ?
C11 C14 H14A 109.5 . . ?
C11 C14 H14B 109.5 . . ?
H14A C14 H14B 109.5 . . ?
C11 C14 H14C 109.5 . . ?
H14A C14 H14C 109.5 . . ?
H14B C14 H14C 109.5 . . ?
C22 C15 C16 113.30(7) . . ?
C22 C15 C1 111.20(6) . . ?
C16 C15 C1 113.62(6) . . ?
C22 C15 H15 106.0 . . ?
C16 C15 H15 106.0 . . ?
C1 C15 H15 106.0 . . ?
C17 C16 C21 118.50(8) . . ?
C17 C16 C15 122.89(7) . . ?
C21 C16 C15 118.60(7) . . ?
C16 C17 C18 120.55(9) . . ?
C16 C17 H17 119.7 . . ?
C18 C17 H17 119.7 . . ?
C19 C18 C17 120.41(9) . . ?
C19 C18 H18 119.8 . . ?
C17 C18 H18 119.8 . . ?
C18 C19 C20 119.54(9) . . ?
C18 C19 H19 120.2 . . ?
C20 C19 H19 120.2 . . ?
C19 C20 C21 120.05(9) . . ?
C19 C20 H20 120.0 . . ?
C21 C20 H20 120.0 . . ?
C20 C21 C16 120.93(8) . . ?
C20 C21 H21 119.5 . . ?
C16 C21 H21 119.5 . . ?
C23 C22 C24 120.81(8) . . ?
C23 C22 C15 124.75(8) . . ?
C24 C22 C15 114.17(7) . . ?
C22 C23 H23A 120.0 . . ?
C22 C23 H23B 120.0 . . ?
H23A C23 H23B 120.0 . . ?
O2 C24 C25 119.93(8) . . ?
O2 C24 C22 119.25(8) . . ?
C25 C24 C22 120.82(7) . . ?
C30 C25 C26 118.47(8) . . ?
C30 C25 C24 117.81(7) . . ?
C26 C25 C24 123.63(7) . . ?
C27 C26 C25 120.65(8) . . ?
C27 C26 H26 119.7 . . ?
C25 C26 H26 119.7 . . ?
C26 C27 C28 119.89(8) . . ?
C26 C27 H27 120.1 . . ?
C28 C27 H27 120.1 . . ?
O3 C28 C29 124.12(8) . . ?
O3 C28 C27 115.57(8) . . ?
C29 C28 C27 120.31(8) . . ?
C30 C29 C28 119.04(8) . . ?
C30 C29 H29 120.5 . . ?
C28 C29 H29 120.5 . . ?
C29 C30 C25 121.62(8) . . ?
C29 C30 H30 119.2 . . ?
C25 C30 H30 119.2 . . ?
O3 C31 H31A 109.5 . . ?
O3 C31 H31B 109.5 . . ?
H31A C31 H31B 109.5 . . ?
O3 C31 H31C 109.5 . . ?
H31A C31 H31C 109.5 . . ?
H31B C31 H31C 109.5 . . ?
 
loop_
 _geom_torsion_atom_site_label_1
 _geom_torsion_atom_site_label_2
 _geom_torsion_atom_site_label_3
 _geom_torsion_atom_site_label_4
 _geom_torsion
 _geom_torsion_site_symmetry_1
 _geom_torsion_site_symmetry_2
 _geom_torsion_site_symmetry_3
 _geom_torsion_site_symmetry_4
 _geom_torsion_publ_flag
C6 C1 C2 C3 -0.82(12) . . . . ?
C15 C1 C2 C3 -179.95(7) . . . . ?
C1 C2 C3 C4 0.07(12) . . . . ?
C1 C2 C3 C11 -178.79(7) . . . . ?
C2 C3 C4 O1 -178.80(7) . . . . ?
C11 C3 C4 O1 0.06(12) . . . . ?
C2 C3 C4 C5 1.08(12) . . . . ?
C11 C3 C4 C5 179.93(8) . . . . ?
O1 C4 C5 C6 178.46(7) . . . . ?
C3 C4 C5 C6 -1.41(12) . . . . ?
O1 C4 C5 C7 0.20(12) . . . . ?
C3 C4 C5 C7 -179.68(8) . . . . ?
C2 C1 C6 C5 0.46(12) . . . . ?
C15 C1 C6 C5 179.63(7) . . . . ?
C4 C5 C6 C1 0.61(12) . . . . ?
C7 C5 C6 C1 178.93(7) . . . . ?
C6 C5 C7 C10 2.13(11) . . . . ?
C4 C5 C7 C10 -179.66(9) . . . . ?
C6 C5 C7 C8 -116.06(9) . . . . ?
C4 C5 C7 C8 62.15(11) . . . . ?
C6 C5 C7 C9 120.27(9) . . . . ?
C4 C5 C7 C9 -61.52(11) . . . . ?
C2 C3 C11 C12 -1.51(12) . . . . ?
C4 C3 C11 C12 179.69(8) . . . . ?
C2 C3 C11 C13 117.28(9) . . . . ?
C4 C3 C11 C13 -61.53(11) . . . . ?
C2 C3 C11 C14 -120.73(9) . . . . ?
C4 C3 C11 C14 60.47(10) . . . . ?
C6 C1 C15 C22 142.14(7) . . . . ?
C2 C1 C15 C22 -38.73(10) . . . . ?
C6 C1 C15 C16 -88.62(9) . . . . ?
C2 C1 C15 C16 90.52(9) . . . . ?
C22 C15 C16 C17 97.78(10) . . . . ?
C1 C15 C16 C17 -30.40(11) . . . . ?
C22 C15 C16 C21 -81.81(9) . . . . ?
C1 C15 C16 C21 150.02(8) . . . . ?
C21 C16 C17 C18 0.34(14) . . . . ?
C15 C16 C17 C18 -179.25(9) . . . . ?
C16 C17 C18 C19 0.43(16) . . . . ?
C17 C18 C19 C20 -0.60(16) . . . . ?
C18 C19 C20 C21 0.00(16) . . . . ?
C19 C20 C21 C16 0.78(15) . . . . ?
C17 C16 C21 C20 -0.94(13) . . . . ?
C15 C16 C21 C20 178.66(8) . . . . ?
C16 C15 C22 C23 -12.08(11) . . . . ?
C1 C15 C22 C23 117.33(9) . . . . ?
C16 C15 C22 C24 161.90(7) . . . . ?
C1 C15 C22 C24 -68.68(9) . . . . ?
C23 C22 C24 O2 139.19(9) . . . . ?
C15 C22 C24 O2 -35.05(11) . . . . ?
C23 C22 C24 C25 -40.44(12) . . . . ?
C15 C22 C24 C25 145.31(7) . . . . ?
O2 C24 C25 C30 -16.49(12) . . . . ?
C22 C24 C25 C30 163.14(8) . . . . ?
O2 C24 C25 C26 160.13(9) . . . . ?
C22 C24 C25 C26 -20.24(12) . . . . ?
C30 C25 C26 C27 -0.98(13) . . . . ?
C24 C25 C26 C27 -177.59(8) . . . . ?
C25 C26 C27 C28 0.15(14) . . . . ?
C31 O3 C28 C29 2.28(13) . . . . ?
C31 O3 C28 C27 -177.48(8) . . . . ?
C26 C27 C28 O3 -179.41(8) . . . . ?
C26 C27 C28 C29 0.81(14) . . . . ?
O3 C28 C29 C30 179.35(8) . . . . ?
C27 C28 C29 C30 -0.90(13) . . . . ?
C28 C29 C30 C25 0.04(14) . . . . ?
C26 C25 C30 C29 0.90(13) . . . . ?
C24 C25 C30 C29 177.70(8) . . . . ?
 
_refine_diff_density_max    0.384
_refine_diff_density_min   -0.220
_refine_diff_density_rms    0.047

_shelx_res_file
;

    mo_BMS_OMe_0m_a.res created by SHELXL-2014/7

TITL mo_BMS_OMe_0m_a.res in P-1
CELL  0.71073  10.0553  10.7561  13.7858   86.384   69.605   71.368
ZERR  2.000   0.0003   0.0004   0.0005    0.001    0.001    0.001
LATT 1
SFAC C  H  O
UNIT 62  72  6
OMIT 1 0 0
OMIT 3 0 9
OMIT -1 3 4
OMIT 3 -3 6
OMIT 1 0 1
OMIT 2 0 0
OMIT 1 0 2
L.S. 30
ACTA
BOND $H
FMAP 2
PLAN 6
SIZE 0.18 0.09 0.05
CONF
TEMP -173.150
WGHT    0.046800    0.464500
FVAR       0.66508
O1    3    1.010886    0.248428    0.135612    11.00000    0.02026    0.01653 =
         0.02686   -0.00864    0.00179   -0.00699
AFIX 147
H1    2    1.090915    0.239051    0.085401    11.00000   -1.50000
AFIX   0
O2    3    0.706142    0.896766    0.173473    11.00000    0.01933    0.03616 =
         0.02622    0.01357   -0.01034   -0.01343
O3    3    0.093159    0.852317    0.177434    11.00000    0.02304    0.02587 =
         0.02821    0.00797   -0.01504   -0.01452
C1    1    0.853546    0.620637    0.281238    11.00000    0.01421    0.01238 =
         0.01322    0.00060   -0.00508   -0.00380
C2    1    0.764119    0.539800    0.302886    11.00000    0.01426    0.01419 =
         0.01454    0.00020   -0.00262   -0.00449
AFIX  43
H2    2    0.665200    0.571037    0.351590    11.00000   -1.20000
AFIX   0
C3    1    0.814912    0.413947    0.255346    11.00000    0.01520    0.01377 =
         0.01475    0.00101   -0.00356   -0.00578
C4    1    0.962394    0.371842    0.183778    11.00000    0.01530    0.01300 =
         0.01500   -0.00157   -0.00381   -0.00380
C5    1    1.057770    0.449488    0.160867    11.00000    0.01246    0.01512 =
         0.01314    0.00069   -0.00398   -0.00386
C6    1    0.998791    0.574048    0.210992    11.00000    0.01403    0.01424 =
         0.01487    0.00143   -0.00574   -0.00531
AFIX  43
H6    2    1.060202    0.628971    0.196550    11.00000   -1.20000
AFIX   0
C7    1    1.218868    0.403944    0.082197    11.00000    0.01244    0.01852 =
         0.01794   -0.00113   -0.00224   -0.00365
C8    1    1.220019    0.381183   -0.027371    11.00000    0.02102    0.03878 =
         0.01638   -0.00103   -0.00113   -0.00565
AFIX 137
H8A   2    1.155143    0.460520   -0.046606    11.00000   -1.50000
H8B   2    1.183267    0.307271   -0.028170    11.00000   -1.50000
H8C   2    1.322380    0.361282   -0.077024    11.00000   -1.50000
AFIX   0
C9    1    1.316715    0.278992    0.115568    11.00000    0.01686    0.02776 =
         0.02872    0.00057   -0.00613    0.00131
AFIX 137
H9A   2    1.417573    0.251517    0.063365    11.00000   -1.50000
H9B   2    1.272358    0.208555    0.122084    11.00000   -1.50000
H9C   2    1.322388    0.297504    0.182462    11.00000   -1.50000
AFIX   0
C10   1    1.295759    0.508130    0.073835    11.00000    0.01735    0.03040 =
         0.04387   -0.00861    0.00521   -0.01196
AFIX 137
H10A  2    1.239338    0.589460    0.050877    11.00000   -1.50000
H10B  2    1.397824    0.476425    0.023555    11.00000   -1.50000
H10C  2    1.299352    0.525222    0.141719    11.00000   -1.50000
AFIX   0
C11   1    0.712231    0.327576    0.279272    11.00000    0.01751    0.01556 =
         0.01999    0.00044   -0.00274   -0.00826
C12   1    0.557891    0.395390    0.360121    11.00000    0.02002    0.02138 =
         0.03397   -0.00175    0.00249   -0.01096
AFIX 137
H12A  2    0.495633    0.338039    0.372577    11.00000   -1.50000
H12B  2    0.509792    0.478384    0.334390    11.00000   -1.50000
H12C  2    0.569715    0.413041    0.425011    11.00000   -1.50000
AFIX   0
C13   1    0.685483    0.299331    0.180668    11.00000    0.02829    0.03215 =
         0.02889   -0.00006   -0.01053   -0.01790
AFIX 137
H13A  2    0.623244    0.241641    0.196311    11.00000   -1.50000
H13B  2    0.781753    0.256247    0.126685    11.00000   -1.50000
H13C  2    0.634429    0.382130    0.156257    11.00000   -1.50000
AFIX   0
C14   1    0.780695    0.197498    0.323483    11.00000    0.02685    0.01786 =
         0.02954    0.00508   -0.00570   -0.01021
AFIX 137
H14A  2    0.791259    0.216121    0.388615    11.00000   -1.50000
H14B  2    0.879304    0.150476    0.273566    11.00000   -1.50000
H14C  2    0.715083    0.143134    0.336398    11.00000   -1.50000
AFIX   0
C15   1    0.799919    0.757752    0.332387    11.00000    0.01439    0.01187 =
         0.01467    0.00010   -0.00519   -0.00394
AFIX  13
H15   2    0.859371    0.808343    0.282545    11.00000   -1.20000
AFIX   0
C16   1    0.832440    0.760010    0.431957    11.00000    0.01479    0.01407 =
         0.01515   -0.00012   -0.00526   -0.00317
C17   1    0.838256    0.655996    0.497429    11.00000    0.03433    0.01752 =
         0.01933    0.00297   -0.01165   -0.00907
AFIX  43
H17   2    0.822635    0.579041    0.479946    11.00000   -1.20000
AFIX   0
C18   1    0.866839    0.663804    0.588537    11.00000    0.04221    0.02494 =
         0.02082    0.00618   -0.01572   -0.00909
AFIX  43
H18   2    0.871218    0.591942    0.632375    11.00000   -1.20000
AFIX   0
C19   1    0.888872    0.775722    0.615455    11.00000    0.02899    0.03178 =
         0.01980    0.00046   -0.01288   -0.00784
AFIX  43
H19   2    0.907362    0.781096    0.677854    11.00000   -1.20000
AFIX   0
C20   1    0.883740    0.879980    0.550590    11.00000    0.02710    0.02457 =
         0.02385   -0.00210   -0.01236   -0.00990
AFIX  43
H20   2    0.898758    0.956995    0.568582    11.00000   -1.20000
AFIX   0
C21   1    0.856634    0.871733    0.459312    11.00000    0.02267    0.01674 =
         0.02084    0.00121   -0.00987   -0.00709
AFIX  43
H21   2    0.854533    0.943040    0.414932    11.00000   -1.20000
AFIX   0
C22   1    0.637260    0.828510    0.344638    11.00000    0.01592    0.01217 =
         0.01800   -0.00018   -0.00656   -0.00428
C23   1    0.525995    0.867914    0.435254    11.00000    0.01720    0.02099 =
         0.02096   -0.00363   -0.00555   -0.00429
AFIX  93
H23A  2    0.428887    0.919428    0.436762    11.00000   -1.20000
H23B  2    0.543912    0.844446    0.498242    11.00000   -1.20000
AFIX   0
C24   1    0.611229    0.864559    0.244280    11.00000    0.01554    0.01451 =
         0.02071    0.00217   -0.00743   -0.00384
C25   1    0.471744    0.862342    0.230259    11.00000    0.01439    0.01402 =
         0.01809    0.00078   -0.00571   -0.00361
C26   1    0.379945    0.791667    0.291383    11.00000    0.02051    0.01652 =
         0.01973    0.00353   -0.00887   -0.00749
AFIX  43
H26   2    0.403989    0.744492    0.346866    11.00000   -1.20000
AFIX   0
C27   1    0.254528    0.789940    0.271679    11.00000    0.02281    0.02030 =
         0.02274    0.00583   -0.00990   -0.01199
AFIX  43
H27   2    0.192859    0.741933    0.313619    11.00000   -1.20000
AFIX   0
C28   1    0.218876    0.858911    0.190031    11.00000    0.01651    0.01577 =
         0.02167   -0.00023   -0.00790   -0.00623
C29   1    0.310045    0.928200    0.127381    11.00000    0.01653    0.01913 =
         0.02069    0.00465   -0.00795   -0.00579
AFIX  43
H29   2    0.286848    0.974151    0.071201    11.00000   -1.20000
AFIX   0
C30   1    0.435146    0.929041    0.148308    11.00000    0.01531    0.01970 =
         0.02133    0.00563   -0.00642   -0.00649
AFIX  43
H30   2    0.497381    0.976209    0.105765    11.00000   -1.20000
AFIX   0
C31   1    0.054329    0.916564    0.092435    11.00000    0.02257    0.02508 =
         0.02410    0.00254   -0.01285   -0.00935
AFIX 137
H31A  2    0.036501    1.011040    0.100271    11.00000   -1.50000
H31B  2   -0.036583    0.901989    0.091504    11.00000   -1.50000
H31C  2    0.136473    0.880666    0.027314    11.00000   -1.50000
AFIX   0
HKLF 4

REM  mo_BMS_OMe_0m_a.res in P-1
REM R1 =  0.0411 for    7218 Fo > 4sig(Fo)  and  0.0458 for all    8052 data
REM    315 parameters refined using      0 restraints

END

WGHT      0.0468      0.4645

REM Highest difference peak  0.384,  deepest hole -0.220,  1-sigma level  0.047
Q1    1   0.8427  0.8170  0.4473  11.00000  0.05    0.38
Q2    1   1.0196  0.4071  0.1723  11.00000  0.05    0.38
Q3    1   0.8969  0.3861  0.2287  11.00000  0.05    0.38
Q4    1   0.6272  0.8451  0.2979  11.00000  0.05    0.37
Q5    1   0.7927  0.4755  0.2769  11.00000  0.05    0.36
Q6    1   0.4194  0.8350  0.2632  11.00000  0.05    0.36
;
_shelx_res_checksum    2365

_shelx_hkl_file
;
  -1   0   0    0.00    0.10
   1   0   0    0.00    0.10
  -2   0   0  430.56    8.70
  -3   0   0   82.89    2.10
   3   0   0   84.19    2.00
   3   0   0   84.79    2.00
   3   0   0   84.89    1.90
   3   0   0   85.89    2.00
  -4   0   0   50.79    1.30
   4   0   0   49.50    1.40
   4   0   0   50.09    1.30
   4   0   0   51.89    1.40
   4   0   0   49.50    1.30
  -5   0   0    0.50    0.20
   5   0   0    0.60    0.30
   5   0   0    0.50    0.30
   5   0   0    0.80    0.30
   5   0   0    0.40    0.20
   6   0   0   42.40    1.40
   6   0   0   42.40    1.30
   6   0   0   40.10    1.40
   6   0   0   42.20    1.50
   6   0   0   42.30    1.30
   7   0   0   36.40    1.30
   7   0   0   36.40    1.50
   7   0   0   35.90    1.30
   7   0   0   35.30    1.20
   7   0   0   36.20    1.40
   8   0   0    8.10    0.90
   8   0   0    6.30    0.70
   8   0   0    7.60    0.70
   8   0   0    6.70    0.70
   8   0   0    6.90    0.60
   9   0   0   15.40    0.80
   9   0   0   15.40    1.00
   9   0   0   13.30    1.10
   9   0   0   15.90    0.90
  10   0   0   20.60    1.40
  10   0   0   19.50    1.20
  10   0   0   20.40    1.00
  10   0   0   19.00    1.00
  11   0   0    8.70    0.90
  11   0   0    9.20    1.10
  12   0   0   55.79    3.10
  12   0   0   53.19    2.40
  12  -1   0   13.00    1.40
  11  -1   0    9.00    1.30
  11  -1   0    8.60    1.20
  10  -1   0    8.40    0.60
  10  -1   0    8.50    0.60
  10  -1   0   11.80    1.10
  10  -1   0    8.80    1.10
   9  -1   0    9.70    1.00
   9  -1   0   10.20    1.10
   9  -1   0    9.80    0.70
   8  -1   0   31.90    1.60
   8  -1   0   30.60    1.20
   7  -1   0    1.20    0.50
   7  -1   0    2.10    0.40
   7  -1   0    2.00    0.40
   7  -1   0    1.10    0.60
   6  -1   0   73.09    2.20
   6  -1   0   71.49    2.30
   6  -1   0   69.79    1.80
   6  -1   0   73.99    2.00
   6  -1   0   74.79    1.90
  -6   1   0   71.89    1.90
   5  -1   0 1302.57   26.30
   5  -1   0 1245.98   26.60
   5  -1   0 1281.57   26.70
   5  -1   0 1322.87   26.30
   5  -1   0 1343.07   26.50
  -5   1   0 1302.07   26.30
  -5   1   0 1279.07   26.30
   4  -1   0  416.06    8.70
   4  -1   0  396.66    8.90
   4  -1   0  421.06    8.70
   4  -1   0  419.76    9.00
   4  -1   0  427.46    8.80
  -4   1   0  420.06    8.70
  -4   1   0  421.86    8.70
  -4   1   0  418.86    8.80
   3  -1   0   76.69    1.80
   3  -1   0   75.59    1.90
   3  -1   0   74.49    1.70
   3  -1   0   75.79    2.00
   3  -1   0   73.89    1.90
  -3   1   0   75.19    1.90
  -3   1   0   75.19    1.90
  -3   1   0   82.29    1.90
   2  -1   0 1767.62   97.19
  -2   1   0 1864.21  100.99
   1  -1   0   20.20    0.60
   1  -1   0   18.90    0.70
   1  -1   0   19.10    0.60
  -1   1   0   18.30    0.60
  -1   1   0   18.90    0.60
  -2  -1   0  221.98    4.70
   2   1   0  215.18    4.70
   2   1   0  218.68    4.70
  -3  -1   0   78.69    2.00
   3   1   0   75.89    2.00
   3   1   0   74.89    1.90
   4   1   0   29.80    1.00
   4   1   0   29.70    1.10
   4   1   0   27.70    0.80
   4   1   0   30.00    0.70
   5   1   0   89.79    2.30
   5   1   0   90.89    2.10
   5   1   0   88.89    2.10
   5   1   0   85.99    2.40
   6   1   0    6.60    0.60
   6   1   0    8.00    0.60
   6   1   0    7.00    0.50
   6   1   0    7.80    0.70
   7   1   0   17.60    1.00
   7   1   0   17.80    0.90
   7   1   0   16.00    0.80
   7   1   0   16.90    0.80
   8   1   0    2.90    0.50
   8   1   0    3.40    0.60
   8   1   0    3.80    0.50
   8   1   0    3.10    0.60
   9   1   0   27.70    1.40
   9   1   0   26.80    1.20
   9   1   0   28.80    1.70
   9   1   0   28.40    1.20
   9   1   0   26.60    1.20
   9   1   0   27.70    1.10
  10   1   0    0.20    0.50
  10   1   0   -0.10    0.30
  10   1   0    0.30    0.30
  10   1   0   -0.30    0.40
  10   1   0    0.20    0.30
  10   1   0    1.00    0.50
  11   1   0   -0.50    0.50
  11   1   0    1.20    0.40
  11   1   0   -0.40    0.30
  11   1   0   -0.10    0.30
  11   1   0   -0.10    0.50
  12   1   0   -0.20    0.50
  13   1   0    0.00    0.60
  12  -2   0   38.10    2.30
  11  -2   0    5.00    1.00
  11  -2   0    5.10    1.10
  10  -2   0   72.89    2.90
  10  -2   0   71.69    2.70
  10  -2   0   69.09    1.90
   9  -2   0   -0.10    0.60
   9  -2   0   -0.10    0.30
   9  -2   0    0.00    0.40
   8  -2   0   11.40    1.00
   8  -2   0   10.50    1.20
   8  -2   0   10.00    0.70
   7  -2   0   12.80    1.20
   7  -2   0   12.40    1.00
   7  -2   0   13.70    0.80
  -7   2   0   11.70    0.60
  -7   2   0   12.80    0.60
  -7   2   0   12.50    0.60
   6  -2   0  192.28    4.80
   6  -2   0  195.68    4.90
   6  -2   0  193.68    4.50
  -6   2   0  186.58    4.40
  -6   2   0  192.48    4.30
  -6   2   0  189.48    4.30
   5  -2   0  127.19    3.40
   5  -2   0  135.69    3.20
   5  -2   0  129.69    3.60
  -5   2   0  132.39    3.20
  -5   2   0  130.49    3.00
  -5   2   0  130.09    3.30
   4  -2   0  307.27    6.60
   4  -2   0  292.67    6.70
   4  -2   0  296.47    6.90
  -4   2   0  295.07    6.70
  -4   2   0  308.57    6.60
  -4   2   0  303.97    6.40
   3  -2   0  117.89    3.00
   3  -2   0  122.99    3.10
   3  -2   0  121.79    2.90
  -3   2   0  118.69    2.90
  -3   2   0  123.79    3.10
  -3   2   0  123.69    2.80
  -3   2   0  121.49    2.90
   2  -2   0  158.08    3.60
   2  -2   0  151.98    3.70
   2  -2   0  160.48    3.80
  -2   2   0  166.58    3.70
  -2   2   0  169.38    3.60
  -2   2   0  166.48    3.80
  -2   2   0  162.98    3.70
   1  -2   0  537.75   11.20
   0  -2   0 1124.69   72.69
  -1  -2   0  122.39    2.60
  -1  -2   0  120.09    2.60
  -1  -2   0  120.79    2.60
  -1  -2   0  118.49    2.80
  -1  -2   0  117.09    2.80
   1   2   0  118.39    2.60
   1   2   0  117.69    2.70
   1   2   0  126.39    2.80
   1   2   0  118.79    2.60
   1   2   0  118.29    2.80
  -2  -2   0 1855.11   67.69
   2   2   0 1932.21   69.39
  -3  -2   0   28.40    1.10
   3   2   0   29.50    0.90
   3   2   0   28.90    1.00
   3   2   0   28.70    1.10
   4   2   0    1.40    0.30
   4   2   0    1.00    0.40
   4   2   0    1.40    0.30
   5   2   0    3.40    0.50
   5   2   0    3.00    0.50
   5   2   0    3.10    0.50
   6   2   0    4.30    0.30
   6   2   0    4.20    0.30
   6   2   0    4.80    0.70
   6   2   0    4.50    0.60
   6   2   0    3.40    0.50
   7   2   0   11.10    0.90
   7   2   0   10.90    0.80
   7   2   0    9.50    0.80
   7   2   0   10.30    0.60
   7   2   0    9.60    0.50
   8   2   0  327.07    7.50
   8   2   0  320.87    7.00
   8   2   0  328.17    7.30
   8   2   0  325.37    7.10
   8   2   0  327.17    7.70
   9   2   0    5.80    0.70
   9   2   0    6.20    1.00
   9   2   0    5.60    0.70
   9   2   0    5.80    0.80
   9   2   0    4.80    0.50
  10   2   0    8.30    1.00
  10   2   0    6.90    0.70
  10   2   0    8.30    0.90
  10   2   0    8.70    0.70
  10   2   0    7.90    0.90
  11   2   0   84.79    2.40
  11   2   0   86.99    2.70
  11   2   0   79.79    2.50
  11   2   0   84.49    2.50
  11   2   0   86.09    2.90
  12   2   0   66.39    2.60
  12   2   0   68.39    2.00
  12   2   0   65.29    2.20
  12   2   0   67.29    2.00
  12   2   0   68.19    2.40
  13   2   0    0.20    0.60
  13   2   0    0.40    0.70
  11  -3   0    7.40    1.20
  10  -3   0    5.10    1.10
  10  -3   0    8.60    1.10
   9  -3   0   37.30    2.10
   9  -3   0   40.00    2.00
   9  -3   0   39.20    1.40
   8  -3   0   80.49    2.90
   8  -3   0   72.29    2.70
   8  -3   0   76.99    2.20
  -8   3   0   70.29    1.90
  -8   3   0   72.59    1.90
   7  -3   0   14.00    1.10
   7  -3   0   14.70    1.30
   7  -3   0   13.50    0.90
  -7   3   0   14.00    0.90
  -7   3   0   14.90    0.70
  -7   3   0   13.70    0.90
   6  -3   0   96.49    2.60
   6  -3   0   93.49    2.90
   6  -3   0   91.99    3.00
  -6   3   0   96.59    2.70
  -6   3   0   92.99    2.40
   5  -3   0   10.00    1.00
   5  -3   0    8.90    0.70
   5  -3   0    8.60    0.80
  -5   3   0    8.00    0.80
  -5   3   0    8.60    0.60
   4  -3   0    1.50    0.40
   4  -3   0    1.20    0.40
   4  -3   0    2.00    0.60
  -4   3   0    1.80    0.40
  -4   3   0    1.60    0.30
  -4   3   0    1.60    0.40
  -4   3   0    2.80    0.60
   3  -3   0  131.69    3.20
   3  -3   0  125.69    3.30
   3  -3   0  123.79    3.40
  -3   3   0  130.49    3.00
  -3   3   0  125.79    3.20
  -3   3   0  129.89    3.20
  -3   3   0  127.29    3.30
   2  -3   0    9.40    0.60
   2  -3   0    8.60    0.70
   2  -3   0    8.60    0.80
  -2   3   0    9.70    0.60
  -2   3   0   10.20    0.80
  -2   3   0    9.10    0.70
   1  -3   0  176.78    4.10
   1  -3   0  176.08    4.10
   1  -3   0  173.48    4.10
  -1   3   0  181.08    4.20
  -1   3   0  179.18    4.10
  -1   3   0  188.78    3.90
  -1   3   0  174.18    4.10
   0  -3   0 1012.40   82.89
   0   3   0 1176.88   91.39
  -1  -3   0    5.00    0.40
  -1  -3   0    4.40    0.40
  -1  -3   0    4.90    0.50
   1   3   0    4.20    0.50
   1   3   0    5.00    0.50
   1   3   0    4.80    0.50
   1   3   0    4.40    0.40
   1   3   0    4.90    0.40
  -2  -3   0    1.00    0.20
  -2  -3   0    0.70    0.20
  -2  -3   0    0.90    0.30
  -2  -3   0    1.00    0.20
   2   3   0    0.50    0.30
   2   3   0    0.70    0.20
   2   3   0    1.00    0.20
   2   3   0    1.20    0.30
   2   3   0    1.00    0.40
   3   3   0  596.94   12.50
   3   3   0  601.34   12.20
   3   3   0  610.54   12.80
   3   3   0  607.64   12.20
   4   3   0   -0.10    0.30
   4   3   0    0.50    0.30
   4   3   0    0.40    0.20
   5   3   0   36.30    1.40
   5   3   0   36.30    1.40
   5   3   0   35.70    1.50
   5   3   0   36.60    1.30
   6   3   0  122.09    3.30
   6   3   0  120.49    3.40
   6   3   0  123.89    3.20
   6   3   0  122.29    3.30
   7   3   0  724.23   16.20
   7   3   0  742.73   16.00
   7   3   0  760.92   16.20
   7   3   0  763.92   16.00
   8   3   0   95.99    2.30
   8   3   0   97.99    3.20
   8   3   0   98.09    2.20
   8   3   0  100.29    2.90
   8   3   0  100.39    2.90
   9   3   0   75.49    2.70
   9   3   0   76.29    1.90
   9   3   0   73.59    2.00
   9   3   0   77.29    2.40
   9   3   0   76.79    2.50
  10   3   0    5.80    0.50
  10   3   0    6.70    0.80
  10   3   0    7.00    1.00
  10   3   0    6.70    1.00
  10   3   0    6.00    0.80
  10   3   0    6.00    0.70
  11   3   0   25.50    1.30
  11   3   0   25.50    1.10
  11   3   0   24.60    1.60
  11   3   0   24.90    1.20
  11   3   0   23.00    1.60
  11   3   0   25.60    1.30
  12   3   0  134.69    3.60
  12   3   0  128.39    3.50
  12   3   0  140.99    4.50
  12   3   0  137.69    3.60
  12   3   0  129.29    4.20
  12   3   0  130.29    3.50
  12   3   0  135.49    3.60
  13   3   0    1.40    0.50
  13   3   0   -0.50    0.50
  13   3   0   -0.30    0.40
  13   3   0    0.10    0.60
  13   3   0   -0.90    0.60
  11  -4   0   14.20    1.80
  10  -4   0    1.90    0.90
   9  -4   0   -0.70    0.60
   9  -4   0    0.10    0.50
   9  -4   0   -0.30    0.30
   8  -4   0    5.50    0.90
   8  -4   0    5.30    0.70
   8  -4   0    4.30    1.00
  -8   4   0    6.30    0.70
  -8   4   0    8.20    0.80
   7  -4   0    2.30    0.80
   7  -4   0    4.70    0.80
   7  -4   0    3.80    0.60
  -7   4   0    2.30    0.60
  -7   4   0    3.90    0.40
  -7   4   0    4.10    0.60
   6  -4   0    0.20    0.60
   6  -4   0    0.70    0.50
   6  -4   0    0.00    0.30
  -6   4   0   -0.30    0.40
  -6   4   0    0.00    0.30
  -6   4   0   -0.40    0.40
   5  -4   0    1.30    0.60
   5  -4   0    0.00    0.40
   5  -4   0    0.10    0.30
  -5   4   0   -0.10    0.40
  -5   4   0    0.20    0.50
  -5   4   0    0.20    0.30
   4  -4   0    3.10    0.50
   4  -4   0    3.80    0.70
   4  -4   0    3.90    0.60
  -4   4   0    3.30    0.60
  -4   4   0    3.40    0.60
  -4   4   0    3.50    0.60
  -4   4   0    3.70    0.50
   3  -4   0  132.19    3.60
   3  -4   0  135.69    3.50
   3  -4   0  134.29    3.80
   3  -4   0  139.19    3.70
  -3   4   0  136.39    3.70
  -3   4   0  134.39    3.50
  -3   4   0  137.99    3.60
  -3   4   0  139.69    3.30
   2  -4   0    0.60    0.30
   2  -4   0    0.10    0.40
   2  -4   0   -0.30    0.30
   2  -4   0    0.30    0.30
  -2   4   0    0.00    0.40
  -2   4   0    0.00    0.30
  -2   4   0    0.10    0.20
  -2   4   0    0.30    0.40
   1  -4   0    0.30    0.30
   1  -4   0   -0.10    0.30
   1  -4   0   -0.40    0.30
   1  -4   0    0.00    0.30
  -1   4   0    0.20    0.40
  -1   4   0    0.00    0.20
  -1   4   0   -0.20    0.30
  -1   4   0    0.00    0.30
   0  -4   0 1549.94  128.29
   0   4   0 1142.79  106.49
  -1  -4   0    4.80    0.50
  -1  -4   0    4.00    0.40
  -1  -4   0    4.80    0.50
   1   4   0    3.60    0.40
   1   4   0    3.70    0.40
   1   4   0    5.30    0.60
   1   4   0    4.50    0.50
   1   4   0    4.70    0.40
  -2  -4   0  340.17    7.30
  -2  -4   0  333.57    7.70
  -2  -4   0  349.07    7.20
  -2  -4   0  352.46    7.30
   2   4   0  334.47    7.40
   2   4   0  343.17    7.30
   2   4   0  361.66    7.70
   2   4   0  345.27    7.30
   2   4   0  336.07    7.70
   3   4   0  896.01   18.40
  -4  -4   0  508.15   10.40
   4   4   0  489.95   10.00
   4   4   0  474.85   10.70
   4   4   0  483.05   10.80
   4   4   0  488.95   10.30
   5   4   0  199.98    5.00
   5   4   0  206.78    5.10
   5   4   0  202.38    4.70
   5   4   0  199.48    5.00
   6   4   0   52.39    2.00
   6   4   0   47.90    2.10
   6   4   0   51.39    1.90
   6   4   0   50.19    1.70
   7   4   0   22.90    1.20
   7   4   0   20.70    1.50
   7   4   0   22.80    1.30
   7   4   0   21.00    1.10
   8   4   0    0.70    0.50
   8   4   0    0.50    0.40
   8   4   0    0.00    0.50
   8   4   0    0.30    0.40
   9   4   0    1.10    0.60
   9   4   0    0.80    0.50
   9   4   0    1.40    0.50
   9   4   0    1.50    0.50
  10   4   0   48.70    2.00
  10   4   0   48.20    2.10
  10   4   0   47.80    1.30
  10   4   0   46.90    1.40
  10   4   0   50.89    2.00
  10   4   0   50.39    2.30
  11   4   0    0.90    0.50
  11   4   0    1.30    0.30
  11   4   0    1.00    0.70
  11   4   0    1.60    0.40
  11   4   0    0.10    0.40
  11   4   0    1.20    0.60
  12   4   0   15.50    1.10
  12   4   0   15.20    0.90
  12   4   0   17.20    1.40
  12   4   0   15.10    1.10
  12   4   0   16.40    0.80
  12   4   0   17.90    1.40
  13   4   0   33.70    1.50
  13   4   0   34.60    1.60
  13   4   0   34.90    1.40
  13   4   0   34.60    2.00
  13   4   0   36.40    1.60
  13   4   0   34.00    1.30
  10  -5   0    1.60    1.00
   9  -5   0    0.40    0.70
   9  -5   0    0.20    0.30
  -9   5   0    0.10    0.40
  -9   5   0    0.10    0.40
   8  -5   0    4.00    1.00
   8  -5   0    2.40    0.80
   8  -5   0    2.70    0.60
  -8   5   0    4.30    0.70
  -8   5   0    3.10    0.60
   7  -5   0   19.50    1.50
   7  -5   0   20.20    1.20
   7  -5   0   19.10    1.60
   7  -5   0   17.70    1.50
  -7   5   0   16.90    0.80
  -7   5   0   20.20    1.30
  -7   5   0   17.00    1.20
   6  -5   0   14.80    1.50
   6  -5   0   12.70    1.20
   6  -5   0   13.10    1.00
   6  -5   0   14.50    1.30
  -6   5   0   13.60    0.80
  -6   5   0   13.50    1.10
  -6   5   0   13.30    1.20
   5  -5   0  950.60   20.40
   5  -5   0  942.11   19.90
   5  -5   0  936.31   20.50
   5  -5   0  935.61   20.30
  -5   5   0  945.71   19.90
  -5   5   0  952.80   20.00
  -5   5   0  944.11   19.60
  -5   5   0  926.01   20.20
   4  -5   0   69.19    2.50
   4  -5   0   70.39    2.30
   4  -5   0   69.49    2.40
   4  -5   0   72.09    2.70
  -4   5   0   69.09    2.60
  -4   5   0   71.69    2.30
  -4   5   0   70.99    2.10
  -4   5   0   72.29    2.40
   3  -5   0  183.88    4.90
   3  -5   0  189.18    4.90
   3  -5   0  183.38    5.00
   3  -5   0  191.98    4.80
  -3   5   0  200.18    4.60
  -3   5   0  193.18    5.00
  -3   5   0  191.18    4.80
   2  -5   0  156.28    4.20
   2  -5   0  157.68    4.10
   2  -5   0  150.58    4.00
   2  -5   0  145.59    4.00
  -2   5   0  156.88    4.10
  -2   5   0  162.48    3.50
  -2   5   0  158.18    4.00
  -2   5   0  161.48    4.20
   1  -5   0  147.69    3.70
   1  -5   0  144.29    3.70
   1  -5   0  143.99    3.80
   1  -5   0  135.79    3.80
  -1   5   0  148.69    3.40
  -1   5   0  148.49    3.80
  -1   5   0  139.29    3.70
  -1   5   0  146.29    3.90
   0  -5   0    5.60    0.60
   0  -5   0    6.30    0.70
   0  -5   0    5.20    0.70
   0  -5   0    5.70    0.70
   0   5   0    3.80    0.60
   0   5   0    6.60    0.70
   0   5   0    5.20    0.50
  -1  -5   0  122.99    3.10
  -1  -5   0  124.89    3.20
  -1  -5   0  126.59    3.10
   1   5   0  121.99    3.30
   1   5   0  132.59    3.30
   1   5   0  127.79    3.40
   1   5   0  123.69    3.20
   1   5   0  122.89    3.10
  -2  -5   0  258.07    5.50
  -2  -5   0  251.07    5.50
  -2  -5   0  249.38    6.00
  -2  -5   0  253.67    5.60
   2   5   0  258.97    5.90
   2   5   0  244.58    5.50
   2   5   0  237.68    5.90
   2   5   0  242.18    5.60
   2   5   0  238.78    5.60
  -3  -5   0  117.39    2.90
  -3  -5   0  119.69    2.70
  -3  -5   0  116.49    3.30
   3   5   0  116.09    2.90
   3   5   0  119.79    3.30
   3   5   0  116.69    2.90
   3   5   0  118.29    2.90
  -4  -5   0   94.59    2.90
  -4  -5   0   96.29    2.50
   4   5   0   97.69    2.40
   4   5   0   99.39    2.90
   4   5   0   93.39    2.90
   4   5   0   94.09    2.50
   4   5   0   94.49    2.30
   5   5   0  164.28    3.90
   5   5   0  170.68    3.60
   5   5   0  155.88    4.30
   5   5   0  165.88    3.60
   6   5   0  169.98    4.70
   6   5   0  153.88    4.30
   6   5   0  161.88    4.00
   6   5   0  153.98    4.30
   7   5   0  205.58    5.60
   7   5   0  214.28    5.10
   7   5   0  211.18    5.50
   7   5   0  211.48    5.40
   8   5   0  266.27    6.60
   8   5   0  254.37    6.70
   8   5   0  256.17    6.50
   8   5   0  266.57    6.30
   9   5   0   94.59    3.10
   9   5   0   88.19    3.00
   9   5   0   89.79    3.30
   9   5   0   90.39    2.90
  10   5   0   46.80    2.00
  10   5   0   46.00    2.30
  10   5   0   48.50    2.10
  10   5   0   47.80    2.00
  11   5   0    4.60    0.80
  11   5   0    7.30    0.90
  11   5   0    5.80    0.90
  11   5   0    6.00    1.10
  12   5   0    0.50    0.50
  12   5   0    0.20    0.60
  12   5   0   -0.20    0.40
  12   5   0   -0.30    0.40
  13   5   0   25.90    1.40
  13   5   0   25.00    0.90
  13   5   0   26.80    1.70
  13   5   0   26.00    1.50
  10  -6   0    8.10    1.70
   9  -6   0   38.80    2.60
   9  -6   0   37.90    1.60
  -9   6   0   41.20    1.70
   8  -6   0    6.40    1.30
   8  -6   0    7.20    0.80
  -8   6   0    7.40    1.00
  -8   6   0    6.70    0.90
   7  -6   0    6.30    0.80
   7  -6   0    4.60    1.10
   7  -6   0    4.90    1.00
  -7   6   0    4.00    0.80
  -7   6   0    6.80    1.00
  -7   6   0    5.60    0.60
   6  -6   0   38.00    2.10
   6  -6   0   31.20    1.60
  -6   6   0   30.80    1.70
  -6   6   0   33.20    1.80
  -6   6   0   32.60    1.40
   5  -6   0  244.18    6.10
   5  -6   0  248.18    6.60
   5  -6   0  243.88    6.30
  -5   6   0  240.08    6.10
  -5   6   0  236.98    6.30
  -5   6   0  237.88    6.00
  -5   6   0  244.28    5.70
   4  -6   0  117.79    3.60
   4  -6   0  114.39    3.80
   4  -6   0  119.99    3.50
   4  -6   0  103.79    3.50
  -4   6   0  120.99    3.40
  -4   6   0  121.89    3.30
  -4   6   0  119.49    3.50
  -4   6   0  117.49    3.70
   3  -6   0   47.80    1.90
   3  -6   0   48.00    2.00
   3  -6   0   46.50    2.10
  -3   6   0   47.40    1.90
  -3   6   0   46.30    1.70
  -3   6   0   45.40    2.00
  -3   6   0   47.60    1.90
   2  -6   0   52.39    2.00
   2  -6   0   48.20    1.90
   2  -6   0   55.29    2.20
  -2   6   0   50.29    1.40
  -2   6   0   51.29    2.10
  -2   6   0   49.80    1.90
  -2   6   0   53.59    2.00
   1  -6   0  266.17    6.70
   1  -6   0  284.27    6.60
   1  -6   0  282.77    6.60
   1  -6   0  275.17    6.70
  -1   6   0  287.57    6.20
  -1   6   0  265.27    6.50
  -1   6   0  274.27    6.70
  -1   6   0  284.27    6.70
   0  -6   0  206.28    5.10
   0  -6   0  199.68    5.20
   0  -6   0  201.88    5.00
   0  -6   0  209.28    5.00
   0   6   0  202.88    5.00
   0   6   0  210.18    5.20
   0   6   0  198.68    5.10
   0   6   0  204.38    4.80
  -1  -6   0   14.40    1.10
  -1  -6   0   15.40    1.00
  -1  -6   0   17.00    0.90
  -1  -6   0   15.40    0.90
   1   6   0   15.40    1.00
   1   6   0   15.80    1.00
   1   6   0   13.80    1.00
   1   6   0   15.20    0.90
  -2  -6   0  414.36    8.80
  -2  -6   0  411.16    8.70
  -2  -6   0  396.76    9.20
  -2  -6   0  409.56    8.80
   2   6   0  415.16    9.10
   2   6   0  404.06    8.80
   2   6   0  379.06    8.90
   2   6   0  382.76    8.90
  -3  -6   0    2.40    0.50
  -3  -6   0    4.50    0.40
  -3  -6   0    4.60    0.50
  -3  -6   0    4.60    0.50
   3   6   0    2.90    0.50
   3   6   0    4.50    0.60
   3   6   0    3.30    0.40
   3   6   0    5.50    0.70
   3   6   0    4.50    0.50
  -4  -6   0   57.69    1.80
  -4  -6   0   58.79    2.20
   4   6   0   55.69    1.70
   4   6   0   55.29    2.20
   4   6   0   57.89    1.80
   4   6   0   57.29    2.10
   4   6   0   57.49    1.70
  -5  -6   0   51.59    1.70
   5   6   0   52.29    1.50
   5   6   0   51.29    2.10
   5   6   0   51.79    1.60
   5   6   0   51.59    2.10
   5   6   0   52.19    1.70
   6   6   0    4.20    0.70
   6   6   0    4.30    0.70
   6   6   0    5.70    0.60
   7   6   0   42.50    1.20
   7   6   0   41.10    1.20
   7   6   0   42.50    1.90
   7   6   0   44.60    2.10
   7   6   0   44.40    2.00
   7   6   0   42.20    1.60
   8   6   0  222.88    5.50
   8   6   0  223.38    5.90
   8   6   0  220.88    5.90
   8   6   0  225.28    6.10
   9   6   0    1.10    0.60
   9   6   0    0.20    0.50
   9   6   0    0.30    0.60
   9   6   0    0.50    0.40
  10   6   0    4.90    0.90
  10   6   0    5.40    0.80
  10   6   0    4.50    0.80
  11   6   0    2.60    0.70
  11   6   0    2.40    0.80
  11   6   0    2.30    0.70
  11   6   0    3.70    0.70
  12   6   0   18.00    1.30
  12   6   0   16.90    1.30
  12   6   0   15.10    1.30
  13   6   0    0.10    0.40
  13   6   0    0.10    0.50
  13   6   0    0.90    0.50
   9  -7   0   37.30    2.30
  -9   7   0   35.50    1.70
  -9   7   0   38.50    1.80
   8  -7   0    0.00    1.00
   8  -7   0    1.50    0.50
  -8   7   0    2.10    0.70
  -8   7   0    0.40    0.60
   7  -7   0   24.50    2.00
   7  -7   0   20.00    1.40
  -7   7   0   21.90    1.10
  -7   7   0   22.40    1.50
  -7   7   0   21.60    1.60
   6  -7   0   48.10    2.10
   6  -7   0   49.70    2.60
   6  -7   0   50.59    2.50
  -6   7   0   51.49    2.20
  -6   7   0   49.80    2.40
  -6   7   0   49.80    1.80
   5  -7   0   11.20    1.20
   5  -7   0   10.10    1.10
  -5   7   0    9.40    0.90
  -5   7   0    8.20    1.10
  -5   7   0   10.40    1.20
  -5   7   0   10.50    1.10
   4  -7   0    3.30    0.90
   4  -7   0    3.30    0.70
   4  -7   0    2.80    0.70
  -4   7   0    3.10    0.80
  -4   7   0    2.70    0.70
  -4   7   0    2.70    0.60
  -4   7   0    3.00    0.80
   3  -7   0   36.80    1.80
   3  -7   0   34.90    1.70
   3  -7   0   38.80    2.00
   3  -7   0   32.50    1.70
  -3   7   0   37.10    1.70
  -3   7   0   35.10    1.70
  -3   7   0   37.80    2.00
  -3   7   0   37.80    1.80
   2  -7   0   14.10    1.10
   2  -7   0   12.40    1.30
   2  -7   0   13.50    1.10
  -2   7   0   13.60    1.10
  -2   7   0   14.70    0.70
  -2   7   0   16.70    1.40
  -2   7   0   13.00    1.10
   1  -7   0  182.58    5.00
   1  -7   0  190.88    4.80
   1  -7   0  179.68    5.30
   1  -7   0  181.38    4.80
  -1   7   0  185.98    4.90
  -1   7   0  182.78    4.90
  -1   7   0  181.28    5.00
  -1   7   0  190.18    4.40
   0  -7   0    2.70    0.50
   0  -7   0    2.30    0.50
   0  -7   0    2.80    0.60
   0  -7   0    2.40    0.60
   0   7   0    1.60    0.60
   0   7   0    2.90    0.60
   0   7   0    2.90    0.50
   0   7   0    3.20    0.70
  -1  -7   0  118.89    3.70
  -1  -7   0  121.99    3.30
  -1  -7   0  127.39    3.40
  -1  -7   0  121.99    3.30
   1   7   0  119.69    3.50
   1   7   0  122.69    3.40
   1   7   0  117.29    3.40
   1   7   0  115.69    3.30
   1   7   0  121.19    3.60
  -2  -7   0  147.49    4.40
  -2  -7   0  146.09    3.70
  -2  -7   0  144.49    3.70
  -2  -7   0  146.79    3.70
   2   7   0  140.79    3.80
   2   7   0  148.79    4.20
   2   7   0  146.59    3.90
   2   7   0  141.39    3.70
   2   7   0  142.79    3.90
  -3  -7   0  241.18    5.60
  -3  -7   0  245.08    5.50
  -3  -7   0  238.38    5.40
   3   7   0  240.58    5.80
   3   7   0  239.68    6.20
   3   7   0  239.38    6.00
   3   7   0  239.08    5.70
  -4  -7   0   10.30    0.50
  -4  -7   0    9.70    0.70
  -4  -7   0   10.20    0.50
  -4  -7   0   10.80    1.00
   4   7   0    9.80    0.80
   4   7   0   10.60    1.00
   4   7   0   11.20    0.80
   4   7   0   10.80    1.10
   4   7   0   10.40    0.70
  -5  -7   0   19.60    1.00
   5   7   0   21.90    1.00
   5   7   0   22.00    1.40
   5   7   0   21.10    1.10
   5   7   0   22.50    1.10
   5   7   0   22.30    1.40
  -6  -7   0   15.10    0.90
   6   7   0   16.80    0.90
   6   7   0   17.00    0.80
   6   7   0   16.30    1.30
   6   7   0   17.00    1.30
   6   7   0   17.90    0.90
   7   7   0   52.39    1.60
   7   7   0   52.99    2.30
   7   7   0   53.39    1.50
   7   7   0   53.99    2.30
   7   7   0   50.29    2.30
   7   7   0   52.69    1.80
   8   7   0   23.30    1.60
   8   7   0   23.40    0.90
   8   7   0   24.00    1.70
   8   7   0   25.10    1.30
   8   7   0   26.10    1.60
   8   7   0   24.50    0.90
   9   7   0    0.30    0.40
   9   7   0    0.20    0.50
   9   7   0    0.10    0.20
   9   7   0    0.40    0.30
   9   7   0    0.40    0.50
   9   7   0    0.40    0.50
  10   7   0   62.79    2.60
  10   7   0   56.89    2.50
  10   7   0   54.19    2.70
  10   7   0   58.29    2.20
  11   7   0  167.88    5.00
  11   7   0  167.18    4.60
  11   7   0  156.98    4.80
  12   7   0    0.20    0.40
  12   7   0    0.90    0.50
  13   7   0   10.90    1.10
  13   7   0   10.90    1.20
   8  -8   0    9.40    1.10
   8  -8   0    8.70    2.40
  -8   8   0    9.50    1.20
  -8   8   0   11.20    1.30
   7  -8   0    0.30    0.90
   7  -8   0    0.40    0.50
  -7   8   0    1.50    0.50
  -7   8   0    0.10    0.60
  -7   8   0    2.50    0.80
   6  -8   0   57.29    2.40
   6  -8   0   62.89    3.10
  -6   8   0   56.89    2.50
  -6   8   0   57.29    2.40
  -6   8   0   51.29    2.50
   5  -8   0    2.40    0.70
   5  -8   0    3.10    1.10
  -5   8   0    2.70    1.20
  -5   8   0    1.80    0.60
  -5   8   0    2.50    0.70
   4  -8   0   16.50    1.30
   4  -8   0   16.20    1.60
  -4   8   0   18.10    1.20
  -4   8   0   15.80    1.40
  -4   8   0   16.60    1.40
   3  -8   0  154.68    4.60
   3  -8   0  151.88    4.80
   3  -8   0  164.18    5.50
  -3   8   0  149.49    4.40
  -3   8   0  151.18    4.80
  -3   8   0  158.88    4.60
  -3   8   0  148.09    4.30
   2  -8   0   76.09    2.80
   2  -8   0   80.99    2.90
   2  -8   0   81.59    3.10
  -2   8   0   75.59    2.80
  -2   8   0   77.19    3.00
  -2   8   0   76.19    2.10
  -2   8   0   73.99    2.80
   1  -8   0    7.40    1.00
   1  -8   0    6.80    1.00
   1  -8   0    8.00    0.90
   1  -8   0    9.70    1.10
  -1   8   0    7.90    1.00
  -1   8   0    7.10    0.70
  -1   8   0    6.30    1.00
  -1   8   0    8.30    1.00
   0  -8   0  155.48    4.50
   0  -8   0  149.19    4.20
   0  -8   0  149.69    4.30
   0  -8   0  148.09    4.10
   0   8   0  149.09    4.20
   0   8   0  151.88    4.00
   0   8   0  151.58    4.50
   0   8   0  155.48    4.40
  -1  -8   0   86.09    3.00
  -1  -8   0   86.09    3.00
  -1  -8   0   79.69    2.70
   1   8   0   74.09    2.50
   1   8   0   82.39    2.90
   1   8   0   76.19    2.60
   1   8   0   76.69    2.80
  -2  -8   0  442.56    9.80
  -2  -8   0  438.96    9.70
  -2  -8   0  435.96   10.40
  -2  -8   0  435.36    9.70
   2   8   0  435.66   10.10
   2   8   0  433.76    9.90
   2   8   0  428.16   10.30
   2   8   0  430.26    9.70
   2   8   0  437.36   10.00
  -3  -8   0   80.59    2.50
  -3  -8   0   78.79    2.30
  -3  -8   0   76.09    2.30
  -3  -8   0   78.49    2.90
   3   8   0   79.49    2.90
   3   8   0   78.99    3.50
   3   8   0   78.49    2.70
   3   8   0   81.79    2.60
   3   8   0   77.89    2.40
  -4  -8   0   29.50    1.30
  -4  -8   0   25.90    1.00
  -4  -8   0   30.30    1.70
   4   8   0   28.70    1.30
   4   8   0   24.60    1.40
   4   8   0   27.90    1.30
   4   8   0   25.00    1.60
   4   8   0   26.90    1.60
  -5  -8   0    0.10    0.30
   5   8   0    0.70    0.50
   5   8   0    0.20    0.40
   5   8   0   -0.30    0.30
   5   8   0    0.30    0.50
   5   8   0    0.50    0.40
  -6  -8   0   12.10    0.90
   6   8   0   12.00    1.30
   6   8   0   11.40    0.80
   6   8   0   11.30    0.90
   7   8   0   27.60    1.80
   7   8   0   23.50    1.10
   7   8   0   26.20    1.70
   7   8   0   25.30    1.20
   7   8   0   22.80    1.10
   8   8   0    7.40    0.80
   8   8   0    5.70    1.00
   8   8   0    6.10    1.00
   8   8   0    6.50    0.70
   8   8   0    3.50    0.70
   8   8   0    6.00    0.60
   9   8   0   14.20    1.40
   9   8   0   15.50    1.00
   9   8   0   15.30    0.80
   9   8   0   15.80    1.40
   9   8   0   16.00    1.40
   9   8   0   16.10    0.80
  10   8   0    4.20    0.90
  10   8   0    5.20    0.50
  10   8   0    5.10    1.00
  10   8   0    6.10    0.80
  10   8   0    5.50    0.50
  11   8   0    2.40    0.80
  11   8   0    2.60    0.60
  12   8   0    0.10    0.40
  12   8   0    0.30    0.60
  12   8   0    1.10    0.60
  13   8   0   17.70    1.50
  13   8   0   16.80    1.50
  13   8   0   15.90    1.20
   7  -9   0   11.10    1.20
   7  -9   0    7.80    1.70
  -7   9   0   10.00    0.90
  -7   9   0   11.30    1.40
   6  -9   0    0.00    0.40
   6  -9   0    1.20    0.90
  -6   9   0    1.10    0.50
  -6   9   0   -0.10    0.60
  -6   9   0   -0.30    0.50
   5  -9   0   12.50    1.30
   5  -9   0   11.40    1.60
  -5   9   0   12.40    1.40
  -5   9   0   13.50    1.30
  -5   9   0   12.20    1.10
  -5   9   0   14.30    1.50
   4  -9   0   31.40    1.90
   4  -9   0   35.50    2.30
  -4   9   0   33.80    2.10
  -4   9   0   33.20    1.70
  -4   9   0   32.90    1.90
  -4   9   0   32.70    2.00
   3  -9   0    6.40    1.00
   3  -9   0    4.20    1.00
   3  -9   0    5.90    1.00
  -3   9   0    6.10    1.10
  -3   9   0    4.70    0.90
  -3   9   0    6.10    1.00
   2  -9   0    0.90    0.60
   2  -9   0   -0.10    0.70
  -2   9   0    0.90    0.40
  -2   9   0    1.90    0.70
  -2   9   0    1.20    0.70
   1  -9   0  365.96    9.20
   1  -9   0  367.56    9.10
   1  -9   0  373.56    8.90
   1  -9   0  369.26    8.90
  -1   9   0  360.26    8.30
  -1   9   0  367.96    9.00
  -1   9   0  371.46    9.10
   0  -9   0   24.90    1.70
   0  -9   0   29.40    1.70
   0  -9   0   28.50    1.60
   0  -9   0   25.20    1.50
   0   9   0   28.60    1.70
   0   9   0   25.90    1.60
   0   9   0   25.70    1.40
  -1  -9   0   30.80    1.60
  -1  -9   0   27.90    1.60
  -1  -9   0   27.70    1.80
  -1  -9   0   28.80    1.50
   1   9   0   34.60    1.70
   1   9   0   27.10    1.70
   1   9   0   27.40    1.70
   1   9   0   29.90    1.80
  -2  -9   0    5.00    0.90
  -2  -9   0    7.20    0.90
  -2  -9   0    5.50    0.80
  -2  -9   0    7.10    0.90
   2   9   0    6.10    0.90
   2   9   0    6.00    0.90
   2   9   0    6.00    0.80
   2   9   0    6.20    0.90
   2   9   0    7.40    1.00
  -3  -9   0   33.40    1.50
  -3  -9   0   37.90    1.60
  -3  -9   0   35.00    2.00
   3   9   0   33.80    1.80
   3   9   0   32.30    1.80
   3   9   0   35.00    2.00
   3   9   0   34.10    1.60
   3   9   0   33.60    1.70
  -4  -9   0   75.19    2.20
  -4  -9   0   74.69    2.20
  -4  -9   0   78.69    2.50
   4   9   0   74.99    2.70
   4   9   0   78.99    2.60
   4   9   0   79.09    2.90
   4   9   0   82.29    3.10
   4   9   0   78.99    2.50
  -5  -9   0    0.00    0.30
  -5  -9   0    0.30    0.60
   5   9   0    0.10    0.50
   5   9   0    0.10    0.40
   5   9   0    0.40    0.50
   5   9   0    0.00    0.30
   5   9   0   -0.50    0.50
  -6  -9   0    4.60    0.70
   6   9   0    4.20    0.80
   6   9   0    5.60    0.70
   6   9   0    5.40    0.70
   6   9   0    5.70    1.00
   7   9   0    1.00    0.60
   7   9   0    0.40    0.40
   7   9   0    0.60    0.40
   7   9   0    0.30    0.40
   8   9   0    3.10    0.60
   8   9   0    2.80    0.70
   8   9   0    2.30    0.90
   8   9   0    2.30    0.50
   8   9   0    3.20    0.90
   8   9   0    2.10    0.50
   9   9   0   59.49    1.80
   9   9   0   55.09    2.70
   9   9   0   58.89    2.10
   9   9   0   56.09    1.90
   9   9   0   59.19    2.90
  10   9   0    0.90    0.70
  10   9   0    0.50    0.40
  10   9   0    0.30    0.40
  10   9   0    0.60    0.60
  10   9   0    0.80    0.30
  11   9   0   17.80    1.60
  11   9   0   20.60    1.70
  11   9   0   19.10    0.80
  11   9   0   18.30    1.20
  11   9   0   18.50    0.90
  12   9   0    5.80    0.80
  12   9   0    6.40    1.10
  12   9   0    6.50    1.10
   6 -10   0   10.10    1.70
   6 -10   0   14.10    1.40
  -6  10   0   16.10    1.40
  -6  10   0   12.40    1.50
  -6  10   0   13.10    1.20
   5 -10   0   -0.10    0.50
   5 -10   0    0.80    0.90
  -5  10   0    0.70    0.70
  -5  10   0    0.00    0.50
  -5  10   0    0.60    0.70
   4 -10   0    0.50    0.90
  -4  10   0    0.20    0.70
  -4  10   0   -0.30    0.60
  -4  10   0    1.10    0.60
   3 -10   0  123.39    4.40
   3 -10   0  123.19    4.30
  -3  10   0  116.29    3.90
  -3  10   0  120.89    4.10
  -3  10   0  125.09    4.20
   2 -10   0    4.00    0.80
   2 -10   0    2.80    0.80
   2 -10   0    2.70    0.90
   2 -10   0    3.00    0.80
  -2  10   0    3.60    0.60
  -2  10   0    2.80    0.90
  -2  10   0    3.10    0.90
  -2  10   0    3.20    0.90
   1 -10   0   29.90    1.90
  -1  10   0   32.00    1.90
  -1  10   0   29.80    1.90
  -1  10   0   30.50    1.40
   0 -10   0   21.20    1.70
   0 -10   0   21.30    1.40
   0 -10   0   23.60    1.50
   0 -10   0   24.60    1.70
   0  10   0   23.50    1.60
   0  10   0   20.30    1.60
  -1 -10   0   58.29    2.40
  -1 -10   0   56.59    2.30
  -1 -10   0   58.09    2.30
  -1 -10   0   52.99    2.60
   1  10   0   54.79    2.60
   1  10   0   57.39    2.60
   1  10   0   57.29    2.40
   1  10   0   55.29    2.20
  -2 -10   0  208.78    5.40
  -2 -10   0  211.68    5.50
  -2 -10   0  206.68    5.50
  -2 -10   0  206.68    6.10
   2  10   0  207.58    5.90
   2  10   0  211.38    5.70
   2  10   0  211.38    6.10
   2  10   0  216.88    5.70
  -3 -10   0   32.30    1.60
  -3 -10   0   31.20    1.50
   3  10   0   34.30    2.00
   3  10   0   33.60    1.70
   3  10   0   33.10    1.60
   3  10   0   30.20    1.80
   3  10   0   26.90    1.70
  -4 -10   0    2.10    0.50
  -4 -10   0    1.60    0.50
  -4 -10   0    1.90    0.60
   4  10   0    0.40    0.50
   4  10   0    1.40    0.60
   4  10   0    2.00    0.70
   4  10   0    0.80    0.50
   4  10   0    1.90    0.70
  -5 -10   0   18.80    0.80
  -5 -10   0   18.50    1.20
  -5 -10   0   18.90    0.80
   5  10   0   17.00    1.70
   5  10   0   19.60    1.40
   5  10   0   19.40    1.20
   5  10   0   19.50    1.70
   5  10   0   18.40    1.30
  -6 -10   0    1.00    0.50
   6  10   0    1.50    0.60
   6  10   0    0.50    0.60
   6  10   0    0.50    0.60
   6  10   0    1.10    0.50
  -7 -10   0    1.90    0.50
   7  10   0    2.00    0.60
   7  10   0    1.70    0.50
   7  10   0    1.80    0.60
   7  10   0    1.20    1.00
   8  10   0   58.09    2.10
   8  10   0   58.89    2.90
   8  10   0   57.99    2.90
   8  10   0   62.19    2.10
   8  10   0   60.49    2.20
   9  10   0    5.30    0.70
   9  10   0    3.70    1.00
   9  10   0    4.60    1.10
   9  10   0    4.30    0.70
  10  10   0   13.60    1.70
  10  10   0   11.30    1.00
  10  10   0   12.80    0.90
  10  10   0   12.90    1.00
  10  10   0   10.50    1.40
  11  10   0   15.10    1.60
  11  10   0   13.90    0.90
  11  10   0   17.20    1.10
  11  10   0   14.60    1.60
  11  10   0   16.30    1.10
  12  10   0   14.70    1.60
  12  10   0   17.50    1.70
  12  10   0   16.00    1.10
  12  10   0   16.20    1.20
  12  10   0   15.80    0.80
   5 -11   0   -1.20    0.80
  -5  11   0    0.40    0.80
  -5  11   0    0.70    0.70
   4 -11   0    3.00    1.20
  -4  11   0    2.00    0.80
  -4  11   0    3.60    1.10
   3 -11   0   56.39    2.90
   3 -11   0   56.09    3.00
  -3  11   0   59.39    2.90
  -3  11   0   63.29    2.90
   2 -11   0    3.50    1.00
   2 -11   0    3.20    0.90
  -2  11   0    4.60    0.60
  -2  11   0    2.70    0.80
  -2  11   0    3.70    0.90
   1 -11   0    3.50    0.80
   1 -11   0    4.00    0.90
   1 -11   0    1.80    0.80
   1 -11   0    3.30    1.00
  -1  11   0    2.60    0.90
  -1  11   0    4.30    0.70
  -1  11   0    2.00    0.80
   0 -11   0   78.79    3.40
   0 -11   0   76.99    3.20
   0  11   0   79.79    3.20
   0  11   0   80.09    2.80
   0  11   0   85.59    3.40
  -1 -11   0   10.20    1.30
  -1 -11   0   11.30    1.40
  -1 -11   0   13.00    1.60
   1  11   0    9.90    1.30
   1  11   0    8.30    1.30
   1  11   0   11.00    1.10
   1  11   0   11.80    1.40
  -2 -11   0    0.10    0.60
  -2 -11   0    0.30    0.40
  -2 -11   0   -0.40    0.50
  -2 -11   0    0.20    0.50
   2  11   0    0.60    0.70
   2  11   0   -0.30    0.50
   2  11   0    2.20    0.70
  -3 -11   0   99.19    3.10
  -3 -11   0   94.29    3.20
  -3 -11   0  102.59    3.20
   3  11   0  104.69    3.50
   3  11   0  100.69    3.50
   3  11   0   97.69    3.70
   3  11   0  104.29    3.90
  -4 -11   0    1.70    0.60
  -4 -11   0    3.10    0.60
  -4 -11   0    2.60    0.60
   4  11   0    2.50    0.80
   4  11   0    2.90    0.80
   4  11   0    2.60    0.80
   4  11   0    2.20    0.70
  -5 -11   0    1.30    0.30
  -5 -11   0    1.70    0.40
  -5 -11   0    1.20    0.50
   5  11   0    1.80    0.80
   5  11   0    0.60    0.70
   5  11   0    0.60    0.50
   5  11   0    0.50    0.30
   5  11   0    1.60    0.60
  -6 -11   0   41.30    1.80
   6  11   0   37.40    2.20
   6  11   0   42.60    1.80
   6  11   0   43.30    1.90
   6  11   0   39.10    2.00
   6  11   0   44.10    2.50
  -7 -11   0   -0.10    0.40
   7  11   0    0.90    0.50
   7  11   0    0.30    0.40
   7  11   0    0.90    0.70
   7  11   0    0.10    0.50
   8  11   0    0.40    0.60
   8  11   0    0.30    0.60
   8  11   0    0.10    0.40
   8  11   0    1.00    0.80
   8  11   0    0.30    0.40
   9  11   0    1.90    1.00
   9  11   0    3.10    0.70
   9  11   0    3.00    0.60
   9  11   0    1.50    0.80
   9  11   0    2.20    0.60
  10  11   0  110.79    3.20
  10  11   0  111.49    3.40
  10  11   0  114.59    3.40
  10  11   0  113.49    4.40
  10  11   0  114.19    4.40
  11  11   0   45.90    1.90
  11  11   0   42.70    1.80
  11  11   0   46.00    1.70
  11  11   0   46.70    2.70
  11  11   0   42.50    2.60
   4 -12   0   20.00    2.20
  -4  12   0   21.90    1.90
  -4  12   0   19.40    1.90
   3 -12   0   16.90    3.00
  -3  12   0   14.90    1.70
  -3  12   0   13.60    1.70
   2 -12   0   13.50    1.70
  -2  12   0   13.40    2.20
  -2  12   0   17.50    1.70
  -2  12   0   14.80    0.90
  -2  12   0   16.50    1.70
   1 -12   0   30.00    2.20
  -1  12   0   31.80    2.20
  -1  12   0   32.70    1.60
  -1  12   0   30.30    2.20
   0 -12   0    3.90    1.00
   0  12   0    2.70    0.70
   0  12   0    3.30    1.00
   0  12   0    1.80    0.80
  -1 -12   0    1.00    0.80
  -1 -12   0    1.30    0.60
  -1 -12   0    1.70    0.70
   1  12   0    0.90    0.50
   1  12   0    0.00    0.60
   1  12   0    0.20    0.70
  -2 -12   0   15.90    1.50
  -2 -12   0   16.30    2.20
   2  12   0   17.20    1.70
   2  12   0   16.70    1.40
   2  12   0   16.90    1.50
  -3 -12   0    1.70    0.60
  -3 -12   0    0.80    0.60
  -3 -12   0    1.10    0.60
   3  12   0    1.00    0.70
   3  12   0    0.90    0.70
   3  12   0    1.70    0.90
  -4 -12   0   20.60    1.30
  -4 -12   0   23.50    1.30
  -4 -12   0   23.30    1.40
   4  12   0   22.00    1.60
   4  12   0   23.00    1.80
   4  12   0   22.40    1.60
   4  12   0   22.40    1.90
  -5 -12   0    1.50    0.40
  -5 -12   0    2.10    0.60
  -5 -12   0    1.50    0.40
   5  12   0    1.50    0.60
   5  12   0    1.60    0.80
   5  12   0    3.50    0.90
   5  12   0    2.80    1.00
  -6 -12   0  246.78    6.40
   6  12   0  250.87    7.40
   6  12   0  247.88    6.50
   6  12   0  247.48    6.30
  -7 -12   0    0.70    0.50
   7  12   0    1.10    0.80
   7  12   0    0.60    0.60
   7  12   0    1.10    0.50
   7  12   0    1.80    0.80
   8  12   0   49.20    2.10
   8  12   0   52.39    2.90
   8  12   0   49.70    2.00
   8  12   0   45.30    2.80
   8  12   0   48.00    2.30
   9  12   0   21.60    1.40
   9  12   0   19.30    1.90
   9  12   0   17.10    1.20
   9  12   0   17.20    1.40
   9  12   0   18.40    1.90
  10  12   0   50.19    2.90
  10  12   0   48.00    2.00
  10  12   0   45.60    2.80
  10  12   0   51.79    2.20
  10  12   0   48.70    2.00
  11  12   0   79.49    3.90
  11  12   0   81.29    2.70
  11  12   0   77.79    2.60
  11  12   0   81.79    3.80
   3 -13   0    9.80    1.70
  -3  13   0    6.70    1.30
  -3  13   0    6.40    1.30
   2 -13   0   -0.30    0.90
  -2  13   0    0.40    0.80
  -2  13   0   -1.20    0.70
   1 -13   0   11.60    1.70
  -1  13   0   12.00    1.80
  -1  13   0    7.70    1.40
  -1  13   0    9.30    0.90
   0 -13   0   18.50    1.80
   0  13   0   12.80    1.60
   0  13   0   18.20    1.30
   0  13   0   19.80    1.90
  -1 -13   0   14.30    1.60
   1  13   0   15.00    1.60
   1  13   0   15.40    1.80
  -2 -13   0    3.50    0.90
  -2 -13   0    5.00    0.90
  -2 -13   0    3.30    0.90
   2  13   0    4.90    0.90
   2  13   0    3.30    0.90
   2  13   0    2.40    0.90
  -3 -13   0    7.50    1.00
  -3 -13   0    7.20    1.10
  -3 -13   0    5.70    1.00
   3  13   0    7.50    1.40
   3  13   0    6.40    1.00
   3  13   0    7.40    1.20
  -4 -13   0    5.20    0.80
  -4 -13   0    3.50    0.70
   4  13   0    5.20    1.20
   4  13   0    3.50    0.90
  -5 -13   0    3.70    0.60
  -5 -13   0    4.10    0.60
   5  13   0    4.30    1.10
   5  13   0    4.70    1.00
  -6 -13   0  127.19    4.00
   6  13   0  131.19    4.30
   6  13   0  134.69    4.10
   6  13   0  133.39    5.10
  -7 -13   0   15.60    1.20
   7  13   0   17.30    1.30
   7  13   0   17.20    1.90
   7  13   0   16.30    1.40
  -8 -13   0   -0.50    0.40
   8  13   0    1.40    0.70
   8  13   0   -0.40    0.40
   8  13   0    1.30    0.90
   8  13   0    0.40    0.50
   8  13   0    0.90    0.90
   9  13   0    0.30    1.10
   9  13   0    0.70    0.70
   9  13   0   -0.70    0.70
   9  13   0   -0.20    0.40
   9  13   0    0.30    0.60
  10  13   0   36.60    2.00
  10  13   0   38.80    2.70
  10  13   0   36.80    1.70
  10  13   0   34.50    2.60
   1 -14   0    0.30    1.00
  -1  14   0    0.40    1.00
  -1  14   0    1.00    1.10
   0 -14   0    8.80    1.50
   0  14   0    7.30    1.40
   0  14   0    9.10    2.00
  -1 -14   0   26.60    2.10
   1  14   0   28.80    1.70
   1  14   0   28.40    2.40
   1  14   0   27.80    2.20
  -2 -14   0   11.30    1.40
   2  14   0   15.30    2.20
   2  14   0   12.40    1.60
   2  14   0   10.50    1.70
  -3 -14   0   33.60    1.90
  -3 -14   0   36.10    1.90
   3  14   0   35.90    2.30
   3  14   0   33.20    2.50
  -4 -14   0    5.70    0.90
   4  14   0    3.80    1.10
   4  14   0    6.10    1.20
  -5 -14   0   15.70    1.30
  -5 -14   0   12.10    0.90
  -5 -14   0   15.70    1.00
   5  14   0   14.20    1.60
   5  14   0   12.60    1.80
  -6 -14   0   13.10    1.30
   6  14   0   15.70    1.60
  -7 -14   0    1.90    0.60
   7  14   0    3.00    1.20
   7  14   0    2.10    0.70
   7  14   0    1.10    1.00
   8  14   0    1.70    0.70
   8  14   0    0.60    1.00
   8  14   0    1.80    1.00
   8  14   0    2.00    0.70
   9  14   0    2.20    1.10
   9  14   0    4.10    0.80
   9  14   0    5.10    0.90
   9  14   0    3.20    1.10
  -2 -15   0    0.10    0.70
   2  15   0    3.00    1.10
   2  15   0    1.00    1.10
  -3 -15   0   22.30    1.60
   3  15   0   21.70    2.30
   3  15   0   19.70    1.90
  -4 -15   0    0.70    0.60
   4  15   0    1.80    0.90
   4  15   0   -1.10    0.70
  -5 -15   0    2.40    0.60
   5  15   0    1.40    1.10
   6  15   0    5.70    1.30
   6  15   0    3.60    1.20
   6  15  -1   12.20    1.90
   5  15  -1   17.70    2.20
   5  15  -1   17.30    2.70
  -5 -15   1   20.20    1.00
   4  15  -1    1.50    0.90
   4  15  -1    1.20    1.00
  -4 -15   1    1.10    0.60
  -4 -15   1    1.30    0.70
   3  15  -1    8.10    1.60
   3  15  -1    9.80    1.40
  -3 -15   1    8.10    1.10
   2  15  -1   35.20    2.40
   2  15  -1   33.90    2.70
  -2 -15   1   37.20    2.20
   8  14  -1   43.80    2.10
   8  14  -1   42.50    2.80
   8  14  -1   39.30    2.90
   8  14  -1   40.80    2.10
  -8 -14   1   37.50    2.10
   7  14  -1    1.60    0.70
   7  14  -1   -1.10    0.60
   7  14  -1    0.40    0.50
  -7 -14   1   -0.50    0.50
   6  14  -1   -0.10    0.60
   6  14  -1   -0.80    0.80
   6  14  -1   -0.40    0.60
  -6 -14   1    0.70    0.60
   5  14  -1    4.60    1.10
   5  14  -1    4.20    1.60
  -5 -14   1    4.70    0.60
  -5 -14   1    3.80    0.50
   4  14  -1   -0.30    0.70
   4  14  -1   -0.10    0.70
  -4 -14   1    0.30    0.50
   3  14  -1    7.80    1.30
   3  14  -1    4.10    1.10
  -3 -14   1    5.40    0.90
   2  14  -1    1.20    0.90
   2  14  -1    1.50    1.00
  -2 -14   1    0.80    0.80
   1  14  -1   38.10    2.70
   1  14  -1   36.10    2.00
   1  14  -1   30.90    2.50
  -1 -14   1   33.20    2.20
   0  14  -1    0.70    0.90
   0  14  -1   -0.10    0.90
   0 -14   1    1.60    0.90
  -1  14  -1   87.49    6.10
   1 -14   1   98.39    4.10
  10  13  -1   18.80    2.10
  10  13  -1   18.70    2.20
  10  13  -1   20.10    1.50
   9  13  -1    8.00    1.20
   9  13  -1    8.50    1.60
   9  13  -1   12.30    1.20
   9  13  -1   11.30    1.70
   9  13  -1   13.50    1.30
   8  13  -1   14.00    1.30
   8  13  -1   17.60    1.60
   8  13  -1   10.00    1.50
   8  13  -1   14.60    1.20
   8  13  -1   11.40    1.70
   7  13  -1    3.60    0.80
   7  13  -1    6.10    1.00
   7  13  -1    4.90    1.20
   6  13  -1    4.50    0.90
   6  13  -1    3.00    0.80
   6  13  -1    2.90    1.00
   5  13  -1    3.10    0.90
   5  13  -1    2.90    0.80
   5  13  -1    3.20    1.10
  -5 -13   1    3.00    0.50
  -5 -13   1    1.60    0.50
  -5 -13   1    3.30    0.80
   4  13  -1    5.80    1.30
   4  13  -1    5.70    1.10
  -4 -13   1    5.40    0.80
  -4 -13   1    7.30    1.00
  -4 -13   1    4.90    0.70
   3  13  -1   14.20    1.80
   3  13  -1   17.40    1.50
   3  13  -1   17.70    1.60
  -3 -13   1   17.80    1.50
  -3 -13   1   18.40    1.40
  -3 -13   1   18.90    1.30
   2  13  -1    2.30    0.90
   2  13  -1    2.90    1.00
   2  13  -1    3.00    0.80
  -2 -13   1    5.20    0.90
  -2 -13   1    2.60    0.80
   1  13  -1    3.10    1.00
   1  13  -1    1.60    0.90
  -1 -13   1    1.90    0.90
   0  13  -1   90.69    3.90
   0  13  -1   90.79    3.70
   0  13  -1   88.79    3.10
   0 -13   1   91.29    3.70
  -1  13  -1    0.60    0.90
  -1  13  -1    0.00    0.50
  -1  13  -1   -1.40    0.70
   1 -13   1   -0.30    0.80
  -2  13  -1    0.30    0.90
  -2  13  -1   -0.20    0.80
   2 -13   1    1.80    1.20
  -3  13  -1   14.30    1.80
  -3  13  -1   18.60    2.00
   3 -13   1   13.40    1.80
  10  12  -1   95.99    4.20
  10  12  -1   93.19    3.00
  10  12  -1   98.59    4.20
  10  12  -1   95.79    3.20
  10  12  -1   88.69    3.20
   9  12  -1   57.49    2.20
   9  12  -1   59.69    2.30
   9  12  -1   53.29    3.00
   9  12  -1   53.89    2.40
   9  12  -1   58.89    3.20
   8  12  -1   16.80    1.20
   8  12  -1   19.00    1.40
   8  12  -1   19.80    1.90
   8  12  -1   17.50    1.30
   7  12  -1   14.70    1.20
   7  12  -1   16.70    1.80
   7  12  -1   14.10    1.40
   7  12  -1   15.90    1.20
  -7 -12   1   13.70    1.20
   6  12  -1    8.50    1.00
   6  12  -1    6.40    1.20
   6  12  -1    8.70    1.10
  -6 -12   1    8.20    1.10
   5  12  -1    0.50    0.60
   5  12  -1    0.10    0.70
   5  12  -1   -0.50    0.40
  -5 -12   1    1.00    0.50
  -5 -12   1   -0.10    0.20
  -5 -12   1    0.10    0.30
   4  12  -1   -0.20    0.60
   4  12  -1    0.10    0.40
   4  12  -1    0.30    0.60
   4  12  -1    0.00    0.50
   4  12  -1    0.70    0.80
  -4 -12   1    0.40    0.40
  -4 -12   1   -0.40    0.40
   3  12  -1    1.60    0.80
   3  12  -1    0.30    0.30
   3  12  -1    0.70    0.80
   3  12  -1    1.80    0.70
  -3 -12   1    0.80    0.50
  -3 -12   1    0.70    0.60
   2  12  -1   16.40    1.60
   2  12  -1   19.30    1.80
  -2 -12   1   18.60    1.50
  -2 -12   1   16.60    1.30
   1  12  -1    8.00    1.20
   1  12  -1   10.50    1.10
   1  12  -1   11.40    1.40
  -1 -12   1   10.70    1.30
  -1 -12   1   13.30    1.20
  -1 -12   1   11.70    1.20
   0  12  -1   58.69    2.40
   0  12  -1   60.39    2.80
   0  12  -1   60.49    3.00
   0 -12   1   58.79    2.80
   0 -12   1   62.29    3.50
  -1  12  -1   13.20    1.70
  -1  12  -1   11.90    1.50
  -1  12  -1   16.10    1.10
   1 -12   1   15.10    1.60
  -2  12  -1    0.30    0.70
  -2  12  -1   -0.30    0.70
   2 -12   1    0.10    0.90
  -3  12  -1   11.30    1.50
  -3  12  -1   15.40    1.70
   3 -12   1   12.70    1.70
  -4  12  -1    4.80    1.20
  -4  12  -1    4.20    1.00
   4 -12   1    5.10    1.30
  11  11  -1    1.10    0.50
  11  11  -1    1.50    0.50
  11  11  -1    1.30    0.80
  11  11  -1    1.10    0.80
  11  11  -1    0.30    0.50
  10  11  -1   11.10    1.10
  10  11  -1    9.90    1.00
  10  11  -1   11.00    0.90
  10  11  -1   10.90    1.60
  10  11  -1   10.40    1.50
   9  11  -1    6.50    0.90
   9  11  -1    2.60    0.90
   9  11  -1    4.20    0.70
   9  11  -1    4.50    1.10
   9  11  -1    3.70    0.70
   8  11  -1    2.00    0.80
   8  11  -1    2.80    0.60
   8  11  -1    3.10    0.80
   8  11  -1    3.50    0.70
   7  11  -1    4.80    0.80
   7  11  -1    5.00    0.90
   7  11  -1    2.80    0.60
   7  11  -1    3.80    1.10
  -7 -11   1    4.00    0.80
   6  11  -1    0.60    0.60
   6  11  -1   -0.20    0.40
   6  11  -1   -0.30    0.60
   6  11  -1    0.10    0.60
   6  11  -1    0.30    0.50
  -6 -11   1   -0.60    0.30
   5  11  -1   15.00    1.30
   5  11  -1   11.10    1.30
   5  11  -1   12.60    1.10
   5  11  -1   16.20    1.50
   5  11  -1   13.00    1.60
  -5 -11   1   10.90    1.10
  -5 -11   1   12.60    0.60
  -5 -11   1   12.40    0.60
   4  11  -1    5.70    0.90
   4  11  -1    6.60    1.10
   4  11  -1    5.90    1.00
   4  11  -1    5.10    0.80
  -4 -11   1    7.10    0.80
  -4 -11   1    6.20    0.90
  -4 -11   1    5.40    0.70
   3  11  -1    0.50    0.70
   3  11  -1    0.10    0.70
   3  11  -1    0.80    0.60
   3  11  -1    1.60    0.60
   3  11  -1    1.10    0.60
  -3 -11   1    1.70    0.60
  -3 -11   1    1.30    0.50
  -3 -11   1    0.90    0.60
  -3 -11   1    0.70    0.50
   2  11  -1   13.60    1.40
   2  11  -1   12.30    1.50
   2  11  -1   15.80    2.20
   2  11  -1   12.20    1.20
  -2 -11   1   14.50    1.20
  -2 -11   1   13.00    1.20
  -2 -11   1   14.00    1.30
  -2 -11   1   14.60    1.50
   1  11  -1   48.30    2.30
   1  11  -1   43.70    2.40
   1  11  -1   46.50    2.10
   1  11  -1   47.60    2.50
  -1 -11   1   44.70    2.50
  -1 -11   1   47.50    2.10
  -1 -11   1   45.70    2.30
   0  11  -1   56.49    2.70
   0  11  -1   54.09    2.20
   0  11  -1   55.09    2.60
   0 -11   1   52.09    2.70
   0 -11   1   54.49    2.60
  -1  11  -1   77.39    3.20
  -1  11  -1   78.19    3.30
   1 -11   1   78.09    3.30
   1 -11   1   76.99    3.30
   1 -11   1   75.09    3.00
   1 -11   1   72.79    3.00
  -2  11  -1   43.80    2.40
  -2  11  -1   37.80    2.20
  -2  11  -1   41.70    2.40
  -2  11  -1   42.00    1.60
   2 -11   1   40.90    2.40
   2 -11   1   42.90    2.50
  -3  11  -1   18.00    1.70
  -3  11  -1   15.50    1.50
  -3  11  -1   14.50    1.60
   3 -11   1   15.20    1.80
   3 -11   1   15.20    1.60
  -4  11  -1   20.60    1.80
  -4  11  -1   18.50    1.70
  -4  11  -1   17.00    1.50
   4 -11   1   19.00    1.70
   4 -11   1   20.90    2.10
  -5  11  -1    0.20    0.80
  -5  11  -1    0.90    0.60
  -5  11  -1    0.80    0.60
   5 -11   1    1.00    1.00
  12  10  -1    9.20    1.30
  12  10  -1   12.40    1.00
  12  10  -1    7.90    1.30
  11  10  -1    3.90    1.00
  11  10  -1    6.90    0.70
  11  10  -1    3.50    1.00
  11  10  -1    4.00    0.70
  10  10  -1    8.60    1.00
  10  10  -1   10.00    0.80
  10  10  -1    7.10    1.20
  10  10  -1   10.60    0.90
  10  10  -1    9.70    1.40
   9  10  -1    5.70    1.10
   9  10  -1    6.10    0.80
   9  10  -1    4.90    1.10
   9  10  -1    7.40    0.80
   8  10  -1   29.10    1.50
   8  10  -1   30.20    1.40
   8  10  -1   29.50    2.00
   8  10  -1   31.20    1.50
   8  10  -1   32.40    2.10
   7  10  -1   11.90    1.00
   7  10  -1   10.60    1.10
   7  10  -1   13.40    1.00
   7  10  -1   13.60    1.50
  -7 -10   1   11.30    1.00
   6  10  -1   19.70    1.30
   6  10  -1   20.30    1.40
   6  10  -1   18.40    1.20
  -6 -10   1   17.40    1.20
   5  10  -1  195.58    5.10
   5  10  -1  202.28    5.90
   5  10  -1  196.28    5.10
   5  10  -1  186.78    5.30
  -5 -10   1  192.48    5.10
   4  10  -1  194.48    5.60
   4  10  -1  196.88    5.10
   4  10  -1  197.38    5.20
   4  10  -1  192.28    5.40
   4  10  -1  191.78    5.80
  -4 -10   1  189.98    4.60
  -4 -10   1  197.18    4.70
  -4 -10   1  189.38    5.10
   3  10  -1   67.49    2.90
   3  10  -1   68.49    2.70
   3  10  -1   67.79    2.50
   3  10  -1   68.19    2.70
   3  10  -1   64.59    2.40
  -3 -10   1   66.69    2.30
  -3 -10   1   63.79    2.20
  -3 -10   1   60.69    2.40
   2  10  -1   97.79    3.30
   2  10  -1   96.49    3.60
   2  10  -1   89.39    3.10
   2  10  -1   95.49    3.20
   2  10  -1   95.49    3.40
  -2 -10   1   93.19    3.00
  -2 -10   1   94.69    3.10
  -2 -10   1   89.19    3.60
  -2 -10   1   95.79    3.10
   1  10  -1    7.10    1.10
   1  10  -1    6.70    1.00
   1  10  -1    7.00    0.90
   1  10  -1    6.50    1.10
  -1 -10   1    6.40    0.90
  -1 -10   1    9.30    1.10
  -1 -10   1    6.30    1.00
  -1 -10   1    7.10    1.10
   0  10  -1   16.30    1.40
   0  10  -1   14.10    1.40
   0  10  -1   15.00    1.10
   0 -10   1   17.20    1.30
   0 -10   1   17.80    1.50
   0 -10   1   17.50    1.40
   0 -10   1   14.10    1.50
  -1  10  -1    1.60    0.70
  -1  10  -1    2.50    0.80
  -1  10  -1    2.20    0.60
   1 -10   1    1.70    0.70
   1 -10   1    2.20    1.00
  -2  10  -1  192.48    5.60
  -2  10  -1  187.88    4.60
  -2  10  -1  186.48    5.80
  -2  10  -1  189.98    5.60
   2 -10   1  186.18    5.70
   2 -10   1  191.28    5.60
   2 -10   1  195.28    5.80
   2 -10   1  193.38    5.60
  -3  10  -1   10.00    1.20
  -3  10  -1   12.40    1.30
  -3  10  -1   13.20    1.50
   3 -10   1   12.30    1.60
   3 -10   1   12.10    1.30
  -4  10  -1   -0.20    0.50
  -4  10  -1    0.30    0.70
  -4  10  -1    0.40    0.70
   4 -10   1    0.30    0.50
   4 -10   1    0.00    0.80
  -5  10  -1    1.80    0.70
  -5  10  -1    0.10    0.70
  -5  10  -1    2.30    0.70
   5 -10   1    0.80    1.00
   5 -10   1    1.80    0.80
  -6  10  -1    2.40    1.00
  -6  10  -1    5.10    0.90
  -6  10  -1    4.20    1.00
   6 -10   1    4.30    1.30
   6 -10   1    5.50    1.10
  -7  10  -1   26.70    1.90
   7 -10   1   27.40    2.80
  12   9  -1    7.40    1.20
  12   9  -1    7.00    0.90
  12   9  -1    6.90    1.20
  11   9  -1   10.30    0.60
  11   9  -1   10.40    0.70
  11   9  -1    8.40    1.30
  11   9  -1   10.00    1.40
  11   9  -1    9.20    1.00
  10   9  -1   80.69    3.30
  10   9  -1   71.09    2.20
  10   9  -1   70.39    2.00
  10   9  -1   76.79    3.30
  10   9  -1   74.49    2.60
   9   9  -1   32.30    1.60
   9   9  -1   31.80    2.10
   9   9  -1   32.20    1.40
   9   9  -1   33.70    2.10
   9   9  -1   34.10    1.30
   8   9  -1    2.00    0.80
   8   9  -1    4.10    0.90
   8   9  -1    2.70    0.60
   8   9  -1    3.50    0.70
   8   9  -1    3.40    0.90
   8   9  -1    2.20    0.50
   7   9  -1   10.50    1.00
   7   9  -1   10.50    0.90
   7   9  -1   11.30    1.00
   7   9  -1    9.50    1.20
   6   9  -1    1.10    0.50
   6   9  -1    0.50    0.60
   6   9  -1    1.60    0.60
   6   9  -1    1.40    0.50
  -6  -9   1    0.30    0.40
   5   9  -1    3.90    0.70
   5   9  -1    3.10    0.70
   5   9  -1    3.10    0.80
   5   9  -1    4.10    0.70
   5   9  -1    2.50    0.80
  -5  -9   1    4.40    0.80
   4   9  -1   26.40    1.40
   4   9  -1   26.90    1.50
   4   9  -1   23.20    1.60
   4   9  -1   25.30    1.40
   4   9  -1   28.50    1.80
  -4  -9   1   23.30    1.30
  -4  -9   1   25.60    1.00
  -4  -9   1   25.50    1.10
   3   9  -1  896.21   19.80
   3   9  -1  934.21   19.70
   3   9  -1  928.81   19.60
   3   9  -1  915.21   20.30
   3   9  -1  926.11   20.00
  -3  -9   1  914.71   19.30
  -3  -9   1  902.71   19.20
  -3  -9   1  917.21   19.60
  -3  -9   1  904.31   20.30
   2   9  -1  783.82   17.30
   2   9  -1  808.82   17.60
   2   9  -1  792.42   17.00
   2   9  -1  791.42   17.20
   2   9  -1  774.02   17.10
  -2  -9   1  721.23   17.50
  -2  -9   1  805.12   16.90
  -2  -9   1  780.92   16.90
  -2  -9   1  787.82   17.70
   1   9  -1   44.60    1.90
   1   9  -1   42.80    1.90
   1   9  -1   42.60    2.10
   1   9  -1   41.70    2.00
   1   9  -1   41.70    2.10
  -1  -9   1   39.90    1.80
  -1  -9   1   39.90    1.80
  -1  -9   1   41.60    2.20
  -1  -9   1   40.00    1.90
   0   9  -1  366.46    8.70
   0   9  -1  357.16    8.80
   0   9  -1  349.96    8.80
   0   9  -1  354.06    8.30
   0  -9   1  360.76    8.70
   0  -9   1  361.06    8.50
   0  -9   1  354.16    8.50
   0  -9   1  340.97    8.90
  -1   9  -1   24.40    1.60
  -1   9  -1   22.30    1.60
  -1   9  -1   24.70    1.20
   1  -9   1   20.30    1.60
   1  -9   1   22.10    1.70
   1  -9   1   23.40    1.50
   1  -9   1   23.20    1.50
  -2   9  -1   33.30    1.90
  -2   9  -1   37.30    1.40
  -2   9  -1   39.80    2.00
   2  -9   1   37.20    2.20
   2  -9   1   38.70    2.10
  -3   9  -1  122.69    3.90
  -3   9  -1  120.79    4.00
  -3   9  -1  123.39    3.90
   3  -9   1  119.29    4.00
   3  -9   1  120.29    4.20
  -4   9  -1   69.09    2.70
  -4   9  -1   73.09    3.20
  -4   9  -1   75.99    3.00
  -4   9  -1   76.69    2.90
   4  -9   1   74.09    3.30
   4  -9   1   70.99    2.90
  -5   9  -1   16.20    1.30
  -5   9  -1   17.30    1.60
  -5   9  -1   14.70    1.30
  -5   9  -1   17.80    1.50
   5  -9   1   17.30    1.80
   5  -9   1   13.90    1.30
  -6   9  -1    7.20    1.00
  -6   9  -1    5.90    0.90
  -6   9  -1    6.70    1.10
   6  -9   1    4.70    1.30
   6  -9   1    6.20    0.90
  -7   9  -1   20.40    1.30
  -7   9  -1   20.00    1.60
   7  -9   1   20.20    1.50
  -8   9  -1    5.80    1.10
   8  -9   1    5.60    1.50
  12   8  -1    2.90    0.70
  12   8  -1    2.80    0.80
  12   8  -1    4.20    0.90
  11   8  -1   19.00    1.30
  11   8  -1   20.30    1.60
  11   8  -1   17.60    1.50
  10   8  -1    2.30    0.40
  10   8  -1    0.80    0.70
  10   8  -1    2.60    0.60
  10   8  -1    0.80    0.60
  10   8  -1    1.90    0.30
   9   8  -1    0.20    0.50
   9   8  -1    0.00    0.30
   9   8  -1    0.10    0.50
   9   8  -1    0.30    0.30
   9   8  -1    0.30    0.50
   9   8  -1    0.50    0.40
   8   8  -1  142.09    3.40
   8   8  -1  139.19    3.90
   8   8  -1  142.99    4.40
   8   8  -1  139.69    3.50
   8   8  -1  124.39    4.90
   8   8  -1  135.59    4.50
   7   8  -1   14.20    1.00
   7   8  -1   14.00    0.90
   7   8  -1   14.40    1.40
   7   8  -1   14.50    0.80
   6   8  -1    2.40    0.70
   6   8  -1    2.90    0.60
   6   8  -1    3.50    0.60
  -6  -8   1    3.60    0.60
   5   8  -1   65.09    2.10
   5   8  -1   69.29    2.20
   5   8  -1   65.69    2.70
   5   8  -1   64.69    2.20
   5   8  -1   64.69    2.60
  -5  -8   1   66.59    2.20
   4   8  -1  310.27    7.90
   4   8  -1  318.77    7.80
   4   8  -1  316.07    7.30
   4   8  -1  312.17    7.30
   4   8  -1  314.37    7.40
  -4  -8   1  308.57    6.70
  -4  -8   1  313.37    7.30
  -4  -8   1  316.67    6.70
   3   8  -1    8.50    1.00
   3   8  -1   11.40    0.90
   3   8  -1    8.90    0.90
   3   8  -1    9.90    1.00
   3   8  -1   12.20    1.30
  -3  -8   1   10.70    0.90
  -3  -8   1   10.60    0.70
  -3  -8   1   10.50    1.10
   2   8  -1  350.96    8.40
   2   8  -1  364.26    8.80
   2   8  -1  367.66    8.60
   2   8  -1  348.67    8.30
  -2  -8   1  363.76    8.90
  -2  -8   1  375.36    8.30
  -2  -8   1  362.86    8.30
  -2  -8   1  357.06    8.20
   1   8  -1  129.09    3.90
   1   8  -1  133.69    4.10
   1   8  -1  131.19    3.70
   1   8  -1  129.29    3.80
   1   8  -1  131.79    3.70
  -1  -8   1  127.69    4.10
  -1  -8   1  133.09    3.70
  -1  -8   1  133.49    3.80
  -1  -8   1  134.39    4.10
   0   8  -1   -0.10    0.50
   0   8  -1    0.70    0.50
   0   8  -1    0.00    0.40
   0   8  -1    0.00    0.40
   0  -8   1    0.50    0.60
   0  -8   1   -0.10    0.40
   0  -8   1    0.20    0.40
   0  -8   1   -0.10    0.30
  -1   8  -1    9.20    1.10
  -1   8  -1    5.90    1.00
  -1   8  -1    6.70    0.90
  -1   8  -1    6.80    0.70
   1  -8   1    8.60    1.20
   1  -8   1    8.10    1.00
   1  -8   1    6.70    0.90
   1  -8   1    6.50    0.90
  -2   8  -1   44.30    2.20
  -2   8  -1   45.70    2.10
  -2   8  -1   45.80    1.50
  -2   8  -1   45.70    2.10
   2  -8   1   42.50    2.00
   2  -8   1   49.70    2.20
   2  -8   1   43.80    2.00
   2  -8   1   44.20    2.20
  -3   8  -1  209.08    5.60
  -3   8  -1  211.18    5.70
  -3   8  -1  210.98    5.50
  -3   8  -1  205.88    5.90
   3  -8   1  212.28    6.00
   3  -8   1  200.48    5.60
  -4   8  -1   10.40    1.20
  -4   8  -1   11.40    1.30
  -4   8  -1   10.50    1.10
   4  -8   1   11.00    1.10
   4  -8   1   12.10    1.70
  -5   8  -1   12.00    1.20
  -5   8  -1   10.90    1.10
   5  -8   1    9.80    1.40
   5  -8   1   11.10    1.10
   5  -8   1   12.50    1.40
  -6   8  -1    4.20    0.90
  -6   8  -1    3.50    0.70
  -6   8  -1    3.80    0.70
  -6   8  -1    4.40    1.00
   6  -8   1    4.00    1.10
   6  -8   1    3.30    0.70
  -7   8  -1    6.60    1.10
  -7   8  -1    3.10    0.90
  -7   8  -1    4.80    0.70
   7  -8   1    4.00    1.10
   7  -8   1    4.20    0.80
  -8   8  -1   14.90    1.40
  -8   8  -1   17.70    1.40
  -8   8  -1   12.60    1.00
   8  -8   1   13.10    1.20
   8  -8   1   17.20    2.70
  13   7  -1   -0.40    0.50
  13   7  -1    0.30    0.50
  13   7  -1    0.10    0.40
  12   7  -1    2.30    0.70
  12   7  -1    0.80    0.60
  12   7  -1    1.80    0.60
  11   7  -1   -0.40    0.50
  11   7  -1    0.00    0.40
  11   7  -1   -0.10    0.50
  10   7  -1   94.59    3.10
  10   7  -1   93.99    3.70
  10   7  -1   92.79    3.40
  10   7  -1   95.29    3.40
   9   7  -1   41.90    2.30
   9   7  -1   44.40    2.20
   9   7  -1   41.60    2.10
   9   7  -1   44.10    1.90
   8   7  -1  133.69    4.20
   8   7  -1  131.69    4.10
   8   7  -1  129.69    3.70
   8   7  -1  128.89    3.10
   8   7  -1  131.49    3.00
   8   7  -1  131.69    4.30
   7   7  -1    4.40    0.80
   7   7  -1    4.50    0.50
   7   7  -1    4.30    0.50
   7   7  -1    4.00    0.60
   7   7  -1    4.60    1.00
   6   7  -1   20.80    0.90
   6   7  -1   21.60    1.10
   6   7  -1   20.30    1.00
   6   7  -1   20.50    1.40
   6   7  -1   18.50    1.40
   5   7  -1    5.90    1.00
   5   7  -1    4.50    0.50
   5   7  -1    4.20    0.60
   5   7  -1    4.50    0.60
   5   7  -1    3.60    0.70
  -5  -7   1    4.30    0.60
   4   7  -1    8.40    0.70
   4   7  -1    8.80    1.10
   4   7  -1    8.50    0.70
   4   7  -1    8.70    0.80
  -4  -7   1    7.90    0.70
   3   7  -1  222.88    5.70
   3   7  -1  213.58    5.30
   3   7  -1  219.58    5.40
   3   7  -1  215.58    5.20
   3   7  -1  217.38    5.80
  -3  -7   1  226.48    5.90
  -3  -7   1  222.98    5.00
  -3  -7   1  223.58    5.30
   2   7  -1   48.40    1.90
   2   7  -1   46.00    1.90
   2   7  -1   47.10    1.70
   2   7  -1   48.30    2.10
   2   7  -1   49.70    1.80
  -2  -7   1   50.99    1.70
  -2  -7   1   48.20    1.70
  -2  -7   1   51.79    1.70
   1   7  -1   32.40    1.50
   1   7  -1   35.90    1.50
   1   7  -1   33.10    1.60
   1   7  -1   33.40    1.50
   1   7  -1   35.80    1.70
  -1  -7   1   35.70    1.50
  -1  -7   1   32.60    1.40
  -1  -7   1   35.70    1.50
  -1  -7   1   35.30    1.80
   0   7  -1   10.20    0.90
   0   7  -1   11.50    1.10
   0   7  -1   12.30    0.90
   0   7  -1   12.00    1.00
   0   7  -1   12.50    1.10
   0  -7   1   12.90    1.10
   0  -7   1   12.00    0.90
   0  -7   1   13.20    1.00
   0  -7   1   11.70    1.10
  -1   7  -1   25.70    1.40
  -1   7  -1   24.30    1.50
  -1   7  -1   28.40    1.50
  -1   7  -1   26.70    1.10
   1  -7   1   25.60    1.40
   1  -7   1   27.90    1.50
   1  -7   1   27.60    1.40
   1  -7   1   26.60    1.50
  -2   7  -1  180.98    4.10
  -2   7  -1  173.08    5.00
  -2   7  -1  177.98    4.80
  -2   7  -1  181.38    4.80
   2  -7   1  176.78    5.00
   2  -7   1  174.78    4.80
   2  -7   1  175.28    4.80
   2  -7   1  178.48    4.80
  -3   7  -1   -0.50    0.40
  -3   7  -1    0.50    0.60
  -3   7  -1   -0.20    0.50
  -3   7  -1    0.00    0.50
   3  -7   1   -0.20    0.60
   3  -7   1   -0.20    0.40
   3  -7   1    0.10    0.40
   3  -7   1   -0.40    0.40
  -4   7  -1   12.40    1.20
  -4   7  -1   13.40    1.30
  -4   7  -1   11.80    1.10
  -4   7  -1   11.60    1.00
   4  -7   1   12.20    1.40
  -5   7  -1   51.99    2.30
  -5   7  -1   52.99    2.10
  -5   7  -1   51.69    2.40
  -5   7  -1   54.29    2.10
   5  -7   1   54.39    2.20
   5  -7   1   49.70    2.60
  -6   7  -1    0.80    0.60
  -6   7  -1    0.50    0.50
  -6   7  -1    0.30    0.60
  -6   7  -1   -0.10    0.50
   6  -7   1    0.30    0.60
   6  -7   1    0.00    0.70
   6  -7   1   -0.50    0.40
   6  -7   1    0.50    0.50
  -7   7  -1    4.90    0.70
  -7   7  -1    4.00    0.80
  -7   7  -1    3.70    0.80
   7  -7   1    2.60    0.60
   7  -7   1    4.50    1.20
  -8   7  -1    8.10    0.80
  -8   7  -1    8.00    1.00
  -8   7  -1    8.10    1.10
   8  -7   1    7.90    1.20
   8  -7   1    6.30    1.30
  -9   7  -1   13.00    1.20
  -9   7  -1   14.50    1.20
   9  -7   1    9.50    1.70
   9  -7   1   12.00    0.90
  13   6  -1    3.00    0.70
  13   6  -1    1.70    0.60
  13   6  -1    2.70    0.70
  12   6  -1    2.20    0.70
  12   6  -1    2.80    0.70
  12   6  -1    3.00    0.70
  11   6  -1    2.80    0.70
  11   6  -1    4.20    0.80
  11   6  -1    3.80    1.10
  11   6  -1    3.70    0.70
  10   6  -1   -0.60    0.40
  10   6  -1   -0.10    0.30
  10   6  -1   -0.40    0.60
  10   6  -1   -0.50    0.40
   9   6  -1    9.10    1.10
   9   6  -1    8.00    0.90
   9   6  -1    6.00    0.90
   9   6  -1    6.40    1.00
   8   6  -1   28.30    1.60
   8   6  -1   26.00    1.70
   8   6  -1   26.90    1.60
   8   6  -1   26.80    1.40
   7   6  -1    1.20    0.50
   7   6  -1    1.00    0.20
   7   6  -1    0.60    0.40
   7   6  -1    0.90    0.50
   7   6  -1    0.40    0.50
   7   6  -1    0.60    0.20
   6   6  -1   97.89    3.30
   6   6  -1   98.49    2.40
   6   6  -1   93.19    3.20
   6   6  -1  100.49    2.80
   6   6  -1   95.89    2.30
   5   6  -1   20.40    0.90
   5   6  -1   20.00    1.00
   5   6  -1   19.60    1.30
   5   6  -1   20.80    0.80
  -5  -6   1   21.40    1.10
   4   6  -1   15.50    1.10
   4   6  -1   15.10    0.90
   4   6  -1   14.60    0.80
   4   6  -1   15.50    1.10
   4   6  -1   15.60    0.80
  -4  -6   1   15.40    0.90
   3   6  -1  180.68    4.50
   3   6  -1  188.28    4.40
   3   6  -1  182.78    4.50
   3   6  -1  182.58    4.90
  -3  -6   1  187.08    4.20
  -3  -6   1  193.08    5.00
  -3  -6   1  194.88    4.50
  -3  -6   1  190.08    4.20
   2   6  -1  130.39    3.40
   2   6  -1  135.19    3.60
   2   6  -1  130.99    3.40
   2   6  -1  125.59    3.50
   2   6  -1  133.49    3.80
  -2  -6   1  134.19    3.30
  -2  -6   1  125.59    3.70
  -2  -6   1  135.59    3.40
  -2  -6   1  135.09    3.30
   1   6  -1   32.00    1.50
   1   6  -1   35.20    1.40
   1   6  -1   32.20    1.50
   1   6  -1   32.30    1.30
   1   6  -1   31.90    1.40
  -1  -6   1   32.90    1.30
  -1  -6   1   33.20    1.60
  -1  -6   1   33.70    1.30
  -1  -6   1   32.60    1.60
   0   6  -1   11.60    0.90
   0   6  -1    9.80    0.90
   0   6  -1   10.00    0.80
   0   6  -1   10.70    0.90
   0   6  -1   12.00    0.80
   0  -6   1    9.80    0.90
   0  -6   1   10.00    0.90
   0  -6   1   11.80    0.80
   0  -6   1   10.80    0.80
  -1   6  -1    3.70    0.60
  -1   6  -1    4.30    0.70
  -1   6  -1    4.00    0.60
  -1   6  -1    4.60    0.50
   1  -6   1    3.90    0.70
   1  -6   1    3.20    0.60
   1  -6   1    2.90    0.50
   1  -6   1    4.80    0.70
  -2   6  -1   22.20    1.40
  -2   6  -1   23.90    1.30
  -2   6  -1   24.60    0.90
  -2   6  -1   25.20    1.30
   2  -6   1   24.40    1.30
   2  -6   1   22.80    1.30
   2  -6   1   23.80    1.30
   2  -6   1   21.90    1.40
  -3   6  -1   77.39    2.60
  -3   6  -1   76.89    2.50
  -3   6  -1   75.59    2.70
  -3   6  -1   78.89    2.50
   3  -6   1   74.79    2.80
   3  -6   1   76.89    2.60
   3  -6   1   75.09    2.50
   3  -6   1   75.09    2.60
  -4   6  -1   23.40    1.50
  -4   6  -1   23.50    1.30
  -4   6  -1   23.40    1.30
  -4   6  -1   24.90    1.50
   4  -6   1   23.60    1.40
   4  -6   1   24.60    1.30
   4  -6   1   22.60    1.40
   4  -6   1   22.80    1.60
  -5   6  -1   37.90    2.00
  -5   6  -1   42.00    1.70
  -5   6  -1   43.10    1.90
  -5   6  -1   41.30    1.70
   5  -6   1   44.30    2.20
   5  -6   1   42.40    1.80
   5  -6   1   39.20    2.00
  -6   6  -1   14.70    1.20
  -6   6  -1   17.00    1.10
  -6   6  -1   16.00    1.00
  -6   6  -1   15.70    1.30
   6  -6   1   14.90    1.50
   6  -6   1   16.00    1.10
   6  -6   1   14.60    1.40
  -7   6  -1   69.99    2.60
  -7   6  -1   70.59    2.20
  -7   6  -1   63.89    2.60
   7  -6   1   80.69    3.20
   7  -6   1   67.99    2.40
   7  -6   1   69.39    2.80
  -8   6  -1    3.90    0.80
  -8   6  -1    3.20    0.50
  -8   6  -1    2.40    0.70
   8  -6   1    4.40    1.10
   8  -6   1    3.40    0.60
  -9   6  -1   49.60    2.00
  -9   6  -1   53.29    2.10
   9  -6   1   46.20    2.80
   9  -6   1   47.40    1.70
 -10   6  -1   43.40    1.70
  10  -6   1   46.10    4.20
  13   5  -1    9.10    1.20
  13   5  -1    8.30    0.90
  13   5  -1    7.30    1.00
  12   5  -1   -0.50    0.40
  12   5  -1   -0.10    0.50
  12   5  -1    0.70    0.50
  11   5  -1    4.90    0.90
  11   5  -1    2.40    0.70
  11   5  -1    2.70    0.70
  11   5  -1    2.90    0.80
  10   5  -1   10.10    1.30
  10   5  -1    8.50    1.00
  10   5  -1    7.70    1.00
  10   5  -1    8.10    1.00
   9   5  -1   16.20    1.40
   9   5  -1   15.20    1.30
   9   5  -1   15.90    1.20
   9   5  -1   18.50    1.20
   8   5  -1  232.08    5.70
   8   5  -1  219.98    6.00
   8   5  -1  227.28    5.80
   8   5  -1  226.98    6.00
   7   5  -1  440.26   10.30
   7   5  -1  445.36   10.10
   7   5  -1  445.36    9.90
   7   5  -1  437.36   10.40
   6   5  -1    7.40    0.80
   6   5  -1    6.80    0.70
   6   5  -1    4.90    0.70
   5   5  -1   50.69    2.00
   5   5  -1   51.89    1.30
   5   5  -1   49.30    2.00
   5   5  -1   53.29    1.40
   5   5  -1   52.99    1.70
   4   5  -1   33.50    1.60
   4   5  -1   34.70    1.10
   4   5  -1   35.00    1.10
   4   5  -1   33.80    1.30
   4   5  -1   33.00    1.50
  -4  -5   1   35.10    1.60
  -4  -5   1   36.30    1.30
   3   5  -1 1788.82  117.09
  -3  -5   1 1444.46  106.19
   2   5  -1    1.10    0.30
   2   5  -1    1.00    0.40
   2   5  -1    0.90    0.30
   2   5  -1    0.50    0.40
  -2  -5   1    1.10    0.30
  -2  -5   1    1.20    0.30
  -2  -5   1    1.10    0.50
  -2  -5   1    1.00    0.30
  -2  -5   1    0.40    0.30
   1   5  -1   43.70    1.50
   1   5  -1   44.50    1.70
   1   5  -1   40.20    1.60
   1   5  -1   42.00    1.50
   1   5  -1   45.10    1.60
  -1  -5   1   44.70    1.50
  -1  -5   1   45.70    1.70
  -1  -5   1   45.10    1.50
  -1  -5   1   44.90    1.50
  -1  -5   1   43.30    1.60
   0   5  -1    3.50    0.60
   0   5  -1    2.40    0.40
   0   5  -1    2.40    0.40
   0   5  -1    2.80    0.50
   0  -5   1    2.00    0.50
   0  -5   1    2.50    0.40
   0  -5   1    2.20    0.50
   0  -5   1    1.50    0.40
  -1   5  -1  158.08    4.20
  -1   5  -1  174.18    4.20
  -1   5  -1  174.18    3.90
   1  -5   1  166.28    4.30
   1  -5   1  168.88    4.20
   1  -5   1  160.88    4.10
   1  -5   1  163.28    4.20
  -2   5  -1  763.72   15.90
  -2   5  -1  762.82   15.40
  -2   5  -1  772.82   16.20
  -2   5  -1  708.23   15.90
   2  -5   1  729.83   15.90
   2  -5   1  744.33   16.10
   2  -5   1  764.42   16.00
   2  -5   1  733.43   15.90
  -3   5  -1   27.30    1.20
  -3   5  -1   29.50    1.30
  -3   5  -1   25.70    1.40
  -3   5  -1   29.40    1.40
   3  -5   1   25.60    1.20
   3  -5   1   25.80    1.50
   3  -5   1   24.10    1.50
  -4   5  -1  100.49    3.70
  -4   5  -1  108.69    3.00
  -4   5  -1  108.59    3.10
  -4   5  -1  105.79    2.90
   4  -5   1  107.19    3.20
   4  -5   1  108.49    3.00
   4  -5   1  107.09    3.40
   4  -5   1  105.29    3.30
  -5   5  -1    1.50    0.50
  -5   5  -1    0.00    0.60
  -5   5  -1    0.60    0.50
  -5   5  -1    0.90    0.60
   5  -5   1   -0.40    0.70
   5  -5   1    1.30    0.50
   5  -5   1    0.40    0.50
   5  -5   1    0.10    0.50
  -6   5  -1    0.90    0.50
  -6   5  -1    0.10    0.30
  -6   5  -1   -0.60    0.50
   6  -5   1    0.30    0.40
   6  -5   1   -0.30    0.30
   6  -5   1    0.00    0.70
   6  -5   1    0.20    0.50
  -7   5  -1    0.60    0.40
  -7   5  -1    0.00    0.50
  -7   5  -1    1.50    0.60
   7  -5   1    0.80    0.80
   7  -5   1   -0.30    0.30
   7  -5   1    0.30    0.50
   7  -5   1    1.90    0.70
  -8   5  -1   41.50    1.80
  -8   5  -1   45.00    1.50
   8  -5   1   40.70    2.40
   8  -5   1   44.20    2.20
   8  -5   1   43.30    1.60
  -9   5  -1   27.50    1.30
  -9   5  -1   27.20    1.30
   9  -5   1   27.40    1.10
   9  -5   1   26.50    2.10
  10  -5   1    4.20    1.20
  13   4  -1    0.80    0.50
  13   4  -1    0.40    0.50
  13   4  -1    1.70    0.70
  12   4  -1   -0.50    0.60
  12   4  -1    2.00    0.40
  12   4  -1    1.40    0.50
  12   4  -1    1.30    0.60
  12   4  -1    1.40    0.50
  12   4  -1    1.30    0.40
  11   4  -1   10.40    1.00
  11   4  -1    9.80    0.70
  11   4  -1   11.60    1.30
  11   4  -1   10.90    0.60
  11   4  -1    8.50    0.90
  10   4  -1   -0.20    0.50
  10   4  -1    1.00    0.60
  10   4  -1    0.90    0.30
  10   4  -1    1.40    0.30
  10   4  -1    0.40    0.40
  10   4  -1    0.40    0.50
   9   4  -1    8.50    1.00
   9   4  -1    8.20    0.90
   9   4  -1    7.70    1.00
   9   4  -1    8.80    1.00
   8   4  -1 1014.70   22.10
   8   4  -1 1032.40   21.70
   8   4  -1 1029.70   21.90
   8   4  -1 1033.60   22.00
   7   4  -1  370.86    8.60
   7   4  -1  369.56    8.80
   7   4  -1  378.96    8.60
   7   4  -1  386.36    9.00
   6   4  -1  105.09    3.20
   6   4  -1  111.99    3.30
   6   4  -1  103.59    3.00
   6   4  -1  105.19    3.00
   5   4  -1  101.49    3.00
   5   4  -1  101.29    2.70
   5   4  -1   96.99    3.00
  -5  -4   1  100.59    3.00
   4   4  -1    0.50    0.30
   4   4  -1    0.70    0.40
   4   4  -1    0.60    0.20
   4   4  -1    0.60    0.30
  -4  -4   1    0.80    0.40
  -4  -4   1    0.50    0.30
   3   4  -1  753.62   15.80
   3   4  -1  730.33   15.50
   3   4  -1  750.52   15.20
   3   4  -1  745.83   15.80
   3   4  -1  728.93   15.20
  -3  -4   1  765.92   15.50
  -3  -4   1  724.53   15.80
   2   4  -1   12.00    0.60
   2   4  -1   12.10    0.80
   2   4  -1   12.90    0.70
   2   4  -1   14.70    0.80
   2   4  -1   12.30    0.70
  -2  -4   1   12.70    0.90
  -2  -4   1   13.10    0.70
  -2  -4   1   12.50    0.60
  -2  -4   1   13.10    0.60
   1   4  -1   39.80    1.40
   1   4  -1   42.40    1.40
   1   4  -1   41.00    1.30
   1   4  -1   41.60    1.50
   1   4  -1   38.50    1.30
  -1  -4   1   42.20    1.50
  -1  -4   1   42.20    1.40
  -1  -4   1   39.60    1.30
  -1  -4   1   42.60    1.30
  -1  -4   1   40.50    1.30
   0   4  -1  336.27    7.00
   0   4  -1  324.57    7.30
   0   4  -1  312.27    7.10
   0   4  -1  311.77    7.20
   0   4  -1  316.37    7.10
   0  -4   1  322.07    7.10
   0  -4   1  331.77    7.10
   0  -4   1  321.97    7.20
   0  -4   1  320.17    7.30
   0  -4   1  338.87    7.10
  -1   4  -1  665.83   13.60
  -1   4  -1  619.94   13.50
  -1   4  -1  661.93   13.20
  -1   4  -1  632.04   13.50
  -1   4  -1  638.54   13.60
   1  -4   1  654.53   13.50
   1  -4   1  654.93   13.50
   1  -4   1  607.34   13.50
   1  -4   1  613.24   13.60
  -2   4  -1  202.48    4.60
  -2   4  -1  195.68    4.80
   2  -4   1  191.58    4.70
   2  -4   1  187.78    4.80
   2  -4   1  189.38    4.60
  -3   4  -1    2.00    0.50
  -3   4  -1    2.20    0.40
  -3   4  -1    2.40    0.50
  -3   4  -1    1.90    0.60
   3  -4   1    0.90    0.40
   3  -4   1    1.70    0.40
   3  -4   1    1.90    0.60
   3  -4   1    1.70    0.40
  -4   4  -1  135.59    3.40
  -4   4  -1  141.69    3.60
  -4   4  -1  133.19    3.70
  -4   4  -1  136.79    3.40
   4  -4   1  129.19    4.10
   4  -4   1  137.09    3.40
   4  -4   1  129.39    3.80
   4  -4   1  132.49    3.60
  -5   4  -1   61.89    2.20
  -5   4  -1   61.99    1.90
  -5   4  -1   61.39    1.90
  -5   4  -1   63.39    2.10
   5  -4   1   62.59    2.40
   5  -4   1   66.79    2.40
   5  -4   1   62.79    1.90
   5  -4   1   62.19    2.20
  -6   4  -1   90.59    2.50
  -6   4  -1   89.49    2.70
  -6   4  -1   87.39    2.80
   6  -4   1   87.29    3.10
   6  -4   1   91.09    2.50
   6  -4   1   94.39    3.00
   6  -4   1   92.59    3.10
  -7   4  -1   36.70    1.60
  -7   4  -1   36.50    1.50
  -7   4  -1   36.80    1.40
   7  -4   1   36.70    2.00
   7  -4   1   36.50    1.40
   7  -4   1   36.70    1.80
   7  -4   1   37.90    2.00
  -8   4  -1    0.20    0.40
  -8   4  -1    0.80    0.50
  -8   4  -1    0.10    0.30
   8  -4   1   -0.10    0.30
   8  -4   1   -0.60    0.60
   8  -4   1    1.50    0.60
   8  -4   1    0.20    0.50
  -9   4  -1    6.20    0.60
  -9   4  -1    7.20    0.60
  -9   4  -1    6.30    0.50
   9  -4   1    6.90    1.20
   9  -4   1    7.90    1.10
  10  -4   1    2.10    0.80
  11  -4   1   12.40    1.60
  13   3  -1   31.50    1.50
  13   3  -1   28.90    2.00
  13   3  -1   31.00    1.50
  12   3  -1   16.40    1.50
  12   3  -1   18.20    0.90
  12   3  -1   20.80    1.60
  12   3  -1   20.00    1.20
  12   3  -1   20.50    1.30
  12   3  -1   20.30    1.20
  11   3  -1   -0.30    0.50
  11   3  -1    0.80    0.30
  11   3  -1    0.20    0.40
  11   3  -1   -0.20    0.50
  11   3  -1   -0.30    0.50
  11   3  -1    0.20    0.40
  10   3  -1    8.90    0.60
  10   3  -1    8.10    0.80
  10   3  -1    8.40    1.10
  10   3  -1    9.50    0.90
  10   3  -1    8.00    1.00
  10   3  -1    8.50    0.70
   9   3  -1    8.90    1.00
   9   3  -1    7.90    0.80
   9   3  -1    7.60    0.50
   9   3  -1    8.40    0.90
   9   3  -1    8.20    0.60
   9   3  -1   10.20    1.20
   8   3  -1    2.60    0.40
   8   3  -1    1.70    0.60
   8   3  -1    2.60    0.70
   8   3  -1    2.80    0.30
   8   3  -1    2.50    0.60
   7   3  -1  282.17    6.50
   7   3  -1  279.77    6.80
   7   3  -1  287.47    6.80
   7   3  -1  276.17    6.80
   6   3  -1    2.70    0.50
   6   3  -1    4.50    0.60
   6   3  -1    3.60    0.70
   6   3  -1    3.50    0.70
   5   3  -1   41.40    1.60
   5   3  -1   41.60    1.50
   5   3  -1   41.60    1.50
   5   3  -1   40.70    1.60
  -5  -3   1   40.90    1.60
   4   3  -1   30.70    1.30
   4   3  -1   30.50    1.20
   4   3  -1   30.20    1.30
  -4  -3   1   33.70    1.40
   3   3  -1  198.68    4.50
   3   3  -1  196.18    4.80
   3   3  -1  195.08    4.80
   3   3  -1  203.38    4.20
   3   3  -1  205.28    4.20
  -3  -3   1  200.28    4.60
  -3  -3   1  209.18    4.80
   2   3  -1  202.38    4.40
   2   3  -1  205.38    4.60
   2   3  -1  205.98    4.80
   2   3  -1  205.88    4.40
  -2  -3   1  207.18    4.20
  -2  -3   1  209.48    4.30
  -2  -3   1  205.98    4.60
   1   3  -1  187.48    4.20
   1   3  -1  183.88    4.40
   1   3  -1  195.78    4.20
   1   3  -1  195.18    4.40
   1   3  -1  189.78    4.30
  -1  -3   1  187.88    4.20
  -1  -3   1  196.38    4.40
  -1  -3   1  192.98    4.20
  -1  -3   1  188.38    4.20
   0   3  -1  490.85   10.20
   0   3  -1  462.85   10.10
   0   3  -1  479.65   10.10
   0  -3   1  481.45   10.10
   0  -3   1  472.85   10.00
   0  -3   1  463.75   10.20
   0  -3   1  489.25   10.00
   0  -3   1  490.95   10.10
  -1   3  -1   16.20    0.80
  -1   3  -1   18.10    0.90
  -1   3  -1   18.50    0.60
  -1   3  -1   17.10    0.80
   1  -3   1   16.90    0.90
   1  -3   1   16.90    0.80
   1  -3   1   17.70    0.80
   1  -3   1   18.30    0.60
   1  -3   1   17.70    0.80
  -2   3  -1   23.70    1.10
  -2   3  -1   23.10    1.00
  -2   3  -1   24.20    1.00
  -2   3  -1   25.00    0.90
   2  -3   1   23.60    0.90
   2  -3   1   23.50    1.10
   2  -3   1   24.20    1.00
   2  -3   1   22.80    1.00
  -3   3  -1  433.36    9.30
  -3   3  -1  437.16    9.10
  -3   3  -1  423.56    9.40
  -3   3  -1  441.36    9.20
   3  -3   1  423.46    9.50
   3  -3   1  433.96    9.20
   3  -3   1  413.06    9.30
   3  -3   1  428.06    9.40
  -4   3  -1   15.20    1.00
  -4   3  -1   16.30    0.80
  -4   3  -1   15.80    0.80
  -4   3  -1   15.60    0.90
   4  -3   1   14.80    1.00
   4  -3   1   16.70    0.80
   4  -3   1   16.10    1.00
   4  -3   1   16.60    1.10
  -5   3  -1  337.57    7.80
  -5   3  -1  353.66    7.80
  -5   3  -1  341.47    7.60
   5  -3   1  349.47    7.90
   5  -3   1  352.16    7.50
   5  -3   1  342.37    8.10
  -6   3  -1    9.60    0.80
  -6   3  -1    8.10    0.60
  -6   3  -1    8.90    0.80
   6  -3   1    8.70    0.90
   6  -3   1    9.50    0.60
   6  -3   1    9.70    1.10
  -7   3  -1  148.69    3.90
  -7   3  -1  154.78    3.70
   7  -3   1  154.98    3.70
   7  -3   1  165.18    4.60
   7  -3   1  153.48    4.30
  -8   3  -1    3.90    0.50
  -8   3  -1    3.50    0.50
  -8   3  -1    2.70    0.50
   8  -3   1    2.80    0.40
   8  -3   1    2.40    0.80
   8  -3   1    4.10    0.80
  -9   3  -1   36.10    1.20
   9  -3   1   37.60    1.90
   9  -3   1   36.70    2.10
   9  -3   1   36.00    2.10
  10  -3   1   52.79    2.40
  10  -3   1   53.29    2.60
  11  -3   1    3.90    1.10
  12   2  -1    0.40    0.50
  12   2  -1    0.30    0.60
  12   2  -1    0.80    0.70
  12   2  -1   -0.20    0.40
  11   2  -1    1.20    0.50
  11   2  -1    0.30    0.40
  11   2  -1    0.70    0.40
  11   2  -1   -0.10    0.50
  11   2  -1   -0.60    0.50
  10   2  -1    0.30    0.50
  10   2  -1    0.90    0.30
  10   2  -1    0.30    0.40
  10   2  -1    0.50    0.40
  10   2  -1   -0.20    0.30
  10   2  -1   -0.20    0.50
   9   2  -1   35.50    1.70
   9   2  -1   33.60    1.20
   9   2  -1   35.00    1.60
   9   2  -1   34.50    1.40
   9   2  -1   34.30    1.30
   8   2  -1    8.70    0.60
   8   2  -1    8.70    0.70
   8   2  -1    9.40    0.90
   8   2  -1    7.90    0.70
   7   2  -1  110.89    2.70
   7   2  -1  110.49    2.60
   7   2  -1  115.09    2.90
   7   2  -1  114.29    3.30
   6   2  -1   16.60    0.80
   6   2  -1   16.30    0.60
   6   2  -1   17.40    0.60
   6   2  -1   16.00    1.00
   5   2  -1  186.68    4.30
   5   2  -1  178.28    4.50
  -5  -2   1  187.88    4.60
   4   2  -1  100.09    2.50
   4   2  -1   93.99    2.60
  -4  -2   1   97.39    2.70
   3   2  -1   64.19    1.90
   3   2  -1   65.99    1.80
  -3  -2   1   65.69    1.90
   2   2  -1  121.29    2.90
   2   2  -1  126.39    3.00
   2   2  -1  124.69    2.60
   2   2  -1  127.59    2.60
  -2  -2   1  126.39    3.00
  -2  -2   1  123.29    2.90
   1   2  -1 2359.06   97.59
  -1  -2   1 1929.01   91.39
   0   2  -1 1917.61   99.49
   0  -2   1 1903.91   99.89
  -1   2  -1   31.40    1.10
  -1   2  -1   32.60    0.80
  -1   2  -1   30.80    1.00
  -1   2  -1   31.50    1.00
   1  -2   1   31.00    1.00
   1  -2   1   32.20    1.00
   1  -2   1   33.90    1.20
   1  -2   1   31.00    1.00
   1  -2   1   31.60    0.90
  -2   2  -1  159.38    3.70
  -2   2  -1  162.18    3.50
  -2   2  -1  164.48    3.70
  -2   2  -1  161.68    3.60
   2  -2   1  145.69    3.70
   2  -2   1  157.68    3.70
   2  -2   1  161.58    3.50
   2  -2   1  150.68    3.70
  -3   2  -1  637.44   13.50
  -3   2  -1  659.03   13.30
  -3   2  -1  664.13   13.30
   3  -2   1  627.14   13.60
   3  -2   1  652.93   13.30
   3  -2   1  619.14   13.50
  -4   2  -1    0.80    0.30
  -4   2  -1    1.40    0.40
  -4   2  -1    1.00    0.30
   4  -2   1    1.10    0.40
   4  -2   1    1.40    0.30
   4  -2   1    1.00    0.50
  -5   2  -1    1.80    0.40
  -5   2  -1    2.10    0.40
  -5   2  -1    1.90    0.40
   5  -2   1    2.20    0.30
   5  -2   1    2.90    0.80
   5  -2   1    1.70    0.40
  -6   2  -1    8.10    0.70
  -6   2  -1    8.90    0.60
  -6   2  -1    8.20    0.60
   6  -2   1    6.70    0.90
   6  -2   1    9.10    0.80
   6  -2   1    9.30    0.60
  -7   2  -1   19.50    0.80
  -7   2  -1   20.20    0.90
  -7   2  -1   19.70    0.90
   7  -2   1   19.90    1.40
   7  -2   1   20.20    0.80
   7  -2   1   19.10    1.20
  -8   2  -1  146.19    3.60
   8  -2   1  144.89    4.10
   8  -2   1  150.98    4.30
   8  -2   1  146.29    3.40
   9  -2   1   23.20    1.60
   9  -2   1   25.50    1.50
  10  -2   1   11.10    1.40
  10  -2   1   10.60    1.10
  11  -2   1    4.50    1.00
  11  -2   1    4.70    0.80
  12  -2   1   35.30    2.20
  12   1  -1   21.30    1.20
  12   1  -1   17.80    1.10
  12   1  -1   20.00    1.40
  11   1  -1   20.00    1.20
  11   1  -1   22.20    1.20
  11   1  -1   20.60    1.10
  11   1  -1   20.50    1.40
  10   1  -1   -0.20    0.50
  10   1  -1    0.10    0.50
  10   1  -1    0.50    0.40
  10   1  -1    0.50    0.40
  10   1  -1    0.60    0.40
   9   1  -1   56.79    2.10
   9   1  -1   58.89    2.00
   9   1  -1   55.69    2.00
   9   1  -1   55.19    1.90
   8   1  -1  138.29    3.80
   8   1  -1  142.39    3.40
   8   1  -1  135.09    3.30
   8   1  -1  138.89    3.60
   7   1  -1  184.28    4.40
   7   1  -1  184.18    4.30
   7   1  -1  187.18    4.60
   7   1  -1  185.08    4.20
   6   1  -1   41.80    1.20
   6   1  -1   42.10    1.30
   6   1  -1   42.20    1.60
   6   1  -1   40.60    1.30
   5   1  -1  168.08    4.20
   5   1  -1  178.08    3.80
   5   1  -1  172.38    3.90
   5   1  -1  174.18    3.90
  -5  -1   1  176.48    4.20
   4   1  -1   66.39    1.70
   4   1  -1   66.69    1.60
   4   1  -1   66.79    1.50
   4   1  -1   65.39    1.90
  -4  -1   1   70.49    2.00
   3   1  -1 1381.86   62.19
   3   1  -1 1444.26   61.19
   2   1  -1 2510.45   78.29
   1   1  -1 2219.78   76.29
  -1  -1   1 2130.99   73.29
  -1   1  -1  504.15   44.40
   1  -1   1  498.05   44.50
  -2   1  -1  734.33   61.39
   2  -1   1  781.02   64.19
  -3   1  -1  172.48    3.80
  -3   1  -1  173.68    3.80
  -3   1  -1  172.78    3.90
   3  -1   1  170.38    3.60
   3  -1   1  172.88    4.00
   3  -1   1  163.38    3.80
   3  -1   1  171.78    3.80
   3  -1   1  176.28    3.60
  -4   1  -1  451.35    9.20
  -4   1  -1  442.66    9.20
  -4   1  -1  450.15    9.10
   4  -1   1  437.46    9.40
   4  -1   1  422.16    9.30
   4  -1   1  432.36    9.20
   4  -1   1  439.86    9.10
   4  -1   1  421.16    9.10
  -5   1  -1    5.80    0.40
  -5   1  -1    6.70    0.50
  -5   1  -1    6.20    0.50
   5  -1   1    5.70    0.40
   5  -1   1    6.40    0.50
   5  -1   1    6.70    0.70
   5  -1   1    6.50    0.40
   5  -1   1    5.30    0.60
  -6   1  -1  169.78    3.70
  -6   1  -1  170.98    4.00
   6  -1   1  166.18    4.30
   6  -1   1  161.58    4.10
   6  -1   1  172.28    4.00
   6  -1   1  172.08    3.80
   6  -1   1  172.58    3.80
  -7   1  -1   26.50    1.10
   7  -1   1   28.20    1.10
   7  -1   1   26.70    1.40
   7  -1   1   27.90    1.30
   7  -1   1   27.10    1.00
   7  -1   1   29.20    1.00
  -8   1  -1   47.00    1.50
   8  -1   1   49.00    1.40
   8  -1   1   47.40    2.00
   8  -1   1   50.09    1.50
   8  -1   1   50.29    1.60
   9  -1   1    0.00    0.60
   9  -1   1    0.70    0.50
  10  -1   1    0.10    0.40
  10  -1   1    0.50    0.60
  11  -1   1    0.40    0.70
  11  -1   1    0.90    0.50
  12  -1   1   -0.30    0.60
  12  -1   1    0.50    0.70
  12   0  -1   11.90    1.10
  12   0  -1    9.20    1.20
  11   0  -1   34.20    1.80
  11   0  -1   29.20    1.30
  11   0  -1   31.00    1.60
  10   0  -1   67.99    2.20
  10   0  -1   66.09    2.40
  10   0  -1   72.49    2.60
   9   0  -1    6.60    0.80
   9   0  -1    6.50    0.90
   9   0  -1    7.40    0.80
   8   0  -1  258.17    6.00
   8   0  -1  257.87    6.20
   8   0  -1  257.87    6.00
   8   0  -1  251.47    6.00
   7   0  -1   84.79    2.40
   7   0  -1   89.39    2.50
   7   0  -1   91.29    2.50
   7   0  -1   87.19    2.60
   7   0  -1   87.99    2.10
   6   0  -1   79.99    2.30
   6   0  -1   80.79    2.20
   6   0  -1   77.29    1.90
   6   0  -1   79.69    2.30
   6   0  -1   83.99    2.30
   5   0  -1  115.79    2.90
   5   0  -1  113.99    2.80
   5   0  -1  113.09    2.90
   5   0  -1  116.79    2.60
  -5   0   1  114.79    2.90
   4   0  -1 1652.73   97.89
   2   0  -1   27.70    0.90
   2   0  -1   29.70    0.80
   2   0  -1   29.40    0.70
   2   0  -1   28.70    0.80
  -2   0   1   27.60    0.70
  -2   0   1   29.60    0.70
  -2   0   1   28.50    0.90
   1   0  -1  196.98    4.10
   1   0  -1  195.78    4.10
   1   0  -1  193.88    4.10
  -1   0   1  197.88    4.10
  -1   0   1  195.68    4.10
  -1   0   1  198.58    4.10
   1   0   1  219.88   22.50
  -2   0  -1  201.38    4.20
  -2   0  -1  202.48    4.20
   2   0   1  194.68    4.20
   2   0   1  198.18    4.30
   2   0   1  200.38    4.20
  -3   0  -1  879.71   17.70
   3   0   1  875.41   17.90
  -4   0  -1  194.18    3.90
  -4   0  -1  194.48    4.30
   4   0   1  192.58    4.30
   4   0   1  188.78    4.30
   4   0   1  189.98    4.20
   4   0   1  186.98    4.30
  -5   0  -1  208.88    4.70
   5   0   1  200.88    4.70
   5   0   1  212.18    4.50
   5   0   1  208.98    4.70
   5   0   1  201.08    4.60
   5   0   1  205.68    4.60
  -6   0  -1    0.40    0.30
   6   0   1    0.40    0.30
   6   0   1    0.50    0.30
   6   0   1    0.40    0.30
   6   0   1    0.80    0.20
   6   0   1    0.50    0.40
  -7   0  -1    8.80    0.60
   7   0   1    6.90    0.60
   7   0   1    8.90    0.60
   7   0   1    9.00    0.70
   7   0   1    9.10    0.70
   7   0   1    8.00    0.80
   8   0   1    7.00    0.80
   8   0   1    7.00    0.70
   8   0   1    6.40    0.50
   8   0   1    5.90    0.70
   8   0   1    6.70    0.50
   8   0   1    6.70    0.70
   9   0   1   10.90    0.60
   9   0   1    9.10    0.60
   9   0   1   10.50    0.80
   9   0   1    8.50    0.90
   9   0   1   10.20    0.80
   9   0   1   10.70    1.10
  10   0   1   12.80    0.90
  10   0   1   15.50    1.30
  10   0   1   14.80    0.90
  10   0   1   16.40    1.10
  11   0   1   11.40    1.00
  11   0   1   12.40    1.20
  12   0   1    0.60    0.50
  12   0   1    0.60    0.60
  12  -1  -1   10.00    1.30
  11  -1  -1    9.60    0.70
  11  -1  -1   13.50    1.20
  11  -1  -1    9.60    0.80
  11  -1  -1   13.30    1.40
  10  -1  -1    8.30    0.80
  10  -1  -1    9.60    1.00
  10  -1  -1    9.70    1.20
   9  -1  -1   60.59    2.00
   9  -1  -1   59.89    2.20
   9  -1  -1   58.39    2.40
   8  -1  -1   10.10    1.10
   8  -1  -1    9.00    0.80
   8  -1  -1    8.40    0.90
   7  -1  -1    0.80    0.40
   7  -1  -1    0.40    0.40
   7  -1  -1   -0.10    0.50
   6  -1  -1    0.40    0.70
   6  -1  -1    0.40    0.30
   6  -1  -1    0.10    0.30
   5  -1  -1  420.06    9.20
   5  -1  -1  431.36    9.30
   5  -1  -1  416.06    9.20
  -5   1   1  431.66    8.80
   4  -1  -1  157.68    3.70
   4  -1  -1  158.78    3.80
   4  -1  -1  155.98    3.70
  -4   1   1  163.18    3.60
  -4   1   1  159.98    3.50
  -4   1   1  156.28    3.60
   3  -1  -1  530.45   11.40
   3  -1  -1  534.85   11.50
   3  -1  -1  554.04   11.50
  -3   1   1  563.94   11.30
  -3   1   1  549.54   11.30
  -3   1   1  554.74   11.40
   2  -1  -1  297.57    6.40
   2  -1  -1  288.07    6.40
   2  -1  -1  304.07    6.40
  -2   1   1  303.07    6.40
  -2   1   1  299.37    6.20
  -2   1   1  304.47    6.30
   0  -1  -1   68.59    1.60
   0  -1  -1   70.09    1.60
   0  -1  -1   67.29    1.60
   0   1   1   71.89    1.60
   0   1   1   66.09    1.60
   0   1   1   70.49    1.60
  -2  -1  -1  788.92   40.40
   2   1   1  774.42   39.80
  -3  -1  -1   35.70    1.10
   3   1   1   35.60    0.80
   3   1   1   35.20    1.10
   3   1   1   34.60    0.80
   3   1   1   35.60    1.00
  -4  -1  -1   21.20    0.90
   4   1   1   20.60    0.60
   4   1   1   21.50    0.70
   4   1   1   20.90    0.90
   4   1   1   20.70    0.60
   4   1   1   22.10    0.90
  -5  -1  -1  386.46    8.10
   5   1   1  367.06    8.10
   5   1   1  378.56    7.80
   5   1   1  376.56    7.90
   5   1   1  364.26    8.00
   5   1   1  362.06    7.80
  -6  -1  -1  175.38    4.20
   6   1   1  177.08    4.30
   6   1   1  177.28    3.90
   6   1   1  178.88    4.00
   6   1   1  173.08    4.10
   6   1   1  171.38    4.00
   7   1   1   16.00    0.80
   7   1   1   16.50    0.90
   7   1   1   14.60    0.90
   7   1   1   16.30    0.90
   7   1   1   15.90    0.80
   8   1   1   25.70    1.30
   8   1   1   26.00    1.00
   8   1   1   24.60    1.10
   8   1   1   24.60    1.20
   8   1   1   25.20    1.00
   8   1   1   25.50    1.10
   9   1   1   12.70    0.70
   9   1   1   14.10    0.90
   9   1   1   13.50    1.00
   9   1   1   13.00    0.90
   9   1   1   13.00    0.70
  10   1   1   98.69    2.50
  10   1   1   98.29    2.50
  10   1   1  100.89    3.00
  10   1   1   98.99    3.00
  10   1   1  100.09    2.90
  11   1   1   37.10    1.50
  11   1   1   34.70    1.50
  11   1   1   35.40    1.70
  11   1   1   32.50    2.30
  12   1   1    0.30    0.60
  12   1   1    0.50    0.40
  13   1   1    4.10    0.80
  13   1   1    6.50    1.20
  11  -2  -1   -0.40    0.60
  10  -2  -1    4.30    0.60
  10  -2  -1    3.70    0.90
   9  -2  -1  147.99    4.30
   9  -2  -1  150.88    3.90
   9  -2  -1  153.58    4.50
   8  -2  -1    2.20    0.70
   8  -2  -1    0.70    0.40
   8  -2  -1    1.40    0.60
   7  -2  -1    7.60    1.00
   7  -2  -1    7.60    0.80
   7  -2  -1    7.20    0.90
   6  -2  -1    2.30    0.50
   6  -2  -1    2.10    0.60
   6  -2  -1    2.90    0.60
  -6   2   1    3.10    0.40
  -6   2   1    2.30    0.40
   5  -2  -1  170.38    4.10
   5  -2  -1  165.78    4.30
   5  -2  -1  164.38    4.10
  -5   2   1  172.98    3.90
  -5   2   1  162.78    4.00
   4  -2  -1    2.00    0.40
   4  -2  -1    2.70    0.40
   4  -2  -1    3.40    0.60
  -4   2   1    2.50    0.40
  -4   2   1    2.80    0.50
  -4   2   1    3.10    0.30
   3  -2  -1  255.57    5.70
   3  -2  -1  239.68    5.70
   3  -2  -1  254.07    5.90
  -3   2   1  274.27    5.40
  -3   2   1  257.77    5.80
  -3   2   1  260.87    5.70
  -3   2   1  260.37    5.40
   2  -2  -1  254.77    5.90
   2  -2  -1  272.97    5.90
   2  -2  -1  268.07    6.00
  -2   2   1  275.47    6.00
  -2   2   1  277.37    5.90
  -2   2   1  279.67    6.00
   1  -2  -1 1147.39   87.99
   0  -2  -1 9999.00  297.37
   0   2   1 9965.50  297.97
  -1  -2  -1    0.10    0.20
  -1  -2  -1    0.20    0.20
  -1  -2  -1    0.40    0.20
  -1  -2  -1    0.20    0.10
   1   2   1    0.20    0.20
   1   2   1    0.40    0.20
   1   2   1    0.50    0.20
   1   2   1    0.20    0.10
  -2  -2  -1    8.70    0.30
  -2  -2  -1    8.90    0.30
  -2  -2  -1    8.10    0.50
   2   2   1    8.40    0.40
   2   2   1    8.70    0.50
   2   2   1    8.60    0.40
   2   2   1    9.90    0.60
   2   2   1    9.10    0.30
  -3  -2  -1  251.57    5.40
   3   2   1  245.38    5.30
   3   2   1  242.58    5.20
   3   2   1  240.18    5.40
   4   2   1  143.89    3.50
   4   2   1  143.39    3.50
   4   2   1  144.39    3.40
   5   2   1   -0.10    0.30
   5   2   1    0.10    0.20
   5   2   1    0.20    0.30
   6   2   1   86.69    2.40
   6   2   1   84.99    2.00
   6   2   1   85.69    2.00
   6   2   1   82.29    2.50
   6   2   1   89.09    2.30
   7   2   1  160.58    4.10
   7   2   1  159.58    4.20
   7   2   1  159.98    3.60
   7   2   1  161.68    3.70
   7   2   1  169.98    4.00
   8   2   1  577.04   12.10
   8   2   1  581.94   12.80
   8   2   1  572.04   12.20
   8   2   1  584.44   12.40
   9   2   1   16.60    1.00
   9   2   1   15.90    0.80
   9   2   1   18.00    1.00
   9   2   1   17.40    1.20
   9   2   1   17.80    0.90
  10   2   1   27.80    1.50
  10   2   1   26.50    1.30
  10   2   1   26.50    1.20
  10   2   1   26.90    1.10
  10   2   1   27.20    1.10
  10   2   1   27.30    1.30
  11   2   1    8.90    0.70
  11   2   1    8.80    0.90
  11   2   1    9.10    0.70
  11   2   1    9.50    1.00
  11   2   1    8.50    0.80
  11   2   1    9.30    0.90
  12   2   1  108.09    3.00
  12   2   1  107.09    3.10
  12   2   1  106.79    3.20
  12   2   1  100.29    3.30
  13   2   1    5.60    1.00
  13   2   1    4.60    0.70
  13   2   1    6.50    0.90
  11  -3  -1   28.90    2.10
  10  -3  -1    6.20    0.70
  10  -3  -1    8.00    1.30
   9  -3  -1   39.40    1.60
   9  -3  -1   40.20    2.20
   8  -3  -1    6.80    1.10
   8  -3  -1    7.50    1.00
   8  -3  -1    6.60    0.70
   7  -3  -1    0.20    0.60
   7  -3  -1    0.00    0.40
   7  -3  -1   -0.30    0.40
  -7   3   1    0.10    0.30
  -7   3   1   -0.10    0.30
   6  -3  -1  183.58    4.80
   6  -3  -1  188.18    4.60
   6  -3  -1  191.18    5.00
  -6   3   1  182.18    4.50
  -6   3   1  181.78    5.10
   5  -3  -1  140.39    3.80
   5  -3  -1  145.29    3.60
   5  -3  -1  138.79    3.90
  -5   3   1  136.39    3.10
  -5   3   1  138.99    3.70
   4  -3  -1   50.29    1.80
   4  -3  -1   48.30    1.90
   4  -3  -1   49.60    1.70
  -4   3   1   52.29    1.70
  -4   3   1   50.79    1.80
  -4   3   1   51.09    1.40
   3  -3  -1    3.90    0.50
   3  -3  -1    4.00    0.60
  -3   3   1    4.30    0.60
  -3   3   1    3.60    0.50
  -3   3   1    3.60    0.40
  -3   3   1    4.00    0.60
   2  -3  -1   10.90    0.70
   2  -3  -1   11.70    0.80
   2  -3  -1   11.20    0.70
  -2   3   1   11.40    0.80
  -2   3   1   12.30    0.80
  -2   3   1   12.60    0.90
   1  -3  -1  252.97    5.80
   1  -3  -1  264.67    5.90
   1  -3  -1  244.58    5.70
  -1   3   1  262.97    5.80
  -1   3   1  265.17    5.80
  -1   3   1  268.77    5.90
   0  -3  -1 1484.25  107.79
   0   3   1 1783.42  127.09
  -1  -3  -1   23.80    1.00
  -1  -3  -1   23.90    0.80
  -1  -3  -1   22.80    0.80
  -1  -3  -1   23.00    0.90
   1   3   1   23.30    1.00
   1   3   1   21.90    0.90
   1   3   1   23.90    0.80
   1   3   1   23.00    0.80
  -2  -3  -1  152.18    3.40
  -2  -3  -1  150.98    3.60
  -2  -3  -1  151.98    3.30
   2   3   1  146.19    3.30
   2   3   1  149.59    3.30
   2   3   1  152.08    3.60
   2   3   1  147.89    3.20
  -3  -3  -1 1683.73   82.19
  -3  -3  -1 1585.34   78.09
  -4  -3  -1 1191.98   55.79
  -4  -3  -1 1294.17   58.39
   5   3   1    0.00    0.20
   5   3   1    0.30    0.20
   5   3   1    0.00    0.30
   5   3   1    0.70    0.40
   6   3   1   43.90    1.70
   6   3   1   44.90    1.60
   6   3   1   45.60    1.60
   7   3   1   59.49    1.90
   7   3   1   60.39    2.00
   7   3   1   55.49    2.10
   8   3   1  106.29    2.50
   8   3   1  111.09    3.00
   8   3   1  107.99    3.10
   8   3   1  107.09    3.40
   8   3   1  106.29    2.50
   9   3   1  204.58    4.70
   9   3   1  210.78    5.30
   9   3   1  213.38    5.10
   9   3   1  214.18    5.60
   9   3   1  210.48    4.70
  10   3   1   18.60    0.90
  10   3   1   19.30    1.20
  10   3   1   18.30    1.30
  10   3   1   18.10    1.00
  10   3   1   21.50    1.40
  11   3   1   13.40    1.10
  11   3   1   13.70    0.80
  11   3   1   12.70    1.00
  11   3   1   13.90    1.20
  11   3   1   12.70    1.20
  11   3   1   14.80    1.00
  12   3   1    0.80    0.40
  12   3   1    0.50    0.60
  12   3   1    0.50    0.50
  12   3   1    1.00    0.50
  12   3   1    0.50    0.30
  12   3   1    0.50    0.30
  12   3   1    0.10    0.40
  13   3   1   83.39    2.70
  13   3   1   85.89    2.60
  13   3   1   88.09    3.40
  13   3   1   75.99    3.40
  13   3   1   85.89    2.60
  10  -4  -1   31.90    1.40
  10  -4  -1   34.00    2.20
   9  -4  -1    6.80    0.80
   9  -4  -1   12.60    2.00
   9  -4  -1    6.50    1.20
   8  -4  -1    4.10    1.00
   8  -4  -1    4.90    0.70
  -8   4   1    4.30    0.60
   7  -4  -1   55.89    2.50
   7  -4  -1   57.49    2.30
   7  -4  -1   54.99    2.00
  -7   4   1   54.09    1.90
  -7   4   1   54.89    2.00
   6  -4  -1    0.20    0.40
   6  -4  -1   -0.10    0.60
   6  -4  -1    0.00    0.50
  -6   4   1   -0.30    0.40
  -6   4   1   -0.10    0.20
  -6   4   1    0.50    0.50
   5  -4  -1  148.29    3.90
   5  -4  -1  149.49    4.10
   5  -4  -1  146.79    4.30
  -5   4   1  152.18    3.90
  -5   4   1  149.99    3.40
  -5   4   1  147.29    4.00
   4  -4  -1   48.20    1.70
   4  -4  -1   45.40    2.00
  -4   4   1   47.00    1.70
  -4   4   1   48.60    1.90
  -4   4   1   50.09    1.80
  -4   4   1   48.60    1.40
   3  -4  -1    9.40    0.80
   3  -4  -1    9.50    0.80
   3  -4  -1   10.30    0.90
  -3   4   1    9.80    0.80
  -3   4   1   11.50    0.70
  -3   4   1   11.00    0.80
  -3   4   1    9.70    0.90
   2  -4  -1    0.10    0.30
   2  -4  -1    0.00    0.30
   2  -4  -1    0.40    0.40
  -2   4   1   -0.30    0.30
  -2   4   1    0.00    0.40
  -2   4   1    0.00    0.30
   1  -4  -1    2.60    0.50
   1  -4  -1    3.00    0.50
   1  -4  -1    1.50    0.50
   1  -4  -1    1.30    0.40
  -1   4   1    2.30    0.50
  -1   4   1    3.10    0.50
  -1   4   1    2.20    0.50
   0  -4  -1   24.80    1.00
   0  -4  -1   22.40    1.10
   0  -4  -1   24.20    1.00
   0   4   1   23.80    1.00
   0   4   1   24.90    1.10
   0   4   1   24.00    1.10
  -1  -4  -1   47.70    1.60
  -1  -4  -1   49.50    1.50
  -1  -4  -1   51.89    1.40
  -1  -4  -1   50.99    1.50
   1   4   1   48.60    1.60
   1   4   1   47.80    1.60
   1   4   1   50.39    1.50
  -3  -4  -1  244.88    5.10
  -3  -4  -1  247.18    5.30
  -3  -4  -1  249.48    5.10
  -3  -4  -1  247.78    5.70
   3   4   1  237.98    5.70
   3   4   1  243.08    5.30
   3   4   1  250.07    5.30
   3   4   1  245.48    5.70
   3   4   1  239.38    5.20
  -4  -4  -1  533.55   11.20
   4   4   1  516.75   10.70
   4   4   1  489.35   11.20
   4   4   1  492.85   11.10
   4   4   1  505.05   11.10
   4   4   1  525.55   10.50
   4   4   1  518.75   10.50
   5   4   1    3.50    0.20
   5   4   1    4.40    0.70
   5   4   1    3.40    0.40
   5   4   1    3.30    0.50
   5   4   1    3.30    0.20
   6   4   1  168.48    4.50
   6   4   1  164.18    4.30
   6   4   1  173.48    4.30
   6   4   1  166.08    4.00
   7   4   1  185.68    5.00
   7   4   1  174.18    4.30
   7   4   1  170.48    4.60
   8   4   1  537.65   11.80
   8   4   1  536.45   11.80
   8   4   1  536.25   12.20
   8   4   1  541.25   12.00
   9   4   1   38.10    1.60
   9   4   1   39.10    1.60
   9   4   1   37.00    1.90
   9   4   1   37.60    1.70
   9   4   1   37.10    1.00
  10   4   1    0.90    0.40
  10   4   1    1.50    0.50
  10   4   1    1.30    0.60
  10   4   1    1.50    0.40
  10   4   1    1.10    0.60
  10   4   1    2.00    0.30
  11   4   1   35.20    1.20
  11   4   1   31.00    1.80
  11   4   1   34.10    1.30
  11   4   1   35.60    1.80
  11   4   1   35.80    1.60
  11   4   1   32.80    1.70
  12   4   1   29.30    1.30
  12   4   1   27.40    1.30
  12   4   1   29.10    1.10
  12   4   1   28.40    1.50
  12   4   1   27.30    1.70
  13   4   1   15.50    1.30
  13   4   1   15.90    1.20
  13   4   1   16.10    0.90
  13   4   1   15.80    1.00
  13   4   1   16.40    1.40
  13   4   1   16.90    0.90
  10  -5  -1    8.40    1.40
  10  -5  -1    6.40    0.70
   9  -5  -1   60.19    2.20
   9  -5  -1   62.69    3.00
  -9   5   1   63.39    1.80
  -9   5   1   63.19    2.30
   8  -5  -1   26.70    2.50
   8  -5  -1   22.10    1.90
   8  -5  -1   21.30    1.30
  -8   5   1   21.00    1.20
  -8   5   1   21.50    1.30
   7  -5  -1   20.80    1.70
   7  -5  -1   18.80    2.10
   7  -5  -1   21.50    1.30
  -7   5   1   20.80    1.30
   6  -5  -1   17.00    1.50
   6  -5  -1   15.60    1.30
   6  -5  -1   17.70    1.20
  -6   5   1   15.90    0.80
  -6   5   1   15.20    1.30
  -6   5   1   17.70    1.20
   5  -5  -1   18.60    1.20
   5  -5  -1   19.00    1.50
   5  -5  -1   18.50    1.40
  -5   5   1   18.90    1.40
  -5   5   1   17.00    1.20
  -5   5   1   18.70    0.90
   4  -5  -1  247.78    6.10
   4  -5  -1  241.08    5.90
   4  -5  -1  235.68    6.20
  -4   5   1  245.28    5.90
  -4   5   1  225.08    6.50
  -4   5   1  254.97    6.00
  -4   5   1  240.68    5.50
   3  -5  -1   16.90    1.10
   3  -5  -1   14.70    1.20
   3  -5  -1   16.70    1.10
  -3   5   1   17.10    1.10
  -3   5   1   17.50    1.20
  -3   5   1   18.50    1.10
   2  -5  -1   70.39    2.30
   2  -5  -1   70.69    2.30
   2  -5  -1   68.49    2.30
   2  -5  -1   71.19    2.40
  -2   5   1   74.09    2.50
  -2   5   1   72.39    2.30
  -2   5   1   70.19    2.30
  -2   5   1   75.19    1.80
   1  -5  -1   33.60    1.40
   1  -5  -1   32.30    1.50
   1  -5  -1   30.00    1.40
   1  -5  -1   33.20    1.40
  -1   5   1   33.30    1.10
  -1   5   1   32.90    1.50
  -1   5   1   32.80    1.40
   0  -5  -1  282.57    6.80
   0  -5  -1  291.97    6.60
   0  -5  -1  292.77    6.60
   0   5   1  285.57    6.70
   0   5   1  305.77    6.50
   0   5   1  293.27    6.80
   0   5   1  292.67    6.80
  -1  -5  -1   15.00    0.90
  -1  -5  -1   12.70    0.90
  -1  -5  -1   13.40    0.80
  -1  -5  -1   14.50    0.80
   1   5   1   13.40    0.80
   1   5   1   13.70    1.00
   1   5   1   13.80    0.90
   1   5   1   15.60    0.90
  -2  -5  -1   63.29    1.70
  -2  -5  -1   65.09    1.80
  -2  -5  -1   62.89    2.10
  -2  -5  -1   63.39    1.80
   2   5   1   61.89    1.70
   2   5   1   61.39    2.00
   2   5   1   59.39    1.80
   2   5   1   60.19    2.10
   2   5   1   58.69    1.90
  -3  -5  -1  258.57    6.10
  -3  -5  -1  258.47    5.50
  -3  -5  -1  257.47    5.60
  -3  -5  -1  261.07    5.50
   3   5   1  254.67    5.60
   3   5   1  252.27    6.00
   3   5   1  244.38    5.70
   3   5   1  242.38    6.10
   3   5   1  252.87    5.50
  -4  -5  -1    1.50    0.40
  -4  -5  -1    2.50    0.30
   4   5   1    1.50    0.30
   4   5   1    2.40    0.90
   4   5   1    1.50    0.30
   4   5   1    1.30    0.50
   4   5   1    2.20    0.30
  -5  -5  -1  118.19    3.40
   5   5   1  115.69    2.70
   5   5   1  114.99    3.30
   5   5   1  118.99    2.70
   5   5   1  114.89    2.80
   5   5   1  113.79    3.40
   5   5   1  115.79    3.30
   6   5   1   43.60    1.10
   6   5   1   44.00    2.10
   6   5   1   41.10    1.70
   6   5   1   44.80    1.10
   6   5   1   42.50    1.40
   6   5   1   42.60    1.80
   7   5   1  210.88    4.90
   7   5   1  208.28    5.40
   7   5   1  207.08    5.30
   7   5   1  206.98    5.50
   8   5   1    5.50    0.70
   8   5   1    6.80    0.90
   8   5   1    6.70    0.90
   8   5   1    5.70    0.90
   9   5   1   27.60    1.70
   9   5   1   24.90    1.30
   9   5   1   27.20    1.50
   9   5   1   25.80    1.40
  10   5   1    2.40    0.80
  10   5   1    2.50    0.60
  10   5   1    2.10    0.60
  10   5   1    2.90    0.60
  11   5   1   52.79    2.20
  11   5   1   51.89    2.10
  11   5   1   51.99    2.10
  11   5   1   52.69    2.60
  12   5   1   20.20    1.40
  12   5   1   19.70    1.60
  12   5   1   18.50    1.40
  12   5   1   20.20    1.30
  13   5   1   41.00    2.00
  13   5   1   37.60    1.80
  13   5   1   39.50    1.40
  13   5   1   40.80    1.70
   9  -6  -1   23.10    2.10
   9  -6  -1   20.40    1.30
  -9   6   1   23.40    1.20
  -9   6   1   22.70    1.20
   8  -6  -1   96.09    3.90
   8  -6  -1   94.59    3.10
  -8   6   1   98.39    3.00
  -8   6   1   97.69    3.20
   7  -6  -1    1.60    0.90
   7  -6  -1    1.20    0.50
  -7   6   1    3.10    0.80
  -7   6   1    1.90    0.60
   6  -6  -1    0.60    0.60
   6  -6  -1   -0.10    0.40
   6  -6  -1    0.20    1.00
   6  -6  -1   -0.20    0.30
  -6   6   1    0.50    0.30
  -6   6   1   -0.10    0.60
  -6   6   1   -0.30    0.50
   5  -6  -1   14.80    1.50
   5  -6  -1   14.40    1.30
   5  -6  -1   17.00    1.40
  -5   6   1   15.10    1.20
  -5   6   1   15.70    1.30
  -5   6   1   15.70    0.90
  -5   6   1   15.10    1.20
   4  -6  -1  517.85   11.90
   4  -6  -1  493.85   11.60
   4  -6  -1  520.55   11.50
  -4   6   1  510.85   11.00
  -4   6   1  511.45   11.50
  -4   6   1  499.85   11.70
  -4   6   1  502.85   11.40
   3  -6  -1   25.20    1.60
   3  -6  -1   24.80    1.40
   3  -6  -1   23.20    1.40
   3  -6  -1   24.70    1.40
  -3   6   1   23.40    1.50
  -3   6   1   23.20    1.40
  -3   6   1   24.80    1.40
   2  -6  -1   10.80    0.90
   2  -6  -1   12.80    1.10
   2  -6  -1   13.70    1.00
   2  -6  -1   12.00    1.00
  -2   6   1   11.60    1.00
  -2   6   1   13.30    0.60
  -2   6   1   12.90    1.00
  -2   6   1   11.80    1.10
   1  -6  -1    1.80    0.50
   1  -6  -1    2.10    0.60
   1  -6  -1    2.70    0.60
   1  -6  -1    1.80    0.50
  -1   6   1    2.60    0.40
  -1   6   1    1.10    0.40
  -1   6   1    1.50    0.60
  -1   6   1    2.10    0.60
   0  -6  -1  394.86    8.60
   0  -6  -1  381.36    8.90
   0  -6  -1  388.36    8.70
   0  -6  -1  382.86    8.70
   0   6   1  375.66    8.70
   0   6   1  388.46    8.80
   0   6   1  383.96    8.40
   0   6   1  379.06    8.80
  -1  -6  -1  154.78    3.80
  -1  -6  -1  157.98    3.90
  -1  -6  -1  156.08    3.90
  -1  -6  -1  151.98    4.20
   1   6   1  150.48    4.10
   1   6   1  148.79    4.00
   1   6   1  142.59    3.90
   1   6   1  159.38    3.90
  -2  -6  -1  543.85   11.30
  -2  -6  -1  531.05   11.30
  -2  -6  -1  530.45   11.80
  -2  -6  -1  527.85   11.30
   2   6   1  519.05   11.70
   2   6   1  551.64   11.60
   2   6   1  529.65   11.80
   2   6   1  510.35   11.50
   2   6   1  520.45   11.30
  -3  -6  -1   45.60    1.50
  -3  -6  -1   47.60    1.90
  -3  -6  -1   46.30    1.40
  -3  -6  -1   44.90    1.40
   3   6   1   45.80    1.40
   3   6   1   44.10    1.50
   3   6   1   45.10    1.60
  -4  -6  -1   16.10    1.10
  -4  -6  -1   16.90    0.80
  -4  -6  -1   16.70    0.60
   4   6   1   17.60    0.90
   4   6   1   16.30    1.10
   4   6   1   16.30    0.90
   4   6   1   16.70    0.80
   4   6   1   16.20    1.10
  -5  -6  -1  100.89    2.60
  -5  -6  -1  100.99    3.20
   5   6   1   99.99    2.60
   5   6   1  100.19    2.50
   5   6   1   99.09    3.10
   5   6   1  100.89    2.60
   6   6   1   33.80    1.70
   6   6   1   34.20    1.10
   6   6   1   33.50    1.20
   6   6   1   32.40    1.60
   6   6   1   33.20    1.70
   6   6   1   33.80    1.10
   7   6   1   50.09    2.10
   7   6   1   47.60    1.60
   7   6   1   44.80    2.00
   7   6   1   45.40    2.10
   7   6   1   46.80    1.30
   7   6   1   45.80    1.30
   8   6   1   34.50    1.90
   8   6   1   30.50    0.90
   8   6   1   31.80    1.30
   8   6   1   28.80    1.60
   8   6   1   30.50    1.70
   8   6   1   31.10    0.90
   9   6   1   40.20    1.90
   9   6   1   36.70    1.50
   9   6   1   35.70    2.00
   9   6   1   33.30    1.80
  10   6   1    1.30    0.60
  10   6   1    0.80    0.40
  10   6   1    0.20    0.50
  10   6   1    1.10    0.60
  11   6   1    3.60    0.80
  11   6   1    2.30    0.60
  11   6   1    3.80    0.70
  11   6   1    2.70    0.80
  12   6   1   15.90    1.20
  12   6   1   13.60    1.20
  12   6   1   12.50    1.30
  13   6   1   22.70    1.40
  13   6   1   19.90    1.50
   9  -7  -1   36.00    2.60
  -9   7   1   37.20    1.70
   8  -7  -1    5.60    0.90
   8  -7  -1    6.90    1.40
  -8   7   1    6.50    1.00
  -8   7   1    7.30    1.00
   7  -7  -1    0.00    0.80
   7  -7  -1    1.20    0.60
  -7   7   1    0.60    0.60
  -7   7   1    0.70    0.60
   6  -7  -1    0.80    0.50
   6  -7  -1    1.10    0.90
  -6   7   1    1.30    0.70
  -6   7   1    0.60    0.40
  -6   7   1    0.80    0.60
   5  -7  -1   77.19    2.90
   5  -7  -1   76.59    2.80
   5  -7  -1   74.59    3.20
  -5   7   1   73.99    2.30
  -5   7   1   75.39    2.80
  -5   7   1   72.09    2.70
  -5   7   1   68.69    2.80
   4  -7  -1    1.90    0.70
   4  -7  -1    1.90    0.60
   4  -7  -1    1.50    0.80
  -4   7   1    1.00    0.60
  -4   7   1    3.60    0.80
  -4   7   1    1.30    0.50
  -4   7   1    2.50    0.80
   3  -7  -1    3.10    0.70
   3  -7  -1    2.70    0.60
   3  -7  -1    3.00    0.80
   3  -7  -1    3.00    0.60
  -3   7   1    3.60    0.80
  -3   7   1    4.00    0.80
  -3   7   1    3.60    0.90
   2  -7  -1  307.77    7.70
   2  -7  -1  319.67    7.90
   2  -7  -1  312.47    7.70
   2  -7  -1  321.57    7.70
  -2   7   1  322.27    7.70
  -2   7   1  319.27    6.90
  -2   7   1  313.07    7.90
  -2   7   1  318.47    7.70
   1  -7  -1   -0.10    0.40
   1  -7  -1    0.40    0.40
   1  -7  -1    0.00    0.30
   1  -7  -1    0.20    0.50
  -1   7   1   -0.30    0.30
  -1   7   1    0.30    0.40
  -1   7   1   -0.60    0.40
  -1   7   1   -0.10    0.40
   0  -7  -1    0.90    0.40
   0  -7  -1    0.70    0.40
   0  -7  -1    1.00    0.50
   0   7   1    1.30    0.50
   0   7   1    1.30    0.60
   0   7   1    1.10    0.40
   0   7   1    1.00    0.50
  -1  -7  -1  173.58    4.60
  -1  -7  -1  184.18    4.60
  -1  -7  -1  196.48    5.50
  -1  -7  -1  180.18    4.50
   1   7   1  183.58    4.60
   1   7   1  179.98    4.90
   1   7   1  172.38    4.60
   1   7   1  190.88    5.30
  -2  -7  -1  354.06    7.80
  -2  -7  -1  341.17    8.70
  -2  -7  -1  346.87    7.80
  -2  -7  -1  353.16    7.90
   2   7   1  331.87    7.90
   2   7   1  346.47    7.80
   2   7   1  351.16    8.30
   2   7   1  334.07    8.00
   2   7   1  359.76    8.10
  -3  -7  -1   11.80    0.80
  -3  -7  -1   11.80    0.80
  -3  -7  -1   10.80    0.70
   3   7   1   12.50    0.90
   3   7   1   11.80    0.90
   3   7   1   11.90    0.80
   3   7   1   13.10    1.00
   3   7   1   12.40    1.10
  -4  -7  -1    6.10    0.50
  -4  -7  -1    6.10    0.60
  -4  -7  -1    6.60    0.50
  -4  -7  -1    5.50    0.80
   4   7   1    5.90    0.90
   4   7   1    6.70    0.80
   4   7   1    4.70    0.90
   4   7   1    7.20    0.60
   4   7   1    6.90    0.90
  -5  -7  -1  101.49    3.30
  -5  -7  -1   99.49    2.70
   5   7   1  103.89    3.30
   5   7   1  102.49    2.80
   5   7   1  101.99    2.70
   5   7   1  100.19    2.70
   5   7   1   98.99    3.30
   6   7   1   16.40    1.30
   6   7   1   18.10    0.90
   6   7   1   16.80    1.30
   6   7   1   16.90    1.30
   6   7   1   17.40    0.90
   6   7   1   17.00    0.90
   7   7   1   94.49    2.60
   7   7   1   87.79    3.20
   7   7   1   94.29    3.20
   7   7   1   96.29    2.40
   7   7   1   96.19    2.50
   7   7   1   91.09    3.30
   8   7   1  207.88    5.60
   8   7   1  197.88    4.50
   8   7   1  204.58    5.80
   8   7   1  202.28    4.90
   8   7   1  193.48    5.50
   8   7   1  202.08    4.50
   9   7   1   61.49    1.60
   9   7   1   61.69    2.10
   9   7   1   59.89    1.60
   9   7   1   63.19    2.80
   9   7   1   63.49    2.50
   9   7   1   62.99    2.60
  10   7   1    0.60    0.40
  10   7   1   -0.20    0.50
  10   7   1   -0.40    0.40
  10   7   1    1.30    0.60
  11   7   1   20.30    1.50
  11   7   1   20.20    1.50
  11   7   1   22.10    1.30
  12   7   1   80.29    3.10
  12   7   1   83.89    2.80
  12   7   1   78.49    3.00
  13   7   1    0.10    0.50
  13   7   1    0.80    0.50
  13   7   1   -0.50    0.50
   8  -8  -1    2.00    1.10
   8  -8  -1    3.60    0.70
  -8   8   1    4.70    1.00
  -8   8   1    2.80    0.70
   7  -8  -1    9.10    1.10
   7  -8  -1    8.70    1.50
  -7   8   1    8.70    1.20
  -7   8   1    8.70    1.10
  -7   8   1    8.20    0.60
   6  -8  -1   14.60    1.30
   6  -8  -1   14.30    1.70
  -6   8   1   14.40    1.40
  -6   8   1   12.30    0.90
  -6   8   1   14.10    1.40
   5  -8  -1    1.10    0.60
   5  -8  -1    0.10    0.80
  -5   8   1    0.40    0.40
  -5   8   1    0.70    0.60
  -5   8   1    0.80    0.70
   4  -8  -1    1.10    0.50
   4  -8  -1    0.50    0.50
   4  -8  -1    0.90    0.70
   4  -8  -1    1.10    0.50
  -4   8   1    0.70    0.60
  -4   8   1    1.30    0.70
  -4   8   1    0.80    0.50
   3  -8  -1    0.60    0.50
   3  -8  -1    0.00    0.70
  -3   8   1   -0.30    0.50
  -3   8   1    1.00    0.60
  -3   8   1   -0.20    0.60
   2  -8  -1   92.29    3.20
   2  -8  -1  100.89    3.50
   2  -8  -1   94.29    3.30
  -2   8   1   94.49    3.30
  -2   8   1   93.79    3.20
  -2   8   1   94.49    3.40
  -2   8   1   94.09    2.50
   1  -8  -1   94.69    3.30
   1  -8  -1   94.79    3.30
   1  -8  -1   95.69    3.10
   1  -8  -1   93.99    3.10
  -1   8   1   92.69    3.30
  -1   8   1   95.49    3.20
  -1   8   1   89.89    2.60
  -1   8   1   95.39    3.20
   0  -8  -1   17.80    1.40
   0  -8  -1   16.40    1.20
   0  -8  -1   15.20    1.10
   0  -8  -1   16.20    1.30
   0   8   1   15.80    1.20
   0   8   1   17.60    1.30
   0   8   1   16.30    1.00
   0   8   1   16.30    1.30
  -1  -8  -1    6.30    0.80
  -1  -8  -1    5.50    0.80
  -1  -8  -1    4.70    0.80
  -1  -8  -1    6.00    0.90
   1   8   1    3.50    0.70
   1   8   1    6.00    0.80
   1   8   1    7.50    0.90
   1   8   1    6.30    0.90
  -2  -8  -1    0.70    0.40
  -2  -8  -1    0.80    0.50
  -2  -8  -1    1.30    0.60
  -2  -8  -1    1.20    0.50
   2   8   1    1.00    0.50
   2   8   1    0.90    0.60
   2   8   1    1.10    0.50
   2   8   1    1.50    0.50
  -3  -8  -1  179.68    5.10
  -3  -8  -1  173.58    4.40
  -3  -8  -1  179.88    4.40
  -3  -8  -1  175.58    4.30
   3   8   1  178.28    5.00
   3   8   1  174.98    4.60
   3   8   1  178.28    4.40
   3   8   1  177.68    4.80
   3   8   1  170.38    5.20
  -4  -8  -1   12.90    1.20
  -4  -8  -1   10.40    0.70
  -4  -8  -1   11.50    0.70
  -4  -8  -1   11.70    0.80
   4   8   1   10.30    1.10
   4   8   1   11.60    1.10
   4   8   1   10.70    0.90
   4   8   1   13.00    0.80
   4   8   1   11.90    1.00
  -5  -8  -1    8.60    1.10
  -5  -8  -1    8.40    0.70
   5   8   1    7.70    0.80
   5   8   1    9.30    0.80
   5   8   1    9.30    0.90
   5   8   1    7.50    1.00
   5   8   1    5.50    0.80
  -6  -8  -1   -0.30    0.30
  -6  -8  -1   -0.20    0.40
   6   8   1    0.40    0.50
   6   8   1    0.20    0.40
   6   8   1    0.20    0.30
   6   8   1   -0.20    0.30
   6   8   1   -0.10    0.40
   7   8   1   87.39    3.20
   7   8   1   79.09    2.30
   7   8   1   88.19    2.60
   7   8   1   83.29    3.10
   7   8   1   78.79    2.40
   8   8   1  283.07    6.30
   8   8   1  280.77    6.40
   8   8   1  291.37    6.60
   8   8   1  286.27    7.40
   8   8   1  277.37    7.60
   8   8   1  283.47    7.50
   9   8   1   28.70    1.30
   9   8   1   27.60    1.80
   9   8   1   29.20    1.80
   9   8   1   27.00    1.10
   9   8   1   28.00    1.90
   9   8   1   28.10    1.10
  10   8   1    0.70    0.40
  10   8   1    1.40    0.80
  10   8   1    0.00    0.50
  10   8   1    0.30    0.30
  10   8   1    0.20    0.60
  10   8   1   -0.20    0.30
  11   8   1    0.00    0.60
  11   8   1    0.20    0.40
  11   8   1   -0.50    0.40
  11   8   1   -0.10    0.20
  12   8   1   12.10    1.60
  12   8   1   10.80    1.00
  12   8   1    9.30    1.20
  13   8   1    0.90    0.70
  13   8   1    0.30    0.40
  13   8   1   -0.40    0.50
   7  -9  -1   50.59    3.10
   7  -9  -1   57.29    3.00
  -7   9   1   53.99    2.60
   6  -9  -1    3.90    0.90
   6  -9  -1    1.70    1.10
  -6   9   1    3.40    0.90
   5  -9  -1    6.70    1.10
   5  -9  -1    6.30    1.30
  -5   9   1    5.50    1.00
  -5   9   1    6.90    1.40
  -5   9   1    7.60    0.90
  -5   9   1    6.10    1.00
   4  -9  -1   28.60    2.10
   4  -9  -1   31.00    1.90
  -4   9   1   33.10    2.10
  -4   9   1   30.00    1.90
  -4   9   1   31.30    1.60
  -4   9   1   29.30    1.90
   3  -9  -1    1.70    0.70
   3  -9  -1    1.90    0.90
   3  -9  -1    1.80    0.70
  -3   9   1    0.10    0.50
  -3   9   1    3.10    0.90
  -3   9   1    3.70    0.90
  -3   9   1    2.30    0.70
   2  -9  -1   32.60    1.90
   2  -9  -1   33.70    2.40
  -2   9   1   35.20    2.00
  -2   9   1   31.90    1.90
  -2   9   1   32.90    1.30
   1  -9  -1  236.28    6.30
   1  -9  -1  238.28    6.60
   1  -9  -1  244.48    6.30
   1  -9  -1  249.68    6.60
  -1   9   1  239.78    6.40
  -1   9   1  241.48    6.50
  -1   9   1  241.38    5.80
   0  -9  -1   25.70    1.60
   0  -9  -1   24.70    1.70
   0  -9  -1   24.40    1.50
   0  -9  -1   23.00    1.40
   0   9   1   26.10    1.60
   0   9   1   23.40    1.30
   0   9   1   24.20    1.70
  -1  -9  -1    3.30    0.70
  -1  -9  -1    2.30    0.70
  -1  -9  -1    1.40    0.60
  -1  -9  -1    1.30    0.60
   1   9   1    1.60    0.60
   1   9   1    1.40    0.70
   1   9   1    1.50    0.60
   1   9   1    1.40    0.60
  -2  -9  -1    0.40    0.50
  -2  -9  -1    0.10    0.60
  -2  -9  -1    0.70    0.40
  -2  -9  -1    1.50    0.60
   2   9   1    1.10    0.70
   2   9   1    1.00    0.70
   2   9   1    0.70    0.60
   2   9   1    0.50    0.50
  -3  -9  -1  430.96    9.60
  -3  -9  -1  428.86   10.50
  -3  -9  -1  427.66    9.60
  -3  -9  -1  437.86    9.70
   3   9   1  423.66   10.00
   3   9   1  419.06    9.90
   3   9   1  424.66   10.10
   3   9   1  443.96   10.40
  -4  -9  -1   30.20    1.30
  -4  -9  -1   27.00    1.80
  -4  -9  -1   29.70    1.30
  -4  -9  -1   25.60    1.20
   4   9   1   27.80    1.80
   4   9   1   29.80    1.70
   4   9   1   28.80    1.30
   4   9   1   28.70    1.60
   4   9   1   28.40    1.50
  -5  -9  -1   15.10    1.40
  -5  -9  -1   13.50    0.60
  -5  -9  -1   13.30    0.60
  -5  -9  -1   13.30    0.90
   5   9   1   13.90    1.10
   5   9   1   14.20    0.90
   5   9   1   13.10    1.20
   5   9   1   15.60    1.20
   5   9   1   11.60    1.30
  -6  -9  -1  104.89    3.80
  -6  -9  -1  102.99    2.90
   6   9   1  102.89    3.70
   6   9   1  105.09    3.00
   6   9   1  108.49    2.90
   7   9   1   70.59    2.20
   7   9   1   77.29    3.10
   7   9   1   72.99    2.30
   7   9   1   73.29    3.00
   7   9   1   67.79    2.40
   8   9   1   52.89    1.80
   8   9   1   51.69    2.50
   8   9   1   48.60    1.80
   8   9   1   52.09    2.60
   8   9   1   52.09    1.80
   9   9   1   61.19    2.00
   9   9   1   60.79    2.80
   9   9   1   58.09    2.00
   9   9   1   57.59    2.70
   9   9   1   58.89    2.90
  10   9   1   -0.10    0.60
  10   9   1    0.60    0.40
  10   9   1   -0.50    0.30
  10   9   1   -0.10    0.30
  11   9   1   66.39    2.30
  11   9   1   67.89    3.10
  11   9   1   66.99    1.90
  11   9   1   62.89    1.90
  11   9   1   68.39    3.00
  12   9   1    7.80    1.20
  12   9   1    8.40    0.80
  12   9   1    8.70    1.30
  13   9   1    2.40    0.90
  13   9   1    0.70    0.60
  13   9   1    3.60    0.60
   6 -10  -1   82.49    3.80
   6 -10  -1   76.29    3.30
  -6  10   1   79.09    2.60
  -6  10   1   76.99    3.30
   5 -10  -1   14.10    1.40
   5 -10  -1   11.50    1.70
  -5  10   1   13.20    1.50
  -5  10   1   14.80    1.40
  -5  10   1   13.00    1.10
   4 -10  -1   40.10    2.30
   4 -10  -1   41.10    2.60
  -4  10   1   40.10    2.20
  -4  10   1   44.30    2.40
  -4  10   1   42.20    2.00
   3 -10  -1   25.20    2.80
   3 -10  -1   24.80    2.00
  -3  10   1   24.10    1.80
  -3  10   1   24.40    2.10
  -3  10   1   24.20    1.60
   2 -10  -1  111.39    3.90
   2 -10  -1  111.79    4.10
   2 -10  -1  116.49    4.10
   2 -10  -1  114.49    3.90
  -2  10   1  111.09    4.10
  -2  10   1  109.19    3.90
  -2  10   1  113.79    3.00
  -2  10   1  113.89    3.90
   1 -10  -1   22.30    1.70
   1 -10  -1   24.80    1.80
  -1  10   1   24.70    1.70
  -1  10   1   22.80    1.70
  -1  10   1   20.90    1.20
   0 -10  -1   11.00    1.10
   0 -10  -1   12.80    1.40
   0 -10  -1   12.30    1.50
   0  10   1   11.60    1.20
   0  10   1   11.00    1.40
   0  10   1   12.20    1.40
  -1 -10  -1    8.60    1.10
  -1 -10  -1    7.60    0.90
  -1 -10  -1    4.70    0.90
  -1 -10  -1    9.20    1.10
   1  10   1    6.50    1.10
   1  10   1    7.30    0.90
   1  10   1    4.90    0.90
   1  10   1    6.10    1.00
  -2 -10  -1   77.79    2.70
  -2 -10  -1   80.99    3.30
  -2 -10  -1   77.69    2.70
  -2 -10  -1   80.09    2.80
   2  10   1   80.39    2.90
   2  10   1   78.19    3.10
   2  10   1   82.89    3.00
   2  10   1   77.69    3.10
  -3 -10  -1   11.60    1.00
  -3 -10  -1   11.40    1.00
  -3 -10  -1   11.10    1.00
   3  10   1   10.30    1.10
   3  10   1   10.20    1.10
   3  10   1   11.40    1.30
   3  10   1   12.50    1.40
  -4 -10  -1    0.90    0.50
  -4 -10  -1    0.80    0.50
  -4 -10  -1    0.70    0.40
   4  10   1    0.70    0.60
   4  10   1    1.40    0.70
   4  10   1    0.00    0.50
   4  10   1    0.30    0.60
   4  10   1    0.50    0.40
  -5 -10  -1    3.60    0.60
  -5 -10  -1    3.60    0.50
   5  10   1    3.90    0.90
   5  10   1    4.10    0.80
   5  10   1    3.40    0.80
   5  10   1    3.00    0.60
   5  10   1    4.30    0.90
  -6 -10  -1   21.10    1.20
   6  10   1   20.90    1.40
   6  10   1   20.20    1.10
   6  10   1   19.50    1.30
   6  10   1   18.80    1.70
  -7 -10  -1    7.70    0.80
   7  10   1    6.10    1.00
   7  10   1    6.40    1.10
   7  10   1    9.20    1.00
   7  10   1    7.80    0.90
   7  10   1    7.90    0.80
   8  10   1   22.50    1.80
   8  10   1   25.70    1.20
   8  10   1   22.50    1.80
   8  10   1   25.10    1.30
   8  10   1   23.40    1.40
   9  10   1   39.60    1.60
   9  10   1   37.90    2.30
   9  10   1   40.50    1.60
   9  10   1   39.30    2.30
   9  10   1   35.90    1.60
  10  10   1   30.10    2.10
  10  10   1   27.20    1.70
  10  10   1   32.00    1.40
  10  10   1   32.80    2.20
  10  10   1   28.60    1.30
  11  10   1    0.70    0.50
  11  10   1    0.90    0.40
  11  10   1   -0.30    0.50
  11  10   1   -0.40    0.40
  11  10   1   -0.40    0.60
  12  10   1    1.10    0.40
  12  10   1    2.40    0.50
  12  10   1    1.70    0.80
  12  10   1    1.20    0.40
  12  10   1    0.90    0.70
   5 -11  -1   45.90    2.90
  -5  11   1   32.00    1.80
  -5  11   1   39.60    2.40
  -5  11   1   40.00    2.30
   4 -11  -1   30.50    2.40
  -4  11   1   27.20    2.00
  -4  11   1   26.90    2.00
   3 -11  -1    0.00    0.80
  -3  11   1    0.70    0.80
  -3  11   1    0.30    0.70
   2 -11  -1    0.60    0.90
   2 -11  -1   -0.70    0.50
  -2  11   1    0.40    0.30
  -2  11   1    0.60    0.70
  -2  11   1   -0.10    0.70
   1 -11  -1   34.30    1.90
   1 -11  -1   35.60    2.20
   1 -11  -1   36.40    2.20
  -1  11   1   33.70    2.20
  -1  11   1   32.50    2.10
  -1  11   1   32.40    1.50
   0 -11  -1    5.80    1.00
   0 -11  -1    4.20    1.00
   0 -11  -1    4.30    0.90
   0  11   1    5.40    1.10
   0  11   1    5.80    1.10
   0  11   1    5.10    0.90
  -1 -11  -1    0.80    0.60
  -1 -11  -1    2.10    0.60
  -1 -11  -1    0.90    0.70
   1  11   1    1.50    0.80
   1  11   1    2.10    0.90
   1  11   1    0.90    0.70
   1  11   1    1.90    0.60
  -2 -11  -1   19.60    1.30
  -2 -11  -1   18.90    1.50
  -2 -11  -1   17.20    1.30
  -2 -11  -1   17.40    1.60
   2  11   1   17.60    1.40
   2  11   1   18.00    1.60
   2  11   1   20.20    1.70
   2  11   1   19.40    1.90
  -3 -11  -1    8.90    1.00
  -3 -11  -1    8.00    1.00
  -3 -11  -1    7.50    0.90
   3  11   1    4.70    0.90
   3  11   1   10.10    1.20
   3  11   1    8.30    1.30
   3  11   1    6.70    1.00
  -4 -11  -1   10.00    1.50
  -4 -11  -1   13.40    1.10
  -4 -11  -1   10.80    1.00
   4  11   1   10.60    1.30
   4  11   1   10.70    1.40
   4  11   1   12.30    1.20
  -5 -11  -1    3.90    0.70
  -5 -11  -1    5.20    0.70
   5  11   1    5.00    1.00
   5  11   1    4.60    0.70
   5  11   1    5.10    1.20
   5  11   1    6.80    1.00
  -6 -11  -1    2.40    0.60
  -6 -11  -1    1.20    0.60
   6  11   1    1.20    0.70
   6  11   1    2.20    0.80
   6  11   1    2.40    0.60
   6  11   1    1.60    0.60
   6  11   1    1.60    0.80
  -7 -11  -1   -0.10    0.30
   7  11   1    0.70    0.50
   7  11   1    0.10    0.40
   7  11   1    0.20    0.50
   7  11   1   -0.50    0.60
   7  11   1   -0.10    0.60
   8  11   1   -0.20    0.70
   8  11   1    0.30    0.40
   8  11   1    0.40    0.50
   8  11   1    0.20    0.50
   8  11   1    0.40    0.70
   9  11   1    5.40    0.80
   9  11   1    4.50    0.70
   9  11   1    4.60    1.10
   9  11   1    5.50    0.70
   9  11   1    4.00    1.00
  10  11   1    0.90    0.50
  10  11   1    1.90    0.60
  10  11   1    0.50    0.70
  10  11   1    0.20    0.80
  10  11   1    1.40    0.50
  11  11   1   12.50    1.00
  11  11   1   11.10    1.00
  11  11   1   15.10    1.90
  11  11   1   10.90    1.50
  11  11   1   12.00    0.90
  12  11   1    4.10    1.10
  12  11   1    5.00    0.70
  12  11   1    4.30    0.70
  12  11   1    4.90    1.10
   4 -12  -1   16.50    2.00
  -4  12   1   15.80    1.50
  -4  12   1   15.20    1.80
  -4  12   1   16.90    1.80
   3 -12  -1   15.80    2.50
  -3  12   1   18.10    1.50
  -3  12   1   22.20    2.20
  -3  12   1   18.00    1.80
   2 -12  -1   19.10    1.90
  -2  12   1   18.50    1.80
  -2  12   1   18.50    1.90
  -2  12   1   18.00    1.00
   1 -12  -1    2.90    1.10
  -1  12   1    4.80    1.10
  -1  12   1    4.50    1.20
  -1  12   1    5.90    0.80
   0 -12  -1    9.40    1.40
   0  12   1    6.70    1.20
   0  12   1    8.60    1.10
   0  12   1    9.80    1.40
  -1 -12  -1    1.00    0.60
  -1 -12  -1    1.80    0.60
  -1 -12  -1    1.10    0.80
   1  12   1   -0.10    0.70
   1  12   1    1.80    0.60
   1  12   1    2.00    0.90
  -2 -12  -1    1.30    0.80
   2  12   1    2.90    0.90
   2  12   1    1.50    0.90
   2  12   1    1.60    0.60
  -3 -12  -1   10.10    1.00
  -3 -12  -1   12.60    1.20
  -3 -12  -1   10.60    1.20
   3  12   1   10.20    1.30
   3  12   1    9.10    1.20
   3  12   1   13.60    1.70
  -4 -12  -1    1.80    0.60
  -4 -12  -1    1.10    0.50
  -4 -12  -1    1.50    0.60
   4  12   1    0.80    0.70
   4  12   1    1.20    0.80
   4  12   1    0.70    0.60
   4  12   1    0.40    0.60
  -5 -12  -1   23.70    1.40
  -5 -12  -1   24.70    1.20
   5  12   1   24.30    2.00
   5  12   1   25.50    1.80
   5  12   1   22.00    1.70
  -6 -12  -1   21.60    1.30
   6  12   1   22.20    1.40
   6  12   1   22.70    2.00
   6  12   1   22.00    1.60
   6  12   1   22.50    2.00
  -7 -12  -1   26.50    1.40
   7  12   1   23.80    1.60
   7  12   1   26.60    1.40
   7  12   1   26.60    2.10
   7  12   1   22.10    1.70
   7  12   1   26.20    2.10
   8  12   1    5.00    0.90
   8  12   1    6.50    0.80
   8  12   1    5.90    1.00
   8  12   1    4.10    1.10
   8  12   1    6.90    1.30
   9  12   1   16.90    1.10
   9  12   1   17.30    1.30
   9  12   1   14.30    1.30
   9  12   1   17.90    1.90
   9  12   1   16.90    2.00
  10  12   1   34.40    1.50
  10  12   1   37.30    2.60
  10  12   1   31.90    1.60
  10  12   1   32.70    2.40
  10  12   1   35.70    1.90
  11  12   1    2.70    0.70
  11  12   1    1.50    0.50
  11  12   1    1.90    1.00
  11  12   1    1.40    0.90
  11  12   1    2.40    0.60
   2 -13  -1    0.10    0.90
  -2  13   1    2.60    1.00
  -2  13   1    1.80    1.00
   1 -13  -1   21.00    2.00
  -1  13   1   19.90    2.10
  -1  13   1   21.20    1.20
   0 -13  -1    5.90    1.20
   0  13   1    6.50    1.20
   0  13   1    7.10    1.00
   0  13   1    5.10    1.30
  -1 -13  -1   34.40    2.20
   1  13   1   36.00    2.30
   1  13   1   33.10    2.10
   1  13   1   31.90    2.40
  -2 -13  -1    1.00    0.60
  -2 -13  -1    0.30    0.70
  -2 -13  -1    1.20    0.60
   2  13   1    1.80    0.50
   2  13   1    0.00    0.70
   2  13   1    0.00    0.70
  -3 -13  -1    0.50    0.50
   3  13   1    1.00    0.80
   3  13   1    0.20    0.50
   3  13   1    0.30    0.70
  -4 -13  -1   12.40    1.10
  -4 -13  -1   14.60    1.10
   4  13   1   12.90    1.40
   4  13   1   12.40    1.70
  -5 -13  -1   81.79    2.90
  -5 -13  -1   84.09    2.60
   5  13   1   79.89    3.20
   5  13   1   77.19    3.70
  -6 -13  -1   11.50    1.10
   6  13   1   10.30    1.30
   6  13   1   11.80    1.70
  -7 -13  -1   30.00    1.60
   7  13   1   30.70    2.40
   7  13   1   31.00    1.80
   7  13   1   28.10    2.30
  -8 -13  -1    2.00    0.60
   8  13   1    2.70    1.00
   8  13   1    3.30    0.90
   8  13   1    2.30    1.10
   8  13   1    2.80    0.60
   8  13   1    2.30    0.70
   9  13   1    5.10    0.70
   9  13   1    7.30    1.10
   9  13   1    5.60    1.00
   9  13   1    4.90    1.30
  10  13   1   17.90    3.10
  10  13   1   23.40    2.20
  10  13   1   23.20    1.70
  10  13   1   25.00    1.30
   1 -14  -1   39.00    2.60
  -1  14   1   34.30    2.60
   0  14   1   24.20    3.60
   0  14   1   30.20    2.30
   0  14   1   28.30    1.60
  -1 -14  -1   57.79    2.90
   1  14   1   53.79    2.90
   1  14   1   50.99    2.40
   1  14   1   50.09    3.20
  -2 -14  -1   56.59    2.70
   2  14   1   51.59    3.20
   2  14   1   57.39    3.10
   2  14   1   56.29    2.60
  -3 -14  -1   21.30    1.60
  -3 -14  -1   23.50    1.60
   3  14   1   20.50    2.20
   3  14   1   19.50    1.90
  -4 -14  -1    0.30    0.50
  -4 -14  -1    0.40    0.60
   4  14   1    0.30    0.80
   4  14   1    0.30    0.80
  -5 -14  -1    1.20    0.50
  -5 -14  -1    0.90    0.50
  -5 -14  -1    0.30    0.50
   5  14   1    0.60    0.90
   5  14   1    1.40    0.80
   6  14   1   74.59    3.90
   6  14   1   76.49    3.20
   6  14   1   70.89    4.00
  -7 -14  -1    2.70    0.70
   7  14   1    3.00    1.10
   7  14   1    1.70    1.10
   7  14   1    3.00    0.90
  -8 -14  -1    8.90    1.00
   8  14   1   11.70    1.70
   8  14   1   13.90    1.30
   8  14   1   10.40    1.60
   9  14   1    1.20    0.60
   9  14   1    0.70    0.90
   9  14   1    2.30    1.00
  -2 -15  -1   16.00    1.70
   2  15   1   16.20    2.00
   2  15   1   12.00    1.80
  -3 -15  -1   32.30    2.00
   3  15   1   35.30    2.40
   3  15   1   31.50    2.70
  -4 -15  -1   16.20    1.30
  -4 -15  -1   21.20    1.40
   4  15   1   10.20    1.70
   4  15   1   14.90    1.80
  -5 -15  -1   26.40    1.40
   5  15   1   26.90    2.90
   5  15   1   23.60    2.40
  -6 -15  -1   17.60    1.50
   6  15   1   16.50    2.10
   6  15   1   17.00    1.90
   6  15   1   19.00    2.10
  -7 -15  -1   25.30    1.60
   7  15   1   22.20    1.90
   7  15   1   22.00    3.10
   5  15  -2   16.10    1.90
   5  15  -2   16.20    2.70
   4  15  -2    0.70    0.90
   4  15  -2    0.20    0.70
  -4 -15   2   -0.30    0.50
   3  15  -2    0.50    0.90
   3  15  -2    1.50    0.90
  -3 -15   2    0.00    0.60
  -3 -15   2   -0.30    0.70
   2  15  -2    6.80    1.50
   2  15  -2    4.60    1.20
  -2 -15   2    6.60    1.20
   8  14  -2   26.80    1.70
   8  14  -2   31.90    2.60
   8  14  -2   28.70    1.80
   7  14  -2   18.90    1.50
   7  14  -2   19.10    1.50
   7  14  -2   15.70    2.00
   6  14  -2   13.10    1.90
   6  14  -2   14.40    1.40
   6  14  -2   12.60    1.30
   5  14  -2    8.40    2.00
   5  14  -2    8.20    1.20
   5  14  -2    6.20    1.10
  -5 -14   2    7.90    0.80
   4  14  -2    2.50    1.40
   4  14  -2    1.50    0.90
  -4 -14   2    1.10    0.50
  -4 -14   2    2.30    0.60
   3  14  -2   -0.30    0.80
   3  14  -2    0.10    0.70
  -3 -14   2   -0.50    0.50
   2  14  -2   -0.10    0.80
   2  14  -2    0.80    0.80
  -2 -14   2   -0.40    0.60
   1  14  -2   58.69    3.00
   1  14  -2   55.99    3.20
   1  14  -2   53.79    2.50
  -1 -14   2   53.19    2.70
   0  14  -2    2.30    1.00
   0  14  -2    0.20    0.80
   0 -14   2    2.60    1.00
  -1  14  -2    5.60    1.30
   1 -14   2    6.70    1.40
   9  13  -2   66.49    3.20
   9  13  -2   66.39    2.70
   9  13  -2   70.99    3.70
   9  13  -2   68.89    3.60
   9  13  -2   70.49    2.70
   8  13  -2    2.60    0.70
   8  13  -2    2.00    0.70
  -8 -13   2    2.30    0.60
   7  13  -2   20.00    2.10
   7  13  -2   24.20    1.60
   7  13  -2   25.40    1.70
  -7 -13   2   24.10    1.60
   6  13  -2    1.10    0.70
   6  13  -2    0.40    0.60
   6  13  -2    1.10    0.70
  -6 -13   2    1.80    0.60
   5  13  -2  245.08    7.60
   5  13  -2  240.18    6.60
   5  13  -2  245.48    6.70
  -5 -13   2  238.58    5.30
  -5 -13   2  244.08    5.30
  -5 -13   2  241.48    6.60
   4  13  -2    7.90    1.30
   4  13  -2   10.00    1.40
   4  13  -2   13.20    1.30
  -4 -13   2   12.10    1.00
  -4 -13   2   12.60    1.30
  -4 -13   2   11.80    1.00
   3  13  -2   23.10    2.10
   3  13  -2   24.10    1.80
  -3 -13   2   21.90    1.40
  -3 -13   2   24.70    1.50
   2  13  -2    0.20    0.70
   2  13  -2   -0.10    0.70
   2  13  -2    0.20    0.60
  -2 -13   2   -0.10    0.50
  -2 -13   2    1.10    0.70
   1  13  -2   31.90    2.30
   1  13  -2   33.70    2.20
  -1 -13   2   32.10    2.00
   0  13  -2   14.40    1.70
   0  13  -2   10.20    1.10
   0  13  -2   11.50    1.60
   0 -13   2   11.90    1.50
  -1  13  -2   17.00    1.80
  -1  13  -2   16.80    1.30
  -1  13  -2   19.20    1.90
   1 -13   2   18.00    1.90
  -2  13  -2    2.70    1.10
  -2  13  -2    3.90    1.10
  -3  13  -2    0.60    0.90
  -3  13  -2    4.00    1.10
   3 -13   2    1.70    1.10
  10  12  -2   55.89    2.30
  10  12  -2   57.49    4.90
  10  12  -2   49.70    3.40
  10  12  -2   52.89    2.10
  10  12  -2   55.29    2.30
   9  12  -2   25.50    1.70
   9  12  -2   25.00    2.20
   9  12  -2   23.10    2.10
   9  12  -2   26.50    1.90
   9  12  -2   22.80    1.40
   8  12  -2    6.60    1.40
   8  12  -2    7.40    1.00
   8  12  -2    6.40    0.90
   8  12  -2    6.60    0.90
   7  12  -2    6.90    1.70
   7  12  -2    7.40    1.40
   7  12  -2    9.20    1.10
   7  12  -2    9.00    1.10
   6  12  -2   44.70    2.30
   6  12  -2   44.30    2.10
   6  12  -2   41.10    2.00
   6  12  -2   46.20    2.70
   5  12  -2    1.80    0.80
   5  12  -2    0.70    0.60
   5  12  -2    2.10    0.80
   4  12  -2    0.80    0.70
   4  12  -2    1.60    0.70
   4  12  -2    0.40    0.60
   4  12  -2    1.60    0.70
   4  12  -2    1.50    0.80
  -4 -12   2    0.30    0.40
  -4 -12   2    0.60    0.40
   3  12  -2   15.00    1.70
   3  12  -2   11.50    1.20
   3  12  -2   11.30    1.50
   3  12  -2   15.20    1.40
  -3 -12   2   11.10    1.10
  -3 -12   2   12.40    1.10
   2  12  -2    1.30    0.80
   2  12  -2    2.10    0.80
  -2 -12   2    0.50    0.60
  -2 -12   2    1.70    0.60
  -2 -12   2    1.70    0.60
   1  12  -2   11.80    1.60
   1  12  -2    9.60    1.30
   1  12  -2   11.30    1.30
  -1 -12   2   12.70    1.40
  -1 -12   2    6.70    1.10
   0  12  -2   48.30    2.10
   0  12  -2   44.70    2.60
   0  12  -2   52.89    2.60
   0 -12   2   51.09    2.40
   0 -12   2   44.50    2.40
  -1  12  -2   58.89    2.90
  -1  12  -2   58.29    2.20
  -1  12  -2   59.79    2.90
   1 -12   2   57.49    2.90
  -2  12  -2   14.50    1.70
  -2  12  -2   15.10    1.60
   2 -12   2    9.60    1.60
  -3  12  -2    2.30    0.90
  -3  12  -2    5.10    1.20
   3 -12   2    3.20    1.20
  -4  12  -2   13.90    1.70
  -4  12  -2   11.30    1.50
   4 -12   2   14.40    1.90
  11  11  -2   26.20    1.20
  11  11  -2   24.10    1.50
  11  11  -2   22.40    2.00
  11  11  -2   26.80    2.10
  10  11  -2    3.40    0.70
  10  11  -2    3.50    0.90
  10  11  -2    3.10    1.00
  10  11  -2    4.50    1.10
  10  11  -2    3.60    0.60
   9  11  -2    1.70    0.60
   9  11  -2    2.70    0.90
   9  11  -2    2.70    0.60
   9  11  -2    2.00    0.90
   9  11  -2    2.40    0.70
   8  11  -2    6.20    0.90
   8  11  -2    6.70    1.30
   8  11  -2    4.90    0.80
   8  11  -2    5.40    0.80
   7  11  -2    0.50    0.50
   7  11  -2    0.00    0.40
   7  11  -2    0.70    0.60
   7  11  -2    0.60    0.70
  -7 -11   2   -0.10    0.40
   6  11  -2   27.50    1.60
   6  11  -2   29.80    1.60
   6  11  -2   29.00    2.10
   6  11  -2   27.80    1.70
  -6 -11   2   28.10    1.60
   5  11  -2   70.79    2.60
   5  11  -2   71.19    2.70
   5  11  -2   68.89    2.80
   5  11  -2   70.99    3.10
   5  11  -2   71.39    3.30
  -5 -11   2   70.29    2.70
   4  11  -2    5.10    0.90
   4  11  -2    5.70    1.00
   4  11  -2    4.50    1.00
   4  11  -2    6.00    1.10
  -4 -11   2    4.10    0.80
  -4 -11   2    3.10    0.60
  -4 -11   2    4.50    0.60
   3  11  -2   34.40    2.10
   3  11  -2   32.40    2.10
   3  11  -2   30.40    1.80
   3  11  -2   31.60    1.90
  -3 -11   2   32.70    1.60
  -3 -11   2   29.90    1.70
   2  11  -2    7.70    1.10
   2  11  -2    9.20    1.10
   2  11  -2   10.90    1.50
   2  11  -2    8.60    1.30
  -2 -11   2    9.90    1.20
  -2 -11   2    7.90    1.00
   1  11  -2   23.20    1.90
   1  11  -2   24.40    1.50
   1  11  -2   26.80    1.80
   1  11  -2   27.10    2.00
  -1 -11   2   29.00    1.70
  -1 -11   2   29.10    2.10
  -1 -11   2   26.90    1.70
   0  11  -2    7.90    1.30
   0  11  -2    7.70    1.30
   0  11  -2    6.00    1.00
   0  11  -2    8.40    1.00
   0 -11   2    6.00    1.20
   0 -11   2    7.40    1.00
   0 -11   2    7.20    1.30
  -1  11  -2   10.70    1.40
  -1  11  -2   10.20    1.00
  -1  11  -2    7.80    1.20
   1 -11   2   11.10    1.50
   1 -11   2   10.60    1.40
   1 -11   2   12.60    1.30
   1 -11   2   10.40    1.30
  -2  11  -2    2.10    0.70
  -2  11  -2    2.00    0.80
  -2  11  -2    0.40    0.70
   2 -11   2    0.80    0.90
   2 -11   2    1.20    0.70
  -3  11  -2    1.30    0.80
  -3  11  -2   -0.40    0.50
  -3  11  -2   -0.10    0.60
   3 -11   2    0.70    0.90
   3 -11   2    0.80    0.60
  -4  11  -2   12.30    1.50
  -4  11  -2   14.40    1.70
  -4  11  -2   10.00    1.20
   4 -11   2   11.70    1.70
   4 -11   2   13.40    1.40
  -5  11  -2    7.70    1.20
  -5  11  -2    7.80    1.10
  -5  11  -2    5.90    1.20
   5 -11   2    6.00    1.10
   5 -11   2    5.60    1.40
  -6  11  -2    4.80    0.90
  -6  11  -2    1.70    0.90
  -6  11  -2    1.50    0.90
  11  10  -2   11.00    1.40
  11  10  -2   14.30    0.90
  11  10  -2   13.00    1.70
  11  10  -2   15.10    1.20
  10  10  -2   61.99    2.20
  10  10  -2   64.39    2.50
  10  10  -2   66.49    3.20
  10  10  -2   64.29    3.00
  10  10  -2   62.59    2.00
   9  10  -2    0.40    0.70
   9  10  -2    0.60    0.70
   9  10  -2    0.50    0.50
   9  10  -2   -0.30    0.40
   9  10  -2    1.00    0.40
   8  10  -2   47.50    2.10
   8  10  -2   44.80    2.60
   8  10  -2   49.50    2.00
   8  10  -2   46.10    1.80
   7  10  -2   45.80    2.60
   7  10  -2   44.00    2.00
   7  10  -2   44.50    2.00
   7  10  -2   45.30    1.80
  -7 -10   2   44.30    2.00
   6  10  -2    0.00    0.40
   6  10  -2    0.00    0.30
   6  10  -2   -0.20    0.40
   6  10  -2    0.00    0.50
   6  10  -2   -0.40    0.50
  -6 -10   2    0.50    0.40
   5  10  -2   35.50    2.60
   5  10  -2   30.70    1.60
   5  10  -2   32.90    1.70
   5  10  -2   31.20    1.80
  -5 -10   2   32.30    1.60
   4  10  -2   24.70    1.80
   4  10  -2   22.80    1.60
   4  10  -2   23.40    1.40
   4  10  -2   22.20    1.60
   4  10  -2   25.00    1.50
  -4 -10   2   23.70    1.00
  -4 -10   2   22.20    1.40
   3  10  -2    1.50    0.60
   3  10  -2    2.40    0.70
   3  10  -2    1.70    0.70
   3  10  -2    3.00    0.80
   3  10  -2    2.50    0.80
  -3 -10   2    2.30    0.60
  -3 -10   2    2.60    0.60
   2  10  -2    9.00    1.20
   2  10  -2    8.90    1.20
   2  10  -2   10.20    1.20
   2  10  -2    8.80    1.20
   2  10  -2   12.20    1.50
  -2 -10   2    8.70    1.00
  -2 -10   2    8.90    1.00
  -2 -10   2    7.90    1.00
  -2 -10   2    7.20    1.10
   1  10  -2  275.47    7.40
   1  10  -2  279.57    7.50
   1  10  -2  279.37    7.10
   1  10  -2  273.97    6.90
   1  10  -2  272.97    7.00
  -1 -10   2  273.27    7.00
  -1 -10   2  271.57    7.50
  -1 -10   2  275.47    7.00
  -1 -10   2  272.37    6.90
   0  10  -2    1.00    0.70
   0  10  -2   -0.40    0.50
   0  10  -2    1.10    0.70
   0  10  -2    1.70    0.60
   0 -10   2    2.40    0.80
   0 -10   2    1.70    0.60
   0 -10   2    1.80    0.70
   0 -10   2    0.80    0.60
  -1  10  -2   80.09    3.10
  -1  10  -2   83.69    2.70
  -1  10  -2   80.69    3.20
   1 -10   2   83.79    3.30
   1 -10   2   82.79    3.30
  -2  10  -2   83.59    2.60
  -2  10  -2   88.79    3.30
  -2  10  -2   91.19    3.40
   2 -10   2   85.59    3.30
   2 -10   2   87.19    3.30
   2 -10   2   85.69    3.40
   2 -10   2   93.59    3.60
  -3  10  -2    0.40    0.60
  -3  10  -2    0.40    0.70
   3 -10   2   -0.90    0.70
   3 -10   2   -0.40    0.50
  -4  10  -2   21.70    1.80
  -4  10  -2   22.00    1.70
   4 -10   2   22.60    1.70
   4 -10   2   22.90    2.10
  -5  10  -2    0.10    0.70
  -5  10  -2    0.50    0.60
   5 -10   2    0.10    1.00
   5 -10   2    1.10    0.60
  -6  10  -2   58.49    2.50
  -6  10  -2   58.59    2.80
   6 -10   2   53.09    2.60
  -7  10  -2    2.90    1.00
   7 -10   2    2.30    1.20
  12   9  -2   -0.40    0.60
  12   9  -2   -0.10    0.50
  12   9  -2    1.20    0.50
  11   9  -2   10.30    1.20
  11   9  -2   11.80    0.70
  11   9  -2    8.60    1.30
  11   9  -2    9.40    1.30
  11   9  -2    9.80    0.60
  10   9  -2   76.39    3.30
  10   9  -2   72.79    2.10
  10   9  -2   72.89    3.10
  10   9  -2   74.79    2.70
  10   9  -2   71.99    2.20
   9   9  -2    3.00    0.60
   9   9  -2    2.30    0.70
   9   9  -2    2.10    0.80
   9   9  -2    2.90    0.60
   9   9  -2    3.40    0.60
   8   9  -2    0.00    0.30
   8   9  -2    0.60    0.50
   8   9  -2    0.40    0.40
   8   9  -2    0.30    0.60
   8   9  -2    0.10    0.40
   7   9  -2   36.50    2.20
   7   9  -2   37.30    1.70
   7   9  -2   33.60    1.50
   7   9  -2   34.10    1.60
   6   9  -2  574.84   12.60
   6   9  -2  571.34   12.30
   6   9  -2  550.44   13.40
  -6  -9   2  549.65   12.50
   5   9  -2   73.09    3.10
   5   9  -2   75.59    3.00
   5   9  -2   73.99    2.60
   5   9  -2   75.39    2.50
   5   9  -2   77.19    2.60
  -5  -9   2   72.59    2.60
   4   9  -2   60.09    2.70
   4   9  -2   56.99    2.50
   4   9  -2   58.69    2.20
   4   9  -2   58.79    2.20
   4   9  -2   57.99    2.30
  -4  -9   2   60.59    2.20
  -4  -9   2   60.99    1.70
  -4  -9   2   58.49    1.70
   3   9  -2  347.37    8.40
   3   9  -2  350.76    8.90
   3   9  -2  355.16    8.30
   3   9  -2  351.16    8.30
   3   9  -2  350.76    8.60
  -3  -9   2  354.36    7.90
  -3  -9   2  333.67    8.20
  -3  -9   2  345.47    7.80
   2   9  -2   93.79    3.10
   2   9  -2   95.59    3.30
   2   9  -2   99.09    3.50
   2   9  -2   96.19    3.10
   2   9  -2   96.09    3.20
  -2  -9   2   96.39    3.00
  -2  -9   2   95.29    3.60
  -2  -9   2   95.19    3.10
  -2  -9   2   95.59    2.90
   1   9  -2   19.80    1.30
   1   9  -2   18.50    1.50
   1   9  -2   19.30    1.30
   1   9  -2   22.30    1.40
   1   9  -2   19.90    1.50
  -1  -9   2   18.70    1.30
  -1  -9   2   20.50    1.60
  -1  -9   2   20.10    1.40
  -1  -9   2   18.90    1.30
   0   9  -2   71.89    2.70
   0   9  -2   73.89    2.70
   0   9  -2   75.29    2.90
   0   9  -2   69.49    2.90
   0   9  -2   72.59    2.50
   0  -9   2   71.99    2.90
   0  -9   2   73.79    2.80
   0  -9   2   71.89    2.60
   0  -9   2   74.29    2.70
  -1   9  -2  156.58    4.70
  -1   9  -2  156.28    4.60
  -1   9  -2  159.98    4.20
   1  -9   2  159.28    4.80
   1  -9   2  157.88    4.80
   1  -9   2  151.08    4.50
   1  -9   2  157.58    4.60
  -2   9  -2   96.29    3.30
  -2   9  -2   87.89    2.60
  -2   9  -2   91.79    3.30
   2  -9   2   95.99    3.50
   2  -9   2   92.39    3.40
  -3   9  -2    2.40    0.80
  -3   9  -2    2.10    0.70
  -3   9  -2    1.70    0.70
  -3   9  -2    0.00    0.30
   3  -9   2    2.20    0.70
   3  -9   2    0.80    0.50
   3  -9   2    0.50    0.30
   3  -9   2    0.80    0.80
  -4   9  -2   -0.50    0.50
  -4   9  -2   -0.10    0.50
  -4   9  -2    0.00    0.50
  -4   9  -2    1.20    0.80
   4  -9   2    0.80    0.90
   4  -9   2    0.40    0.50
   4  -9   2    0.40    0.50
  -5   9  -2    0.60    0.60
  -5   9  -2   -0.10    0.50
  -5   9  -2    0.00    0.50
  -5   9  -2    0.40    0.70
   5  -9   2    0.60    0.50
   5  -9   2    1.00    0.90
  -6   9  -2    6.50    1.10
  -6   9  -2    7.00    1.00
  -6   9  -2    6.30    0.90
   6  -9   2    6.20    1.40
   6  -9   2    6.20    0.90
  -7   9  -2   53.99    2.60
  -7   9  -2   51.89    2.20
   7  -9   2   50.39    2.30
   7  -9   2   56.29    4.10
  -8   9  -2   16.30    1.60
  -8   9  -2   23.60    1.80
   8  -9   2   28.80    2.50
  12   8  -2    0.70    0.60
  12   8  -2    0.60    0.70
  12   8  -2    1.40    0.60
  11   8  -2    6.10    0.90
  11   8  -2    7.20    1.10
  11   8  -2    5.70    1.00
  10   8  -2    0.00    0.50
  10   8  -2    0.50    0.30
  10   8  -2    0.50    0.20
  10   8  -2    1.10    0.70
  10   8  -2    0.40    0.40
   9   8  -2   57.89    2.60
   9   8  -2   60.79    1.70
   9   8  -2   58.49    1.80
   9   8  -2   57.69    2.30
   9   8  -2   58.09    3.20
   9   8  -2   57.59    3.10
   8   8  -2   36.10    1.40
   8   8  -2   40.20    2.20
   8   8  -2   37.30    1.80
   8   8  -2   37.90    2.10
   8   8  -2   38.00    1.30
   8   8  -2   37.20    2.20
   7   8  -2    9.70    0.70
   7   8  -2   10.20    0.90
   7   8  -2   10.00    1.30
   7   8  -2    9.60    1.30
   7   8  -2   10.50    1.00
   6   8  -2    9.50    1.00
   6   8  -2    9.10    0.90
   6   8  -2    7.80    1.20
   6   8  -2    7.10    0.80
  -6  -8   2    8.50    0.90
   5   8  -2  355.86    8.10
   5   8  -2  320.67    8.50
   5   8  -2  336.47    7.90
   5   8  -2  337.37    8.70
   5   8  -2  352.26    7.80
  -5  -8   2  368.36    8.90
   4   8  -2   40.80    1.80
   4   8  -2   38.60    2.00
   4   8  -2   37.80    1.60
   4   8  -2   38.70    1.60
   4   8  -2   39.00    1.90
  -4  -8   2   39.30    1.10
  -4  -8   2   42.40    2.00
  -4  -8   2   39.10    1.10
   3   8  -2   56.59    2.30
   3   8  -2   53.99    2.00
   3   8  -2   59.89    2.50
   3   8  -2   55.89    2.10
  -3  -8   2   54.69    1.80
  -3  -8   2   56.69    1.80
   2   8  -2  137.79    3.80
   2   8  -2  139.39    4.30
   2   8  -2  141.69    4.00
   2   8  -2  140.89    4.00
   2   8  -2  131.59    3.80
  -2  -8   2  137.89    4.30
  -2  -8   2  136.49    3.70
  -2  -8   2  136.19    3.60
  -2  -8   2  145.79    3.90
   1   8  -2    6.50    0.90
   1   8  -2    7.80    0.90
   1   8  -2    4.10    0.60
   1   8  -2    7.80    1.00
   1   8  -2    9.40    1.10
  -1  -8   2    5.60    0.90
  -1  -8   2    8.70    0.90
  -1  -8   2    6.30    0.80
  -1  -8   2    5.40    0.80
   0   8  -2  146.99    4.20
   0   8  -2  148.99    4.00
   0   8  -2  153.08    4.40
   0   8  -2  144.49    4.20
   0   8  -2  148.19    4.40
   0  -8   2  146.29    4.10
   0  -8   2  150.98    4.30
   0  -8   2  148.49    4.50
   0  -8   2  145.89    4.10
  -1   8  -2    0.30    0.50
  -1   8  -2   -0.10    0.40
  -1   8  -2    0.00    0.50
  -1   8  -2    0.30    0.50
   1  -8   2   -0.40    0.40
   1  -8   2    0.10    0.50
   1  -8   2    0.10    0.40
   1  -8   2   -0.10    0.60
  -2   8  -2   94.69    3.20
  -2   8  -2   92.19    3.30
  -2   8  -2   93.09    3.10
  -2   8  -2   93.59    2.60
   2  -8   2   96.39    3.40
   2  -8   2   93.79    3.30
   2  -8   2   93.79    3.20
   2  -8   2   97.49    3.20
  -3   8  -2    9.40    1.10
  -3   8  -2    9.80    1.10
  -3   8  -2    8.90    1.30
  -3   8  -2   10.70    1.10
   3  -8   2    8.80    1.00
   3  -8   2   11.30    1.40
  -4   8  -2   20.80    1.50
  -4   8  -2   24.70    1.50
  -4   8  -2   23.00    1.50
   4  -8   2   22.10    1.50
  -5   8  -2    3.10    0.70
  -5   8  -2    3.10    0.70
  -5   8  -2    3.90    1.10
   5  -8   2    2.00    0.70
   5  -8   2    2.90    0.70
   5  -8   2    3.50    1.00
  -6   8  -2   45.10    2.30
  -6   8  -2   42.90    1.90
  -6   8  -2   42.40    2.00
  -6   8  -2   45.20    2.20
   6  -8   2   43.70    2.00
   6  -8   2   44.30    2.60
  -7   8  -2   23.40    1.70
  -7   8  -2   20.60    1.30
  -7   8  -2   22.40    1.70
   7  -8   2   25.10    2.20
   7  -8   2   20.10    1.40
  -8   8  -2   26.60    1.50
  -8   8  -2   31.90    1.90
  -8   8  -2   27.60    1.80
   8  -8   2   28.00    2.30
  -9   8  -2    2.60    1.00
   9  -8   2    0.40    1.00
  12   7  -2    8.50    1.20
  12   7  -2   11.60    1.20
  12   7  -2   10.40    1.20
  11   7  -2    3.60    0.90
  11   7  -2    3.70    0.80
  11   7  -2    3.30    0.80
  10   7  -2   89.59    3.10
  10   7  -2   92.09    3.50
  10   7  -2   88.69    3.20
   9   7  -2   42.60    1.30
   9   7  -2   46.30    2.00
   9   7  -2   46.40    2.30
   9   7  -2   45.80    2.40
   9   7  -2   45.40    1.30
   9   7  -2   44.80    2.10
   8   7  -2   85.69    2.90
   8   7  -2   84.59    3.10
   8   7  -2   88.89    2.30
   8   7  -2   85.89    2.20
   8   7  -2   91.19    3.40
   8   7  -2   85.89    3.30
   7   7  -2   17.60    0.90
   7   7  -2   18.20    0.80
   7   7  -2   19.20    1.50
   7   7  -2   16.80    1.40
   7   7  -2   17.40    1.20
   6   7  -2   20.10    1.20
   6   7  -2   19.10    1.00
   6   7  -2   17.80    0.90
   6   7  -2   17.20    1.40
   6   7  -2   19.40    1.40
   5   7  -2   34.10    1.30
   5   7  -2   33.60    1.40
   5   7  -2   35.20    1.80
   5   7  -2   33.20    1.80
   5   7  -2   36.10    1.50
  -5  -7   2   34.40    1.50
   4   7  -2   56.49    2.40
   4   7  -2   54.49    2.00
   4   7  -2   55.29    2.20
   4   7  -2   56.59    2.10
   4   7  -2   54.79    1.90
  -4  -7   2   55.89    2.30
  -4  -7   2   59.49    2.00
   3   7  -2  197.58    4.90
   3   7  -2  201.78    5.50
   3   7  -2  200.38    5.30
   3   7  -2  197.28    5.00
   3   7  -2  202.68    5.00
  -3  -7   2  196.28    5.30
  -3  -7   2  207.38    4.60
  -3  -7   2  203.68    4.60
  -3  -7   2  202.78    5.00
   2   7  -2   52.59    1.90
   2   7  -2   52.19    2.20
   2   7  -2   52.39    1.90
   2   7  -2   53.99    2.10
   2   7  -2   54.19    2.00
  -2  -7   2   52.99    1.90
  -2  -7   2   51.79    2.10
  -2  -7   2   52.99    1.70
  -2  -7   2   55.19    2.30
  -2  -7   2   58.69    2.30
   1   7  -2   73.29    2.40
   1   7  -2   68.09    2.30
   1   7  -2   67.49    2.30
   1   7  -2   70.69    2.50
   1   7  -2   72.29    2.60
  -1  -7   2   69.49    2.20
  -1  -7   2   69.69    2.30
  -1  -7   2   70.29    2.40
  -1  -7   2   67.49    2.30
   0   7  -2   81.89    2.70
   0   7  -2   83.69    2.90
   0   7  -2   88.79    2.60
   0   7  -2   88.89    2.90
   0   7  -2   81.89    2.70
   0  -7   2   87.29    3.00
   0  -7   2   87.89    2.80
   0  -7   2   86.09    2.70
  -1   7  -2  148.39    4.20
  -1   7  -2  149.59    3.80
  -1   7  -2  148.99    4.20
  -1   7  -2  151.48    4.40
  -1   7  -2  158.38    4.30
   1  -7   2  150.88    4.20
   1  -7   2  153.28    4.20
   1  -7   2  150.18    4.30
   1  -7   2  156.38    4.40
  -2   7  -2   79.09    2.70
  -2   7  -2   80.39    2.20
  -2   7  -2   76.99    2.90
  -2   7  -2   81.69    2.70
   2  -7   2   80.99    2.80
   2  -7   2   78.89    2.70
   2  -7   2   78.89    2.90
   2  -7   2   81.29    2.70
  -3   7  -2    0.80    0.50
  -3   7  -2    0.30    0.50
  -3   7  -2    0.60    0.60
  -3   7  -2   -0.10    0.40
   3  -7   2   -0.40    0.40
   3  -7   2   -0.30    0.30
   3  -7   2    0.60    0.70
   3  -7   2    0.50    0.50
  -4   7  -2    1.10    0.70
  -4   7  -2    1.60    0.70
  -4   7  -2    1.50    0.60
  -4   7  -2    1.00    0.50
   4  -7   2    1.10    0.80
   4  -7   2    1.60    0.50
  -5   7  -2   92.79    3.40
  -5   7  -2   97.49    3.10
  -5   7  -2   96.19    3.00
  -5   7  -2   98.09    3.30
   5  -7   2  101.09    4.60
   5  -7   2  100.09    3.20
   5  -7   2  100.09    3.70
  -6   7  -2  166.18    4.50
  -6   7  -2  161.58    4.40
  -6   7  -2  155.78    4.90
  -6   7  -2  165.78    4.70
   6  -7   2  165.08    5.00
   6  -7   2  163.68    5.30
   6  -7   2  166.88    4.50
   6  -7   2  159.48    5.00
  -7   7  -2    1.40    0.70
  -7   7  -2    2.90    1.00
  -7   7  -2    2.30    0.60
   7  -7   2    2.00    0.50
   7  -7   2    2.10    1.00
  -8   7  -2   75.29    2.50
  -8   7  -2   75.29    3.50
   8  -7   2   75.29    2.50
   8  -7   2   79.89    3.60
  -9   7  -2   40.40    1.90
  -9   7  -2   39.90    1.90
  -9   7  -2   33.30    1.50
   9  -7   2   37.40    2.60
  12   6  -2    0.50    0.50
  12   6  -2   -0.20    0.40
  12   6  -2    0.40    0.50
  11   6  -2  121.49    4.10
  11   6  -2  122.59    4.00
  11   6  -2  114.39    3.70
  10   6  -2    2.30    0.70
  10   6  -2    2.10    0.80
  10   6  -2    0.90    0.60
  10   6  -2    2.20    0.60
   9   6  -2   11.80    1.10
   9   6  -2   12.30    1.10
   9   6  -2   13.10    1.30
   9   6  -2   12.30    1.30
   8   6  -2   11.30    1.20
   8   6  -2    8.40    0.40
   8   6  -2    9.30    1.20
   8   6  -2    9.50    1.00
   8   6  -2    9.60    1.00
   7   6  -2   13.60    0.70
   7   6  -2   13.10    1.20
   7   6  -2   12.60    1.20
   7   6  -2   12.40    1.00
   6   6  -2   99.69    3.30
   6   6  -2   97.99    2.40
   6   6  -2  100.89    2.50
   6   6  -2   96.19    3.30
   6   6  -2   99.09    3.00
  -6  -6   2  101.99    3.40
   5   6  -2   16.40    1.20
   5   6  -2   18.00    1.00
   5   6  -2   17.70    1.30
   5   6  -2   17.50    0.90
   5   6  -2   18.20    0.80
  -5  -6   2   18.20    1.10
  -5  -6   2   17.10    1.30
   4   6  -2   38.80    1.80
   4   6  -2   37.20    1.40
   4   6  -2   39.70    1.30
   4   6  -2   38.60    1.50
   4   6  -2   39.30    2.10
  -4  -6   2   39.80    1.80
  -4  -6   2   41.20    1.60
   3   6  -2   14.50    0.90
   3   6  -2   13.80    0.80
   3   6  -2   13.80    0.90
   3   6  -2   13.70    1.10
   3   6  -2   15.50    1.10
  -3  -6   2   14.90    0.90
  -3  -6   2   14.30    0.70
  -3  -6   2   14.80    0.60
  -3  -6   2   14.80    1.10
   2   6  -2   20.00    1.20
   2   6  -2   18.40    1.10
   2   6  -2   18.50    1.00
   2   6  -2   18.20    1.20
   2   6  -2   16.80    1.10
  -2  -6   2   18.80    0.90
  -2  -6   2   19.10    1.10
  -2  -6   2   18.40    1.00
   1   6  -2    7.20    0.80
   1   6  -2    6.30    0.70
   1   6  -2    5.40    0.70
   1   6  -2    6.40    0.70
   1   6  -2    5.10    0.60
  -1  -6   2    7.00    0.70
  -1  -6   2    6.80    0.90
  -1  -6   2    6.70    0.70
  -1  -6   2    6.90    0.70
   0   6  -2    4.10    0.60
   0   6  -2    3.80    0.60
   0   6  -2    3.80    0.60
   0   6  -2    4.00    0.60
   0   6  -2    4.00    0.70
   0  -6   2    3.30    0.50
   0  -6   2    4.50    0.60
   0  -6   2    2.80    0.60
   0  -6   2    4.00    0.70
   0  -6   2    3.50    0.60
  -1   6  -2  325.77    7.00
  -1   6  -2  304.37    7.30
  -1   6  -2  326.87    7.50
  -1   6  -2  308.67    7.40
  -1   6  -2  311.17    7.50
   1  -6   2  313.37    7.50
   1  -6   2  322.17    7.40
   1  -6   2  307.87    7.50
   1  -6   2  323.17    7.40
  -2   6  -2    9.00    0.90
  -2   6  -2    9.20    0.60
  -2   6  -2    9.40    1.10
  -2   6  -2   10.70    1.00
   2  -6   2    8.50    0.90
   2  -6   2   10.70    1.10
   2  -6   2   10.00    0.90
   2  -6   2    9.60    0.90
  -3   6  -2    8.20    0.80
  -3   6  -2    8.30    1.00
  -3   6  -2    8.20    0.90
  -3   6  -2    9.40    0.90
   3  -6   2    6.70    0.80
   3  -6   2    7.40    1.00
   3  -6   2    7.70    0.90
   3  -6   2    8.60    0.90
  -4   6  -2   16.60    1.20
  -4   6  -2   16.70    1.10
  -4   6  -2   17.70    1.40
  -4   6  -2   17.80    1.10
   4  -6   2   18.10    1.50
   4  -6   2   15.70    1.20
   4  -6   2   18.40    1.30
   4  -6   2   18.50    1.20
  -5   6  -2  191.68    5.00
  -5   6  -2  189.08    5.30
  -5   6  -2  200.98    5.20
  -5   6  -2  192.88    4.90
   5  -6   2  197.38    5.40
   5  -6   2  199.18    5.60
   5  -6   2  198.68    5.00
  -6   6  -2  364.16    8.40
  -6   6  -2  349.77    8.80
  -6   6  -2  360.46    8.20
  -6   6  -2  359.76    8.60
   6  -6   2  357.56    8.30
   6  -6   2  364.56    9.20
   6  -6   2  359.66    8.90
  -7   6  -2   56.19    2.40
  -7   6  -2   57.79    2.30
  -7   6  -2   60.79    2.20
   7  -6   2   57.49    2.10
   7  -6   2   60.39    2.60
   7  -6   2   58.29    2.70
   7  -6   2   61.59    2.90
  -8   6  -2   51.19    1.90
  -8   6  -2   50.39    2.30
  -8   6  -2   49.99    2.10
   8  -6   2   54.19    2.80
   8  -6   2   49.99    1.80
  -9   6  -2   29.00    1.30
  -9   6  -2   31.60    1.60
  -9   6  -2   29.00    1.50
   9  -6   2   28.30    2.30
 -10   6  -2   43.30    1.60
  10  -6   2   44.90    2.80
  12   5  -2   -0.20    0.50
  12   5  -2   -0.10    0.50
  12   5  -2   -0.20    0.40
  11   5  -2    0.50    0.50
  11   5  -2    1.00    0.50
  11   5  -2    2.30    0.80
  11   5  -2    0.40    0.60
  10   5  -2  102.69    3.20
  10   5  -2  100.19    3.50
  10   5  -2  111.29    3.70
   9   5  -2   33.70    1.80
   9   5  -2   31.60    1.90
   9   5  -2   33.00    1.60
   9   5  -2   32.50    1.70
   8   5  -2  155.48    4.20
   8   5  -2  150.88    4.30
   8   5  -2  153.18    4.50
   8   5  -2  146.89    4.50
   7   5  -2    8.20    0.90
   7   5  -2    6.90    0.90
   7   5  -2    7.90    0.90
   7   5  -2    7.50    1.00
   6   5  -2   68.69    2.60
   6   5  -2   71.09    1.70
   6   5  -2   67.59    2.30
   6   5  -2   67.99    2.60
   6   5  -2   70.19    1.70
  -6  -5   2   72.49    2.60
   5   5  -2   74.59    1.90
   5   5  -2   71.29    2.30
   5   5  -2   73.19    1.80
   5   5  -2   71.09    2.60
  -5  -5   2   74.39    2.60
   4   5  -2   29.90    1.50
   4   5  -2   29.80    1.50
   4   5  -2   30.80    1.00
   4   5  -2   32.40    1.10
  -4  -5   2   29.20    1.50
  -4  -5   2   30.40    1.30
   3   5  -2   28.50    1.10
   3   5  -2   32.10    1.40
   3   5  -2   28.90    1.10
   3   5  -2   27.90    1.40
   3   5  -2   31.30    1.20
  -3  -5   2   30.80    0.80
  -3  -5   2   28.40    1.40
  -3  -5   2   29.60    1.20
  -3  -5   2   30.10    0.80
   2   5  -2    9.50    0.90
   2   5  -2    9.00    0.80
   2   5  -2    9.40    0.80
   2   5  -2   10.30    0.70
   2   5  -2    9.60    0.70
  -2  -5   2   11.00    0.60
  -2  -5   2    9.30    0.90
  -2  -5   2   10.20    0.70
  -2  -5   2   11.90    0.70
   1   5  -2  390.26    8.30
   1   5  -2  364.96    8.20
   1   5  -2  360.46    8.30
   1   5  -2  359.96    8.20
  -1  -5   2  385.66    8.20
  -1  -5   2  371.46    8.60
  -1  -5   2  364.66    8.40
  -1  -5   2  377.66    8.10
  -1  -5   2  390.36    8.30
   0   5  -2   15.50    0.90
   0   5  -2   15.90    1.00
   0   5  -2   13.60    1.00
   0  -5   2   15.20    0.90
   0  -5   2   15.20    0.90
   0  -5   2   15.60    0.90
   0  -5   2   15.40    1.00
   0  -5   2   16.20    1.00
  -1   5  -2  125.59    3.60
  -1   5  -2  132.69    3.50
  -1   5  -2  129.79    3.40
  -1   5  -2  134.29    3.20
   1  -5   2  130.29    3.20
   1  -5   2  122.69    3.50
   1  -5   2  134.09    3.40
   1  -5   2  123.59    3.50
   1  -5   2  129.79    3.40
  -2   5  -2  580.34   12.70
  -2   5  -2  588.74   12.90
  -2   5  -2  597.34   12.60
  -2   5  -2  594.54   12.70
  -2   5  -2  596.64   12.20
   2  -5   2  570.94   12.70
   2  -5   2  583.24   12.70
   2  -5   2  580.04   12.70
   2  -5   2  564.74   12.80
  -3   5  -2   35.60    1.70
  -3   5  -2   38.30    1.50
  -3   5  -2   36.60    1.40
  -3   5  -2   38.20    1.60
   3  -5   2   35.90    1.70
   3  -5   2   39.20    1.50
   3  -5   2   37.50    1.90
  -4   5  -2  197.38    5.00
  -4   5  -2  197.28    4.80
  -4   5  -2  196.58    4.90
   4  -5   2  204.58    4.90
   4  -5   2  192.88    5.30
   4  -5   2  198.08    5.10
  -5   5  -2   30.40    1.30
  -5   5  -2   30.80    1.60
  -5   5  -2   31.80    1.60
  -5   5  -2   29.30    1.40
   5  -5   2   30.70    1.60
   5  -5   2   30.80    1.30
   5  -5   2   33.10    1.80
   5  -5   2   29.70    1.60
  -6   5  -2    9.10    0.80
  -6   5  -2   10.10    0.90
  -6   5  -2    9.50    1.00
  -6   5  -2    7.90    1.00
   6  -5   2   10.80    1.20
   6  -5   2    9.40    1.10
   6  -5   2   10.20    1.30
   6  -5   2    9.60    0.80
  -7   5  -2   39.60    1.70
  -7   5  -2   46.50    2.00
  -7   5  -2   42.80    1.90
   7  -5   2   45.00    2.30
   7  -5   2   37.60    2.40
   7  -5   2   45.90    1.60
   7  -5   2   41.60    2.10
  -8   5  -2    6.80    0.80
  -8   5  -2    6.00    0.90
  -8   5  -2    6.10    0.80
   8  -5   2    7.80    1.10
   8  -5   2    6.60    0.60
   8  -5   2    7.20    1.30
   8  -5   2    5.30    1.20
  -9   5  -2    0.90    0.50
  -9   5  -2    0.40    0.50
  -9   5  -2    0.50    0.40
   9  -5   2    1.40    0.90
 -10   5  -2   10.00    0.60
 -10   5  -2    8.80    0.60
  10  -5   2    7.30    1.40
  11  -5   2   16.90    2.50
  12   4  -2   12.50    1.50
  12   4  -2   13.70    0.80
  12   4  -2   14.20    0.90
  12   4  -2   13.00    1.20
  12   4  -2   12.70    1.50
  11   4  -2   81.99    2.20
  11   4  -2   85.59    2.30
  11   4  -2   79.39    3.30
  11   4  -2   86.49    3.30
  11   4  -2   83.99    2.50
  11   4  -2   85.99    3.10
  10   4  -2   53.59    1.50
  10   4  -2   53.79    2.50
  10   4  -2   55.89    1.60
  10   4  -2   55.69    2.40
  10   4  -2   55.39    2.00
  10   4  -2   56.09    2.40
   9   4  -2    3.70    0.90
   9   4  -2    2.90    0.70
   9   4  -2    3.50    0.40
   9   4  -2    3.20    0.40
   9   4  -2    3.90    0.80
   9   4  -2    3.50    0.60
   8   4  -2    3.60    0.70
   8   4  -2    3.60    0.70
   8   4  -2    4.50    0.80
   8   4  -2    4.00    0.70
   7   4  -2   98.19    3.20
   7   4  -2  102.39    3.00
   7   4  -2   98.69    3.10
   7   4  -2   98.29    3.20
  -7  -4   2  102.59    3.30
   6   4  -2  129.89    3.80
   6   4  -2  124.79    3.50
   6   4  -2  131.99    4.20
  -6  -4   2  127.69    3.80
   5   4  -2    6.30    0.70
   5   4  -2    5.30    0.40
   5   4  -2    5.50    0.80
   5   4  -2    5.10    0.70
  -5  -4   2    6.00    0.80
   4   4  -2    4.10    0.50
   4   4  -2    3.30    0.50
   4   4  -2    4.30    0.70
   4   4  -2    3.70    0.40
   4   4  -2    4.80    0.30
  -4  -4   2    6.00    0.90
  -4  -4   2    3.60    0.50
   3   4  -2  126.89    3.60
   3   4  -2  134.19    3.40
   3   4  -2  142.79    3.20
   3   4  -2  136.69    3.60
  -3  -4   2  139.09    3.40
   2   4  -2   99.99    2.60
   2   4  -2   99.09    2.50
   2   4  -2  103.09    2.80
   2   4  -2   99.29    2.70
  -2  -4   2  105.39    2.40
  -2  -4   2  104.79    2.90
  -2  -4   2  102.29    2.40
  -2  -4   2  104.09    2.70
   1   4  -2   40.60    1.30
   1   4  -2   41.60    1.60
   1   4  -2   39.40    1.40
   1   4  -2   38.20    1.40
   1   4  -2   40.20    1.40
  -1  -4   2   39.70    1.40
  -1  -4   2   41.30    1.30
  -1  -4   2   41.50    1.30
  -1  -4   2   40.20    1.40
   0   4  -2  102.49    2.60
   0   4  -2   96.89    2.60
   0   4  -2   96.49    2.70
   0   4  -2   94.49    2.60
   0   4  -2  101.09    2.80
   0  -4   2   97.49    2.60
   0  -4   2  101.89    2.70
   0  -4   2   97.09    2.80
   0  -4   2  103.79    2.60
   0  -4   2   98.89    2.60
  -1   4  -2   40.60    1.60
  -1   4  -2   38.50    1.40
  -1   4  -2   38.00    1.40
  -1   4  -2   41.30    1.20
  -1   4  -2   38.90    1.40
   1  -4   2   39.40    1.40
   1  -4   2   38.10    1.40
   1  -4   2   38.50    1.50
   1  -4   2   38.50    1.50
   1  -4   2   42.90    1.30
  -2   4  -2   22.90    1.20
  -2   4  -2   22.10    1.00
  -2   4  -2   22.00    1.10
  -2   4  -2   22.10    1.10
   2  -4   2   22.20    1.20
   2  -4   2   22.60    0.80
   2  -4   2   20.90    1.00
   2  -4   2   21.30    1.10
   2  -4   2   21.50    1.10
  -3   4  -2  251.67    6.00
  -3   4  -2  258.07    5.80
  -3   4  -2  258.97    5.70
  -3   4  -2  248.98    5.80
   3  -4   2  242.08    6.00
   3  -4   2  235.18    5.90
   3  -4   2  244.38    5.90
   3  -4   2  250.67    5.70
  -4   4  -2   11.90    0.70
  -4   4  -2   11.40    0.80
  -4   4  -2   10.20    0.80
  -4   4  -2   11.10    0.90
   4  -4   2   10.60    1.00
   4  -4   2   10.70    0.70
   4  -4   2   10.50    1.00
   4  -4   2   11.80    0.90
  -5   4  -2   17.80    1.10
  -5   4  -2   18.40    0.90
  -5   4  -2   17.50    1.20
  -5   4  -2   15.80    1.00
   5  -4   2   16.40    1.20
   5  -4   2   18.20    0.90
   5  -4   2   15.50    1.30
   5  -4   2   18.40    1.20
  -6   4  -2   10.70    1.10
  -6   4  -2    8.50    0.90
  -6   4  -2    9.20    0.80
   6  -4   2    7.10    1.10
   6  -4   2    9.60    1.10
   6  -4   2    8.30    0.70
   6  -4   2    7.00    0.90
  -7   4  -2    0.00    0.50
  -7   4  -2   -0.20    0.40
  -7   4  -2    0.10    0.40
   7  -4   2    0.30    0.70
   7  -4   2    0.10    0.50
   7  -4   2    0.00    0.40
   7  -4   2    0.10    0.30
  -8   4  -2   27.80    1.40
  -8   4  -2   25.30    1.30
  -8   4  -2   26.00    1.20
   8  -4   2   25.30    1.70
   8  -4   2   28.30    1.90
   8  -4   2   28.30    1.00
   8  -4   2   28.60    1.70
  -9   4  -2   10.40    0.80
  -9   4  -2    8.50    0.90
  -9   4  -2   10.10    0.80
   9  -4   2    7.70    1.10
   9  -4   2   12.40    1.50
 -10   4  -2   31.40    1.20
  10  -4   2   39.40    2.30
  11  -4   2   -0.10    0.80
  12   3  -2    1.40    0.50
  12   3  -2    2.60    0.60
  12   3  -2    0.90    0.70
  12   3  -2    1.90    0.60
  12   3  -2    2.20    0.40
  11   3  -2   62.59    2.70
  11   3  -2   64.99    2.00
  11   3  -2   66.89    2.10
  11   3  -2   64.89    2.90
  11   3  -2   67.49    1.90
  11   3  -2   65.89    2.50
  10   3  -2   54.39    1.80
  10   3  -2   53.99    1.80
  10   3  -2   53.99    1.70
  10   3  -2   52.99    2.30
  10   3  -2   56.39    2.70
  10   3  -2   54.29    2.40
   9   3  -2    4.40    0.50
   9   3  -2    3.70    0.60
   9   3  -2    3.00    0.70
   9   3  -2    3.80    0.50
   9   3  -2    4.30    0.80
   9   3  -2    5.50    0.90
   8   3  -2  638.64   14.30
   8   3  -2  644.04   13.70
   8   3  -2  640.74   13.30
   8   3  -2  656.53   14.40
   8   3  -2  629.64   13.30
   7   3  -2  770.62   16.90
   7   3  -2  777.22   16.00
   7   3  -2  795.52   16.50
   7   3  -2  796.72   17.10
   7   3  -2  775.22   15.90
  -7  -3   2  773.22   17.00
   6   3  -2  402.96    8.70
   6   3  -2  374.56    8.90
   6   3  -2  397.86    9.10
  -6  -3   2  394.56    9.10
   5   3  -2   46.00    1.70
   5   3  -2   43.80    1.70
  -5  -3   2   49.99    1.90
   4   3  -2   46.50    1.60
   4   3  -2   48.90    1.10
   4   3  -2   45.50    1.70
   3   3  -2  824.12   16.80
   3   3  -2  799.92   17.10
   3   3  -2  790.62   17.00
   3   3  -2  824.62   16.50
  -3  -3   2  836.82   17.20
   2   3  -2 1074.09   73.39
   1   3  -2  103.29    2.50
   1   3  -2  103.29    2.70
   1   3  -2  103.39    2.60
   1   3  -2  102.89    2.80
   1   3  -2  103.69    2.60
  -1  -3   2  104.09    2.70
  -1  -3   2  104.19    2.50
  -1  -3   2  104.69    2.40
  -1  -3   2  105.29    2.60
   0   3  -2  534.45   11.60
   0  -3   2  550.84   11.60
   0  -3   2  548.95   11.50
   0  -3   2  559.34   11.50
  -1   3  -2  367.86    8.10
  -1   3  -2  391.36    7.90
  -1   3  -2  392.66    8.10
  -1   3  -2  377.66    8.20
  -1   3  -2  363.46    8.10
   1  -3   2  374.76    8.10
   1  -3   2  357.56    8.20
   1  -3   2  360.96    8.10
   1  -3   2  367.86    8.10
   1  -3   2  386.46    7.90
  -2   3  -2  294.67    6.60
  -2   3  -2  307.87    6.60
  -2   3  -2  297.97    6.60
  -2   3  -2  304.97    6.80
  -2   3  -2  304.37    6.70
   2  -3   2  298.37    6.80
   2  -3   2  283.17    6.70
   2  -3   2  295.67    6.60
   2  -3   2  298.57    6.70
   2  -3   2  312.37    6.30
  -3   3  -2  260.17    5.60
  -3   3  -2  253.97    5.80
  -3   3  -2  253.37    5.70
  -3   3  -2  257.07    5.90
   3  -3   2  257.87    5.60
   3  -3   2  251.07    5.90
   3  -3   2  237.08    5.80
   3  -3   2  248.68    6.00
  -4   3  -2  167.68    4.30
  -4   3  -2  170.48    3.80
  -4   3  -2  169.48    4.10
   4  -3   2  166.68    4.40
   4  -3   2  176.28    3.90
   4  -3   2  158.38    4.20
  -5   3  -2  176.78    4.30
  -5   3  -2  177.88    4.00
  -5   3  -2  173.88    4.20
  -5   3  -2  171.98    4.40
   5  -3   2  171.68    4.40
   5  -3   2  166.68    4.60
   5  -3   2  177.98    4.00
   5  -3   2  169.08    4.90
  -6   3  -2   49.40    1.70
  -6   3  -2   46.70    1.80
  -6   3  -2   49.90    1.70
   6  -3   2   49.70    1.40
   6  -3   2   47.70    1.90
   6  -3   2   49.80    2.10
   6  -3   2   50.39    2.00
  -7   3  -2  167.18    4.30
  -7   3  -2  173.38    4.20
  -7   3  -2  167.48    4.20
   7  -3   2  173.88    3.90
   7  -3   2  171.88    4.60
   7  -3   2  167.38    4.80
   7  -3   2  177.68    4.90
  -8   3  -2    0.50    0.40
  -8   3  -2    0.60    0.40
  -8   3  -2    1.10    0.50
   8  -3   2    1.20    0.80
   8  -3   2    0.10    0.50
   8  -3   2    1.30    0.60
  -9   3  -2    1.90    0.50
   9  -3   2    2.50    0.70
   9  -3   2    1.40    0.80
   9  -3   2    2.10    0.70
 -10   3  -2    6.70    0.60
  10  -3   2    6.60    1.00
  10  -3   2    7.20    1.20
  11  -3   2    2.30    0.90
  12  -3   2    2.50    1.00
  12   2  -2    5.50    0.80
  12   2  -2    3.60    0.70
  12   2  -2    5.60    0.70
  12   2  -2    2.90    0.90
  12   2  -2    4.60    0.70
  11   2  -2   43.30    2.40
  11   2  -2   44.80    1.70
  11   2  -2   43.90    1.90
  11   2  -2   43.70    1.80
  11   2  -2   44.20    2.00
  10   2  -2    0.40    0.50
  10   2  -2    0.20    0.40
  10   2  -2    0.30    0.60
  10   2  -2    0.00    0.40
  10   2  -2    0.00    0.40
   9   2  -2   92.69    2.40
   9   2  -2   91.09    2.50
   9   2  -2   93.69    2.60
   9   2  -2   94.99    3.10
   8   2  -2  292.67    6.40
   8   2  -2  286.07    7.10
   8   2  -2  293.07    6.40
   8   2  -2  284.37    6.40
   7   2  -2    7.40    0.90
   7   2  -2    7.80    0.50
   7   2  -2    7.60    0.60
   7   2  -2    6.70    0.60
  -7  -2   2    8.30    1.00
   6   2  -2   34.90    1.20
   6   2  -2   34.40    1.00
   6   2  -2   34.50    1.10
   6   2  -2   33.50    1.50
  -6  -2   2   36.00    1.50
   5   2  -2   63.89    1.60
   5   2  -2   63.59    1.80
   5   2  -2   64.09    1.50
   5   2  -2   58.99    2.00
   4   2  -2   64.99    2.10
   4   2  -2   67.09    1.50
   4   2  -2   65.69    1.50
   4   2  -2   64.89    2.00
  -4  -2   2   67.39    2.10
   3   2  -2   11.60    0.40
   3   2  -2   11.10    0.70
   3   2  -2   12.20    0.40
   3   2  -2   12.30    0.70
  -3  -2   2   11.20    0.70
   2   2  -2  246.98    5.50
   2   2  -2  235.68    5.20
   2   2  -2  243.08    5.40
   2   2  -2  243.78    5.10
  -2  -2   2  244.78    5.50
  -2  -2   2  251.47    5.40
   1   2  -2  300.57    6.30
   1   2  -2  301.47    6.40
   1   2  -2  295.57    6.40
  -1  -2   2  294.17    6.50
  -1  -2   2  301.07    6.30
  -1  -2   2  305.17    6.50
   0   2  -2  200.78    4.30
   0   2  -2  193.48    4.30
   0   2  -2  190.68    4.20
   0   2  -2  184.08    4.30
   0  -2   2  188.98    4.30
   0  -2   2  192.08    4.30
   0  -2   2  194.38    4.30
  -1   2  -2 2427.46  148.69
   1  -2   2 1896.01  119.59
  -2   2  -2  244.28    5.40
  -2   2  -2  227.68    5.30
  -2   2  -2  242.18    5.40
  -2   2  -2  251.07    5.40
  -2   2  -2  242.78    5.20
   2  -2   2  246.38    5.20
   2  -2   2  242.48    5.50
   2  -2   2  242.48    5.10
   2  -2   2  232.78    5.40
   2  -2   2  242.58    5.40
  -3   2  -2    6.40    0.60
  -3   2  -2    6.30    0.40
  -3   2  -2    5.00    0.60
  -3   2  -2    5.70    0.50
   3  -2   2    5.00    0.60
   3  -2   2    5.50    0.50
   3  -2   2    6.00    0.40
   3  -2   2    6.00    0.60
  -4   2  -2  236.68    5.40
  -4   2  -2  239.78    5.00
  -4   2  -2  235.78    5.30
  -4   2  -2  237.88    5.30
   4  -2   2  232.58    5.60
   4  -2   2  227.38    5.40
   4  -2   2  229.88    5.50
   4  -2   2  244.58    5.10
   4  -2   2  230.38    5.30
  -5   2  -2    8.30    0.60
  -5   2  -2    8.40    0.60
  -5   2  -2    7.90    0.70
   5  -2   2    7.00    0.80
   5  -2   2    7.10    0.70
   5  -2   2    8.10    0.70
   5  -2   2    8.00    0.70
   5  -2   2    9.10    0.60
  -6   2  -2    6.30    0.60
  -6   2  -2    6.50    0.60
  -6   2  -2    5.50    0.60
   6  -2   2    6.70    0.70
   6  -2   2    6.50    0.70
   6  -2   2    7.00    0.90
  -7   2  -2    0.90    0.40
  -7   2  -2    0.40    0.30
  -7   2  -2    0.70    0.30
   7  -2   2    0.60    0.40
   7  -2   2    0.20    0.60
   7  -2   2    0.60    0.40
  -8   2  -2    1.80    0.30
  -8   2  -2    2.20    0.50
   8  -2   2    1.60    0.70
   8  -2   2    1.50    0.60
   8  -2   2    2.00    0.60
  -9   2  -2   16.80    1.00
   9  -2   2   16.30    1.40
   9  -2   2   15.40    1.40
   9  -2   2   16.70    1.20
  10  -2   2    0.70    0.60
  10  -2   2    1.90    0.60
  10  -2   2    0.60    0.70
  11  -2   2   37.40    2.20
  11  -2   2   36.70    1.90
  12  -2   2    4.20    1.10
  12   1  -2   27.60    1.40
  12   1  -2   28.90    1.60
  12   1  -2   33.00    1.60
  11   1  -2    4.00    0.70
  11   1  -2    4.10    0.80
  11   1  -2    4.60    0.80
  11   1  -2    5.20    0.70
  10   1  -2   17.30    1.20
  10   1  -2   16.40    1.10
   9   1  -2   18.10    1.20
   9   1  -2   18.10    1.00
   9   1  -2   17.60    1.10
   8   1  -2    6.70    0.70
   8   1  -2    7.30    0.70
   8   1  -2    6.30    0.80
   7   1  -2    8.40    0.50
   7   1  -2    8.80    0.70
   7   1  -2    9.40    0.90
   7   1  -2    7.50    0.70
   6   1  -2  728.23   14.80
   6   1  -2  704.03   15.20
   6   1  -2  714.23   14.90
   6   1  -2  717.73   14.70
   5   1  -2   69.29    1.80
   5   1  -2   67.49    1.80
   5   1  -2   67.99    1.70
   5   1  -2   65.19    2.10
  -5  -1   2   69.39    2.10
   4   1  -2  113.09    3.00
   4   1  -2  116.99    2.70
   4   1  -2  118.59    2.70
   4   1  -2  121.19    2.70
  -4  -1   2  117.29    3.10
   3   1  -2  720.13   15.20
   3   1  -2  741.63   14.90
   2   1  -2   24.40    0.70
   2   1  -2   23.10    0.70
   2   1  -2   22.90    0.90
   2   1  -2   25.00    0.90
  -2  -1   2   25.00    0.90
   1   1  -2  674.93   48.30
  -1  -1   2  702.73   48.70
   0   1  -2   93.39    2.10
   0   1  -2   92.69    2.20
   0   1  -2   92.29    2.20
   0   1  -2   94.99    2.20
   0  -1   2   93.09    2.20
   0  -1   2   88.49    2.20
   0  -1   2   94.49    2.10
  -1   1  -2 3805.22  153.18
  -2   1  -2  648.94   13.20
  -2   1  -2  642.34   13.20
   2  -1   2  624.74   13.30
  -3   1  -2    5.30    0.50
  -3   1  -2    5.60    0.50
  -3   1  -2    6.20    0.50
   3  -1   2    5.60    0.50
   3  -1   2    5.70    0.50
   3  -1   2    5.40    0.50
   3  -1   2    6.60    0.60
  -4   1  -2    0.40    0.30
  -4   1  -2    1.60    0.30
  -4   1  -2   -0.10    0.20
   4  -1   2    0.40    0.30
   4  -1   2    0.10    0.40
   4  -1   2    0.80    0.30
  -5   1  -2  523.35   11.00
  -5   1  -2  536.55   11.20
  -5   1  -2  525.05   10.90
   5  -1   2  508.45   11.20
   5  -1   2  509.15   11.30
   5  -1   2  547.75   10.90
   5  -1   2  522.35   11.10
  -6   1  -2  236.98    5.20
  -6   1  -2  238.58    5.40
  -6   1  -2  238.68    5.10
   6  -1   2  238.38    5.70
   6  -1   2  239.38    5.50
   6  -1   2  241.48    5.20
   6  -1   2  231.28    5.50
  -7   1  -2    3.20    0.50
   7  -1   2    2.70    0.60
   7  -1   2    3.40    0.40
   7  -1   2    3.50    0.60
   7  -1   2    3.80    0.60
  -8   1  -2   -0.50    0.30
   8  -1   2    0.20    0.50
   8  -1   2    0.00    0.40
   8  -1   2   -0.20    0.30
  -9   1  -2   19.40    1.00
   9  -1   2   19.50    1.40
   9  -1   2   21.50    1.50
   9  -1   2   18.20    1.20
   9  -1   2   20.30    0.90
  10  -1   2   44.80    1.90
  10  -1   2   47.90    2.20
  11  -1   2    2.60    0.80
  11  -1   2    2.90    0.70
  12  -1   2    6.10    0.90
  12  -1   2    6.30    1.10
  12   0  -2    1.80    1.10
  12   0  -2    4.90    0.80
  12   0  -2    2.20    0.50
  11   0  -2   28.20    1.50
  11   0  -2   27.30    1.70
  11   0  -2   23.60    1.40
  11   0  -2   23.90    1.40
  10   0  -2    4.30    0.70
  10   0  -2    2.80    0.80
  10   0  -2    6.00    0.80
   9   0  -2    2.80    0.60
   9   0  -2    2.10    0.70
   9   0  -2    2.00    0.60
   8   0  -2   47.40    1.90
   8   0  -2   45.70    1.70
   8   0  -2   45.20    1.80
   7   0  -2  197.48    4.70
   7   0  -2  196.88    4.90
   6   0  -2   79.49    2.20
   6   0  -2   79.89    2.30
   6   0  -2   81.69    2.30
  -6   0   2   81.19    2.40
   5   0  -2   58.79    1.80
   5   0  -2   61.39    1.70
   5   0  -2   59.29    1.80
  -5   0   2   61.49    1.90
   4   0  -2  347.47    7.60
   4   0  -2  353.86    7.50
   4   0  -2  344.77    7.50
  -4   0   2  356.96    7.70
   3   0  -2  502.35   10.60
   3   0  -2  508.95   10.80
   3   0  -2  513.25   10.70
  -3   0   2  514.35   10.40
  -3   0   2  517.65   10.40
  -3   0   2  519.85   10.80
   2   0  -2    2.30    0.30
   2   0  -2    2.50    0.30
   2   0  -2    2.00    0.20
  -2   0   2    2.60    0.30
  -2   0   2    2.60    0.30
  -2   0   2    2.80    0.30
   0   0   2 2071.99   89.89
   1   0   2  959.30   59.79
  -2   0  -2   56.19    1.20
  -2   0  -2   53.69    1.50
  -2   0  -2   56.09    1.40
  -2   0  -2   54.69    1.40
  -2   0  -2   57.59    1.40
   2   0   2   53.89    1.40
   2   0   2   52.79    1.50
   2   0   2   53.79    1.40
   2   0   2   54.39    1.40
  -3   0  -2  754.62   15.10
   3   0   2  734.73   15.20
   3   0   2  728.73   15.30
  -4   0  -2   32.20    1.10
  -4   0  -2   33.70    0.90
   4   0   2   32.50    1.10
   4   0   2   32.40    1.10
   4   0   2   32.00    1.00
  -5   0  -2  555.84   11.60
  -5   0  -2  553.64   11.10
  -5   0  -2  546.35   11.10
   5   0   2  547.35   11.50
   5   0   2  547.45   11.50
   5   0   2  538.45   11.40
   5   0   2  526.75   11.50
  -6   0  -2    1.30    0.40
   6   0   2    1.20    0.40
   6   0   2    1.50    0.40
   6   0   2    0.90    0.30
   6   0   2    1.50    0.40
  -7   0  -2   88.49    2.50
   7   0   2   86.09    2.40
   7   0   2   86.99    2.50
   7   0   2   85.79    2.40
   7   0   2   86.89    2.60
  -8   0  -2   16.90    1.00
   8   0   2   18.10    1.20
   8   0   2   17.10    1.00
   8   0   2   17.90    1.00
   8   0   2   16.30    0.90
   9   0   2   21.20    1.10
   9   0   2   19.90    1.10
   9   0   2   19.70    1.30
   9   0   2   17.90    1.30
  10   0   2   20.00    1.40
  10   0   2   20.10    1.10
  10   0   2   18.30    1.20
  10   0   2   20.00    1.10
  11   0   2    1.60    0.50
  11   0   2    1.20    0.50
  11   0   2   -0.10    0.60
  11   0   2    2.00    0.50
  12   0   2   24.00    1.50
  12   0   2   22.50    1.60
  13   0   2    3.40    0.80
  11  -1  -2    2.20    0.60
  11  -1  -2    5.20    0.80
  10  -1  -2    1.80    0.60
  10  -1  -2    1.40    0.60
  10  -1  -2    3.20    0.80
   9  -1  -2   34.60    1.60
   9  -1  -2   35.60    1.80
   9  -1  -2   35.10    1.70
   8  -1  -2   31.00    1.50
   8  -1  -2   29.40    1.60
   8  -1  -2   28.90    1.40
   7  -1  -2   93.59    2.80
   7  -1  -2   91.19    2.70
   7  -1  -2   91.99    2.90
   6  -1  -2   91.79    2.60
   6  -1  -2   92.89    2.70
   6  -1  -2   89.19    2.70
  -6   1   2   93.29    2.50
   5  -1  -2  151.38    3.70
   5  -1  -2  149.29    3.80
   5  -1  -2  153.48    3.80
  -5   1   2  149.39    3.30
  -5   1   2  154.58    3.60
   4  -1  -2  121.39    3.10
   4  -1  -2  119.79    3.00
   4  -1  -2  122.59    3.20
  -4   1   2  124.69    2.90
  -4   1   2  125.69    3.00
  -4   1   2  126.49    2.90
   3  -1  -2   26.80    1.10
   3  -1  -2   26.50    1.10
   3  -1  -2   25.60    1.00
  -3   1   2   26.00    1.00
  -3   1   2   26.40    0.90
  -3   1   2   26.90    0.90
   2  -1  -2 1018.70   81.09
   2  -1  -2  943.81   77.39
   0  -1  -2   22.90    0.70
   0  -1  -2   23.30    0.80
   0   1   2   21.60    0.80
   0   1   2   23.00    0.80
   0   1   2   24.20    0.70
  -1  -1  -2  161.28    3.50
  -1  -1  -2  165.18    3.60
  -1  -1  -2  162.28    3.30
  -1  -1  -2  163.58    3.50
   1   1   2  156.58    3.50
   1   1   2  154.88    3.50
   1   1   2  158.58    3.50
   1   1   2  158.68    3.50
  -2  -1  -2    4.60    0.50
  -2  -1  -2    4.70    0.40
  -2  -1  -2    4.70    0.40
   2   1   2    4.00    0.20
   2   1   2    5.00    0.40
   2   1   2    4.50    0.40
   2   1   2    4.10    0.40
  -3  -1  -2  965.60   64.69
   3   1   2  903.71   59.49
  -4  -1  -2   85.59    2.30
   4   1   2   84.19    2.30
   4   1   2   82.49    2.00
   4   1   2   86.19    1.90
   4   1   2   84.79    2.00
  -5  -1  -2  468.15    9.80
   5   1   2  454.25    9.40
   5   1   2  432.96    9.50
   5   1   2  453.85    9.70
   5   1   2  464.45    9.30
   5   1   2  439.76    9.70
  -6  -1  -2   68.99    2.10
   6   1   2   70.79    1.70
   6   1   2   71.69    1.90
   6   1   2   69.89    1.90
   6   1   2   71.49    2.10
   6   1   2   67.09    2.10
  -7  -1  -2    1.60    0.40
   7   1   2    2.10    0.40
   7   1   2    2.20    0.30
   7   1   2    1.40    0.40
   7   1   2    1.40    0.40
   7   1   2    2.10    0.40
  -8  -1  -2   38.00    1.50
   8   1   2   34.10    1.30
   8   1   2   36.40    1.10
   8   1   2   37.30    1.70
   8   1   2   34.90    1.50
   8   1   2   34.70    1.50
   8   1   2   35.70    1.00
   9   1   2    0.20    0.40
   9   1   2   -0.70    0.30
   9   1   2   -0.10    0.40
   9   1   2    0.00    0.50
  10   1   2    4.00    0.70
  10   1   2    4.70    0.70
  10   1   2    4.20    0.70
  10   1   2    3.60    0.70
  11   1   2    2.60    0.70
  11   1   2    3.30    0.60
  11   1   2    3.10    0.70
  11   1   2    3.30    0.60
  12   1   2    1.60    0.50
  12   1   2    0.30    0.50
  12   1   2    1.10    0.60
  12   1   2    0.50    0.50
  13   1   2   44.70    2.10
  11  -2  -2   90.99    2.80
  11  -2  -2  101.29    3.70
  10  -2  -2   29.80    1.50
  10  -2  -2   30.10    2.50
  10  -2  -2   30.60    1.70
   9  -2  -2   42.90    1.80
   9  -2  -2   47.00    2.20
   9  -2  -2   46.30    2.10
   8  -2  -2  109.09    3.50
   8  -2  -2  109.19    3.20
   8  -2  -2  105.09    3.30
   7  -2  -2  147.59    4.10
   7  -2  -2  151.68    4.20
   7  -2  -2  151.38    4.00
   6  -2  -2  491.55   11.00
   6  -2  -2  492.35   10.90
   6  -2  -2  501.65   10.90
  -6   2   2  493.95   10.30
  -6   2   2  483.55   10.40
   5  -2  -2    0.40    0.40
   5  -2  -2    0.90    0.40
   5  -2  -2    1.70    0.50
  -5   2   2    0.90    0.30
  -5   2   2    0.70    0.30
  -5   2   2    1.30    0.40
   4  -2  -2   41.00    1.50
   4  -2  -2   40.50    1.60
   4  -2  -2   42.40    1.50
  -4   2   2   43.40    1.50
  -4   2   2   41.50    1.20
  -4   2   2   44.90    1.40
   3  -2  -2 1031.30   21.80
   3  -2  -2 1010.20   21.70
   3  -2  -2 1044.50   21.80
  -3   2   2 1080.59   21.40
  -3   2   2 1087.29   21.70
   2  -2  -2  153.38    3.80
   2  -2  -2  157.38    3.80
   2  -2  -2  160.88    3.80
  -2   2   2  160.18    3.80
  -2   2   2  163.38    3.80
  -2   2   2  166.38    3.40
  -2   2   2  160.08    3.70
   1  -2  -2   34.40    1.20
   1  -2  -2   33.60    1.20
  -1   2   2   35.60    1.00
  -1   2   2   34.90    1.20
  -1   2   2   34.30    1.10
  -1   2   2   35.60    1.20
   0  -2  -2 1935.41  110.79
  -1  -2  -2  147.49    3.40
  -1  -2  -2  151.48    3.50
  -1  -2  -2  152.88    3.40
   1   2   2  157.68    3.50
   1   2   2  146.79    3.40
   1   2   2  150.28    3.40
   1   2   2  151.18    3.50
  -2  -2  -2  895.71   61.49
  -3  -2  -2    0.90    0.30
  -3  -2  -2    0.70    0.20
   3   2   2    1.00    0.20
   3   2   2    1.20    0.20
   3   2   2    0.80    0.20
   3   2   2    1.20    0.40
  -4  -2  -2   22.60    1.00
  -4  -2  -2   22.80    0.80
   4   2   2   22.00    0.80
   4   2   2   21.40    0.70
   4   2   2   21.80    1.00
  -5  -2  -2  686.03   14.40
   5   2   2  671.93   14.40
   5   2   2  680.03   14.10
   5   2   2  699.83   13.90
   5   2   2  665.33   14.40
   5   2   2  676.93   13.90
  -6  -2  -2   14.50    0.90
   6   2   2   15.10    0.90
   6   2   2   14.80    0.60
   6   2   2   15.00    0.60
   6   2   2   15.40    0.70
   6   2   2   14.60    0.90
   7   2   2    5.80    0.70
   7   2   2    5.50    0.50
   7   2   2    5.90    0.50
   7   2   2    6.30    0.50
   8   2   2    1.90    0.40
   8   2   2    1.90    0.40
   8   2   2    2.20    0.60
   8   2   2    1.50    0.40
   8   2   2    1.60    0.50
   9   2   2   34.60    1.60
   9   2   2   32.10    1.40
   9   2   2   33.20    1.20
   9   2   2   34.90    1.20
   9   2   2   34.90    1.50
  10   2   2   16.60    1.10
  10   2   2   16.70    0.90
  10   2   2   17.90    0.70
  10   2   2   14.70    1.10
  11   2   2    8.00    0.90
  11   2   2    9.10    1.00
  11   2   2   10.00    0.90
  11   2   2    8.50    0.90
  12   2   2    0.60    0.60
  12   2   2    1.10    0.50
  12   2   2    0.70    0.50
  12   2   2    0.80    0.50
  13   2   2    1.80    0.60
  13   2   2    3.20    0.60
  13   2   2    0.50    0.60
  13   2   2    2.70    0.70
  11  -3  -2   33.20    2.20
  10  -3  -2   48.40    2.00
  10  -3  -2   55.89    2.70
   9  -3  -2    0.70    0.50
   9  -3  -2    1.90    1.00
   9  -3  -2    1.20    0.60
   8  -3  -2   26.90    1.60
   8  -3  -2   23.40    1.30
   8  -3  -2   24.40    1.70
   7  -3  -2    5.30    0.90
   7  -3  -2    5.40    1.00
   7  -3  -2    6.20    0.80
  -7   3   2    5.10    0.60
  -7   3   2    5.50    0.60
   6  -3  -2   11.60    1.00
   6  -3  -2    7.70    1.00
   6  -3  -2    8.70    0.90
  -6   3   2    8.80    0.80
  -6   3   2    7.70    0.80
   5  -3  -2   86.59    2.60
   5  -3  -2   79.89    2.70
  -5   3   2   80.99    2.50
  -5   3   2   83.59    3.10
   4  -3  -2   19.10    1.10
   4  -3  -2   19.90    1.20
   4  -3  -2   18.60    1.10
  -4   3   2   19.60    1.10
   3  -3  -2   82.19    2.50
   3  -3  -2   81.49    2.60
   3  -3  -2   88.59    2.50
  -3   3   2   87.39    2.50
  -3   3   2   90.99    2.10
  -3   3   2   87.79    2.10
  -3   3   2   93.79    2.50
  -3   3   2   90.49    2.60
   2  -3  -2    0.10    0.30
   2  -3  -2    0.10    0.40
   2  -3  -2    0.20    0.30
  -2   3   2   -0.10    0.40
  -2   3   2    0.20    0.30
  -2   3   2    0.10    0.30
   1  -3  -2  569.94   12.20
   1  -3  -2  581.14   12.20
   1  -3  -2  556.24   12.20
  -1   3   2  579.84   12.20
  -1   3   2  579.14   12.10
  -1   3   2  585.44   12.20
  -1  -3  -2  235.58    5.10
  -1  -3  -2  229.28    5.10
   1   3   2  231.18    5.10
   1   3   2  229.08    5.10
  -2  -3  -2  244.98    5.40
  -2  -3  -2  236.48    5.20
  -2  -3  -2  242.68    5.00
  -2  -3  -2  242.78    5.20
   2   3   2  239.38    5.20
   2   3   2  234.28    5.20
   2   3   2  241.38    5.40
   2   3   2  241.88    5.40
  -3  -3  -2  112.39    2.40
  -3  -3  -2  111.89    2.40
  -3  -3  -2  114.99    2.80
  -3  -3  -2  108.99    2.40
   3   3   2  110.69    2.50
   3   3   2  110.29    2.40
   3   3   2  113.49    2.60
   3   3   2  110.49    2.80
   3   3   2  107.59    2.90
   4   3   2  621.04   12.70
   4   3   2  624.14   13.20
   4   3   2  624.04   13.10
   4   3   2  616.04   12.70
   4   3   2  623.94   12.70
   5   3   2  194.28    5.00
   5   3   2  208.68    4.30
   5   3   2  196.18    4.90
   5   3   2  214.08    4.60
   5   3   2  201.68    4.70
   5   3   2  209.68    4.50
   6   3   2   18.30    0.60
   6   3   2   17.50    0.90
   6   3   2   19.00    0.60
   6   3   2   16.20    1.00
   7   3   2   23.50    0.70
   7   3   2   23.50    1.00
   7   3   2   21.00    1.20
   7   3   2   21.90    0.80
   7   3   2   22.50    1.30
   8   3   2    0.00    0.40
   8   3   2    0.50    0.30
   8   3   2    0.40    0.20
   8   3   2    0.20    0.30
   8   3   2   -0.10    0.40
   9   3   2   80.69    2.30
   9   3   2   82.89    2.80
   9   3   2   79.79    2.60
   9   3   2   81.49    2.10
   9   3   2   78.89    2.20
  10   3   2   12.90    1.20
  10   3   2   12.90    0.90
  10   3   2   13.30    0.80
  10   3   2   13.20    1.10
  10   3   2   11.40    0.70
  11   3   2    7.90    0.70
  11   3   2    8.70    0.70
  11   3   2    8.40    0.90
  11   3   2    9.40    1.00
  11   3   2    9.30    1.10
  12   3   2   16.50    1.10
  12   3   2   16.10    1.20
  12   3   2   14.80    1.10
  12   3   2   15.30    1.30
  13   3   2   22.80    1.60
  13   3   2   23.60    1.50
  13   3   2   26.80    1.50
  13   3   2   24.60    1.40
  13   3   2   23.90    1.20
  10  -4  -2    0.50    0.50
  10  -4  -2    0.70    0.80
   9  -4  -2  100.69    3.80
   9  -4  -2   99.89    3.10
   8  -4  -2   29.80    1.80
   8  -4  -2   28.50    1.60
  -8   4   2   30.40    1.20
  -8   4   2   29.10    1.10
   7  -4  -2   52.59    2.40
   7  -4  -2   52.19    2.00
   7  -4  -2   48.90    2.20
  -7   4   2   50.69    1.80
  -7   4   2   49.40    1.80
   6  -4  -2   -0.10    0.60
   6  -4  -2   -0.20    0.40
   6  -4  -2    0.00    0.50
  -6   4   2    0.30    0.50
  -6   4   2    1.30    0.50
   5  -4  -2   28.00    1.70
   5  -4  -2   28.30    1.50
   5  -4  -2   28.70    1.40
  -5   4   2   27.10    1.30
  -5   4   2   26.90    1.40
   4  -4  -2   91.39    2.70
   4  -4  -2   81.49    2.80
   4  -4  -2   88.09    2.70
  -4   4   2   87.29    2.70
  -4   4   2   86.89    2.60
  -4   4   2   85.59    2.10
   3  -4  -2    5.00    0.70
   3  -4  -2    5.10    0.80
   3  -4  -2    5.40    0.70
  -3   4   2    7.00    0.80
  -3   4   2    6.20    0.70
  -3   4   2    5.00    0.60
   2  -4  -2    7.70    0.80
   2  -4  -2    8.40    0.80
   2  -4  -2    5.90    0.70
  -2   4   2    8.10    0.80
  -2   4   2    6.90    0.70
  -2   4   2    7.60    0.80
   1  -4  -2   12.40    0.80
   1  -4  -2   13.10    0.90
  -1   4   2   12.90    0.90
  -1   4   2   14.00    0.90
  -1   4   2   12.60    1.00
   0  -4  -2  402.86    8.90
   0  -4  -2  411.46    8.90
   0  -4  -2  396.46    9.00
   0   4   2  418.26    9.00
   0   4   2  399.66    8.90
   0   4   2  418.96    9.00
  -1  -4  -2   87.89    2.50
  -1  -4  -2   90.89    2.20
  -1  -4  -2   88.79    2.40
  -1  -4  -2   92.99    2.40
   1   4   2   86.29    2.40
  -2  -4  -2   64.29    1.70
  -2  -4  -2   63.19    2.00
  -2  -4  -2   63.69    1.60
  -2  -4  -2   62.19    1.70
   2   4   2   61.29    1.70
   2   4   2   61.59    1.80
   2   4   2   59.89    1.90
   3   4   2  820.12   16.90
  -4  -4  -2  529.95   11.20
   4   4   2  521.55   11.30
   4   4   2  517.75   10.70
   4   4   2  511.65   11.10
   4   4   2  511.65   10.60
   4   4   2  507.25   10.70
  -5  -4  -2    8.70    0.70
   5   4   2   10.50    0.50
   5   4   2    9.90    0.50
   5   4   2   10.80    0.90
   5   4   2    9.50    0.80
   5   4   2   10.90    0.50
   5   4   2    9.50    0.70
   6   4   2    2.70    0.30
   6   4   2    3.00    0.30
   6   4   2    3.40    0.50
   6   4   2    3.90    0.40
   6   4   2    5.10    0.80
   6   4   2    3.00    0.60
   7   4   2   59.59    1.80
   7   4   2   62.09    2.00
   7   4   2   58.69    2.10
   7   4   2   58.59    1.40
   7   4   2   58.89    2.20
   8   4   2  477.05   10.80
   8   4   2  483.55   10.50
   8   4   2  468.65   11.00
   8   4   2  470.35    9.90
   8   4   2  483.85    9.90
   9   4   2  122.79    2.90
   9   4   2  127.79    3.40
   9   4   2  124.29    3.70
   9   4   2  121.39    3.80
   9   4   2  121.29    2.90
  10   4   2   37.90    1.80
  10   4   2   38.30    1.30
  10   4   2   40.10    2.00
  10   4   2   41.80    1.80
  10   4   2   41.00    1.70
  10   4   2   39.60    1.20
  11   4   2    0.40    0.60
  11   4   2    0.50    0.40
  11   4   2    0.20    0.30
  11   4   2   -0.30    0.50
  11   4   2    0.40    0.40
  11   4   2    0.10    0.50
  12   4   2   22.50    1.20
  12   4   2   20.80    1.00
  12   4   2   19.60    1.40
  12   4   2   23.50    1.50
  12   4   2   21.20    1.60
  12   4   2   22.00    1.00
  13   4   2    2.80    0.50
  13   4   2    3.10    0.80
  13   4   2    3.10    0.80
  13   4   2    2.00    0.60
  13   4   2    3.00    0.70
  10  -5  -2    3.30    1.10
   9  -5  -2    1.80    0.60
   9  -5  -2    0.70    0.90
   8  -5  -2   -0.70    0.40
   8  -5  -2   -1.10    0.70
  -8   5   2    0.10    0.40
  -8   5   2    0.30    0.50
   7  -5  -2   14.30    1.30
   7  -5  -2   14.60    1.20
  -7   5   2   14.90    1.10
   6  -5  -2    2.80    0.60
   6  -5  -2    2.60    0.70
   6  -5  -2    1.90    0.80
  -6   5   2    2.90    0.70
  -6   5   2    3.00    0.70
   5  -5  -2  253.77    6.60
   5  -5  -2  255.97    6.30
   5  -5  -2  248.28    6.40
  -5   5   2  246.88    6.30
  -5   5   2  252.37    5.40
  -5   5   2  241.18    6.10
   4  -5  -2   46.80    2.00
   4  -5  -2   44.70    2.10
   4  -5  -2   49.00    2.00
  -4   5   2   48.10    1.50
  -4   5   2   46.70    1.90
  -4   5   2   48.00    1.90
  -4   5   2   47.60    2.80
   3  -5  -2    9.80    0.90
   3  -5  -2    7.40    0.90
   3  -5  -2    8.90    0.90
  -3   5   2    9.00    0.90
  -3   5   2    9.70    0.90
  -3   5   2    9.50    1.00
   2  -5  -2   76.19    2.60
   2  -5  -2   75.69    2.50
   2  -5  -2   76.29    2.50
  -2   5   2   80.99    2.50
  -2   5   2   77.59    2.50
  -2   5   2   82.19    2.60
   1  -5  -2  872.21   18.30
   1  -5  -2  852.11   18.10
   1  -5  -2  799.32   18.20
  -1   5   2  885.31   18.20
  -1   5   2  858.31   18.10
  -1   5   2  880.41   18.30
   0  -5  -2  859.01   17.90
   0  -5  -2  804.12   18.00
   0  -5  -2  875.51   17.90
   0  -5  -2  872.41   17.80
   0   5   2  850.61   17.90
   0   5   2  834.62   18.00
  -1  -5  -2  328.57    8.00
  -1  -5  -2  370.46    7.90
  -1  -5  -2  358.46    7.80
  -1  -5  -2  364.46    7.70
   1   5   2  338.67    7.90
   1   5   2  359.36    8.00
  -2  -5  -2  189.58    4.30
  -2  -5  -2  190.58    4.40
  -2  -5  -2  185.08    4.70
  -2  -5  -2  190.08    4.20
   2   5   2  186.38    5.00
   2   5   2  177.88    4.40
   2   5   2  180.18    4.40
  -3  -5  -2  282.27    6.00
  -3  -5  -2  280.27    6.00
  -3  -5  -2  282.97    5.90
  -3  -5  -2  279.27    6.50
   3   5   2  282.97    6.90
   3   5   2  275.37    5.90
   3   5   2  265.57    6.20
   3   5   2  267.37    6.10
  -4  -5  -2  332.67    6.80
  -4  -5  -2  330.87    6.80
  -4  -5  -2  330.97    7.60
  -4  -5  -2  342.77    7.00
   4   5   2  333.67    7.70
   4   5   2  321.97    7.20
   4   5   2  329.57    7.00
   4   5   2  326.37    7.70
   4   5   2  325.97    7.10
  -5  -5  -2    9.40    0.80
   5   5   2    9.90    0.60
   5   5   2    9.80    0.80
   5   5   2   10.00    0.50
   5   5   2    9.50    0.90
   5   5   2    9.70    0.90
   5   5   2   10.90    0.60
  -6  -5  -2   75.39    2.50
   6   5   2   69.99    2.50
   6   5   2   73.89    1.90
   6   5   2   76.99    2.60
   6   5   2   73.59    1.90
   6   5   2   76.19    2.40
   6   5   2   76.19    1.90
   7   5   2   26.40    1.00
   7   5   2   26.70    1.30
   7   5   2   27.50    1.50
   7   5   2   26.20    0.80
   7   5   2   26.10    1.50
   7   5   2   27.40    0.90
   8   5   2  114.39    3.30
   8   5   2  106.89    2.50
   8   5   2  106.09    3.40
   8   5   2  109.09    3.60
   8   5   2  110.79    2.90
   8   5   2  109.29    2.50
   9   5   2    7.40    0.40
   9   5   2    6.70    0.70
   9   5   2    8.20    1.00
   9   5   2    7.10    0.80
   9   5   2    7.00    1.00
   9   5   2    7.90    0.50
  10   5   2    0.40    0.40
  10   5   2    0.50    0.30
  10   5   2    0.60    0.50
  10   5   2    0.10    0.60
  10   5   2    0.90    0.30
  10   5   2    0.10    0.40
  11   5   2    0.90    0.40
  11   5   2    0.90    0.50
  11   5   2    0.80    0.50
  11   5   2    1.20    0.60
  11   5   2    1.00    0.30
  11   5   2   -0.40    0.50
  12   5   2   51.69    2.10
  12   5   2   53.29    2.50
  12   5   2   53.09    2.00
  12   5   2   53.89    2.30
  12   5   2   52.29    1.70
  12   5   2   52.59    1.60
  13   5   2    1.20    0.60
  13   5   2    0.60    0.50
  13   5   2    0.40    0.40
  13   5   2    1.10    0.50
  13   5   2    1.10    0.40
   9  -6  -2   13.00    1.80
   9  -6  -2   13.00    1.20
  -9   6   2   13.30    0.90
   8  -6  -2   20.30    1.90
   8  -6  -2   14.40    1.30
  -8   6   2   21.90    1.30
  -8   6   2   18.40    1.30
   7  -6  -2   36.60    1.90
   7  -6  -2   39.20    2.40
  -7   6   2   34.90    1.80
  -7   6   2   36.30    1.80
   6  -6  -2  138.09    4.50
   6  -6  -2  134.69    4.10
   6  -6  -2  136.99    4.30
  -6   6   2  136.99    4.00
  -6   6   2  137.09    4.20
   5  -6  -2    2.40    0.90
   5  -6  -2    3.80    0.70
   5  -6  -2    3.80    0.80
  -5   6   2    5.50    0.90
  -5   6   2    4.30    0.50
  -5   6   2    3.70    0.90
   4  -6  -2   53.19    2.40
   4  -6  -2   53.09    2.10
   4  -6  -2   50.59    2.20
  -4   6   2   49.99    1.70
  -4   6   2   47.80    2.20
  -4   6   2   48.10    2.10
  -4   6   2   50.59    2.10
   3  -6  -2   88.79    3.00
   3  -6  -2   90.39    3.10
   3  -6  -2   95.19    3.10
  -3   6   2   89.69    2.90
  -3   6   2   84.89    3.00
  -3   6   2   87.89    2.90
   2  -6  -2   55.69    2.20
   2  -6  -2   54.19    2.10
   2  -6  -2   55.89    2.10
   2  -6  -2   52.79    2.10
  -2   6   2   50.49    2.20
  -2   6   2   56.59    2.20
  -2   6   2   54.79    1.60
  -2   6   2   54.99    2.10
   1  -6  -2    0.00    0.40
   1  -6  -2    0.30    0.30
   1  -6  -2    0.10    0.50
   1  -6  -2    0.20    0.40
  -1   6   2   -0.10    0.40
  -1   6   2    0.90    0.50
   0  -6  -2    9.80    0.90
   0  -6  -2    9.80    0.80
   0  -6  -2    8.70    0.80
   0  -6  -2    9.00    0.90
   0   6   2    9.30    0.90
   0   6   2    9.70    0.90
   0   6   2    9.90    0.90
  -1  -6  -2   44.20    1.70
  -1  -6  -2   42.10    1.80
  -1  -6  -2   43.60    1.50
  -1  -6  -2   43.70    1.60
   1   6   2   44.80    1.80
   1   6   2   42.00    1.70
   1   6   2   40.70    1.60
  -2  -6  -2  234.98    6.30
  -2  -6  -2  241.08    5.30
  -2  -6  -2  240.78    5.90
  -2  -6  -2  236.98    5.50
   2   6   2  238.08    5.80
   2   6   2  222.88    5.60
   2   6   2  229.38    5.50
  -3  -6  -2   78.59    2.10
  -3  -6  -2   76.89    2.00
  -3  -6  -2   77.69    2.10
  -3  -6  -2   76.39    2.50
   3   6   2   71.39    2.50
   3   6   2   75.99    2.00
   3   6   2   75.99    2.20
   3   6   2   73.79    2.30
   3   6   2   78.19    2.50
  -4  -6  -2   55.49    2.10
  -4  -6  -2   54.89    1.50
  -4  -6  -2   52.09    1.40
  -4  -6  -2   54.49    1.50
   4   6   2   52.49    1.70
   4   6   2   53.99    1.50
   4   6   2   52.59    2.00
   4   6   2   54.99    2.10
   4   6   2   52.69    1.70
  -5  -6  -2   16.40    1.10
  -5  -6  -2   14.40    0.70
   5   6   2   15.20    0.70
   5   6   2   12.10    1.20
   5   6   2   15.10    0.80
   5   6   2   14.00    1.10
   5   6   2   13.00    1.10
   5   6   2   14.70    0.80
  -6  -6  -2   11.50    1.00
   6   6   2   12.60    1.10
   6   6   2   11.60    0.70
   6   6   2   10.70    1.00
   6   6   2   12.80    0.70
   6   6   2   11.00    1.00
   6   6   2   10.90    0.60
   7   6   2  575.84   12.10
   7   6   2  583.94   13.20
   7   6   2  583.04   12.30
   7   6   2  582.64   13.30
   7   6   2  581.44   12.20
   7   6   2  593.64   13.00
   8   6   2   67.49    2.60
   8   6   2   68.49    2.50
   8   6   2   71.79    2.80
   8   6   2   70.49    1.80
   8   6   2   71.29    2.10
   8   6   2   68.69    1.80
   9   6   2   17.10    1.30
   9   6   2   15.60    0.90
   9   6   2   16.50    0.70
   9   6   2   16.50    1.40
   9   6   2   16.00    0.70
   9   6   2   15.70    1.20
  10   6   2   19.30    0.80
  10   6   2   18.70    1.10
  10   6   2   18.60    1.50
  10   6   2   20.20    1.50
  10   6   2   19.10    0.70
  10   6   2   19.90    1.30
  11   6   2   19.80    0.80
  11   6   2   20.80    1.20
  11   6   2   19.10    0.70
  11   6   2   20.30    1.60
  11   6   2   22.70    1.40
  11   6   2   19.50    1.50
  12   6   2    5.00    0.80
  12   6   2    5.60    0.80
  12   6   2    4.10    0.90
  13   6   2    1.20    0.50
  13   6   2    1.20    0.60
  13   6   2    1.80    0.30
  13   6   2    1.40    0.50
   8  -7  -2    3.90    0.80
   8  -7  -2    4.10    1.20
  -8   7   2    6.30    0.90
  -8   7   2    6.00    0.90
   7  -7  -2    1.40    1.00
   7  -7  -2    1.20    0.50
  -7   7   2    2.70    0.70
  -7   7   2    1.60    0.70
   6  -7  -2    4.00    0.80
   6  -7  -2    2.90    1.00
  -6   7   2    3.20    0.40
  -6   7   2    4.10    0.50
  -6   7   2    2.90    0.80
  -6   7   2    3.50    0.90
   5  -7  -2    0.00    0.50
   5  -7  -2   -0.10    0.70
   5  -7  -2    0.50    0.60
   5  -7  -2   -0.30    0.20
  -5   7   2    0.00    0.50
  -5   7   2    0.30    0.30
  -5   7   2   -0.40    0.50
  -5   7   2   -0.20    0.50
   4  -7  -2   46.80    2.40
   4  -7  -2   43.50    2.10
   4  -7  -2   47.50    2.20
  -4   7   2   46.20    2.10
  -4   7   2   46.10    2.10
  -4   7   2   45.90    1.70
  -4   7   2   44.70    2.20
   3  -7  -2    1.20    0.50
   3  -7  -2    1.80    0.60
   3  -7  -2    1.10    0.70
   3  -7  -2    0.90    0.50
  -3   7   2    2.40    0.70
  -3   7   2    1.60    0.70
  -3   7   2    1.30    0.70
   2  -7  -2    0.80    0.50
   2  -7  -2    1.30    0.60
   2  -7  -2    0.40    0.50
   2  -7  -2    0.60    0.50
  -2   7   2    0.60    0.60
  -2   7   2    0.60    0.60
  -2   7   2    1.40    0.40
  -2   7   2    1.00    0.60
   1  -7  -2   51.39    2.10
   1  -7  -2   53.19    2.20
   1  -7  -2   52.59    2.00
   1  -7  -2   52.09    2.20
  -1   7   2   53.19    1.70
  -1   7   2   51.19    2.10
  -1   7   2   52.09    2.10
  -1   7   2   50.69    2.20
   0  -7  -2    6.10    0.90
   0  -7  -2    6.20    0.80
   0  -7  -2    6.20    0.80
   0  -7  -2    4.40    0.60
   0   7   2    6.20    0.70
   0   7   2    6.60    0.90
   0   7   2    4.50    0.70
   0   7   2    5.00    0.70
  -1  -7  -2    3.50    0.70
  -1  -7  -2    3.20    0.70
  -1  -7  -2    3.60    0.60
  -1  -7  -2    3.40    0.50
   1   7   2    2.40    0.60
   1   7   2    2.60    0.50
   1   7   2    3.30    0.70
   1   7   2    4.40    0.70
  -2  -7  -2   14.30    0.90
  -2  -7  -2   14.80    0.80
  -2  -7  -2   16.90    1.00
   2   7   2   11.80    1.00
   2   7   2   15.40    1.10
   2   7   2   13.90    1.00
   2   7   2   13.70    1.10
  -3  -7  -2  152.18    3.80
  -3  -7  -2  153.68    3.70
   3   7   2  148.69    3.90
   3   7   2  154.58    4.20
   3   7   2  153.78    4.00
   3   7   2  147.29    4.30
  -4  -7  -2    1.20    0.30
  -4  -7  -2    1.50    0.60
  -4  -7  -2    1.60    0.30
  -4  -7  -2    1.30    0.30
   4   7   2    1.00    0.30
   4   7   2    0.60    0.40
   4   7   2    1.50    0.40
   4   7   2    1.40    0.50
   4   7   2    0.70    0.50
  -5  -7  -2   73.49    2.00
  -5  -7  -2   73.59    2.70
   5   7   2   70.49    2.60
   5   7   2   70.19    2.60
   5   7   2   73.99    2.20
   5   7   2   75.29    2.00
   5   7   2   71.49    2.20
  -6  -7  -2   75.09    2.80
   6   7   2   75.09    2.80
   6   7   2   77.29    2.00
   6   7   2   73.69    2.20
   6   7   2   76.89    2.70
   6   7   2   76.19    2.20
   7   7   2  108.89    2.80
   7   7   2  109.99    3.50
   7   7   2  114.29    3.70
   7   7   2  110.39    2.80
   7   7   2  111.79    2.80
   7   7   2  102.99    3.50
   8   7   2   52.59    1.60
   8   7   2   52.09    2.40
   8   7   2   56.89    2.30
   8   7   2   53.79    1.70
   8   7   2   52.99    2.40
   8   7   2   52.69    1.60
   9   7   2    4.60    0.80
   9   7   2    4.10    0.50
   9   7   2    4.30    0.90
   9   7   2    4.00    0.80
   9   7   2    4.00    0.50
  10   7   2    4.80    0.60
  10   7   2    4.80    0.50
  10   7   2    5.70    0.90
  10   7   2    5.00    0.50
  10   7   2    4.70    1.00
  10   7   2    4.10    0.90
  11   7   2   48.60    1.40
  11   7   2   48.80    2.60
  11   7   2   48.60    1.80
  11   7   2   51.99    2.20
  11   7   2   47.50    1.40
  11   7   2   53.09    2.50
  12   7   2   -0.60    0.50
  12   7   2    0.20    0.50
  12   7   2    0.00    0.30
  13   7   2    9.80    0.90
  13   7   2   11.10    1.30
  13   7   2    9.00    1.10
   8  -8  -2   10.80    1.70
  -8   8   2   15.90    1.50
  -8   8   2    9.60    1.10
   7  -8  -2   21.50    2.10
   7  -8  -2   19.60    1.50
  -7   8   2   21.90    1.60
  -7   8   2   21.90    1.60
   6  -8  -2   12.00    1.70
   6  -8  -2   10.20    1.20
  -6   8   2   10.30    0.70
  -6   8   2   10.40    1.30
  -6   8   2   12.00    1.40
  -6   8   2   10.70    0.70
   5  -8  -2   39.20    2.40
   5  -8  -2   39.10    2.10
  -5   8   2   39.30    2.10
  -5   8   2   35.80    1.50
  -5   8   2   43.00    2.10
   4  -8  -2    4.40    1.10
   4  -8  -2    4.30    0.90
   4  -8  -2    6.30    1.10
   4  -8  -2    6.10    1.00
  -4   8   2    5.30    0.70
  -4   8   2    4.10    0.90
  -4   8   2    5.20    1.00
   3  -8  -2   47.50    2.30
   3  -8  -2   50.59    2.50
  -3   8   2   51.99    2.40
  -3   8   2   49.70    2.30
  -3   8   2   49.30    2.40
   2  -8  -2   20.70    1.50
   2  -8  -2   25.10    1.50
   2  -8  -2   22.10    1.60
  -2   8   2   21.30    1.50
  -2   8   2   22.10    1.60
  -2   8   2   25.60    1.70
  -2   8   2   23.10    1.00
   1  -8  -2   11.10    1.00
   1  -8  -2   10.10    1.10
   1  -8  -2   11.50    1.20
   1  -8  -2   11.90    1.20
  -1   8   2   11.90    1.30
  -1   8   2   12.20    1.20
  -1   8   2   12.60    1.30
  -1   8   2   11.20    0.80
   0  -8  -2    0.50    0.40
   0  -8  -2    0.70    0.50
   0  -8  -2    1.00    0.60
   0  -8  -2    0.40    0.60
   0   8   2    0.80    0.40
   0   8   2    1.20    0.70
   0   8   2    1.60    0.70
   0   8   2    0.90    0.60
  -1  -8  -2    2.40    0.70
  -1  -8  -2    2.00    0.60
  -1  -8  -2    1.70    0.50
  -1  -8  -2    1.70    0.50
   1   8   2    2.00    0.50
   1   8   2    1.90    0.70
   1   8   2    2.40    0.70
   1   8   2    1.50    0.50
  -2  -8  -2   70.09    2.30
  -2  -8  -2   70.49    2.40
  -2  -8  -2   70.89    2.40
  -2  -8  -2   78.49    2.80
   2   8   2   73.39    2.70
   2   8   2   69.29    2.50
   2   8   2   76.09    2.60
   2   8   2   69.89    2.60
  -3  -8  -2    0.40    0.40
  -3  -8  -2    0.50    0.30
  -3  -8  -2    0.50    0.40
  -3  -8  -2    0.00    0.30
   3   8   2    0.10    0.50
   3   8   2   -0.10    0.40
   3   8   2   -0.40    0.40
   3   8   2    0.30    0.50
  -4  -8  -2  128.59    3.30
  -4  -8  -2  129.69    3.30
  -4  -8  -2  130.49    4.10
  -4  -8  -2  130.69    3.30
   4   8   2  132.99    4.00
   4   8   2  134.59    3.40
   4   8   2  129.29    3.70
   4   8   2  128.49    4.00
   4   8   2  131.79    3.60
  -5  -8  -2    5.70    0.90
  -5  -8  -2    5.10    0.60
  -5  -8  -2    5.70    0.40
  -5  -8  -2    5.00    0.40
   5   8   2    6.50    0.60
   5   8   2    4.20    0.70
   5   8   2    4.30    0.70
   5   8   2    5.20    0.90
   5   8   2    5.90    0.90
  -6  -8  -2    0.50    0.30
  -6  -8  -2   -0.50    0.40
   6   8   2    0.80    0.60
   6   8   2    0.60    0.30
   6   8   2    0.50    0.50
   6   8   2    1.10    0.60
   6   8   2    0.40    0.40
   6   8   2    0.60    0.40
   7   8   2   63.69    2.70
   7   8   2   60.29    2.50
   7   8   2   57.89    2.60
   7   8   2   59.39    1.80
   7   8   2   60.49    2.00
   8   8   2  127.39    4.30
   8   8   2  128.29    3.20
   8   8   2  126.89    4.00
   8   8   2  125.29    3.20
   8   8   2  124.79    4.20
   8   8   2  121.29    3.30
   9   8   2   44.60    1.50
   9   8   2   46.20    2.40
   9   8   2   45.90    1.60
   9   8   2   49.80    2.30
   9   8   2   48.80    2.50
  10   8   2    2.60    0.50
  10   8   2    2.90    0.50
  10   8   2    3.00    0.80
  10   8   2    2.60    0.40
  10   8   2    3.90    1.00
  11   8   2    2.10    0.80
  11   8   2    2.30    0.40
  11   8   2    2.40    0.40
  11   8   2    2.10    0.70
  11   8   2    2.30    0.50
  12   8   2   54.29    1.50
  12   8   2   51.49    1.50
  12   8   2   53.89    2.00
  12   8   2   57.49    2.70
  12   8   2   56.79    2.50
  13   8   2    5.70    0.90
  13   8   2    5.60    1.00
  13   8   2    7.00    0.80
   7  -9  -2    9.80    1.60
   7  -9  -2    7.70    1.20
  -7   9   2   11.60    1.40
   6  -9  -2    3.70    0.90
   6  -9  -2    3.20    1.20
  -6   9   2    3.20    0.60
  -6   9   2    3.30    0.50
  -6   9   2    3.20    0.90
   5  -9  -2    0.30    0.80
  -5   9   2    0.50    0.70
  -5   9   2    0.00    0.60
  -5   9   2    0.50    0.60
   4  -9  -2  144.39    4.70
   4  -9  -2  153.28    5.00
  -4   9   2  142.19    4.60
  -4   9   2  146.69    4.60
  -4   9   2  141.99    4.10
  -4   9   2  145.89    4.80
   3  -9  -2   26.60    1.80
   3  -9  -2   25.20    1.80
   3  -9  -2   28.70    2.00
  -3   9   2   28.70    2.00
  -3   9   2   28.60    1.90
  -3   9   2   29.50    1.90
   2  -9  -2   81.09    3.30
   2  -9  -2   81.59    3.20
  -2   9   2   84.99    3.20
  -2   9   2   82.79    2.40
   1  -9  -2  104.79    3.40
   1  -9  -2   97.09    3.60
   1  -9  -2   98.99    3.50
  -1   9   2   99.29    3.60
  -1   9   2   98.39    2.90
  -1   9   2  105.89    3.50
   0  -9  -2   89.29    3.20
   0  -9  -2   82.29    3.20
   0  -9  -2   82.79    3.00
   0  -9  -2   87.79    2.90
   0   9   2   86.79    3.10
   0   9   2   86.79    3.20
   0   9   2   87.09    2.70
  -1  -9  -2  108.49    3.40
  -1  -9  -2  111.69    3.50
  -1  -9  -2  105.69    3.20
  -1  -9  -2  107.49    3.70
   1   9   2  108.09    3.50
   1   9   2  108.59    3.60
   1   9   2  104.19    3.30
   1   9   2  107.49    3.70
  -2  -9  -2  131.79    3.70
  -2  -9  -2  127.79    3.90
  -2  -9  -2  133.39    4.30
  -2  -9  -2  131.79    3.80
   2   9   2  130.29    3.90
   2   9   2  128.79    4.00
   2   9   2  124.59    4.10
   2   9   2  129.89    3.90
  -3  -9  -2  182.58    4.60
  -3  -9  -2  183.38    4.60
  -3  -9  -2  183.58    5.30
  -3  -9  -2  183.38    4.70
   3   9   2  180.38    4.90
   3   9   2  172.38    5.00
   3   9   2  180.38    5.00
   3   9   2  177.98    5.20
  -4  -9  -2  332.67    8.60
  -4  -9  -2  337.87    7.70
  -4  -9  -2  347.47    7.70
  -4  -9  -2  344.67    7.70
   4   9   2  346.07    8.10
   4   9   2  348.07    8.60
   4   9   2  335.47    8.40
   4   9   2  331.07    8.10
  -5  -9  -2  224.48    5.10
  -5  -9  -2  235.28    5.20
  -5  -9  -2  223.48    6.40
  -5  -9  -2  226.38    5.40
   5   9   2  231.28    6.30
   5   9   2  233.08    6.40
   5   9   2  237.08    5.80
   5   9   2  217.98    5.80
   5   9   2  236.58    5.40
  -6  -9  -2    4.60    0.90
  -6  -9  -2    5.00    0.60
   6   9   2    5.20    0.80
   6   9   2    4.10    0.70
   6   9   2    3.40    0.70
   6   9   2    1.80    0.70
   6   9   2    4.30    0.60
  -7  -9  -2   94.59    3.60
   7   9   2   94.29    2.80
   7   9   2   94.39    3.00
   7   9   2   93.99    3.50
   7   9   2   92.99    2.60
   7   9   2   97.09    3.60
   8   9   2   20.70    1.00
   8   9   2   17.30    1.10
   8   9   2   19.70    1.60
   8   9   2   20.30    1.60
   8   9   2   19.90    1.10
   9   9   2   16.10    1.50
   9   9   2   18.20    1.10
   9   9   2   20.50    1.60
   9   9   2   17.70    1.00
   9   9   2   19.70    1.70
  10   9   2    0.80    0.70
  10   9   2    2.20    0.70
  10   9   2    2.40    0.50
  10   9   2    2.10    0.50
  11   9   2    5.80    0.70
  11   9   2    5.10    1.10
  11   9   2    5.60    0.60
  11   9   2    6.60    0.70
  11   9   2    8.30    1.30
  12   9   2   27.20    1.10
  12   9   2   26.60    1.30
  12   9   2   25.00    1.80
  12   9   2   24.70    1.10
  12   9   2   26.60    2.00
  13   9   2   29.60    2.10
  13   9   2   26.80    1.30
  13   9   2   26.90    1.80
   6 -10  -2   68.69    3.60
  -6  10   2   63.79    2.20
  -6  10   2   67.89    3.00
   5 -10  -2   13.60    1.80
  -5  10   2   11.60    1.00
  -5  10   2   14.10    1.50
  -5  10   2   14.20    1.10
  -5  10   2   15.80    1.60
   4 -10  -2    6.60    1.10
   4 -10  -2    7.40    1.40
  -4  10   2    7.60    1.20
  -4  10   2    9.50    1.30
  -4  10   2    8.20    1.00
   3 -10  -2    9.50    1.50
   3 -10  -2    9.40    1.30
  -3  10   2    9.70    1.40
  -3  10   2    9.40    1.30
  -3  10   2    9.90    1.20
   2 -10  -2   27.10    2.00
   2 -10  -2   23.60    1.60
   2 -10  -2   23.50    2.10
  -2  10   2   23.90    1.10
  -2  10   2   29.80    2.00
  -2  10   2   26.40    2.90
  -2  10   2   24.90    1.80
   1 -10  -2   57.79    2.70
   1 -10  -2   56.09    2.50
   1 -10  -2   54.39    2.70
  -1  10   2   52.59    2.60
  -1  10   2   56.69    2.00
  -1  10   2   55.19    2.60
   0 -10  -2    2.40    0.90
   0 -10  -2    3.10    0.70
   0 -10  -2    3.20    0.80
   0  10   2    2.30    1.30
   0  10   2    3.00    0.80
   0  10   2    2.70    0.80
  -1 -10  -2    0.10    0.40
  -1 -10  -2    0.10    0.50
  -1 -10  -2    1.00    0.70
  -1 -10  -2    1.30    0.60
   1  10   2    0.20    0.60
   1  10   2    0.20    0.50
   1  10   2    1.00    0.70
   1  10   2    0.00    0.50
  -2 -10  -2    0.60    0.50
  -2 -10  -2    0.20    0.60
  -2 -10  -2    0.00    0.40
  -2 -10  -2   -0.30    0.50
   2  10   2    1.00    0.60
   2  10   2    0.50    0.70
   2  10   2    0.60    0.50
   2  10   2    0.10    0.60
  -3 -10  -2   36.50    1.70
  -3 -10  -2   38.80    1.70
  -3 -10  -2   37.80    1.70
   3  10   2   36.60    1.90
   3  10   2   37.20    2.00
   3  10   2   36.70    2.10
   3  10   2   41.60    2.00
  -4 -10  -2   47.20    1.80
  -4 -10  -2   47.90    1.90
  -4 -10  -2   50.19    1.90
   4  10   2   48.30    2.40
   4  10   2   49.60    2.30
   4  10   2   46.30    2.10
   4  10   2   50.49    2.30
  -5 -10  -2    5.50    0.60
  -5 -10  -2    4.40    0.60
   5  10   2    4.60    0.80
   5  10   2    4.90    0.80
   5  10   2    4.90    1.00
   5  10   2    5.20    0.90
  -6 -10  -2   10.50    0.80
   6  10   2   10.70    1.00
   6  10   2   12.00    0.90
   6  10   2   10.90    1.40
   6  10   2   11.20    1.10
   6  10   2    9.80    1.40
  -7 -10  -2   39.40    1.50
   7  10   2   42.30    1.90
   7  10   2   42.50    1.60
   7  10   2   40.60    2.30
   7  10   2   44.20    2.40
   7  10   2   43.30    1.80
   8  10   2   47.20    2.50
   8  10   2   47.00    1.60
   8  10   2   44.70    1.80
   8  10   2   45.10    1.90
   9  10   2    0.90    0.40
   9  10   2    1.20    0.50
   9  10   2    1.70    0.60
   9  10   2   -0.30    0.50
   9  10   2    1.10    0.80
  10  10   2   20.30    1.20
  10  10   2   22.50    1.10
  10  10   2   23.60    2.00
  10  10   2   21.90    1.30
  10  10   2   22.50    1.80
  11  10   2    1.40    0.70
  11  10   2    1.70    0.40
  11  10   2    0.70    0.80
  11  10   2    1.60    0.50
  12  10   2    1.80    0.50
  12  10   2    1.90    0.50
  12  10   2    1.90    0.50
  12  10   2    1.30    0.80
  12  10   2    1.60    0.70
   5 -11  -2   26.10    2.40
  -5  11   2   30.20    1.60
  -5  11   2   29.20    2.00
  -5  11   2   30.90    3.20
  -5  11   2   25.50    1.50
   4 -11  -2   40.50    4.00
  -4  11   2   47.10    2.20
  -4  11   2   45.40    2.60
  -4  11   2   44.10    2.50
   3 -11  -2    4.10    1.20
  -3  11   2    5.20    1.00
  -3  11   2    5.30    1.10
  -3  11   2    4.50    1.10
   2 -11  -2    8.90    1.50
  -2  11   2    9.90    0.70
  -2  11   2    7.30    1.30
  -2  11   2    7.10    1.10
   1 -11  -2    3.80    0.90
   1 -11  -2    5.00    1.10
   1 -11  -2    5.80    1.10
  -1  11   2    6.40    1.20
  -1  11   2    5.00    1.10
  -1  11   2    5.00    0.80
   0 -11  -2    0.20    0.40
   0 -11  -2    0.40    0.60
   0 -11  -2    0.70    0.60
   0 -11  -2    0.10    0.70
   0  11   2   -0.10    0.70
   0  11   2    0.70    0.50
   0  11   2   -0.10    0.70
  -1 -11  -2   -0.70    0.50
  -1 -11  -2    0.10    0.50
   1  11   2    0.80    0.50
   1  11   2    0.10    0.70
   1  11   2    0.30    0.60
   1  11   2    0.00    0.70
  -2 -11  -2   20.40    1.30
  -2 -11  -2   15.60    1.60
  -2 -11  -2   20.20    1.40
  -2 -11  -2   18.20    1.50
   2  11   2   17.10    1.70
   2  11   2   18.40    1.40
   2  11   2   18.30    1.60
   2  11   2   17.10    1.50
  -3 -11  -2   12.60    1.10
  -3 -11  -2   12.50    1.00
  -3 -11  -2   11.80    1.20
   3  11   2   11.70    1.30
   3  11   2   12.60    1.50
   3  11   2   12.60    1.20
  -4 -11  -2   13.90    1.10
  -4 -11  -2   15.10    1.10
  -4 -11  -2   13.50    1.10
   4  11   2   13.40    1.30
   4  11   2   13.80    1.50
   4  11   2   13.20    1.50
  -5 -11  -2   45.60    1.70
  -5 -11  -2   48.00    1.90
  -5 -11  -2   46.50    1.70
   5  11   2   42.60    2.10
   5  11   2   46.80    2.30
   5  11   2   52.19    2.70
  -6 -11  -2   56.09    2.00
  -6 -11  -2   49.30    2.70
   6  11   2   58.39    2.80
   6  11   2   52.69    2.70
   6  11   2   55.79    2.30
   6  11   2   55.39    2.40
   6  11   2   55.79    2.70
  -7 -11  -2    7.30    1.30
  -7 -11  -2    7.00    0.80
   7  11   2    9.70    1.20
   7  11   2    6.20    1.10
   7  11   2    7.80    0.80
   7  11   2    6.40    1.30
   7  11   2    9.30    1.30
   7  11   2    9.00    1.10
   8  11   2   14.90    1.20
   8  11   2   15.00    1.30
   8  11   2   15.20    1.00
   8  11   2   16.10    1.70
   8  11   2   14.40    1.60
   9  11   2   28.40    2.10
   9  11   2   29.40    1.60
   9  11   2   28.80    2.10
   9  11   2   27.90    1.50
   9  11   2   30.20    1.30
  10  11   2    8.60    0.70
  10  11   2    9.30    1.30
  10  11   2    9.10    1.00
  10  11   2    9.20    1.10
  10  11   2    7.20    1.20
  11  11   2  115.39    3.50
  11  11   2  117.29    3.40
  11  11   2  125.09    4.70
  11  11   2  119.09    4.50
  11  11   2  121.29    3.10
  12  11   2    0.30    0.50
  12  11   2    0.70    0.40
  12  11   2    1.60    0.90
  12  11   2    0.30    0.70
  -4  12   2    7.90    1.10
  -4  12   2    8.40    1.10
  -4  12   2    6.90    1.30
  -4  12   2    8.60    1.30
   3 -12  -2   -0.50    0.90
  -3  12   2    0.20    0.60
  -3  12   2    0.80    0.80
   2 -12  -2   21.80    2.00
  -2  12   2   23.20    1.10
  -2  12   2   23.30    2.00
  -2  12   2   22.40    1.90
   1 -12  -2    9.60    1.40
  -1  12   2   10.30    1.50
  -1  12   2    8.70    1.40
  -1  12   2   10.50    0.90
   0 -12  -2    1.30    0.90
   0  12   2    0.40    0.70
   0  12   2   -0.50    0.70
   0  12   2    1.40    0.60
  -1 -12  -2   -0.10    0.70
  -1 -12  -2    0.20    0.50
  -1 -12  -2   -0.20    0.40
   1  12   2    0.50    0.50
   1  12   2    0.10    0.70
   1  12   2    0.10    0.70
  -2 -12  -2    5.00    1.00
   2  12   2    6.10    1.00
   2  12   2    5.80    1.30
   2  12   2    6.00    1.20
  -3 -12  -2   13.70    1.30
  -3 -12  -2   13.70    1.10
  -3 -12  -2   13.70    1.20
   3  12   2   15.10    1.50
   3  12   2    8.60    1.20
  -4 -12  -2    0.70    0.50
  -4 -12  -2    0.50    0.50
  -4 -12  -2    1.60    0.60
   4  12   2    0.30    0.70
   4  12   2    1.10    0.60
   4  12   2    1.40    0.80
   4  12   2    0.50    0.60
  -5 -12  -2   71.09    2.30
  -5 -12  -2   72.89    2.60
  -5 -12  -2   70.69    2.30
   5  12   2   71.09    3.00
   5  12   2   74.79    2.90
   5  12   2   74.89    3.10
   5  12   2   71.09    3.30
  -6 -12  -2   23.30    0.90
  -6 -12  -2   22.30    1.30
  -6 -12  -2   24.70    0.90
   6  12   2   24.80    1.80
   6  12   2   23.10    2.00
   6  12   2   22.10    1.60
   6  12   2   23.70    2.00
  -7 -12  -2   10.40    0.90
   7  12   2   11.00    1.50
   7  12   2   11.60    1.20
   7  12   2    8.90    1.30
   8  12   2    0.00    0.80
   8  12   2    0.60    0.70
   8  12   2    1.80    0.70
   8  12   2    1.20    0.60
   9  12   2   19.20    1.10
   9  12   2   23.20    2.00
   9  12   2   19.40    1.90
   9  12   2   17.50    1.30
   9  12   2   19.70    1.50
  10  12   2   31.10    1.70
  10  12   2   28.30    2.20
  10  12   2   25.70    2.20
  10  12   2   27.50    1.50
  10  12   2   28.90    1.30
  11  12   2   77.59    3.60
  11  12   2   72.29    2.10
  11  12   2   74.29    2.50
  11  12   2   68.89    2.70
  11  12   2   53.99    4.30
   2 -13  -2   25.10    2.20
  -2  13   2   20.70    2.10
  -2  13   2   24.20    2.10
   1 -13  -2   -1.10    0.80
  -1  13   2   -1.10    0.80
  -1  13   2   -0.70    0.80
  -1  13   2   -0.20    0.40
   0 -13  -2   18.20    1.90
   0  13   2   21.10    1.90
   0  13   2   21.30    1.30
   0  13   2   19.60    2.00
  -1 -13  -2   14.90    1.60
   1  13   2   15.90    1.40
   1  13   2   17.20    1.90
   1  13   2   14.70    1.70
  -2 -13  -2    0.10    0.60
  -2 -13  -2    0.80    0.60
  -2 -13  -2    1.00    0.60
   2  13   2   -0.30    0.80
   2  13   2    1.60    0.80
  -3 -13  -2    6.00    1.00
  -3 -13  -2    3.20    0.70
   3  13   2    8.00    1.20
   3  13   2    5.90    1.20
   3  13   2    4.20    1.20
  -4 -13  -2   34.30    1.70
  -4 -13  -2   30.90    2.00
  -4 -13  -2   30.80    1.70
   4  13   2   32.50    2.40
   4  13   2   28.60    2.00
   4  13   2   36.80    3.20
  -5 -13  -2    1.90    0.50
  -5 -13  -2    1.70    0.60
  -5 -13  -2    2.10    0.60
   5  13   2    3.50    0.90
   5  13   2    1.10    0.90
  -6 -13  -2    0.40    0.40
  -6 -13  -2    0.70    0.40
  -6 -13  -2    0.70    0.30
   6  13   2    1.10    0.70
   6  13   2   -0.20    0.80
   6  13   2    1.50    0.90
  -7 -13  -2    5.60    0.80
   7  13   2    5.10    1.30
   7  13   2    3.20    1.20
   7  13   2    4.80    1.00
  -8 -13  -2   59.49    2.10
   8  13   2   60.09    3.20
   8  13   2   54.79    3.10
   8  13   2   58.49    2.50
   9  13   2    5.70    0.90
   9  13   2    7.80    1.50
   9  13   2    4.70    1.00
   9  13   2    9.00    2.10
  10  13   2   -0.60    0.60
  10  13   2    1.30    0.90
  10  13   2    0.90    0.60
  10  13   2    0.10    0.60
   0 -14  -2   41.10    2.70
   0  14   2   41.90    2.80
   0  14   2   44.30    2.00
   0  14   2   42.70    2.90
  -1 -14  -2   18.70    1.80
   1  14   2   22.40    1.50
   1  14   2   20.40    2.00
  -2 -14  -2   11.20    1.50
   2  14   2    8.00    1.40
   2  14   2   15.00    1.30
  -3 -14  -2   -0.10    0.60
  -3 -14  -2    2.30    0.70
   3  14   2   -0.30    0.80
   3  14   2    0.70    0.70
  -4 -14  -2   48.10    2.30
  -4 -14  -2   48.00    2.30
   4  14   2   50.29    3.10
   4  14   2   47.00    2.60
  -5 -14  -2   53.79    2.10
  -5 -14  -2   53.49    2.00
   5  14   2   55.19    2.80
   5  14   2   47.70    3.00
   5  14   2   50.59    3.10
  -6 -14  -2    7.80    0.60
  -6 -14  -2   10.00    1.00
   6  14   2    7.50    1.40
   6  14   2    6.40    1.40
   6  14   2    8.30    1.30
  -7 -14  -2    3.60    0.70
   7  14   2    2.50    1.10
   7  14   2    2.80    0.90
  -8 -14  -2    0.00    0.40
   8  14   2    0.30    0.80
   8  14   2    1.50    0.70
   8  14   2   -0.60    0.70
   9  14   2   27.40    1.80
   9  14   2   26.60    2.40
   9  14   2   31.60    2.60
   2  15   2   17.30    1.90
   2  15   2   20.40    2.50
  -3 -15  -2    5.80    1.10
   3  15   2    5.80    1.30
   3  15   2    5.00    1.30
   3  15   2    5.80    1.60
  -4 -15  -2    8.40    1.00
  -4 -15  -2    5.60    1.00
   4  15   2    4.60    1.20
   4  15   2    4.80    1.30
   4  15   2    6.20    1.30
  -5 -15  -2   23.00    1.40
   5  15   2   22.90    2.30
   5  15   2   19.60    2.30
   5  15   2   26.00    2.10
  -6 -15  -2   35.80    1.90
   6  15   2   32.90    2.80
   6  15   2   33.00    2.70
   7  15   2    0.80    0.80
   7  15   2   -0.30    0.80
   7  15   2    0.50    1.30
   7  14  -3   34.60    2.00
   7  14  -3   40.00    2.20
   7  14  -3   34.10    2.70
   6  14  -3    4.00    1.00
   6  14  -3    4.50    0.90
   6  14  -3    3.80    1.10
   5  14  -3    7.80    1.40
   5  14  -3   13.00    1.50
   5  14  -3   14.10    1.50
   4  14  -3    5.30    1.10
   4  14  -3    5.90    1.20
   4  14  -3    3.40    1.20
  -4 -14   3    5.70    0.80
  -4 -14   3    6.30    0.80
   3  14  -3    7.90    1.30
   2  14  -3   13.00    2.00
   2  14  -3    9.70    1.70
  -2 -14   3    9.70    1.20
  -2 -14   3   12.80    1.40
   1  14  -3   33.00    2.70
   1  14  -3   34.80    2.40
  -1 -14   3   40.20    2.40
   0  14  -3   72.29    3.00
   0  14  -3   75.49    3.50
   0  14  -3   84.89    5.80
   0 -14   3   81.29    3.50
  -1  14  -3   61.19    5.10
  -1  14  -3   77.19    4.40
   1 -14   3   65.39    3.30
   9  13  -3   34.40    2.70
   9  13  -3   36.60    2.00
   9  13  -3   31.80    2.50
   9  13  -3   32.80    1.80
   8  13  -3   39.10    2.00
   8  13  -3   34.00    2.60
   8  13  -3   36.50    2.00
   7  13  -3   33.70    1.90
   7  13  -3   37.20    3.30
   7  13  -3   35.20    2.00
   6  13  -3    1.60    0.90
   6  13  -3    0.70    0.60
   6  13  -3    0.40    0.60
   5  13  -3   48.30    3.00
   5  13  -3   48.40    2.40
   5  13  -3   48.30    2.40
   4  13  -3   22.40    1.70
   4  13  -3   17.80    1.90
   4  13  -3   18.80    1.60
  -4 -13   3   20.50    1.40
  -4 -13   3   19.60    1.20
   3  13  -3   14.00    1.80
   3  13  -3   12.40    1.50
   3  13  -3   14.40    1.60
  -3 -13   3   12.20    1.10
  -3 -13   3   15.30    1.30
   2  13  -3    1.00    0.70
   2  13  -3    0.90    0.70
   2  13  -3    1.60    0.90
  -2 -13   3   -0.60    0.60
   1  13  -3    3.80    1.00
   1  13  -3    5.10    1.10
   1  13  -3    5.00    0.90
  -1 -13   3    5.70    1.00
  -1 -13   3    3.80    1.00
   0  13  -3   18.50    1.80
   0  13  -3   16.20    1.80
   0 -13   3   18.20    1.80
  -1  13  -3   14.00    2.50
  -1  13  -3   12.80    1.80
   1 -13   3   12.00    1.60
  -2  13  -3    0.40    0.80
  -2  13  -3    0.60    0.80
  -3  13  -3   12.90    1.70
  -3  13  -3   13.40    1.80
   3 -13   3   14.50    1.90
  10  12  -3    1.10    0.40
  10  12  -3    0.40    0.80
  10  12  -3   -0.70    0.70
  10  12  -3    0.60    0.50
   9  12  -3   92.29    3.30
   9  12  -3   84.69    3.30
   9  12  -3   87.49    3.00
   9  12  -3   92.09    4.00
   9  12  -3   92.89    4.60
   8  12  -3   87.79    3.00
   8  12  -3   89.99    3.20
   8  12  -3   85.49    4.00
   7  12  -3   20.40    2.00
   7  12  -3   20.90    1.50
   7  12  -3   21.60    1.80
   7  12  -3   20.20    1.40
  -7 -12   3   21.10    1.50
   6  12  -3   16.60    1.60
   6  12  -3   13.50    1.30
   6  12  -3   17.80    1.90
   6  12  -3   14.30    1.40
  -6 -12   3   15.20    1.30
   5  12  -3    3.70    0.90
   5  12  -3    3.00    1.00
   5  12  -3    3.50    0.80
   5  12  -3    3.30    0.90
  -5 -12   3    3.30    0.70
   4  12  -3    2.50    0.80
   4  12  -3    1.90    0.90
   4  12  -3    2.30    0.70
   4  12  -3    1.10    0.70
  -4 -12   3    2.00    0.50
  -4 -12   3    2.20    0.70
  -4 -12   3    2.20    0.50
   3  12  -3   -0.10    0.60
   3  12  -3   -0.20    0.50
   3  12  -3    0.70    0.60
   3  12  -3   -0.20    0.60
  -3 -12   3    0.30    0.50
  -3 -12   3   -0.10    0.40
  -3 -12   3    1.00    0.60
   2  12  -3    4.20    1.10
   2  12  -3    5.70    1.10
   2  12  -3    4.30    1.00
  -2 -12   3    5.00    0.90
  -2 -12   3    5.00    0.90
   1  12  -3  136.19    4.60
   1  12  -3  134.29    4.80
  -1 -12   3  135.99    4.40
   0  12  -3    0.80    0.70
   0  12  -3    0.20    0.50
   0  12  -3    1.60    0.80
   0 -12   3    0.40    0.70
   0 -12   3    1.20    0.60
  -1  12  -3   92.19    3.60
  -1  12  -3   85.19    3.00
  -1  12  -3   88.89    3.70
   1 -12   3   90.49    3.70
  -2  12  -3    8.30    1.40
  -2  12  -3    6.40    1.20
   2 -12   3    8.00    1.40
  -3  12  -3   25.60    2.00
  -3  12  -3   30.00    2.20
   3 -12   3   31.00    2.40
  -4  12  -3    1.40    0.90
  -4  12  -3    4.10    1.10
   4 -12   3    3.60    1.20
  10  11  -3    9.50    0.90
  10  11  -3   11.20    1.10
  10  11  -3    8.20    1.30
  10  11  -3    8.50    1.50
  10  11  -3    8.70    1.00
   9  11  -3   15.10    1.30
   9  11  -3   16.10    1.90
   9  11  -3   14.90    1.20
   9  11  -3   11.30    1.50
   9  11  -3   14.00    1.10
   8  11  -3    5.50    1.00
   8  11  -3    5.20    1.10
   8  11  -3    4.40    0.80
   8  11  -3    6.10    0.80
   7  11  -3    8.30    1.00
   7  11  -3    7.90    1.00
   7  11  -3    8.80    1.10
   7  11  -3    8.80    1.50
   6  11  -3   29.10    1.60
   6  11  -3   29.30    1.70
   6  11  -3   25.10    1.70
   6  11  -3   25.70    2.10
  -6 -11   3   28.00    1.90
   5  11  -3   41.10    2.00
   5  11  -3   42.70    2.60
   5  11  -3   39.90    2.30
   5  11  -3   44.00    2.00
   5  11  -3   42.50    2.20
  -5 -11   3   41.50    2.00
   4  11  -3   51.69    2.50
   4  11  -3   48.50    2.20
   4  11  -3   47.10    2.40
   4  11  -3   51.49    2.70
   4  11  -3   55.59    2.30
  -4 -11   3   50.59    1.70
  -4 -11   3   53.99    2.30
  -4 -11   3   53.19    1.70
   3  11  -3    5.60    1.10
   3  11  -3    7.10    1.10
   3  11  -3    6.10    1.00
  -3 -11   3    7.20    0.90
  -3 -11   3    7.50    0.90
   2  11  -3   99.89    3.90
   2  11  -3   95.59    4.70
   2  11  -3  107.69    3.60
   2  11  -3   99.39    3.50
   2  11  -3   98.69    3.80
  -2 -11   3  105.29    3.40
   1  11  -3    0.30    0.60
   1  11  -3    0.00    0.60
   1  11  -3    0.00    0.50
   1  11  -3    0.70    0.50
   1  11  -3    1.20    0.70
  -1 -11   3    0.20    0.20
  -1 -11   3   -0.70    0.60
  -1 -11   3    0.70    0.50
   0  11  -3   25.80    1.60
   0  11  -3   28.70    2.00
   0  11  -3   26.90    1.80
   0  11  -3   29.50    2.60
   0 -11   3   31.60    1.80
   0 -11   3   29.00    2.30
  -1  11  -3   52.59    2.60
  -1  11  -3   56.69    2.70
  -1  11  -3   49.70    2.10
   1 -11   3   52.39    2.40
   1 -11   3   48.80    2.60
  -2  11  -3    7.20    1.20
  -2  11  -3    9.40    1.30
  -2  11  -3    9.10    1.30
   2 -11   3    8.20    1.40
  -3  11  -3   50.99    2.70
  -3  11  -3   56.29    2.70
  -3  11  -3   51.89    2.60
   3 -11   3   56.09    3.00
  -4  11  -3    1.80    0.90
  -4  11  -3    0.80    0.70
   4 -11   3    0.80    1.00
  -5  11  -3    4.00    1.00
  -5  11  -3    2.90    0.90
   5 -11   3    2.80    1.20
  -6  11  -3    4.70    0.90
  -6  11  -3    3.30    1.00
   6 -11   3    4.40    1.60
  11  10  -3    2.00    0.60
  11  10  -3    4.10    0.50
  11  10  -3    3.70    1.00
  11  10  -3    3.50    1.00
  10  10  -3    0.60    0.40
  10  10  -3    0.90    0.60
  10  10  -3    1.80    0.50
  10  10  -3    1.10    0.70
  10  10  -3    1.50    0.50
   9  10  -3   31.20    2.10
   9  10  -3   32.70    2.30
   9  10  -3   31.30    2.00
   9  10  -3   28.40    1.30
   9  10  -3   29.90    1.50
   8  10  -3   44.80    2.60
   8  10  -3   47.90    2.10
   8  10  -3   44.90    2.00
   8  10  -3   44.60    1.80
   7  10  -3   11.00    1.40
   7  10  -3   11.60    1.10
   7  10  -3   11.80    1.00
   7  10  -3   10.80    1.10
  -7 -10   3   12.10    1.10
   6  10  -3   73.49    2.80
   6  10  -3   81.09    3.40
   6  10  -3   76.39    2.60
   6  10  -3   79.49    2.80
  -6 -10   3   77.59    2.80
   5  10  -3   13.20    1.20
   5  10  -3   12.70    1.10
   5  10  -3   14.60    1.30
   5  10  -3   14.80    1.60
  -5 -10   3   13.50    1.20
   4  10  -3    0.80    0.70
   4  10  -3    0.10    0.50
   4  10  -3    0.60    0.80
   4  10  -3   -0.10    0.50
  -4 -10   3    0.60    0.30
  -4 -10   3    0.00    0.30
  -4 -10   3    0.90    0.50
   3  10  -3    4.20    0.80
   3  10  -3    4.10    0.80
   3  10  -3    4.60    0.90
   3  10  -3    5.90    1.10
   3  10  -3    5.80    1.10
  -3 -10   3    4.80    0.70
  -3 -10   3    4.00    0.60
  -3 -10   3    4.30    0.70
   2  10  -3  225.78    6.30
   2  10  -3  225.38    5.90
   2  10  -3  210.28    5.90
   2  10  -3  206.68    6.00
   2  10  -3  215.98    5.80
  -2 -10   3  215.58    5.60
  -2 -10   3  207.58    5.70
   1  10  -3  263.67    7.10
   1  10  -3  261.57    6.80
   1  10  -3  260.07    6.70
   1  10  -3  261.57    7.20
   1  10  -3  261.67    6.80
  -1 -10   3  254.17    6.60
  -1 -10   3  259.17    6.60
  -1 -10   3  248.18    6.70
   0  10  -3  196.38    5.50
   0  10  -3  188.98    5.10
   0  10  -3  192.48    5.70
   0  10  -3  187.38    5.40
   0 -10   3  179.78    5.20
   0 -10   3  188.78    5.40
  -1  10  -3   13.50    1.20
  -1  10  -3   14.50    1.40
  -1  10  -3   14.10    1.40
   1 -10   3   12.30    1.40
   1 -10   3   15.00    1.60
  -2  10  -3   38.50    2.10
  -2  10  -3   35.50    2.00
   2 -10   3   33.30    2.10
   2 -10   3   32.70    2.00
   2 -10   3   35.00    2.20
   2 -10   3   32.10    1.90
  -3  10  -3    0.00    0.60
  -3  10  -3    1.50    0.70
   3 -10   3    1.40    0.80
   3 -10   3    1.90    0.70
  -4  10  -3    1.40    0.50
  -4  10  -3    1.00    0.60
  -4  10  -3    1.50    0.80
   4 -10   3    0.70    0.90
   4 -10   3    1.80    0.70
  -5  10  -3   24.30    1.70
  -5  10  -3   22.70    1.80
  -5  10  -3   21.80    1.60
   5 -10   3   24.80    2.20
  -6  10  -3   12.70    1.30
  -6  10  -3   11.50    1.50
  -6  10  -3   14.30    1.30
  -7  10  -3   44.30    2.30
  -7  10  -3   45.10    2.50
  -7  10  -3   50.09    2.20
   7 -10   3   50.09    3.20
  11   9  -3   20.10    0.90
  11   9  -3   19.10    1.70
  11   9  -3   18.80    1.80
  11   9  -3   19.90    1.50
  11   9  -3   18.40    0.90
  10   9  -3   31.60    2.00
  10   9  -3   34.00    2.20
  10   9  -3   34.10    1.90
  10   9  -3   33.90    1.30
  10   9  -3   33.20    1.40
   9   9  -3    8.50    1.10
   9   9  -3    8.80    0.70
   9   9  -3    6.90    1.20
   9   9  -3    9.00    0.90
   9   9  -3    8.30    1.30
   8   9  -3    1.20    0.80
   8   9  -3    1.00    0.40
   8   9  -3    2.00    0.60
   8   9  -3    2.00    0.60
   7   9  -3   18.10    1.70
   7   9  -3   17.80    1.30
   7   9  -3   17.70    1.20
   7   9  -3   16.00    1.00
   6   9  -3  158.88    5.10
   6   9  -3  154.88    4.10
   6   9  -3  155.78    4.40
   6   9  -3  163.68    4.50
  -6  -9   3  156.68    4.50
   5   9  -3   37.00    1.70
   5   9  -3   39.80    1.80
   5   9  -3   40.80    2.30
   5   9  -3   40.50    1.80
  -5  -9   3   36.00    1.80
   4   9  -3   20.10    1.50
   4   9  -3   19.10    1.20
   4   9  -3   16.30    1.30
   4   9  -3   17.40    1.60
   4   9  -3   17.80    1.30
  -4  -9   3   18.50    0.80
  -4  -9   3   18.00    1.20
  -4  -9   3   19.70    0.80
   3   9  -3  134.19    4.40
   3   9  -3  130.49    3.90
   3   9  -3  135.79    4.10
   3   9  -3  135.39    3.90
   3   9  -3  132.49    4.10
  -3  -9   3  135.49    3.50
  -3  -9   3  127.89    3.40
  -3  -9   3  130.59    3.90
   2   9  -3    1.50    0.60
   2   9  -3    3.30    0.70
   2   9  -3    1.80    0.80
   2   9  -3    2.10    0.60
   2   9  -3    3.50    0.80
  -2  -9   3    2.20    0.60
  -2  -9   3    3.20    0.70
   1   9  -3   78.69    2.80
   1   9  -3   76.99    2.80
   1   9  -3   74.99    3.00
   1   9  -3   76.69    2.70
   1   9  -3   78.79    3.10
  -1  -9   3   74.79    2.60
  -1  -9   3   76.79    2.70
  -1  -9   3   75.89    2.70
   0   9  -3    7.00    1.10
   0   9  -3    7.10    0.90
   0   9  -3    7.50    1.10
   0   9  -3    6.60    1.10
   0   9  -3    6.30    0.90
   0  -9   3    9.00    1.20
   0  -9   3    7.60    1.00
   0  -9   3    6.60    0.90
  -1   9  -3   37.00    2.00
  -1   9  -3   38.90    2.00
  -1   9  -3   38.60    1.70
   1  -9   3   39.00    1.90
   1  -9   3   36.30    1.90
   1  -9   3   39.40    2.10
   1  -9   3   41.20    2.20
  -2   9  -3    1.20    0.60
  -2   9  -3    1.20    0.60
  -2   9  -3    0.20    0.60
   2  -9   3    0.20    0.50
   2  -9   3    1.70    0.80
  -3   9  -3   17.50    1.40
  -3   9  -3   20.70    1.50
  -3   9  -3   20.40    1.50
   3  -9   3   13.90    1.20
   3  -9   3   21.80    1.60
   3  -9   3   19.70    1.70
  -4   9  -3    5.90    0.90
  -4   9  -3    7.00    1.10
  -4   9  -3    6.20    1.10
  -4   9  -3    7.10    1.10
   4  -9   3    4.30    1.10
   4  -9   3    8.60    1.10
  -5   9  -3    3.80    1.00
  -5   9  -3    3.90    0.80
  -5   9  -3    3.90    0.80
   5  -9   3    3.30    1.10
   5  -9   3    4.20    0.80
  -6   9  -3    2.30    0.90
  -6   9  -3    2.90    0.70
   6  -9   3    4.50    1.20
  -7   9  -3    2.00    0.50
  -7   9  -3    0.20    0.60
   7  -9   3    0.90    1.00
  -8   9  -3   23.90    1.80
   8  -9   3   25.90    2.40
  12   8  -3    8.00    1.10
  12   8  -3    6.50    1.30
  12   8  -3    7.00    1.00
  11   8  -3   13.60    1.40
  11   8  -3   14.70    1.50
  11   8  -3   15.40    1.30
  10   8  -3   66.19    3.00
  10   8  -3   58.69    1.80
  10   8  -3   59.99    2.90
  10   8  -3   62.39    1.70
   9   8  -3   13.30    1.20
   9   8  -3   14.10    1.40
   9   8  -3   13.00    1.40
   9   8  -3   15.20    0.90
   9   8  -3   16.70    0.80
   8   8  -3  120.69    4.40
   8   8  -3  127.29    3.80
   8   8  -3  120.89    3.10
   8   8  -3  118.19    4.20
   8   8  -3  120.89    3.30
   7   8  -3   12.40    1.50
   7   8  -3   11.20    1.00
   7   8  -3   11.30    0.90
   7   8  -3    9.10    1.60
   7   8  -3   11.20    0.90
   6   8  -3    3.40    0.80
   6   8  -3    4.40    0.70
   6   8  -3    3.70    0.60
   6   8  -3    3.70    0.70
  -6  -8   3    4.10    0.80
   5   8  -3    0.50    0.40
   5   8  -3    0.40    0.50
   5   8  -3   -0.60    0.30
   5   8  -3    0.10    0.50
  -5  -8   3    0.20    0.60
  -5  -8   3    0.40    0.40
   4   8  -3    5.50    0.70
   4   8  -3    5.30    0.70
   4   8  -3    3.30    0.70
   4   8  -3    3.50    0.70
   4   8  -3    3.50    0.70
  -4  -8   3    5.50    0.70
  -4  -8   3    3.90    0.90
   3   8  -3   38.10    1.70
   3   8  -3   43.90    2.00
   3   8  -3   41.00    1.80
   3   8  -3   39.60    1.80
   3   8  -3   40.80    2.10
  -3  -8   3   39.90    1.50
  -3  -8   3   39.50    1.40
  -3  -8   3   40.40    2.00
  -3  -8   3   41.20    1.80
   2   8  -3    2.90    0.70
   2   8  -3    1.50    0.60
   2   8  -3    2.90    0.60
   2   8  -3    3.40    0.80
   2   8  -3    3.40    0.70
  -2  -8   3    3.90    0.60
  -2  -8   3    4.40    0.70
  -2  -8   3    2.80    0.60
  -2  -8   3    1.40    0.60
   1   8  -3  234.48    6.20
   1   8  -3  225.08    5.80
   1   8  -3  234.58    6.10
   1   8  -3  233.68    5.90
  -1  -8   3  234.58    6.00
  -1  -8   3  230.98    5.80
  -1  -8   3  232.08    5.70
  -1  -8   3  228.78    5.80
   0   8  -3    7.10    0.90
   0   8  -3    8.10    0.90
   0   8  -3    6.50    0.90
   0   8  -3    8.80    1.20
   0   8  -3    8.90    1.10
   0  -8   3    6.20    0.90
   0  -8   3    8.20    1.00
   0  -8   3    6.10    0.80
   0  -8   3    6.70    0.90
  -1   8  -3   20.60    1.40
  -1   8  -3   19.00    1.40
  -1   8  -3   17.30    1.30
  -1   8  -3   17.70    1.40
  -1   8  -3   20.10    1.10
   1  -8   3   20.60    1.30
   1  -8   3   16.40    1.40
   1  -8   3   18.90    1.30
   1  -8   3   19.30    1.50
  -2   8  -3   30.80    1.70
  -2   8  -3   28.50    1.70
  -2   8  -3   29.30    1.70
   2  -8   3   29.90    1.90
   2  -8   3   30.80    1.70
   2  -8   3   30.90    1.80
   2  -8   3   29.10    1.60
  -3   8  -3    0.20    0.50
  -3   8  -3    0.60    0.50
  -3   8  -3    0.70    0.60
  -3   8  -3    0.20    0.50
   3  -8   3    0.30    0.70
   3  -8   3   -0.10    0.40
  -4   8  -3    3.00    0.70
  -4   8  -3    2.40    0.70
  -4   8  -3    2.70    0.80
   4  -8   3    1.90    0.60
  -5   8  -3    1.40    0.70
  -5   8  -3    0.50    0.50
  -5   8  -3    0.60    0.50
   5  -8   3    1.70    0.90
   5  -8   3   -0.30    0.20
   5  -8   3    0.40    0.40
   5  -8   3    1.30    0.50
  -6   8  -3    1.00    0.70
  -6   8  -3    0.20    0.50
  -6   8  -3    0.10    0.50
  -6   8  -3   -0.10    0.60
   6  -8   3   -0.50    0.80
   6  -8   3   -0.20    0.40
  -7   8  -3   35.80    2.20
  -7   8  -3   36.40    2.00
  -7   8  -3   38.90    1.80
  -7   8  -3   39.40    1.90
   7  -8   3   42.20    2.70
  -8   8  -3  131.89    4.60
  -8   8  -3  134.49    4.10
  -8   8  -3  138.19    4.30
   8  -8   3  145.69    5.20
  -9   8  -3    1.60    0.70
  -9   8  -3    2.70    1.00
   9  -8   3    2.50    1.20
  12   7  -3   14.50    1.40
  12   7  -3   12.80    1.20
  12   7  -3   13.50    1.50
  11   7  -3    1.10    0.60
  11   7  -3    0.70    0.60
  11   7  -3    1.10    0.70
  10   7  -3  116.39    4.20
  10   7  -3  117.29    3.80
  10   7  -3  114.09    2.70
   9   7  -3  119.39    4.30
   9   7  -3  118.89    3.80
   9   7  -3  118.59    2.90
   9   7  -3  126.59    4.30
   9   7  -3  119.09    3.00
   9   7  -3  121.29    3.90
   8   7  -3   22.30    1.70
   8   7  -3   24.10    1.50
   8   7  -3   24.50    1.00
   8   7  -3   24.20    1.00
   8   7  -3   24.90    1.80
   7   7  -3    8.90    1.10
   7   7  -3   11.30    1.20
   7   7  -3    9.20    0.70
   7   7  -3    9.00    1.00
   7   7  -3   11.00    0.80
   6   7  -3  399.06   10.00
   6   7  -3  409.46    8.90
   6   7  -3  413.36   10.00
   6   7  -3  413.66    9.00
   6   7  -3  409.36    9.40
  -6  -7   3  402.46   10.00
   5   7  -3   14.70    1.20
   5   7  -3   15.70    1.40
   5   7  -3   16.30    0.90
   5   7  -3   15.20    1.00
   5   7  -3   15.20    1.10
  -5  -7   3   16.10    1.10
  -5  -7   3   13.90    1.30
   4   7  -3   70.89    2.40
   4   7  -3   70.99    2.60
   4   7  -3   71.29    2.20
   4   7  -3   70.09    2.30
   4   7  -3   70.99    2.80
  -4  -7   3   69.49    2.40
  -4  -7   3   64.69    2.60
   3   7  -3  102.09    3.00
   3   7  -3  103.99    3.10
   3   7  -3   99.39    3.40
   3   7  -3  102.09    2.90
   3   7  -3  102.79    3.30
  -3  -7   3  100.49    3.30
  -3  -7   3  103.69    2.60
  -3  -7   3  104.99    2.60
  -3  -7   3  101.99    3.00
   2   7  -3   47.80    1.90
   2   7  -3   50.49    1.90
   2   7  -3   52.89    2.30
   2   7  -3   50.09    2.20
   2   7  -3   51.59    2.00
  -2  -7   3   53.69    2.10
  -2  -7   3   50.39    1.70
  -2  -7   3   47.40    1.90
  -2  -7   3   55.69    2.50
   1   7  -3   14.40    1.00
   1   7  -3   13.00    1.10
   1   7  -3   12.80    1.00
   1   7  -3   13.40    1.00
  -1  -7   3   14.70    1.00
  -1  -7   3   13.10    1.00
  -1  -7   3   12.50    0.90
   0   7  -3  268.07    6.60
   0   7  -3  253.47    6.30
   0   7  -3  259.97    6.20
   0   7  -3  266.27    6.60
   0   7  -3  258.67    6.40
   0  -7   3  253.17    6.20
   0  -7   3  266.67    6.30
   0  -7   3  264.07    6.40
   0  -7   3  254.47    6.30
  -1   7  -3    3.70    0.70
  -1   7  -3    4.40    0.60
  -1   7  -3    4.10    0.70
  -1   7  -3    3.50    0.70
  -1   7  -3    4.40    0.80
   1  -7   3    4.10    0.80
   1  -7   3    4.90    0.70
   1  -7   3    3.60    0.80
   1  -7   3    4.20    0.70
  -2   7  -3    1.00    0.50
  -2   7  -3    1.30    0.60
  -2   7  -3    1.00    0.60
  -2   7  -3    2.50    0.60
   2  -7   3    1.90    0.60
   2  -7   3    1.80    0.60
   2  -7   3    1.40    0.70
   2  -7   3    1.70    0.60
  -3   7  -3   16.80    1.20
  -3   7  -3   16.20    1.40
  -3   7  -3   17.30    1.30
  -3   7  -3   16.50    1.30
   3  -7   3   15.50    1.20
   3  -7   3   17.50    1.50
   3  -7   3   17.60    1.20
   3  -7   3   15.70    1.20
  -4   7  -3   11.10    1.30
  -4   7  -3   12.60    1.20
  -4   7  -3   12.20    1.00
  -4   7  -3   11.20    1.10
   4  -7   3   10.30    1.00
   4  -7   3   10.60    1.30
  -5   7  -3   21.00    1.50
  -5   7  -3   21.60    1.30
  -5   7  -3   22.90    1.60
  -5   7  -3   21.40    1.40
   5  -7   3   20.30    2.40
   5  -7   3   21.60    1.80
   5  -7   3   21.20    1.30
  -6   7  -3  120.29    3.40
  -6   7  -3  121.79    3.70
  -6   7  -3  116.99    4.00
  -6   7  -3  116.69    3.80
   6  -7   3  115.79    4.00
   6  -7   3  124.49    4.40
   6  -7   3  119.69    4.00
   6  -7   3  123.19    3.60
  -7   7  -3   17.00    1.30
  -7   7  -3   16.30    1.40
  -7   7  -3   17.50    1.10
   7  -7   3   16.60    1.90
  -8   7  -3   38.40    1.80
  -8   7  -3   36.60    2.20
   8  -7   3   35.90    2.50
  -9   7  -3    1.00    0.60
  -9   7  -3    0.60    0.70
   9  -7   3    0.60    0.90
  12   6  -3    0.60    0.50
  12   6  -3    0.70    0.60
  12   6  -3    0.40    0.60
  11   6  -3    0.20    0.50
  11   6  -3   -0.30    0.40
  11   6  -3    0.10    0.50
  10   6  -3   25.50    1.90
  10   6  -3   24.50    1.70
  10   6  -3   25.60    1.50
   9   6  -3   13.90    1.20
   9   6  -3   13.10    1.20
   9   6  -3   12.80    1.30
   9   6  -3   15.50    1.40
   9   6  -3   12.60    0.60
   9   6  -3   13.30    0.70
   8   6  -3   13.60    1.20
   8   6  -3   13.70    0.70
   8   6  -3   12.70    0.60
   8   6  -3   12.90    1.30
   8   6  -3   12.20    1.10
   8   6  -3   13.20    1.30
   7   6  -3    7.00    1.00
   7   6  -3    8.40    0.60
   7   6  -3    7.40    1.10
   7   6  -3    8.80    1.00
   7   6  -3    7.80    0.50
  -7  -6   3    7.00    1.10
   6   6  -3    5.60    0.60
   6   6  -3    3.30    0.60
   6   6  -3    5.00    0.80
   6   6  -3    4.40    0.90
  -6  -6   3    6.00    1.00
   5   6  -3   28.80    1.40
   5   6  -3   28.60    1.60
   5   6  -3   29.00    1.20
   5   6  -3   30.90    1.10
   5   6  -3   26.40    1.60
  -5  -6   3   28.30    1.60
  -5  -6   3   27.80    1.40
   4   6  -3   11.30    0.90
   4   6  -3   10.20    1.00
   4   6  -3   11.30    0.70
   4   6  -3   10.90    1.00
   4   6  -3   10.70    0.80
  -4  -6   3   11.20    1.10
  -4  -6   3   11.00    0.90
   3   6  -3   24.70    1.40
   3   6  -3   24.30    1.20
   3   6  -3   26.40    1.10
   3   6  -3   26.40    1.30
  -3  -6   3   26.20    1.20
  -3  -6   3   24.50    1.40
  -3  -6   3   26.00    0.90
  -3  -6   3   25.20    0.80
   2   6  -3   40.40    1.60
   2   6  -3   43.00    1.70
   2   6  -3   40.20    1.60
   2   6  -3   41.60    1.90
   2   6  -3   41.30    1.50
  -2  -6   3   44.30    1.40
  -2  -6   3   38.40    1.70
  -2  -6   3   42.20    1.50
  -2  -6   3   42.10    1.60
   1   6  -3   20.30    1.20
   1   6  -3   22.70    1.20
   1   6  -3   21.60    1.10
   1   6  -3   19.60    1.10
   1   6  -3   20.60    1.30
  -1  -6   3   22.30    1.00
  -1  -6   3   21.80    1.20
  -1  -6   3   21.20    1.10
  -1  -6   3   21.00    1.20
   0   6  -3   43.90    1.80
   0   6  -3   45.70    1.70
   0   6  -3   44.60    1.60
   0   6  -3   45.70    1.90
   0   6  -3   41.40    1.70
   0  -6   3   46.20    1.70
   0  -6   3   43.90    1.70
   0  -6   3   48.00    1.80
  -1   6  -3    2.10    0.40
  -1   6  -3    1.10    0.50
  -1   6  -3    1.20    0.40
  -1   6  -3    1.80    0.50
  -1   6  -3    1.10    0.50
   1  -6   3    0.80    0.30
   1  -6   3    0.50    0.40
   1  -6   3    1.50    0.60
   1  -6   3    1.50    0.40
   1  -6   3    1.50    0.50
  -2   6  -3   63.89    2.30
  -2   6  -3   65.69    2.30
  -2   6  -3   66.39    2.30
  -2   6  -3   67.19    2.50
   2  -6   3   65.79    2.30
   2  -6   3   63.89    2.30
   2  -6   3   66.69    2.00
   2  -6   3   65.59    2.50
   2  -6   3   69.99    2.30
  -3   6  -3  416.66    9.50
  -3   6  -3  408.76    9.30
  -3   6  -3  399.36    9.40
  -3   6  -3  407.66    9.70
   3  -6   3  412.26    9.50
   3  -6   3  407.76    9.50
   3  -6   3  415.06    9.40
   3  -6   3  413.76    9.70
  -4   6  -3   72.49    2.30
  -4   6  -3   66.19    2.80
  -4   6  -3   69.99    2.70
  -4   6  -3   70.39    2.50
   4  -6   3   73.19    2.60
   4  -6   3   75.09    2.70
   4  -6   3   74.09    2.40
   4  -6   3   72.59    2.80
  -5   6  -3    1.00    0.60
  -5   6  -3    1.10    0.60
  -5   6  -3    1.30    0.50
  -5   6  -3    0.60    0.40
   5  -6   3    0.30    0.40
   5  -6   3    0.30    0.40
   5  -6   3    1.20    0.60
   5  -6   3    0.90    0.80
  -6   6  -3   16.00    1.20
  -6   6  -3   15.30    1.40
  -6   6  -3   16.20    1.10
  -6   6  -3   16.60    1.30
   6  -6   3   17.20    1.60
   6  -6   3   18.30    1.40
   6  -6   3   17.10    1.60
   6  -6   3   16.00    1.10
  -7   6  -3  241.48    6.00
  -7   6  -3  231.28    6.10
  -7   6  -3  235.38    6.30
   7  -6   3  234.98    6.50
   7  -6   3  239.88    6.60
   7  -6   3  247.88    6.90
  -8   6  -3   15.10    1.30
  -8   6  -3   13.60    1.20
  -8   6  -3   13.20    1.10
   8  -6   3   17.50    1.90
  -9   6  -3    4.50    0.80
  -9   6  -3    6.30    0.90
  -9   6  -3    3.90    0.70
   9  -6   3    6.40    1.30
 -10   6  -3    1.40    0.60
 -10   6  -3    0.60    0.50
  10  -6   3    0.30    1.00
  12   5  -3    5.40    0.60
  12   5  -3    8.10    1.20
  12   5  -3    7.50    0.80
  12   5  -3    5.40    1.00
  12   5  -3    7.70    0.60
  11   5  -3    0.20    0.50
  11   5  -3    0.90    0.30
  11   5  -3    0.00    0.30
  11   5  -3    0.80    0.50
  11   5  -3    0.40    0.60
  10   5  -3    0.90    0.60
  10   5  -3    0.40    0.50
  10   5  -3    0.70    0.30
  10   5  -3    0.60    0.60
  10   5  -3    0.90    0.30
  10   5  -3    1.10    0.50
   9   5  -3  196.98    5.50
   9   5  -3  191.88    4.30
   9   5  -3  190.18    5.60
   9   5  -3  192.58    4.30
   9   5  -3  196.68    5.10
   9   5  -3  198.98    5.70
   8   5  -3   38.40    1.90
   8   5  -3   34.00    1.90
   8   5  -3   35.30    1.10
   8   5  -3   36.40    1.10
   8   5  -3   34.60    1.60
   8   5  -3   34.30    1.90
   7   5  -3   13.70    0.70
   7   5  -3   14.10    1.30
   7   5  -3   13.70    1.10
   7   5  -3   13.90    0.60
   7   5  -3   14.20    1.20
  -7  -5   3   13.20    1.30
   6   5  -3  147.99    4.30
   6   5  -3  143.79    4.40
   6   5  -3  140.59    4.00
   6   5  -3  147.79    3.40
   6   5  -3  150.78    3.30
  -6  -5   3  146.89    4.40
   5   5  -3    0.60    0.50
   5   5  -3    2.20    0.40
   5   5  -3    1.70    0.30
   5   5  -3    1.00    0.40
   5   5  -3    2.80    0.70
  -5  -5   3    1.70    0.50
   4   5  -3   28.40    1.10
   4   5  -3   27.10    1.40
   4   5  -3   29.60    1.30
   4   5  -3   26.70    1.50
  -4  -5   3   27.10    1.30
  -4  -5   3   27.60    1.50
   3   5  -3  301.97    6.70
   3   5  -3  301.17    7.20
   3   5  -3  297.07    6.60
   3   5  -3  285.97    7.30
   3   5  -3  295.07    6.90
  -3  -5   3  306.27    6.20
  -3  -5   3  309.37    6.20
  -3  -5   3  312.57    7.00
  -3  -5   3  301.17    7.20
   2   5  -3   56.99    2.00
   2   5  -3   51.69    2.00
   2   5  -3   55.69    1.80
   2   5  -3   52.49    1.70
   2   5  -3   55.09    1.80
  -2  -5   3   56.09    1.90
  -2  -5   3   52.99    2.00
  -2  -5   3   58.89    1.60
  -2  -5   3   56.89    1.60
   1   5  -3  285.57    7.10
   1   5  -3  298.47    7.00
   1   5  -3  317.97    7.20
   1   5  -3  298.27    7.00
   1   5  -3  307.17    7.40
  -1  -5   3  311.27    7.00
  -1  -5   3  315.47    7.10
  -1  -5   3  308.87    6.90
  -1  -5   3  362.86    8.00
   0   5  -3  724.43   15.50
   0   5  -3  714.83   15.60
   0   5  -3  724.73   15.50
   0   5  -3  759.92   15.50
   0   5  -3  703.93   15.80
   0  -5   3  722.43   15.50
   0  -5   3  736.03   15.50
   0  -5   3  758.72   15.50
  -1   5  -3   38.50    1.30
  -1   5  -3   38.40    1.60
  -1   5  -3   35.90    1.50
  -1   5  -3   36.90    1.60
   1  -5   3   37.80    1.60
   1  -5   3   37.00    1.50
   1  -5   3   39.50    1.70
   1  -5   3   40.80    1.50
   1  -5   3   36.60    1.40
  -2   5  -3  815.82   17.30
  -2   5  -3  819.12   17.10
  -2   5  -3  787.42   17.10
  -2   5  -3  813.92   17.00
  -2   5  -3  768.42   17.00
   2  -5   3  789.82   17.30
   2  -5   3  805.82   17.10
   2  -5   3  798.02   17.10
   2  -5   3  794.32   17.10
   2  -5   3  821.62   16.70
  -3   5  -3    1.70    0.50
  -3   5  -3    2.00    0.50
  -3   5  -3    2.30    0.60
  -3   5  -3    2.00    0.60
   3  -5   3    2.40    0.50
   3  -5   3    2.40    0.70
   3  -5   3    2.50    0.60
   3  -5   3    2.80    0.40
   3  -5   3    2.30    0.50
  -4   5  -3   35.40    1.60
  -4   5  -3   33.30    1.50
  -4   5  -3   34.60    1.40
  -4   5  -3   32.10    1.70
   4  -5   3   36.30    1.60
   4  -5   3   34.10    1.60
   4  -5   3   33.80    1.40
   4  -5   3   30.60    1.80
  -5   5  -3   20.70    1.40
  -5   5  -3   20.00    1.00
  -5   5  -3   20.90    1.30
  -5   5  -3   20.70    1.20
   5  -5   3   20.40    1.10
   5  -5   3   19.50    1.30
   5  -5   3   20.00    1.30
   5  -5   3   20.20    1.60
  -6   5  -3  130.59    3.70
  -6   5  -3  129.69    3.30
  -6   5  -3  126.29    3.90
  -6   5  -3  131.59    3.70
   6  -5   3  130.19    3.40
   6  -5   3  119.99    3.90
   6  -5   3  129.99    4.00
   6  -5   3  139.59    4.30
  -7   5  -3    4.40    0.70
  -7   5  -3    4.60    0.80
  -7   5  -3    3.30    0.80
   7  -5   3    3.90    1.00
   7  -5   3    4.80    0.90
   7  -5   3    4.00    0.90
  -8   5  -3   34.70    1.70
  -8   5  -3   34.50    1.70
   8  -5   3   32.80    2.20
   8  -5   3   35.50    1.90
   8  -5   3   35.90    2.00
  -9   5  -3    4.00    0.80
  -9   5  -3    3.90    0.70
   9  -5   3    4.10    1.20
 -10   5  -3    4.10    0.60
 -10   5  -3    4.10    0.60
 -10   5  -3    3.30    0.60
  10  -5   3    4.40    1.30
  11  -5   3    2.40    1.20
  12   4  -3    3.60    1.00
  12   4  -3    2.10    0.70
  12   4  -3    3.80    0.50
  12   4  -3    2.10    0.50
  11   4  -3   22.90    1.00
  11   4  -3   26.80    1.90
  11   4  -3   23.20    1.10
  11   4  -3   24.50    1.60
  11   4  -3   23.00    1.70
  10   4  -3    7.40    1.10
  10   4  -3    5.90    0.70
  10   4  -3    5.60    1.00
  10   4  -3    5.60    1.00
  10   4  -3    5.00    0.60
  10   4  -3    4.80    0.50
   9   4  -3    1.40    0.70
   9   4  -3    0.90    0.60
   9   4  -3    1.20    0.60
   9   4  -3    0.60    0.40
   9   4  -3    0.20    0.30
   9   4  -3    0.60    0.30
   8   4  -3  116.69    3.80
   8   4  -3  116.79    2.80
   8   4  -3  116.29    2.80
   8   4  -3  115.79    3.30
   8   4  -3  120.89    3.80
   8   4  -3  112.79    3.70
  -8  -4   3  118.49    3.80
   7   4  -3   15.10    1.20
   7   4  -3   15.70    0.60
   7   4  -3   15.50    1.00
   7   4  -3   14.60    0.70
   7   4  -3   15.10    1.20
  -7  -4   3   14.00    1.20
   6   4  -3   56.99    2.20
   6   4  -3   59.39    1.60
   6   4  -3   61.89    2.30
   6   4  -3   60.09    1.50
  -6  -4   3   59.89    2.30
   5   4  -3   22.60    1.30
   5   4  -3   21.10    1.20
   5   4  -3   22.30    0.70
   5   4  -3   22.00    0.80
  -5  -4   3   20.90    1.30
   4   4  -3    9.60    0.50
   4   4  -3    9.50    0.80
   4   4  -3    8.10    0.80
   4   4  -3    9.90    0.60
  -4  -4   3    9.50    0.90
   3   4  -3  549.85   12.40
   3   4  -3  576.04   12.00
   3   4  -3  586.64   12.10
   3   4  -3  576.64   12.60
  -3  -4   3  566.34   12.60
  -3  -4   3  600.14   12.40
   2   4  -3  143.49    3.50
   2   4  -3  141.29    3.70
   2   4  -3  139.19    3.60
   2   4  -3  139.39    4.20
   2   4  -3  139.69    3.40
  -2  -4   3  147.79    3.20
  -2  -4   3  157.58    4.00
  -2  -4   3  146.19    3.30
  -2  -4   3  145.59    3.60
   1   4  -3   24.20    1.10
   1   4  -3   23.70    1.10
   1   4  -3   25.00    1.10
   1   4  -3   26.10    1.00
  -1  -4   3   24.90    1.00
  -1  -4   3   26.00    1.00
  -1  -4   3   25.30    1.20
  -1  -4   3   26.40    1.10
   0   4  -3    4.10    0.50
   0   4  -3    5.60    0.60
   0   4  -3    4.30    0.50
   0   4  -3    3.80    0.60
   0   4  -3    3.70    0.50
   0  -4   3    5.30    0.60
   0  -4   3    5.40    0.60
   0  -4   3    4.50    0.60
   0  -4   3    4.30    0.50
  -1   4  -3  106.69    2.60
  -1   4  -3  102.59    2.90
  -1   4  -3   97.09    2.70
  -1   4  -3  103.49    2.80
  -1   4  -3   98.09    2.70
   1  -4   3  106.09    2.80
   1  -4   3   92.19    2.70
   1  -4   3  103.19    2.60
   1  -4   3  102.19    2.90
  -2   4  -3    7.10    0.70
  -2   4  -3    6.80    0.70
  -2   4  -3    7.40    0.70
  -2   4  -3    7.90    0.90
  -2   4  -3    6.60    0.70
   2  -4   3    6.70    0.50
   2  -4   3    6.80    0.70
   2  -4   3    7.50    0.90
   2  -4   3    6.70    0.70
  -3   4  -3  178.48    4.50
  -3   4  -3  180.08    4.50
  -3   4  -3  190.78    4.30
  -3   4  -3  182.38    4.70
   3  -4   3  174.98    4.50
   3  -4   3  183.28    4.00
   3  -4   3  175.38    4.70
   3  -4   3  187.18    4.40
   3  -4   3  171.28    4.50
  -4   4  -3  226.18    5.50
  -4   4  -3  229.68    5.20
  -4   4  -3  223.48    5.60
  -4   4  -3  227.08    5.40
   4  -4   3  220.68    5.60
   4  -4   3  227.48    5.20
   4  -4   3  228.58    5.70
   4  -4   3  222.18    5.80
  -5   4  -3   36.60    1.50
  -5   4  -3   34.50    1.70
  -5   4  -3   35.40    1.50
  -5   4  -3   36.10    1.20
   5  -4   3   36.50    1.30
   5  -4   3   37.40    1.80
   5  -4   3   33.50    1.60
   5  -4   3   34.60    1.60
  -6   4  -3  101.89    2.90
  -6   4  -3  101.49    3.00
  -6   4  -3   99.09    3.10
  -6   4  -3   96.09    2.50
   6  -4   3   93.69    3.10
   6  -4   3   97.39    3.40
   6  -4   3  102.49    2.60
   6  -4   3  103.29    3.30
  -7   4  -3    9.40    0.90
  -7   4  -3   11.50    1.10
  -7   4  -3   11.90    1.00
   7  -4   3   10.60    1.10
   7  -4   3   10.10    1.30
   7  -4   3   11.20    1.10
  -8   4  -3   48.90    1.80
  -8   4  -3   47.50    1.90
  -8   4  -3   48.40    1.90
   8  -4   3   52.89    2.50
   8  -4   3   49.20    2.20
  -9   4  -3   14.70    1.00
  -9   4  -3   14.90    1.00
  -9   4  -3   15.00    1.00
   9  -4   3    9.80    1.60
   9  -4   3   14.50    1.60
   9  -4   3   14.30    1.40
 -10   4  -3    8.60    0.80
  10  -4   3   10.10    1.50
  11  -4   3   16.40    1.90
  12   3  -3   -0.40    0.40
  12   3  -3    1.90    0.50
  12   3  -3   -0.80    0.60
  12   3  -3    1.00    0.50
  11   3  -3    5.10    0.90
  11   3  -3    4.00    0.60
  11   3  -3    3.60    0.60
  11   3  -3    3.00    0.90
  10   3  -3   21.80    1.60
  10   3  -3   22.70    1.00
  10   3  -3   22.90    1.00
  10   3  -3   21.70    1.70
  10   3  -3   21.20    1.50
  10   3  -3   23.40    1.20
   9   3  -3   21.60    1.00
   9   3  -3   22.90    1.00
   9   3  -3   21.60    1.50
   9   3  -3   19.70    1.50
   9   3  -3   21.60    1.00
   8   3  -3   10.70    0.80
   8   3  -3   11.70    1.30
   8   3  -3   10.10    0.70
   8   3  -3   10.50    0.70
   8   3  -3   10.70    1.10
  -8  -3   3   10.50    1.10
   7   3  -3   73.29    2.70
   7   3  -3   77.69    2.70
   7   3  -3   78.29    2.00
   7   3  -3   77.89    2.30
   7   3  -3   77.69    2.00
  -7  -3   3   77.49    2.80
   6   3  -3  362.86    7.50
   6   3  -3  352.66    8.30
   6   3  -3  360.86    7.50
   6   3  -3  343.27    8.70
   6   3  -3  366.36    7.90
  -6  -3   3  350.36    8.40
   5   3  -3   59.69    2.20
   5   3  -3   58.59    2.10
   5   3  -3   63.79    1.60
   5   3  -3   65.69    1.60
  -5  -3   3   62.09    2.20
   4   3  -3   -0.10    0.20
   4   3  -3    0.10    0.30
   4   3  -3    0.00    0.20
   4   3  -3    0.10    0.30
  -4  -3   3    0.20    0.40
   3   3  -3  268.87    6.40
   3   3  -3  292.97    6.00
   3   3  -3  289.77    6.10
   3   3  -3  277.97    6.50
  -3  -3   3  296.37    6.50
  -3  -3   3  262.97    6.80
   2   3  -3  259.67    5.60
   2   3  -3  260.27    6.00
   2   3  -3  261.37    5.70
   2   3  -3  252.37    5.90
  -2  -3   3  262.27    5.90
  -2  -3   3  260.27    6.00
  -2  -3   3  263.87    5.50
  -2  -3   3  266.17    5.50
   1   3  -3  155.08    3.70
   1   3  -3  153.98    3.60
   1   3  -3  147.39    3.70
  -1  -3   3  151.88    3.80
  -1  -3   3  157.98    3.50
  -1  -3   3  153.88    3.70
  -1  -3   3  152.48    3.60
   0   3  -3  182.38    4.50
   0   3  -3  192.98    4.30
   0   3  -3  177.98    4.40
   0   3  -3  180.88    4.30
   0   3  -3  187.98    4.30
   0  -3   3  186.58    4.30
   0  -3   3  189.38    4.30
   0  -3   3  185.98    4.40
   0  -3   3  189.18    4.30
  -1   3  -3    2.40    0.40
  -1   3  -3    1.60    0.30
  -1   3  -3    1.80    0.40
  -1   3  -3    2.30    0.50
  -1   3  -3    1.30    0.40
   1  -3   3    2.40    0.40
   1  -3   3    1.70    0.40
   1  -3   3    2.00    0.40
   1  -3   3    2.20    0.40
  -2   3  -3    1.80    0.40
  -2   3  -3    1.30    0.40
  -2   3  -3    2.00    0.30
  -2   3  -3    2.10    0.50
  -2   3  -3    1.70    0.40
   2  -3   3    1.30    0.50
   2  -3   3    1.40    0.30
   2  -3   3    2.20    0.50
   2  -3   3    1.60    0.30
  -3   3  -3  455.05    9.90
  -3   3  -3  461.95    9.60
  -3   3  -3  464.25   10.10
  -3   3  -3  468.45    9.90
   3  -3   3  436.06    9.90
   3  -3   3  466.15    9.50
   3  -3   3  435.06    9.90
   3  -3   3  456.35   10.80
  -4   3  -3   -0.10    0.40
  -4   3  -3   -0.20    0.30
  -4   3  -3    0.20    0.20
  -4   3  -3    0.20    0.30
   4  -3   3    0.20    0.40
   4  -3   3   -0.40    0.40
   4  -3   3    0.00    0.20
   4  -3   3    0.00    0.20
   4  -3   3    0.00    0.30
  -5   3  -3    2.80    0.60
  -5   3  -3    2.30    0.50
  -5   3  -3    2.90    0.40
  -5   3  -3    2.90    0.50
   5  -3   3    1.90    0.50
   5  -3   3    2.20    0.60
   5  -3   3    2.00    0.50
  -6   3  -3   37.10    1.60
  -6   3  -3   42.40    1.60
  -6   3  -3   42.00    1.60
   6  -3   3   41.70    1.70
   6  -3   3   41.30    1.90
   6  -3   3   42.10    1.80
  -7   3  -3   14.90    1.00
  -7   3  -3   13.70    1.00
  -7   3  -3   13.40    1.00
   7  -3   3   15.00    1.20
   7  -3   3   13.60    1.10
   7  -3   3   12.80    1.30
  -8   3  -3    5.20    0.70
  -8   3  -3    4.80    0.60
  -8   3  -3    5.90    0.70
   8  -3   3    5.40    0.90
   8  -3   3    5.10    1.00
   8  -3   3    4.90    0.90
  -9   3  -3    0.80    0.40
  -9   3  -3    0.00    0.30
  -9   3  -3    0.70    0.30
   9  -3   3    0.40    0.60
   9  -3   3    0.10    0.70
   9  -3   3    0.30    0.50
 -10   3  -3   60.29    2.10
  10  -3   3   60.19    2.90
  10  -3   3   62.99    2.60
 -11   3  -3    0.10    0.30
  11  -3   3   -0.40    0.80
  12  -3   3    1.40    0.90
  12   2  -3    6.20    1.00
  12   2  -3    8.60    1.40
  12   2  -3    8.30    1.00
  12   2  -3    9.80    1.00
  12   2  -3   11.00    0.90
  11   2  -3   22.50    1.50
  11   2  -3   22.80    1.50
  11   2  -3   21.30    1.30
  11   2  -3   21.90    1.20
  11   2  -3   24.60    1.90
  10   2  -3   19.00    1.20
  10   2  -3   18.70    1.40
  10   2  -3   21.50    1.70
  10   2  -3   19.80    1.40
   9   2  -3   12.00    1.40
   9   2  -3   12.10    1.40
   9   2  -3   13.70    0.90
   9   2  -3   11.00    1.10
   8   2  -3   78.69    2.00
   8   2  -3   76.89    2.20
   8   2  -3   74.99    2.20
   8   2  -3   72.79    2.90
   8   2  -3   77.99    2.70
   7   2  -3    0.30    0.50
   7   2  -3    0.30    0.30
   7   2  -3    0.30    0.30
   7   2  -3    0.10    0.30
  -7  -2   3    0.40    0.50
   6   2  -3   24.90    1.40
   6   2  -3   28.60    1.00
   6   2  -3   25.60    1.40
   6   2  -3   26.80    1.00
   6   2  -3   27.10    1.00
  -6  -2   3   29.10    1.40
   5   2  -3    0.30    0.20
   5   2  -3    0.10    0.30
   5   2  -3    0.30    0.40
   5   2  -3    0.20    0.20
  -5  -2   3    0.20    0.40
   4   2  -3    5.50    0.70
   4   2  -3    4.40    0.40
   4   2  -3    4.90    0.70
   4   2  -3    4.80    0.40
  -4  -2   3    4.10    0.70
   3   2  -3  222.58    4.60
   3   2  -3  203.88    5.00
   3   2  -3  218.08    4.70
   3   2  -3  200.98    5.00
  -3  -2   3  221.58    5.10
   2   2  -3   29.20    0.90
   2   2  -3   25.60    1.10
   2   2  -3   28.70    0.90
   2   2  -3   28.20    1.10
  -2  -2   3   28.90    0.80
  -2  -2   3   28.00    1.10
  -2  -2   3   29.00    0.70
  -2  -2   3   28.40    1.20
   1   2  -3  264.87    5.80
   1   2  -3  266.57    5.70
   1   2  -3  255.77    5.90
   1   2  -3  267.27    5.90
  -1  -2   3  276.27    5.70
  -1  -2   3  259.97    5.90
  -1  -2   3  265.67    5.90
  -1  -2   3  276.47    5.70
   0   2  -3  255.17    5.60
   0   2  -3  246.78    5.60
   0   2  -3  241.88    5.50
   0  -2   3  250.77    5.50
   0  -2   3  253.77    5.50
   0  -2   3  254.37    5.40
   1  -2   3  830.92   80.09
  -2   2  -3  158.28    3.50
  -2   2  -3  155.48    3.70
  -2   2  -3  151.18    3.60
  -2   2  -3  156.48    3.70
  -2   2  -3  148.99    3.60
   2  -2   3  151.18    3.60
   2  -2   3  150.68    3.80
   2  -2   3  156.58    3.70
   2  -2   3  150.48    3.70
  -3   2  -3  955.00   19.40
  -3   2  -3  964.30   19.30
   3  -2   3  926.41   19.50
   3  -2   3  917.41   19.30
   3  -2   3  890.41   19.30
  -4   2  -3   33.00    1.30
  -4   2  -3   34.30    1.30
  -4   2  -3   34.00    1.30
  -4   2  -3   35.00    0.90
   4  -2   3   30.70    1.30
   4  -2   3   31.40    1.30
   4  -2   3   32.40    1.30
   4  -2   3   32.00    1.40
  -5   2  -3   20.50    0.90
  -5   2  -3   19.00    1.00
  -5   2  -3   21.00    1.10
   5  -2   3   20.90    1.10
   5  -2   3   19.80    1.00
   5  -2   3   21.00    1.20
   5  -2   3   18.10    1.00
  -6   2  -3   22.40    1.10
  -6   2  -3   22.70    1.00
  -6   2  -3   19.90    1.10
   6  -2   3   22.20    1.10
   6  -2   3   19.90    1.30
   6  -2   3   20.90    1.20
   6  -2   3   21.60    1.10
  -7   2  -3    0.70    0.40
  -7   2  -3    0.80    0.40
  -7   2  -3    0.60    0.40
   7  -2   3    0.60    0.50
   7  -2   3    0.60    0.40
   7  -2   3    1.00    0.50
   7  -2   3   -0.10    0.60
  -8   2  -3   12.70    0.70
  -8   2  -3   12.30    0.90
  -8   2  -3   13.50    0.70
   8  -2   3   12.70    1.00
   8  -2   3   14.40    1.20
   8  -2   3   11.70    1.20
   8  -2   3   12.60    1.10
  -9   2  -3   37.20    1.60
   9  -2   3   40.60    1.90
   9  -2   3   36.80    1.90
   9  -2   3   37.20    2.00
 -10   2  -3   33.30    1.50
  10  -2   3   33.90    1.80
  10  -2   3   33.60    2.00
  10  -2   3   34.60    2.10
  11  -2   3    3.30    0.80
  11  -2   3    3.70    1.00
  12  -2   3   45.20    2.50
  12   1  -3    4.70    0.80
  12   1  -3    5.00    1.10
  12   1  -3    3.80    0.70
  11   1  -3    8.60    1.10
  11   1  -3    7.10    1.00
  11   1  -3   10.50    0.90
  11   1  -3    7.90    1.00
  10   1  -3    0.40    0.40
  10   1  -3    0.70    0.50
  10   1  -3    0.30    0.50
   9   1  -3    0.00    0.40
   9   1  -3    1.00    0.50
   8   1  -3  402.96    8.90
   8   1  -3  405.66    9.00
   7   1  -3   20.80    1.10
   7   1  -3   21.00    1.00
   7   1  -3   20.20    1.20
  -7  -1   3   21.80    1.30
   6   1  -3    7.50    0.80
   6   1  -3    7.70    0.70
   6   1  -3    8.50    0.60
   6   1  -3    7.10    0.40
  -6  -1   3    6.40    0.80
   5   1  -3   76.49    2.00
   5   1  -3   75.19    2.00
   5   1  -3   77.59    1.90
   5   1  -3   72.59    2.30
   4   1  -3    0.20    0.20
   4   1  -3   -0.10    0.20
   4   1  -3    0.10    0.30
  -4  -1   3    0.30    0.30
   3   1  -3  525.15   11.40
   3   1  -3  530.95   11.10
   3   1  -3  533.45   11.00
  -3  -1   3  539.95   11.40
   2   1  -3   14.50    0.60
   2   1  -3   13.70    0.60
   2   1  -3   13.10    0.70
  -2  -1   3   14.40    0.80
  -2  -1   3   14.70    0.50
  -2  -1   3   15.10    0.50
   1   1  -3    6.90    0.50
   1   1  -3    6.80    0.50
   1   1  -3    6.40    0.50
   1   1  -3    7.20    0.50
  -1  -1   3    7.40    0.60
  -1  -1   3    7.50    0.50
  -1  -1   3    6.10    0.40
  -1  -1   3    5.60    0.50
   0   1  -3   17.80    0.80
   0   1  -3   18.40    0.80
   0  -1   3   19.90    0.80
   0  -1   3   19.30    0.80
   0  -1   3   19.00    0.70
   0  -1   3   19.20    0.80
   1  -1   3 1555.34  101.89
  -2   1  -3 1247.08   95.39
  -3   1  -3  123.79    2.60
  -3   1  -3  120.09    2.90
  -3   1  -3  119.59    2.90
  -3   1  -3  116.99    2.80
   3  -1   3  113.19    2.90
   3  -1   3  116.49    3.00
   3  -1   3  117.99    3.00
   3  -1   3  117.19    2.90
  -4   1  -3  178.38    4.20
  -4   1  -3  182.38    4.10
  -4   1  -3  179.98    4.10
   4  -1   3  171.78    4.20
   4  -1   3  169.18    4.10
   4  -1   3  175.78    4.30
   4  -1   3  179.28    4.20
  -5   1  -3  102.89    2.70
  -5   1  -3  104.79    2.60
  -5   1  -3  106.19    2.60
   5  -1   3   97.99    2.80
   5  -1   3  104.09    2.90
   5  -1   3   95.49    2.70
   5  -1   3  104.19    2.80
  -6   1  -3   24.60    1.10
  -6   1  -3   26.00    1.00
  -6   1  -3   25.10    1.00
   6  -1   3   24.70    1.20
   6  -1   3   25.10    0.90
   6  -1   3   24.40    1.10
   6  -1   3   25.50    1.20
   6  -1   3   25.30    1.60
  -7   1  -3    5.60    0.50
  -7   1  -3    5.30    0.50
  -7   1  -3    6.80    0.70
   7  -1   3    5.80    0.50
   7  -1   3    5.50    0.80
   7  -1   3    8.20    1.00
   7  -1   3    7.40    0.80
  -8   1  -3    3.90    0.60
   8  -1   3    3.90    0.70
   8  -1   3    4.20    0.80
   8  -1   3    3.70    0.80
   8  -1   3    4.50    0.50
   8  -1   3    3.70    0.70
  -9   1  -3    6.90    0.80
   9  -1   3    7.00    1.00
   9  -1   3    6.20    0.60
   9  -1   3    5.40    0.80
   9  -1   3    6.10    0.80
   9  -1   3    5.00    0.80
 -10   1  -3    1.60    0.50
  10  -1   3    1.50    0.60
  10  -1   3    1.90    0.50
  10  -1   3    1.50    0.60
  10  -1   3    1.30    0.70
  11  -1   3   11.30    1.40
  11  -1   3   10.10    1.10
  11  -1   3   10.80    1.30
  12  -1   3   -0.40    0.60
  12  -1   3    1.30    0.60
  13  -1   3    1.40    0.80
  11   0  -3   34.20    1.80
  11   0  -3   28.10    1.60
  10   0  -3   16.30    1.30
  10   0  -3   15.00    1.10
  10   0  -3   14.20    1.20
   9   0  -3   38.60    1.70
   9   0  -3   38.80    1.80
   9   0  -3   40.80    1.90
   8   0  -3  167.08    4.40
   8   0  -3  169.98    5.00
   7   0  -3  120.39    3.20
   7   0  -3  121.29    3.30
   7   0  -3  122.69    3.50
  -7   0   3  115.49    3.30
   6   0  -3  109.19    2.90
   6   0  -3  106.79    3.00
   5   0  -3  102.79    2.70
   5   0  -3  101.79    2.70
  -5   0   3  103.39    2.80
   4   0  -3  180.78    4.30
   4   0  -3  181.58    4.20
  -4   0   3  187.98    4.40
   3   0  -3  368.36    8.10
   3   0  -3  376.36    8.10
   3   0  -3  382.26    7.70
  -3   0   3  383.06    7.90
  -3   0   3  384.56    8.20
   2   0  -3  312.17    6.60
   2   0  -3  297.57    6.60
   2   0  -3  310.37    6.40
  -2   0   3  312.77    6.50
  -2   0   3  315.27    6.50
  -2   0   3  306.57    6.70
   1   0  -3   51.59    1.40
   1   0  -3   51.29    1.40
   1   0  -3   47.30    1.40
  -1   0   3   51.19    1.30
  -1   0   3   48.10    1.40
  -1   0   3   48.70    1.30
   0   0  -3  964.30   70.79
   0   0   3  946.61   69.19
   1   0   3 3409.76  145.09
   2   0   3 1691.03  100.29
   3   0   3  779.92   16.10
  -4   0  -3  804.92   16.90
  -4   0  -3  833.42   16.70
   4   0   3  809.52   16.90
   4   0   3  804.02   16.80
   4   0   3  804.62   16.70
  -5   0  -3  492.95    9.90
  -5   0  -3  487.55    9.90
  -5   0  -3  481.45   10.30
   5   0   3  464.45   10.20
   5   0   3  471.95   10.30
   5   0   3  466.65   10.10
   5   0   3  469.85   10.20
  -6   0  -3   49.30    1.70
  -6   0  -3   48.60    1.20
   6   0   3   49.30    1.70
   6   0   3   47.50    1.60
   6   0   3   46.20    1.70
  -7   0  -3  139.09    3.60
   7   0   3  133.49    3.50
   7   0   3  139.79    3.50
   7   0   3  138.39    3.70
  -8   0  -3    3.50    0.60
   8   0   3    3.90    0.60
   8   0   3    4.10    0.70
   8   0   3    3.40    0.60
   8   0   3    4.60    0.70
  -9   0  -3   76.39    2.50
   9   0   3   82.19    2.70
   9   0   3   83.79    2.60
   9   0   3   77.39    2.40
 -10   0  -3  121.09    3.40
  10   0   3  119.69    3.70
  10   0   3  121.29    3.30
  10   0   3  119.19    3.80
  10   0   3  121.79    3.50
  10   0   3  120.79    3.50
  11   0   3    7.70    0.90
  11   0   3    6.40    0.80
  11   0   3    6.40    0.70
  11   0   3    7.00    1.10
  11   0   3    5.80    1.10
  12   0   3    2.60    0.80
  12   0   3    2.90    0.70
  12   0   3    2.60    0.60
  12   0   3    3.00    0.60
  13   0   3    0.10    0.60
  11  -1  -3    2.70    0.90
  11  -1  -3    2.10    0.80
  10  -1  -3    0.80    0.60
  10  -1  -3    2.60    0.60
  10  -1  -3   -0.50    0.60
   9  -1  -3  205.48    5.40
   9  -1  -3  205.08    5.50
   9  -1  -3  209.08    5.40
   8  -1  -3  160.68    4.50
   8  -1  -3  162.28    4.30
   7  -1  -3   68.39    2.40
   7  -1  -3   71.59    2.60
   7  -1  -3   74.89    2.50
  -7   1   3   72.09    2.20
   6  -1  -3  287.97    6.70
   6  -1  -3  296.37    6.90
   6  -1  -3  297.37    6.90
  -6   1   3  283.97    6.60
   5  -1  -3   32.80    1.50
   5  -1  -3   32.60    1.30
  -5   1   3   32.60    1.30
  -5   1   3   34.90    1.00
   4  -1  -3   42.50    1.50
   4  -1  -3   45.60    1.70
   4  -1  -3   47.50    1.60
  -4   1   3   44.00    1.30
  -4   1   3   44.80    1.30
  -4   1   3   45.30    1.50
   3  -1  -3  697.63   14.60
   3  -1  -3  674.13   14.50
   3  -1  -3  663.53   14.70
  -3   1   3  706.43   14.50
  -3   1   3  721.53   14.40
  -3   1   3  714.83   14.50
   2  -1  -3   11.80    0.70
   2  -1  -3   12.80    0.70
   2  -1  -3   12.00    0.80
  -2   1   3   11.90    0.60
  -2   1   3   12.90    0.70
  -2   1   3   12.00    0.60
   1  -1  -3   10.90    0.60
   1  -1  -3    9.80    0.60
   1  -1  -3   10.80    0.40
   1  -1  -3   10.40    0.70
  -1   1   3   10.40    0.60
  -1   1   3   11.60    0.60
  -1   1   3   10.60    0.40
   0  -1  -3 2482.95  122.69
   0   1   3 1972.10  112.49
  -1  -1  -3 1203.18   93.89
   1   1   3 1421.36  105.69
  -2  -1  -3  130.89    3.00
  -2  -1  -3  131.89    2.80
  -2  -1  -3  132.59    3.00
  -2  -1  -3  132.59    3.00
  -2  -1  -3  134.09    3.10
   2   1   3  130.89    3.00
   2   1   3  126.29    3.00
   2   1   3  126.49    3.00
   2   1   3  128.49    2.80
   2   1   3  133.99    3.10
  -3  -1  -3   85.99    2.20
  -3  -1  -3   86.99    2.10
  -3  -1  -3   83.99    2.00
  -3  -1  -3   85.39    2.00
   3   1   3   78.99    1.90
   3   1   3   83.49    2.10
   3   1   3   81.79    2.20
   3   1   3   85.09    2.10
   3   1   3   83.29    2.00
  -4  -1  -3  137.09    2.90
  -4  -1  -3  132.59    2.90
  -4  -1  -3  131.69    3.30
   4   1   3  133.69    3.00
   4   1   3  133.09    2.90
   4   1   3  133.39    3.10
   4   1   3  128.39    3.10
   4   1   3  131.79    3.30
  -5  -1  -3   71.19    2.10
   5   1   3   69.79    2.10
   5   1   3   71.39    1.90
   5   1   3   69.09    1.80
  -6  -1  -3   21.70    1.10
   6   1   3   19.80    1.10
   6   1   3   19.10    0.90
   6   1   3   21.50    0.90
  -7  -1  -3    0.40    0.40
   7   1   3    0.40    0.40
   7   1   3    0.70    0.40
   7   1   3    0.80    0.30
   7   1   3    0.70    0.40
  -8  -1  -3   -0.60    0.30
   8   1   3    0.20    0.30
   8   1   3    0.00    0.40
   8   1   3    0.40    0.40
   8   1   3    0.40    0.40
  -9  -1  -3   45.00    1.80
   9   1   3   45.30    1.80
   9   1   3   45.60    1.80
   9   1   3   45.90    1.70
   9   1   3   49.00    1.90
  10   1   3   98.79    3.00
  10   1   3   95.89    3.00
  10   1   3   98.99    3.10
  11   1   3   12.70    1.00
  11   1   3   11.50    1.20
  11   1   3   11.60    1.00
  11   1   3   10.90    1.10
  12   1   3    2.40    0.70
  12   1   3    1.80    0.70
  12   1   3    2.80    0.60
  12   1   3    2.30    0.80
  12   1   3    3.40    0.80
  13   1   3   17.00    1.70
  13   1   3   13.90    1.10
  13   1   3   17.00    1.40
  11  -2  -3   70.89    3.10
  10  -2  -3  119.39    4.00
  10  -2  -3  111.19    3.50
  10  -2  -3  117.49    3.80
   9  -2  -3    2.60    0.70
   9  -2  -3    1.60    0.60
   9  -2  -3    3.50    0.90
   8  -2  -3    6.60    1.00
   8  -2  -3    5.70    0.80
   8  -2  -3    5.70    0.90
   7  -2  -3   79.99    2.70
   7  -2  -3   78.79    2.80
   7  -2  -3   87.69    2.80
   6  -2  -3  135.29    3.70
   6  -2  -3  134.89    3.80
   6  -2  -3  127.79    3.60
  -6   2   3  131.69    3.10
  -6   2   3  128.69    3.10
  -6   2   3  129.99    3.30
   5  -2  -3    8.00    0.90
   5  -2  -3    8.80    0.80
   5  -2  -3    9.90    0.90
  -5   2   3    8.90    0.70
  -5   2   3    8.20    0.60
  -5   2   3    8.80    0.60
   4  -2  -3    8.20    0.70
   4  -2  -3    7.70    0.80
   4  -2  -3    7.70    0.80
  -4   2   3    8.20    0.70
  -4   2   3    9.00    0.60
  -4   2   3    8.60    0.70
   3  -2  -3    3.50    0.60
   3  -2  -3    3.20    0.50
   3  -2  -3    4.80    0.60
  -3   2   3    3.80    0.40
  -3   2   3    3.90    0.50
  -3   2   3    4.30    0.50
   2  -2  -3   66.69    2.00
   2  -2  -3   66.49    2.00
   2  -2  -3   65.29    2.10
  -2   2   3   73.49    2.00
  -2   2   3   73.99    1.60
  -2   2   3   69.79    2.00
   1  -2  -3  322.67    7.20
   1  -2  -3  330.17    7.20
   1  -2  -3  310.07    7.10
  -1   2   3  328.77    7.10
  -1   2   3  314.17    7.20
  -1   2   3  342.27    6.90
  -1   2   3  343.67    7.20
   0  -2  -3   22.10    0.90
   0  -2  -3   21.80    0.80
   0  -2  -3   21.50    1.00
   0   2   3   23.30    0.80
   0   2   3   21.00    1.00
  -1  -2  -3    1.30    0.40
  -1  -2  -3    1.30    0.30
  -1  -2  -3    0.30    0.30
  -1  -2  -3    0.40    0.30
   1   2   3    0.50    0.30
   1   2   3    0.80    0.30
   1   2   3    0.50    0.30
   1   2   3    0.70    0.30
  -2  -2  -3  450.95    9.50
  -2  -2  -3  449.46    9.30
   2   2   3  441.36    9.30
   2   2   3  436.76    9.50
  -3  -2  -3   73.09    1.80
  -3  -2  -3   76.39    1.90
  -3  -2  -3   74.99    2.10
  -3  -2  -3   73.99    1.80
   3   2   3   71.99    1.80
   3   2   3   73.09    1.90
   3   2   3   74.89    1.90
   3   2   3   71.59    2.10
  -4  -2  -3  254.27    5.20
  -4  -2  -3  259.47    5.50
  -4  -2  -3  250.37    5.70
  -4  -2  -3  248.88    5.20
   4   2   3  243.08    5.40
   4   2   3  252.77    5.40
   4   2   3  241.48    5.70
   4   2   3  247.38    5.40
   4   2   3  251.57    5.20
  -5  -2  -3  175.58    4.30
  -5  -2  -3  176.18    3.90
   5   2   3  172.08    3.80
   5   2   3  171.18    3.80
   5   2   3  165.08    3.80
   5   2   3  167.08    4.20
  -6  -2  -3   47.50    1.70
   6   2   3   47.20    1.30
   6   2   3   44.10    1.90
   6   2   3   47.60    1.40
   6   2   3   47.10    1.40
  -7  -2  -3   62.49    2.10
   7   2   3   62.49    1.70
   7   2   3   60.59    2.10
   7   2   3   62.19    1.80
   7   2   3   61.49    2.10
   7   2   3   63.29    1.60
  -8  -2  -3   33.50    1.50
   8   2   3   32.10    1.50
   8   2   3   34.00    1.60
   8   2   3   33.40    1.00
   8   2   3   32.70    1.30
   8   2   3   32.90    1.20
   9   2   3  141.59    3.70
   9   2   3  137.19    3.50
   9   2   3  139.09    3.90
   9   2   3  141.79    3.90
  10   2   3    1.70    0.60
  10   2   3    1.70    0.50
  10   2   3    1.80    0.60
  10   2   3    3.00    0.70
  11   2   3    0.20    0.40
  11   2   3    0.70    0.50
  11   2   3    0.20    0.60
  11   2   3    0.60    0.50
  12   2   3   17.10    1.30
  12   2   3   17.20    1.30
  12   2   3   17.10    1.30
  12   2   3   15.80    1.10
  13   2   3   40.70    1.80
  13   2   3   37.40    1.70
  13   2   3   41.30    2.00
  13   2   3   41.70    1.90
  10  -3  -3   18.80    1.30
  10  -3  -3   22.50    1.80
   9  -3  -3   32.80    1.90
   9  -3  -3   28.10    1.60
   9  -3  -3   34.00    2.10
   8  -3  -3   26.40    1.60
   8  -3  -3   25.60    1.50
   8  -3  -3   27.40    1.80
   7  -3  -3   21.00    1.40
   7  -3  -3   22.10    1.50
   7  -3  -3   24.40    1.50
  -7   3   3   20.40    0.90
  -7   3   3   21.40    0.90
   6  -3  -3    2.90    0.70
   6  -3  -3    2.20    0.70
   6  -3  -3    2.10    0.60
  -6   3   3    2.70    0.50
  -6   3   3    2.80    0.60
   5  -3  -3   27.20    1.50
   5  -3  -3   29.00    1.40
   5  -3  -3   32.00    1.50
  -5   3   3   28.50    1.00
  -5   3   3   30.10    1.30
  -5   3   3   29.00    1.40
   4  -3  -3    0.40    0.40
   4  -3  -3   -0.10    0.40
   4  -3  -3    0.30    0.40
  -4   3   3   -0.10    0.30
  -4   3   3    0.00    0.40
  -4   3   3   -0.30    0.20
   3  -3  -3    2.30    0.50
   3  -3  -3    2.20    0.50
   3  -3  -3    2.90    0.60
  -3   3   3    3.90    0.40
  -3   3   3    4.10    0.60
   2  -3  -3   39.40    1.50
   2  -3  -3   37.10    1.50
  -2   3   3   39.30    1.40
  -2   3   3   40.20    1.50
  -2   3   3   41.80    1.10
  -2   3   3   38.20    1.50
   1  -3  -3  465.65   10.20
   1  -3  -3  467.95   10.30
   1  -3  -3  461.75   10.30
  -1   3   3  480.95   10.30
  -1   3   3  475.95   10.30
  -1   3   3  470.85   10.20
  -1   3   3  496.75    9.90
   0  -3  -3   75.39    2.10
   0  -3  -3   74.99    2.20
   0   3   3   78.89    2.00
   0   3   3   77.49    2.10
   0   3   3   79.09    2.20
  -1  -3  -3   21.30    0.90
  -1  -3  -3   20.90    1.00
   1   3   3   19.70    0.90
   1   3   3   21.00    1.00
   1   3   3   19.40    0.90
   1   3   3   21.30    0.90
  -2  -3  -3  142.29    3.30
  -2  -3  -3  143.19    3.40
  -2  -3  -3  140.79    3.30
   2   3   3  139.79    3.40
   2   3   3  138.49    3.30
   2   3   3  137.19    3.30
   2   3   3  141.59    3.50
  -3  -3  -3    3.90    0.40
  -3  -3  -3    3.50    0.40
  -3  -3  -3    2.70    0.50
  -3  -3  -3    2.60    0.40
   3   3   3    4.40    0.40
   3   3   3    2.70    0.40
   3   3   3    3.60    0.50
  -4  -3  -3  151.48    3.80
  -4  -3  -3  155.58    3.20
  -4  -3  -3  151.98    3.20
  -4  -3  -3  151.28    3.60
   4   3   3  148.59    3.60
   4   3   3  149.29    3.80
   4   3   3  147.69    3.40
   4   3   3  152.28    3.40
  -5  -3  -3  566.34   11.80
  -5  -3  -3  573.44   12.10
   5   3   3  542.95   12.10
   5   3   3  552.84   11.50
   5   3   3  559.44   11.40
   5   3   3  557.24   11.50
   5   3   3  549.15   11.80
  -6  -3  -3   96.59    2.80
   6   3   3   96.39    2.50
   6   3   3   94.59    2.30
   6   3   3   89.39    2.80
   6   3   3   92.99    2.30
   7   3   3    4.40    0.60
   7   3   3    6.30    0.50
   7   3   3    6.20    0.50
   7   3   3    4.60    0.70
   7   3   3    6.10    0.50
   8   3   3   15.10    0.70
   8   3   3   13.10    1.10
   8   3   3   13.60    0.80
   8   3   3   12.90    0.80
   8   3   3   14.60    1.10
   9   3   3  130.29    3.70
   9   3   3  127.69    3.10
   9   3   3  125.49    3.20
   9   3   3  122.29    3.70
   9   3   3  122.69    3.10
  10   3   3    0.50    0.50
  10   3   3    0.10    0.50
  10   3   3    0.50    0.30
  10   3   3   -0.20    0.40
  10   3   3    0.30    0.30
  11   3   3    9.40    1.10
  11   3   3    9.30    0.90
  11   3   3    9.70    0.70
  11   3   3   10.00    1.10
  12   3   3    8.80    1.10
  12   3   3    7.30    0.80
  12   3   3    6.40    0.90
  12   3   3    8.30    0.90
  13   3   3   36.10    1.90
  13   3   3   35.60    1.80
  13   3   3   34.30    1.90
  13   3   3   35.60    1.50
  13   3   3   33.00    1.90
  13   3   3   33.50    1.70
  10  -4  -3   15.90    1.30
  10  -4  -3   18.50    1.80
   9  -4  -3    0.70    0.80
   9  -4  -3   -0.10    0.50
   8  -4  -3    3.80    0.80
   8  -4  -3    4.50    1.00
   8  -4  -3    5.30    0.90
   7  -4  -3   22.50    1.70
   7  -4  -3   23.60    1.50
   7  -4  -3   22.70    1.60
  -7   4   3   22.30    1.20
  -7   4   3   23.60    1.20
   6  -4  -3  184.08    5.20
   6  -4  -3  181.48    4.90
   6  -4  -3  175.48    4.90
  -6   4   3  181.28    4.70
  -6   4   3  176.78    4.50
   5  -4  -3   92.99    2.90
   5  -4  -3   87.49    2.90
   5  -4  -3   85.39    3.00
  -5   4   3   82.09    2.70
  -5   4   3   85.79    2.60
   4  -4  -3   41.30    1.80
   4  -4  -3   40.80    1.70
   4  -4  -3   38.90    1.80
  -4   4   3   40.70    1.20
  -4   4   3   40.20    1.60
  -4   4   3   42.00    1.80
   3  -4  -3    5.10    0.70
   3  -4  -3    3.90    0.70
   3  -4  -3    4.40    0.70
  -3   4   3    4.00    0.60
  -3   4   3    5.30    0.70
  -3   4   3    5.30    0.40
  -3   4   3    6.00    0.80
   2  -4  -3  252.67    6.20
   2  -4  -3  242.68    6.10
   2  -4  -3  255.57    6.20
  -2   4   3  267.47    6.20
  -2   4   3  269.97    6.10
  -2   4   3  267.07    5.70
  -2   4   3  271.97    6.30
   1  -4  -3   14.50    1.00
   1  -4  -3   16.00    1.00
   1  -4  -3   15.80    1.00
  -1   4   3   17.10    1.00
  -1   4   3   18.20    0.80
  -1   4   3   18.90    1.10
   0  -4  -3 1906.31  156.78
  -1  -4  -3  215.58    5.10
  -1  -4  -3  213.68    4.90
  -1  -4  -3  211.78    4.90
   1   4   3  207.98    5.10
   1   4   3  204.08    5.00
   1   4   3  217.38    5.00
   1   4   3  214.48    4.90
  -2  -4  -3  229.68    5.50
  -2  -4  -3  238.58    5.30
  -2  -4  -3  242.38    5.10
  -2  -4  -3  238.18    5.30
   2   4   3  240.28    5.50
   2   4   3  228.78    5.30
   2   4   3  232.28    5.30
   2   4   3  229.18    5.50
  -3  -4  -3   30.50    1.00
  -3  -4  -3   28.70    1.00
  -3  -4  -3   29.30    1.20
  -3  -4  -3   29.40    0.80
   3   4   3   29.10    1.10
   3   4   3   28.10    1.10
   3   4   3   29.10    1.20
  -4  -4  -3   20.00    1.00
  -4  -4  -3   19.60    0.70
  -4  -4  -3   20.40    0.80
   4   4   3   20.00    1.30
   4   4   3   18.20    0.80
   4   4   3   19.40    0.80
   4   4   3   17.90    1.00
  -5  -4  -3  759.22   15.80
   5   4   3  739.63   16.00
   5   4   3  747.43   15.80
   5   4   3  757.02   15.40
   5   4   3  739.83   15.40
   5   4   3  742.83   15.20
  -6  -4  -3   89.29    2.60
   6   4   3   88.29    2.20
   6   4   3   88.89    2.50
   6   4   3   84.89    2.70
   6   4   3   91.09    2.20
   6   4   3   89.19    2.10
   7   4   3  258.07    6.50
   7   4   3  252.27    6.40
   7   4   3  261.77    5.70
   7   4   3  255.47    5.60
   7   4   3  265.67    5.70
   7   4   3  266.77    6.10
   8   4   3   68.99    2.00
   8   4   3   68.89    1.80
   8   4   3   69.79    1.90
   8   4   3   67.29    2.50
   8   4   3   71.29    2.60
   8   4   3   69.29    2.20
   9   4   3    2.90    0.80
   9   4   3    2.70    0.50
   9   4   3    2.90    0.50
   9   4   3    2.60    0.60
   9   4   3    3.30    0.50
  10   4   3    0.60    0.40
  10   4   3    0.20    0.40
  10   4   3    0.70    0.60
  10   4   3    0.50    0.40
  10   4   3    1.10    0.60
  11   4   3    6.00    0.90
  11   4   3    6.50    0.70
  11   4   3    5.00    0.60
  11   4   3    5.00    0.80
  11   4   3    6.90    1.10
  12   4   3    2.50    0.60
  12   4   3    2.70    0.70
  12   4   3    3.70    0.90
  12   4   3    3.40    0.80
  13   4   3    7.40    1.00
  13   4   3    7.50    0.80
  13   4   3    7.00    0.80
  13   4   3    5.30    0.90
  13   4   3    4.90    0.90
  14   4   3   -1.30    0.80
  14   4   3    0.50    0.50
  14   4   3    0.50    0.50
  14   4   3    0.10    0.50
   9  -5  -3    0.10    0.50
   9  -5  -3    1.20    0.80
   8  -5  -3   57.09    2.40
   8  -5  -3   61.69    2.90
  -8   5   3   56.19    1.90
  -8   5   3   56.99    1.90
   7  -5  -3    0.00    0.50
   7  -5  -3    0.30    0.70
   7  -5  -3    0.90    0.60
  -7   5   3    0.20    0.60
  -7   5   3    0.30    0.50
   6  -5  -3   15.70    1.30
   6  -5  -3   16.50    1.30
   6  -5  -3   19.90    1.60
  -6   5   3   18.50    1.30
  -6   5   3   19.10    1.20
   5  -5  -3   40.60    2.10
   5  -5  -3   41.50    2.00
   5  -5  -3   43.10    1.90
  -5   5   3   39.70    1.90
  -5   5   3   43.90    1.80
   4  -5  -3  749.82   16.70
   4  -5  -3  764.32   16.50
   4  -5  -3  757.72   17.00
  -4   5   3  762.42   15.60
  -4   5   3  730.03   16.40
  -4   5   3  762.92   16.30
  -4   5   3  755.32   15.50
   3  -5  -3  247.98    6.30
   3  -5  -3  255.67    6.20
   3  -5  -3  249.78    6.20
  -3   5   3  243.38    6.20
  -3   5   3  255.87    6.10
   2  -5  -3    6.20    0.80
   2  -5  -3    8.90    0.90
   2  -5  -3    9.10    0.90
  -2   5   3    6.60    0.80
  -2   5   3    8.70    0.90
  -2   5   3    9.20    0.90
   1  -5  -3  288.57    6.80
   1  -5  -3  280.27    6.80
   1  -5  -3  283.57    6.70
  -1   5   3  289.27    6.80
  -1   5   3  287.37    6.80
  -1   5   3  286.77    6.70
   0  -5  -3  942.11   19.90
   0  -5  -3  911.61   20.00
   0  -5  -3  930.41   19.80
   0   5   3  972.80   20.00
   0   5   3  971.10   20.00
  -1  -5  -3   47.30    1.60
  -1  -5  -3   44.80    1.70
  -1  -5  -3   48.40    1.50
   1   5   3   47.70    1.70
   1   5   3   46.10    1.70
   1   5   3   47.00    1.80
  -2  -5  -3  967.70   19.60
  -2  -5  -3  963.70   19.60
   2   5   3  914.91   19.70
   2   5   3  926.61   19.60
  -3  -5  -3   30.10    1.10
  -3  -5  -3   29.70    0.90
  -3  -5  -3   31.80    1.10
   3   5   3   28.60    1.20
   3   5   3   28.40    1.40
   3   5   3   29.10    1.40
   3   5   3   28.70    1.20
  -4  -5  -3   65.69    1.70
  -4  -5  -3   65.99    2.20
  -4  -5  -3   66.59    1.70
   4   5   3   65.49    2.40
   4   5   3   62.09    2.20
   4   5   3   62.49    1.80
   4   5   3   63.49    1.90
  -5  -5  -3    3.40    0.60
   5   5   3    3.90    0.50
   5   5   3    2.10    0.50
   5   5   3    3.10    0.40
   5   5   3    2.70    0.50
   5   5   3    3.10    0.20
  -6  -5  -3   50.89    1.90
   6   5   3   46.60    2.00
   6   5   3   49.50    1.40
   6   5   3   48.70    2.00
   6   5   3   49.00    1.30
   6   5   3   47.60    1.80
   6   5   3   49.30    1.40
   7   5   3    6.30    0.80
   7   5   3    6.50    0.50
   7   5   3    6.40    0.50
   7   5   3    6.60    0.70
   7   5   3    6.40    0.50
   7   5   3    7.80    1.00
   8   5   3   48.60    1.50
   8   5   3   50.09    1.90
   8   5   3   47.50    1.40
   8   5   3   50.29    2.10
   8   5   3   49.90    1.40
   8   5   3   47.60    2.20
   9   5   3    0.60    0.40
   9   5   3    1.40    0.30
   9   5   3    0.70    0.30
   9   5   3    0.60    0.60
   9   5   3    1.20    0.40
   9   5   3    1.10    0.60
  10   5   3    4.80    0.50
  10   5   3    6.10    1.10
  10   5   3    4.50    0.50
  10   5   3    5.50    0.90
  10   5   3    5.00    0.70
  10   5   3    4.70    0.60
  11   5   3    8.30    0.70
  11   5   3   10.10    1.30
  11   5   3    8.10    0.60
  11   5   3    9.10    1.20
  11   5   3    9.50    0.90
  11   5   3    9.30    0.90
  12   5   3   33.70    1.60
  12   5   3   36.30    1.30
  12   5   3   37.90    1.40
  12   5   3   36.70    1.50
  12   5   3   35.00    2.10
  12   5   3   41.00    2.00
  13   5   3    7.10    1.20
  13   5   3    7.40    1.00
  13   5   3    7.10    0.70
  13   5   3    5.90    1.00
  13   5   3    6.20    0.70
  14   5   3    7.10    1.00
  14   5   3    6.90    0.90
  14   5   3    8.20    0.90
   9  -6  -3    1.90    0.90
   8  -6  -3   62.09    2.60
   8  -6  -3   65.19    3.20
  -8   6   3   64.49    2.60
  -8   6   3   67.49    2.30
   7  -6  -3    9.70    1.10
   7  -6  -3    9.00    1.40
  -7   6   3    8.30    1.00
  -7   6   3   10.80    1.20
   6  -6  -3   12.70    1.20
   6  -6  -3   14.00    1.40
   6  -6  -3   15.90    1.60
  -6   6   3   13.20    1.30
  -6   6   3   13.90    1.20
   5  -6  -3    5.10    1.00
   5  -6  -3    5.90    1.00
   5  -6  -3    8.50    1.10
  -5   6   3    6.10    0.90
  -5   6   3    6.90    1.00
   4  -6  -3  123.39    3.80
   4  -6  -3  128.09    4.00
   4  -6  -3  119.29    3.80
  -4   6   3  126.79    3.10
  -4   6   3  124.89    3.80
  -4   6   3  117.49    3.80
  -4   6   3  122.49    3.70
  -4   6   3  121.09    3.10
   3  -6  -3  382.36    9.10
   3  -6  -3  397.86    9.20
   3  -6  -3  393.86    9.30
  -3   6   3  381.96    9.00
  -3   6   3  378.46    9.10
  -3   6   3  377.76    9.20
   2  -6  -3   27.80    1.60
   2  -6  -3   29.20    1.60
   2  -6  -3   29.50    1.50
  -2   6   3   31.10    1.60
  -2   6   3   30.80    1.50
  -2   6   3   29.10    1.60
   1  -6  -3   13.20    1.00
   1  -6  -3   13.80    1.10
   1  -6  -3   12.60    1.10
  -1   6   3   13.50    1.10
  -1   6   3   14.80    1.10
  -1   6   3   14.20    1.10
   0  -6  -3   61.09    2.10
   0  -6  -3   66.39    2.20
   0  -6  -3   69.89    2.30
   0   6   3   57.49    2.20
   0   6   3   64.39    2.20
  -1  -6  -3   10.20    0.90
  -1  -6  -3    8.60    0.90
  -1  -6  -3    9.20    0.70
  -1  -6  -3    9.10    0.80
   1   6   3    9.40    0.90
   1   6   3    9.80    0.90
   1   6   3    8.10    0.90
  -2  -6  -3    3.50    0.50
  -2  -6  -3    5.40    0.70
  -2  -6  -3    6.30    0.70
  -2  -6  -3    5.80    0.50
   2   6   3    5.50    0.70
   2   6   3    6.30    0.70
  -3  -6  -3  444.66   10.10
  -3  -6  -3  451.25    9.40
  -3  -6  -3  446.46    9.60
  -3  -6  -3  458.15    9.60
   3   6   3  458.55   10.10
   3   6   3  423.26    9.70
   3   6   3  432.26    9.80
   3   6   3  430.16   10.00
  -4  -6  -3    2.20    0.30
  -4  -6  -3    2.00    0.60
  -4  -6  -3    2.30    0.40
  -4  -6  -3    2.40    0.40
   4   6   3    2.40    0.60
   4   6   3    2.10    0.60
   4   6   3    2.60    0.50
   4   6   3    2.40    0.50
  -5  -6  -3  161.68    3.50
  -5  -6  -3  166.78    3.50
  -5  -6  -3  165.98    3.60
  -5  -6  -3  164.18    4.50
   5   6   3  161.48    4.50
   5   6   3  165.38    4.00
   5   6   3  158.78    4.40
   5   6   3  163.48    4.00
   5   6   3  173.48    3.60
  -6  -6  -3  333.97    7.90
   6   6   3  326.87    7.80
   6   6   3  323.97    8.00
   6   6   3  325.17    8.00
   6   6   3  336.57    7.30
   6   6   3  332.97    7.30
   6   6   3  335.57    7.00
  -7  -6  -3    0.40    0.40
   7   6   3    0.20    0.40
   7   6   3    0.50    0.60
   7   6   3    0.80    0.20
   7   6   3   -0.30    0.50
   7   6   3    0.20    0.30
   7   6   3    0.60    0.30
   8   6   3  251.07    5.50
   8   6   3  248.28    5.50
   8   6   3  245.28    6.50
   8   6   3  247.48    6.60
   8   6   3  246.08    6.20
   8   6   3  246.98    5.50
   9   6   3    0.40    0.30
   9   6   3    1.20    0.60
   9   6   3    1.40    0.50
   9   6   3    0.90    0.60
   9   6   3    1.00    0.30
   9   6   3    0.70    0.30
  10   6   3   45.00    1.40
  10   6   3   49.00    2.00
  10   6   3   45.10    2.30
  10   6   3   44.10    1.40
  10   6   3   45.30    2.20
  10   6   3   46.30    1.70
  11   6   3   -0.50    0.40
  11   6   3    1.20    0.40
  11   6   3    0.20    0.50
  11   6   3    0.20    0.30
  11   6   3    0.70    0.40
  11   6   3    0.90    0.70
  12   6   3    1.10    0.30
  12   6   3    0.50    0.40
  12   6   3    1.10    0.80
  12   6   3    0.80    0.40
  12   6   3    0.80    0.50
  12   6   3    0.80    0.70
  13   6   3   58.79    2.10
  13   6   3   57.19    1.90
  13   6   3   59.69    2.20
  13   6   3   63.89    2.70
  13   6   3   58.79    1.70
  14   6   3   12.10    0.90
  14   6   3   11.20    1.20
  14   6   3   11.80    1.00
   8  -7  -3    2.20    1.20
   8  -7  -3    1.10    0.60
  -8   7   3    2.40    0.60
  -8   7   3    3.40    0.80
   7  -7  -3   -1.00    0.80
   7  -7  -3    0.70    0.60
  -7   7   3    0.70    0.60
  -7   7   3    1.20    0.60
   6  -7  -3    9.20    1.40
   6  -7  -3    8.90    1.10
  -6   7   3    9.80    1.30
  -6   7   3    8.30    1.10
   5  -7  -3   30.50    1.80
   5  -7  -3   30.00    2.00
   5  -7  -3   32.00    2.30
   5  -7  -3   29.00    1.80
  -5   7   3   29.90    1.10
  -5   7   3   31.30    1.90
  -5   7   3   32.00    1.80
  -5   7   3   29.40    1.10
   4  -7  -3   -0.40    0.50
   4  -7  -3    0.20    0.70
   4  -7  -3   -0.40    0.30
   4  -7  -3    0.30    0.80
  -4   7   3    0.00    0.50
  -4   7   3    0.80    0.60
  -4   7   3   -0.20    0.30
  -4   7   3    0.00    0.40
  -4   7   3    0.60    0.50
   3  -7  -3   18.30    1.40
   3  -7  -3   20.10    1.50
   3  -7  -3   22.70    1.60
   3  -7  -3   23.20    1.50
  -3   7   3   21.70    1.60
  -3   7   3   23.50    1.60
  -3   7   3   23.30    0.90
  -3   7   3   22.70    1.50
   2  -7  -3   44.70    2.10
   2  -7  -3   48.00    2.10
   2  -7  -3   43.20    2.00
   2  -7  -3   42.80    2.00
  -2   7   3   46.30    2.10
  -2   7   3   47.70    2.20
  -2   7   3   49.50    1.60
  -2   7   3   47.00    2.00
   1  -7  -3   21.00    1.50
   1  -7  -3   23.20    1.30
   1  -7  -3   20.70    1.30
   1  -7  -3   20.80    1.40
  -1   7   3   22.10    1.40
  -1   7   3   20.60    1.50
  -1   7   3   20.90    1.40
   0  -7  -3   89.19    2.70
   0  -7  -3   83.19    2.70
   0  -7  -3   82.49    2.80
   0  -7  -3   85.49    2.90
   0   7   3   85.79    2.90
   0   7   3   85.49    2.80
   0   7   3   83.99    2.90
  -1  -7  -3   88.69    3.00
  -1  -7  -3   90.19    2.60
  -1  -7  -3   87.39    2.80
  -1  -7  -3   83.19    3.60
   1   7   3   86.89    2.80
   1   7   3   92.39    2.90
   1   7   3   87.19    3.00
  -2  -7  -3  254.07    6.00
  -2  -7  -3  253.27    5.80
  -2  -7  -3  261.57    6.10
  -2  -7  -3  242.18    6.40
   2   7   3  249.08    6.10
   2   7   3  253.17    6.40
  -3  -7  -3  217.68    5.70
  -3  -7  -3  218.08    5.10
  -3  -7  -3  216.88    4.90
  -3  -7  -3  218.88    5.10
   3   7   3  206.38    5.20
   3   7   3  212.38    5.60
   3   7   3  214.68    5.40
  -4  -7  -3    1.20    0.30
  -4  -7  -3    1.20    0.40
  -4  -7  -3    0.80    0.40
  -4  -7  -3    1.30    0.40
   4   7   3    0.90    0.50
   4   7   3    1.40    0.50
   4   7   3    1.30    0.60
   4   7   3    0.30    0.40
  -5  -7  -3   71.29    1.80
  -5  -7  -3   69.29    2.60
  -5  -7  -3   69.19    1.80
  -5  -7  -3   72.59    1.90
   5   7   3   72.39    2.60
   5   7   3   72.99    2.60
   5   7   3   73.69    1.90
   5   7   3   72.59    2.70
   5   7   3   75.99    2.30
   5   7   3   69.49    2.20
  -6  -7  -3    0.50    0.50
   6   7   3    0.60    0.20
   6   7   3    0.30    0.40
   6   7   3    0.20    0.50
   6   7   3   -0.20    0.30
   6   7   3    0.80    0.60
   6   7   3    0.60    0.40
  -7  -7  -3  356.46    8.80
   7   7   3  362.96    8.10
   7   7   3  372.76    8.10
   7   7   3  366.56    7.80
   7   7   3  368.96    8.80
   7   7   3  366.86    9.00
   7   7   3  368.76    9.00
   8   7   3   50.69    1.40
   8   7   3   48.30    1.60
   8   7   3   49.30    1.60
   8   7   3   43.70    2.20
   8   7   3   47.10    2.10
   8   7   3   50.09    2.30
   9   7   3   -0.20    0.50
   9   7   3    1.00    0.50
   9   7   3    0.60    0.30
   9   7   3    0.80    0.60
   9   7   3   -0.10    0.30
   9   7   3    0.70    0.30
  10   7   3    0.50    0.30
  10   7   3    0.90    0.30
  10   7   3    0.50    0.40
  10   7   3    1.00    0.70
  10   7   3    2.60    0.80
  10   7   3    0.60    0.50
  11   7   3   13.10    1.40
  11   7   3   12.60    0.70
  11   7   3   12.30    1.10
  11   7   3   10.90    0.80
  11   7   3   11.80    0.80
  12   7   3   62.39    1.90
  12   7   3   65.59    2.10
  12   7   3   62.79    1.80
  12   7   3   62.09    2.80
  12   7   3   63.89    2.50
  13   7   3   77.39    3.20
  13   7   3   76.59    2.70
  13   7   3   78.89    2.50
  13   7   3   72.39    2.00
  13   7   3   75.59    2.10
   7  -8  -3   28.10    2.60
   7  -8  -3   25.00    1.80
  -7   8   3   29.10    1.80
  -7   8   3   27.10    1.80
   6  -8  -3    4.80    1.20
  -6   8   3    3.80    0.90
  -6   8   3    6.40    1.10
   5  -8  -3   26.30    1.80
   5  -8  -3   24.80    2.00
  -5   8   3   24.80    1.70
  -5   8   3   23.00    1.10
  -5   8   3   18.10    1.60
  -5   8   3   25.40    1.10
   4  -8  -3    4.20    0.80
   4  -8  -3    5.80    1.10
   4  -8  -3    5.50    1.00
   4  -8  -3    7.00    1.30
  -4   8   3    5.60    1.00
  -4   8   3    5.40    0.70
  -4   8   3    6.50    0.80
   3  -8  -3    8.20    1.10
   3  -8  -3    8.30    1.30
  -3   8   3   10.10    1.20
  -3   8   3    9.30    1.20
   2  -8  -3    4.10    0.90
   2  -8  -3    5.30    0.90
   2  -8  -3    6.90    1.10
  -2   8   3    5.00    0.90
  -2   8   3    7.00    1.10
  -2   8   3    5.40    1.00
  -2   8   3    6.30    0.70
   1  -8  -3    3.80    0.70
   1  -8  -3    3.10    0.70
   1  -8  -3    5.10    1.00
   1  -8  -3    4.50    0.80
  -1   8   3    4.80    0.90
  -1   8   3    4.50    0.90
  -1   8   3    4.70    0.70
  -1   8   3    4.50    0.90
   0  -8  -3   74.59    2.90
   0  -8  -3   69.59    2.60
   0  -8  -3   75.79    2.60
   0  -8  -3   74.09    2.80
   0   8   3   77.49    2.90
   0   8   3   75.49    2.90
   0   8   3   76.69    2.40
   0   8   3   76.89    2.70
  -1  -8  -3   57.39    2.20
  -1  -8  -3   54.79    2.20
  -1  -8  -3   52.59    2.40
  -1  -8  -3   54.89    2.00
   1   8   3   56.49    2.10
   1   8   3   54.39    2.40
   1   8   3   55.19    2.20
   1   8   3   52.09    2.30
  -2  -8  -3   15.40    1.00
  -2  -8  -3   15.10    1.10
  -2  -8  -3   15.50    1.30
  -2  -8  -3   15.50    1.10
   2   8   3   15.50    1.10
   2   8   3   16.60    1.30
   2   8   3   17.40    1.30
   2   8   3   13.50    1.10
  -3  -8  -3   73.09    2.40
  -3  -8  -3   76.69    2.90
  -3  -8  -3   75.99    2.40
  -3  -8  -3   73.69    2.20
   3   8   3   76.59    2.70
   3   8   3   75.69    2.50
   3   8   3   76.09    2.70
   3   8   3   76.19    2.80
  -4  -8  -3  252.37    6.60
  -4  -8  -3  250.77    5.80
  -4  -8  -3  250.27    5.80
  -4  -8  -3  252.77    5.70
   4   8   3  249.78    6.10
   4   8   3  264.67    6.50
   4   8   3  248.88    6.60
   4   8   3  247.88    6.50
   4   8   3  251.07    6.20
  -5  -8  -3   38.80    1.30
  -5  -8  -3   40.00    2.00
  -5  -8  -3   37.60    1.30
  -5  -8  -3   37.80    1.30
   5   8   3   37.40    1.90
   5   8   3   36.10    1.90
   5   8   3   39.60    2.00
   5   8   3   39.00    1.70
   5   8   3   38.20    1.60
  -6  -8  -3   43.90    2.20
  -6  -8  -3   47.90    1.50
   6   8   3   48.60    2.30
   6   8   3   53.49    1.80
   6   8   3   49.60    2.20
   6   8   3   46.70    2.30
   6   8   3   48.40    1.90
   6   8   3   50.99    1.50
  -7  -8  -3  156.98    4.70
   7   8   3  157.58    4.10
   7   8   3  166.08    4.70
   7   8   3  150.98    4.80
   7   8   3  165.18    3.70
   7   8   3  154.78    4.00
   8   8   3   51.79    1.50
   8   8   3   49.00    2.40
   8   8   3   51.79    2.30
   8   8   3   48.00    2.40
   8   8   3   50.79    1.80
   8   8   3   51.09    1.80
   9   8   3    0.50    0.60
   9   8   3   -0.40    0.40
   9   8   3   -0.20    0.30
   9   8   3    0.50    0.50
   9   8   3    0.10    0.40
   9   8   3   -0.10    0.20
  10   8   3    3.50    0.50
  10   8   3    4.00    1.00
  10   8   3    3.00    0.80
  10   8   3    1.50    0.80
  10   8   3    3.70    0.50
  10   8   3    3.20    0.50
  11   8   3   15.20    1.50
  11   8   3   15.80    0.90
  11   8   3   15.40    1.30
  11   8   3   13.90    0.80
  12   8   3    8.80    0.70
  12   8   3    9.50    0.80
  12   8   3    7.80    1.00
  12   8   3    8.30    1.30
  12   8   3    9.30    0.70
  13   8   3    6.70    0.70
  13   8   3    7.20    1.20
  13   8   3    6.00    0.60
  13   8   3    4.40    0.80
  13   8   3    5.20    0.50
  -6   9   3    9.20    1.20
   5  -9  -3   17.90    1.60
   5  -9  -3   18.00    1.90
  -5   9   3   17.70    1.00
  -5   9   3   17.60    1.60
  -5   9   3   17.50    1.00
   4  -9  -3    2.10    0.80
   4  -9  -3    2.10    0.90
  -4   9   3    3.00    0.80
  -4   9   3    2.40    0.90
  -4   9   3    1.80    0.60
  -4   9   3    2.50    0.90
   3  -9  -3    1.20    0.70
   3  -9  -3    0.70    0.80
   3  -9  -3    0.60    0.60
  -3   9   3    0.90    0.70
  -3   9   3    0.50    0.70
  -3   9   3    1.70    0.80
   2  -9  -3    2.70    0.80
   2  -9  -3    2.10    0.90
  -2   9   3    3.00    0.50
  -2   9   3    1.20    0.70
  -2   9   3    2.90    0.90
   1  -9  -3   -0.60    0.40
   1  -9  -3   -0.30    0.50
   1  -9  -3   -0.70    0.60
  -1   9   3   -0.20    0.60
  -1   9   3    0.00    0.60
  -1   9   3   -0.20    0.40
   0  -9  -3   46.60    2.20
   0  -9  -3   48.90    2.10
   0  -9  -3   43.70    1.90
   0  -9  -3   41.30    2.20
   0   9   3   41.90    1.80
   0   9   3   48.30    2.20
   0   9   3   44.00    2.30
  -1  -9  -3   20.20    1.30
  -1  -9  -3   21.80    1.50
  -1  -9  -3   21.40    1.60
  -1  -9  -3   20.90    1.40
   1   9   3   20.40    1.40
   1   9   3   15.90    1.60
   1   9   3   22.00    1.70
  -2  -9  -3  109.09    3.40
  -2  -9  -3  112.29    3.90
  -2  -9  -3  114.39    3.50
   2   9   3  121.09    3.80
   2   9   3  109.19    3.80
   2   9   3  107.69    3.50
   2   9   3  116.49    3.60
  -3  -9  -3    5.90    0.80
  -3  -9  -3    6.80    0.70
  -3  -9  -3    8.00    0.90
   3   9   3    6.40    0.90
   3   9   3    5.60    0.90
   3   9   3    5.80    1.00
   3   9   3    7.20    1.00
  -4  -9  -3   38.00    2.10
  -4  -9  -3   40.90    1.50
  -4  -9  -3   42.30    1.60
  -4  -9  -3   41.60    1.60
   4   9   3   42.80    2.10
   4   9   3   42.40    2.00
   4   9   3   40.10    1.90
   4   9   3   44.10    2.20
  -5  -9  -3   99.39    2.70
  -5  -9  -3  103.09    2.80
  -5  -9  -3  101.19    2.70
  -5  -9  -3   97.99    3.60
   5   9   3  102.09    3.30
   5   9   3  102.89    3.10
   5   9   3  101.39    3.50
   5   9   3   98.89    3.50
   5   9   3  101.19    3.60
  -6  -9  -3   81.89    2.20
  -6  -9  -3   80.69    3.20
   6   9   3   82.99    2.60
   6   9   3   89.69    3.20
   6   9   3   79.39    3.20
   6   9   3   81.99    2.70
   6   9   3   69.49    3.00
  -7  -9  -3  100.09    3.70
   7   9   3  106.69    3.70
   7   9   3  103.69    3.20
   7   9   3  107.09    3.10
   7   9   3  110.09    3.90
   7   9   3  109.89    2.70
   8   9   3  131.59    3.20
   8   9   3  135.99    4.60
   8   9   3  145.49    4.50
   8   9   3  130.99    3.60
   9   9   3   20.80    1.20
   9   9   3   21.80    0.90
   9   9   3   21.30    1.20
   9   9   3   20.30    1.80
   9   9   3   21.90    1.60
   9   9   3   20.60    1.70
  10   9   3    0.70    0.40
  10   9   3    0.40    0.30
  10   9   3    0.80    0.60
  10   9   3    0.20    0.40
  10   9   3    0.80    0.70
  11   9   3   32.70    1.40
  11   9   3   33.40    1.20
  11   9   3   33.00    1.40
  11   9   3   34.90    2.20
  11   9   3   30.30    1.90
  12   9   3    2.80    0.90
  12   9   3    2.10    0.50
  12   9   3    3.20    0.60
  12   9   3    2.30    0.70
  13   9   3    3.00    0.60
  13   9   3    4.50    1.10
  13   9   3    3.00    0.80
  13   9   3    3.70    0.60
  13   9   3    4.40    0.60
   6 -10  -3    1.10    1.10
  -6  10   3    0.90    0.80
   5 -10  -3    0.20    1.10
  -5  10   3    0.30    0.40
  -5  10   3    0.40    0.70
   4 -10  -3    6.90    1.40
  -4  10   3    5.90    0.80
  -4  10   3    5.50    0.80
  -4  10   3    6.40    1.20
  -4  10   3    6.80    1.20
   3 -10  -3  100.29    4.00
   3 -10  -3  103.59    4.00
  -3  10   3   99.19    3.30
  -3  10   3  104.79    3.40
  -3  10   3  105.89    3.90
  -3  10   3  101.89    3.80
   2 -10  -3   28.90    1.80
   2 -10  -3   26.40    2.00
   2 -10  -3   29.10    2.00
  -2  10   3   26.40    1.90
  -2  10   3   27.70    1.20
  -2  10   3   28.40    1.90
   1 -10  -3    0.60    0.60
   1 -10  -3    0.40    0.70
   1 -10  -3    0.70    0.60
  -1  10   3    0.20    0.70
  -1  10   3    0.00    0.70
  -1  10   3    0.50    0.40
   0 -10  -3   19.20    1.40
   0 -10  -3   16.00    1.60
   0  10   3   20.60    1.70
   0  10   3   21.90    1.60
   0  10   3   18.90    1.60
  -1 -10  -3   45.00    2.00
  -1 -10  -3   44.30    2.20
  -1 -10  -3   45.70    2.40
  -1 -10  -3   42.60    2.00
   1  10   3   45.50    2.00
   1  10   3   47.30    2.40
   1  10   3   45.60    2.30
  -2 -10  -3   12.30    1.30
  -2 -10  -3   11.40    1.30
  -2 -10  -3   15.10    1.10
  -2 -10  -3   13.10    1.20
   2  10   3   13.20    1.20
   2  10   3   12.70    1.40
   2  10   3   14.70    1.30
   2  10   3   15.50    1.50
  -3 -10  -3   13.90    1.20
  -3 -10  -3   13.00    1.00
  -3 -10  -3   12.90    1.10
   3  10   3   14.60    1.40
   3  10   3   12.50    1.20
   3  10   3   16.40    1.50
   3  10   3   16.10    1.30
  -4 -10  -3    8.90    0.90
  -4 -10  -3    7.50    0.80
   4  10   3    6.40    1.00
   4  10   3    8.80    1.10
   4  10   3    7.70    1.10
   4  10   3   10.70    1.10
  -5 -10  -3   19.00    1.00
  -5 -10  -3   18.00    1.00
  -5 -10  -3   18.40    1.00
   5  10   3   19.50    1.40
   5  10   3   18.70    1.60
   5  10   3   16.60    1.40
   5  10   3   18.80    1.60
   5  10   3   14.60    1.40
  -6 -10  -3   17.70    0.70
  -6 -10  -3   17.50    1.00
   6  10   3   17.90    1.60
   6  10   3   19.90    1.70
   6  10   3   16.70    1.30
   6  10   3   18.30    1.30
  -7 -10  -3   25.60    1.10
   7  10   3   27.00    1.60
   7  10   3   26.90    1.90
   7  10   3   29.80    1.90
   7  10   3   27.00    1.50
   8  10   3   33.80    1.60
   8  10   3   34.60    2.20
   8  10   3   35.90    1.30
   8  10   3   34.10    2.20
   8  10   3   35.30    1.70
   9  10   3   40.80    1.80
   9  10   3   41.00    2.30
   9  10   3   38.70    2.40
   9  10   3   39.40    1.30
   9  10   3   40.00    1.70
  10  10   3   12.30    1.40
  10  10   3   11.80    1.00
  10  10   3   12.90    0.70
  10  10   3   13.50    1.70
  10  10   3   11.40    1.00
  11  10   3   -0.20    0.50
  11  10   3    0.30    0.30
  11  10   3    0.40    0.50
  11  10   3   -0.30    0.40
  11  10   3    0.00    0.80
  12  10   3   26.30    1.90
  12  10   3   28.70    1.30
  12  10   3   25.00    1.30
  12  10   3   26.40    2.10
  13  10   3   -0.70    0.50
  13  10   3    0.10    0.40
  13  10   3   -0.50    0.70
  -5  11   3   17.30    1.20
   4 -11  -3   15.40    1.90
  -4  11   3   12.20    1.20
  -4  11   3   13.10    1.20
  -4  11   3   16.00    1.70
  -4  11   3   13.30    1.60
   3 -11  -3    0.10    0.90
  -3  11   3    0.70    0.70
  -3  11   3    0.40    0.50
  -3  11   3    0.60    0.80
  -3  11   3    1.30    0.60
   2 -11  -3   44.20    2.60
  -2  11   3   43.00    2.50
  -2  11   3   47.90    2.60
  -2  11   3   44.90    1.60
   1 -11  -3    6.40    1.10
   1 -11  -3    6.60    1.20
  -1  11   3    8.30    0.80
  -1  11   3    7.00    1.20
  -1  11   3    6.70    1.20
   0 -11  -3   11.30    1.30
   0 -11  -3    9.80    1.40
   0 -11  -3    9.40    1.40
   0  11   3   10.00    1.40
   0  11   3   10.20    1.50
   0  11   3   11.70    1.10
  -1 -11  -3   43.70    2.30
  -1 -11  -3   43.10    2.50
  -1 -11  -3   45.10    2.10
   1  11   3   40.40    2.00
   1  11   3   47.00    2.50
   1  11   3   41.90    2.30
  -2 -11  -3    4.60    0.90
  -2 -11  -3    5.30    0.90
  -2 -11  -3    4.10    1.00
  -2 -11  -3    4.70    0.80
   2  11   3    4.10    0.90
   2  11   3    5.10    1.00
   2  11   3    4.60    1.10
   2  11   3    4.60    0.90
  -3 -11  -3   11.70    1.20
  -3 -11  -3   11.10    1.10
  -3 -11  -3    9.20    1.00
   3  11   3   13.60    1.50
   3  11   3   10.20    1.40
   3  11   3   11.00    1.30
  -4 -11  -3    2.40    0.60
  -4 -11  -3    2.90    0.60
  -4 -11  -3    4.50    0.80
   4  11   3    5.20    1.10
   4  11   3    3.30    0.80
   4  11   3    2.50    0.90
   4  11   3    3.30    1.00
  -5 -11  -3    0.30    0.40
  -5 -11  -3    0.10    0.30
  -5 -11  -3    0.70    0.50
  -5 -11  -3    1.50    0.50
   5  11   3    1.10    0.80
   5  11   3    0.20    0.60
   5  11   3    1.20    0.70
   5  11   3   -0.20    0.70
  -6 -11  -3   15.10    1.60
  -6 -11  -3   15.00    0.80
  -6 -11  -3   15.30    1.00
  -6 -11  -3   14.80    0.80
   6  11   3   13.60    1.40
   6  11   3   16.50    1.60
   6  11   3   16.50    1.30
   6  11   3   15.70    1.60
   6  11   3   17.60    1.40
  -7 -11  -3  144.29    3.70
  -7 -11  -3  148.59    5.10
   7  11   3  146.49    4.20
   7  11   3  137.79    4.90
   7  11   3  150.98    4.90
   7  11   3  140.99    4.90
   7  11   3  141.79    4.40
  -8 -11  -3   27.90    2.00
   8  11   3   26.80    1.60
   8  11   3   26.40    2.00
   8  11   3   27.00    1.60
   8  11   3   29.00    2.00
   9  11   3    1.10    0.60
   9  11   3    0.70    0.50
   9  11   3    0.40    0.70
   9  11   3    1.00    0.70
  10  11   3    9.50    1.30
  10  11   3    9.30    1.00
  10  11   3   11.90    1.10
  10  11   3   10.70    1.60
  11  11   3   48.70    2.80
  11  11   3   44.30    1.90
  11  11   3   46.80    2.60
  11  11   3   45.10    1.90
  12  11   3  103.79    3.10
  12  11   3   97.19    3.10
  12  11   3  109.69    4.10
  12  11   3  101.39    4.50
   3 -12  -3    3.50    1.20
  -3  12   3    3.30    1.00
  -3  12   3    1.60    0.80
  -3  12   3    2.50    0.80
  -3  12   3    2.30    1.00
   2 -12  -3    4.60    1.30
  -2  12   3    3.50    1.00
  -2  12   3    2.00    1.00
  -2  12   3    4.40    0.90
   1 -12  -3   18.10    1.90
  -1  12   3   21.90    1.20
  -1  12   3   17.60    1.90
  -1  12   3   18.50    1.80
   0 -12  -3   -0.40    0.70
   0  12   3    0.30    0.50
   0  12   3    0.10    0.70
   0  12   3   -0.80    0.60
  -1 -12  -3    0.20    0.70
  -1 -12  -3    0.50    0.50
   1  12   3    0.10    0.40
   1  12   3    0.00    0.70
   1  12   3    1.40    0.80
  -2 -12  -3   46.10    2.30
  -2 -12  -3   46.00    2.20
   2  12   3   42.30    2.40
   2  12   3   43.00    2.60
   2  12   3   44.00    2.20
  -3 -12  -3    1.30    0.60
  -3 -12  -3    1.40    0.70
  -3 -12  -3    0.50    0.40
   3  12   3    0.60    0.70
   3  12   3    0.50    0.70
  -4 -12  -3    5.30    0.80
  -4 -12  -3    7.00    0.90
  -4 -12  -3    7.10    0.90
   4  12   3    5.30    1.10
   4  12   3    5.50    1.20
   4  12   3    5.40    1.10
   4  12   3    4.70    1.00
   4  12   3    5.40    1.10
  -5 -12  -3   32.20    1.50
  -5 -12  -3   33.90    1.50
  -5 -12  -3   30.10    1.50
   5  12   3   31.20    2.20
   5  12   3   32.50    2.00
   5  12   3   33.20    2.00
   5  12   3   32.40    1.90
   5  12   3   34.30    2.30
  -6 -12  -3    7.20    0.60
  -6 -12  -3    7.70    0.80
   6  12   3    5.10    1.00
   6  12   3    6.70    1.20
   6  12   3    7.90    1.30
   6  12   3    6.80    1.70
  -7 -12  -3  128.19    3.50
   7  12   3  135.69    4.80
   7  12   3  118.69    4.10
   7  12   3  130.59    4.70
   7  12   3  130.59    4.10
   8  12   3   35.90    2.40
   8  12   3   32.30    1.80
   8  12   3   32.10    2.30
   9  12   3   39.90    2.50
   9  12   3   43.70    2.70
   9  12   3   39.00    1.90
   9  12   3   40.40    2.40
  10  12   3   10.50    1.20
  10  12   3   13.10    1.80
  10  12   3    9.30    1.10
  10  12   3   11.20    1.70
  11  12   3    6.50    1.30
  11  12   3    6.00    1.00
  11  12   3    6.00    1.90
  11  12   3    7.10    0.90
   2 -13  -3   24.60    2.30
  -2  13   3   23.40    2.70
  -2  13   3   25.90    2.20
  -2  13   3   24.10    1.80
   1 -13  -3    1.30    1.10
  -1  13   3    3.20    0.60
  -1  13   3    2.30    1.00
  -1  13   3    2.00    1.00
  -1  13   3    1.60    0.80
   0 -13  -3   26.70    2.10
   0  13   3   25.20    2.10
   0  13   3   26.60    2.00
   0  13   3   29.90    1.60
   0  13   3   26.50    2.30
  -1 -13  -3    1.00    0.80
   1  13   3   -0.10    0.80
   1  13   3    1.20    0.80
   1  13   3    0.30    0.50
   1  13   3    1.20    1.00
  -2 -13  -3   16.00    1.40
  -2 -13  -3   14.10    1.50
   2  13   3   16.20    1.90
   2  13   3   17.00    1.70
   2  13   3   16.10    1.70
  -3 -13  -3   27.80    1.70
  -3 -13  -3   22.70    1.70
   3  13   3   23.50    2.00
   3  13   3   25.70    1.90
   3  13   3   23.80    2.20
   3  13   3   24.60    1.70
  -4 -13  -3   11.40    1.10
  -4 -13  -3   13.20    1.20
  -4 -13  -3   13.00    1.20
   4  13   3   13.60    1.80
   4  13   3    9.60    1.40
   4  13   3   11.30    1.50
  -5 -13  -3   14.10    1.10
  -5 -13  -3   14.70    1.10
  -5 -13  -3   13.00    1.10
   5  13   3   13.30    1.80
   5  13   3   15.70    1.90
   5  13   3   12.20    1.50
  -6 -13  -3   14.50    0.90
  -6 -13  -3   16.00    1.10
   6  13   3   16.60    1.90
   6  13   3   15.50    1.50
   6  13   3   12.50    1.60
  -7 -13  -3   55.49    2.00
   7  13   3   62.39    3.30
   7  13   3   47.80    3.00
   7  13   3   57.79    2.60
  -8 -13  -3   39.80    1.60
   8  13   3   37.70    2.60
   8  13   3   36.80    2.60
   8  13   3   37.50    2.10
   9  13   3  115.19    3.80
   9  13   3  119.39    5.50
   9  13   3  116.49    4.70
  10  13   3    1.40    0.90
  10  13   3    3.80    1.20
  10  13   3    5.70    0.90
  11  13   3   65.79    2.60
  11  13   3   64.19    3.50
  11  13   3   63.59    3.50
   0 -14  -3   30.10    2.20
   0  14   3   25.70    2.10
   0  14   3   26.50    2.50
   0  14   3   30.30    2.30
   0  14   3   30.20    1.60
  -1 -14  -3   15.20    1.70
   1  14   3   12.30    1.60
   1  14   3   13.30    1.80
   1  14   3   18.70    1.40
   1  14   3   10.00    1.60
  -2 -14  -3    4.30    1.10
   2  14   3    5.00    1.50
   2  14   3    7.10    1.40
  -3 -14  -3    5.60    1.00
   3  14   3    5.20    1.20
   3  14   3    6.50    1.30
   3  14   3    3.30    1.10
  -4 -14  -3    1.80    0.60
  -4 -14  -3    0.80    0.60
  -4 -14  -3    1.00    0.70
   4  14   3    0.70    0.80
   4  14   3   -0.30    0.80
   4  14   3    0.10    0.90
  -5 -14  -3   37.50    1.80
  -5 -14  -3   36.90    1.70
   5  14   3   35.00    2.30
   5  14   3   35.90    2.60
   5  14   3   37.10    2.70
  -6 -14  -3    3.60    0.70
  -6 -14  -3    4.70    0.60
   6  14   3    5.60    1.30
   6  14   3    4.40    1.00
   6  14   3    2.90    1.10
  -7 -14  -3   15.80    1.10
   7  14   3   16.40    1.60
   7  14   3   14.50    2.10
  -8 -14  -3    5.60    0.70
   8  14   3    3.90    1.30
   8  14   3    5.70    1.40
   8  14   3    4.40    1.00
   9  14   3    0.80    0.60
   9  14   3   -0.60    0.90
   9  14   3    2.40    1.10
  -3 -15  -3    2.20    0.90
   3  15   3    5.10    1.20
   3  15   3    3.60    1.10
   3  15   3    5.50    1.50
  -4 -15  -3    1.50    0.70
   4  15   3    0.10    0.80
   4  15   3    0.20    1.00
   4  15   3    0.40    0.90
  -5 -15  -3    0.40    0.60
   5  15   3    0.30    0.80
   5  15   3    0.40    1.00
   5  15   3    0.10    0.70
  -6 -15  -3   -0.20    0.40
   6  15   3    2.00    1.20
   6  15   3    1.60    1.00
   6  15   3   -1.00    0.90
   7  15   3   17.30    2.60
   7  15   3   19.50    2.70
   7  15   3   13.70    2.20
   7  14  -4    0.20    0.60
   6  14  -4    6.50    1.20
   6  14  -4    7.10    1.20
   6  14  -4    7.00    1.50
   5  14  -4    1.80    0.90
   5  14  -4    4.10    0.90
   5  14  -4    4.60    1.00
   4  14  -4    1.30    0.90
   4  14  -4    0.70    0.80
   4  14  -4    0.80    0.80
  -4 -14   4   -0.90    0.40
  -4 -14   4    1.30    0.50
   3  14  -4    1.80    0.90
   3  14  -4    5.40    1.10
   3  14  -4    3.10    1.00
  -3 -14   4    2.80    0.70
  -3 -14   4    3.20    0.70
   2  14  -4    1.10    1.40
  -2 -14   4    0.70    0.70
  -2 -14   4    1.80    0.80
   1  14  -4   -1.30    1.10
   1  14  -4    0.10    0.80
  -1 -14   4   -0.20    0.70
   0  14  -4    9.70    1.60
   0  14  -4    7.10    1.90
   0 -14   4   11.00    1.60
  -1  14  -4    9.90    1.80
   1 -14   4    7.60    1.40
   8  13  -4   32.90    1.80
   8  13  -4   31.20    2.60
   8  13  -4   29.70    1.90
   7  13  -4    9.80    1.70
   7  13  -4    8.70    1.20
   7  13  -4    6.70    1.10
   6  13  -4    1.30    0.60
   6  13  -4    1.00    0.60
   6  13  -4   -0.40    0.70
   5  13  -4   66.59    2.90
   5  13  -4   68.89    3.60
   5  13  -4   71.29    3.00
   4  13  -4    3.40    0.90
   4  13  -4    1.00    0.80
   4  13  -4    1.30    0.70
  -4 -13   4    2.00    0.50
  -4 -13   4    1.50    0.40
   3  13  -4   10.20    1.40
   3  13  -4   11.70    1.40
   3  13  -4   12.10    1.70
  -3 -13   4   11.50    1.10
  -3 -13   4   11.00    1.00
   2  13  -4    4.10    0.90
   2  13  -4    6.50    1.30
   2  13  -4    7.40    1.30
  -2 -13   4    6.70    1.10
   1  13  -4    1.00    0.60
   1  13  -4   -0.30    0.70
   1  13  -4   -0.40    0.70
  -1 -13   4    0.60    0.70
  -1 -13   4    0.60    0.70
   0  13  -4   27.90    2.10
   0  13  -4   26.60    2.20
   0 -13   4   26.20    2.10
  -1  13  -4    1.60    0.90
   1 -13   4    2.30    1.10
  -2  13  -4   15.80    1.80
  -2  13  -4   18.10    1.90
  -3  13  -4    8.80    1.50
  -3  13  -4    8.30    1.40
   3 -13   4    7.50    1.50
   9  12  -4   29.30    1.50
   9  12  -4   29.10    2.50
   9  12  -4   27.50    1.70
   9  12  -4   28.80    1.80
   8  12  -4   33.80    2.60
   8  12  -4   35.70    1.80
   8  12  -4   33.20    1.90
   8  12  -4   32.30    1.90
   7  12  -4    2.70    1.10
   7  12  -4    1.80    0.70
   7  12  -4    4.50    1.00
   7  12  -4    4.30    0.90
  -7 -12   4    2.80    0.90
   6  12  -4   11.90    1.60
   6  12  -4   11.90    1.40
   6  12  -4   11.10    1.30
   6  12  -4   15.00    1.50
  -6 -12   4   11.70    1.30
   5  12  -4    4.30    1.00
   5  12  -4    4.80    1.20
   5  12  -4    3.50    0.90
   5  12  -4    3.90    0.90
  -5 -12   4    4.50    0.90
   4  12  -4   17.10    1.50
   4  12  -4   18.60    2.00
   4  12  -4   17.40    1.80
   4  12  -4   18.60    1.50
  -4 -12   4   17.50    0.90
  -4 -12   4   19.80    1.50
  -4 -12   4   18.80    1.00
   3  12  -4    8.80    1.20
   3  12  -4   11.10    1.40
   3  12  -4    9.60    1.40
   3  12  -4   13.30    1.60
  -3 -12   4    9.10    1.20
  -3 -12   4    9.80    1.00
  -3 -12   4    8.50    1.00
   2  12  -4   19.50    1.50
   2  12  -4   16.80    1.60
   2  12  -4   18.20    1.60
   2  12  -4   18.70    1.80
  -2 -12   4   17.90    1.40
  -2 -12   4   18.10    1.30
   1  12  -4    8.30    1.30
   1  12  -4    7.60    1.30
   1  12  -4    4.50    1.10
  -1 -12   4    5.70    1.10
   0  12  -4  112.59    4.10
   0  12  -4  103.59    3.60
   0  12  -4  107.89    4.20
   0 -12   4  106.69    3.70
   0 -12   4  108.29    3.90
  -1  12  -4   -0.60    0.60
  -1  12  -4   -1.30    0.60
   1 -12   4    0.30    0.80
  -2  12  -4    8.40    1.30
  -2  12  -4    4.40    1.00
   2 -12   4    5.30    1.30
  -3  12  -4   10.00    1.50
  -3  12  -4   10.20    1.60
   3 -12   4   10.80    1.70
  -4  12  -4    2.40    0.90
  -4  12  -4    1.70    0.90
   4 -12   4    2.60    1.20
  10  11  -4    4.70    0.90
  10  11  -4    4.70    0.60
  10  11  -4    3.30    1.00
  10  11  -4    3.60    1.20
  10  11  -4    3.80    0.80
   9  11  -4    0.50    0.50
   9  11  -4    0.40    0.50
   9  11  -4   -0.60    0.70
   9  11  -4    0.40    0.40
   8  11  -4    0.50    0.60
   8  11  -4   -0.10    0.60
   8  11  -4    0.70    0.40
   8  11  -4   -0.20    0.50
   7  11  -4    4.40    0.90
   7  11  -4    6.00    1.00
   7  11  -4    7.00    0.90
   7  11  -4    4.70    1.00
  -7 -11   4    4.40    0.90
   6  11  -4   14.20    2.10
   6  11  -4   16.20    1.80
   6  11  -4   16.50    1.30
   6  11  -4   18.60    1.50
   5  11  -4   17.20    1.30
   5  11  -4   18.40    1.80
   5  11  -4   16.00    1.40
   5  11  -4   20.40    1.60
   4  11  -4   51.09    2.70
   4  11  -4   49.30    2.30
   4  11  -4   47.00    2.70
   4  11  -4   49.50    2.50
   4  11  -4   53.19    2.40
  -4 -11   4   51.09    1.60
   3  11  -4   24.80    1.90
   3  11  -4   24.80    2.00
   3  11  -4   23.80    1.80
   3  11  -4   25.10    1.80
  -3 -11   4   23.60    1.40
   2  11  -4    5.20    1.00
   2  11  -4    8.70    1.30
   2  11  -4    7.80    1.30
   2  11  -4    7.00    1.00
  -2 -11   4    9.40    1.00
  -2 -11   4    9.80    1.10
   1  11  -4    3.10    0.90
   1  11  -4    3.00    0.80
   1  11  -4    3.40    0.90
   1  11  -4    3.10    0.80
   1  11  -4    2.20    0.80
  -1 -11   4    1.80    0.80
  -1 -11   4    2.20    0.70
   0  11  -4  119.99    3.80
   0  11  -4  121.19    4.20
   0  11  -4  123.39    4.20
   0  11  -4  118.69    4.30
   0 -11   4  121.59    4.20
   0 -11   4  116.59    4.00
  -1  11  -4   16.00    1.80
  -1  11  -4   12.80    1.50
  -1  11  -4   14.90    1.50
   1 -11   4   13.50    1.60
   1 -11   4   15.10    1.30
  -2  11  -4    1.90    0.80
  -2  11  -4    1.20    0.70
   2 -11   4    1.10    0.90
  -3  11  -4   29.20    2.10
  -3  11  -4   27.90    1.90
   3 -11   4   30.70    2.30
  -4  11  -4   19.20    1.70
  -4  11  -4   19.20    1.80
   4 -11   4   16.90    2.00
  -5  11  -4    3.40    0.90
  -5  11  -4    4.90    1.10
   5 -11   4    4.30    1.30
  -6  11  -4    0.80    0.80
  -6  11  -4    1.10    0.70
   6 -11   4   -0.70    1.20
  10  10  -4    0.30    0.40
  10  10  -4    1.80    0.50
  10  10  -4    0.90    0.60
  10  10  -4    1.20    0.70
  10  10  -4    0.20    0.70
   9  10  -4   57.39    2.20
   9  10  -4   61.09    2.60
   9  10  -4   56.49    3.10
   9  10  -4   60.09    2.10
   8  10  -4    1.10    0.60
   8  10  -4    1.60    0.60
   8  10  -4    1.20    0.50
   8  10  -4    0.80    0.70
   7  10  -4    0.10    0.50
   7  10  -4    1.40    0.80
   7  10  -4    0.60    0.60
   7  10  -4    0.10    0.40
   6  10  -4    4.30    0.80
   6  10  -4    2.70    0.70
   6  10  -4    4.40    0.80
   6  10  -4    5.70    1.10
  -6 -10   4    4.60    0.80
   5  10  -4  159.78    4.60
   5  10  -4  156.78    4.60
   5  10  -4  151.98    5.00
   5  10  -4  156.28    4.40
   5  10  -4  156.38    5.20
  -5 -10   4  152.58    4.60
   4  10  -4  111.99    4.10
   4  10  -4  107.99    3.40
   4  10  -4  108.59    3.50
   4  10  -4  105.39    3.60
  -4 -10   4  105.99    2.60
  -4 -10   4  107.89    2.70
  -4 -10   4  103.59    3.50
   3  10  -4    0.40    0.60
   3  10  -4    0.70    0.50
   3  10  -4    0.60    0.90
   3  10  -4    0.70    0.70
  -3 -10   4   -0.40    0.30
  -3 -10   4   -0.60    0.40
  -3 -10   4    0.30    0.40
   2  10  -4    9.50    1.30
   2  10  -4    9.10    1.30
   2  10  -4    9.80    1.20
   2  10  -4    9.10    1.10
   2  10  -4    9.10    1.20
  -2 -10   4    7.30    0.90
  -2 -10   4   11.30    1.20
  -2 -10   4   10.00    1.10
   1  10  -4  551.14   12.80
   1  10  -4  550.64   12.90
   1  10  -4  569.44   13.40
   1  10  -4  554.34   13.20
   1  10  -4  570.44   13.00
  -1 -10   4  552.44   12.70
   0  10  -4  101.29    3.80
   0  10  -4  106.69    3.40
   0  10  -4  101.19    3.60
   0  10  -4  103.29    3.80
   0 -10   4  101.29    3.40
   0 -10   4   98.29    3.60
  -1  10  -4   38.50    2.10
  -1  10  -4   36.00    1.70
  -1  10  -4   40.10    2.10
   1 -10   4   34.50    1.90
   1 -10   4   36.30    2.50
  -2  10  -4    2.40    0.90
  -2  10  -4    0.50    0.40
  -2  10  -4    1.10    0.40
  -2  10  -4    2.30    0.80
   2 -10   4    1.70    0.90
   2 -10   4    1.80    0.70
   2 -10   4    1.10    0.60
  -3  10  -4   19.50    1.70
  -3  10  -4   23.10    1.60
  -3  10  -4   21.70    1.70
   3 -10   4   23.90    2.00
  -4  10  -4    3.00    0.90
  -4  10  -4    1.70    0.70
  -4  10  -4    2.00    0.80
   4 -10   4    2.00    1.00
  -5  10  -4   18.50    1.60
  -5  10  -4   24.00    1.70
  -5  10  -4   23.50    1.90
   5 -10   4   18.70    2.00
  -6  10  -4   20.00    1.90
  -6  10  -4   19.70    1.50
  -6  10  -4   23.90    1.90
  -7  10  -4    2.30    0.90
  -7  10  -4    1.30    0.60
   7 -10   4   -0.30    1.00
  11   9  -4    2.20    0.90
  11   9  -4    1.10    0.70
  11   9  -4    2.70    0.40
  11   9  -4    3.00    0.80
  10   9  -4    6.20    0.80
  10   9  -4    5.10    0.90
  10   9  -4    5.30    1.00
  10   9  -4    5.70    1.20
  10   9  -4    7.30    0.70
   9   9  -4    1.40    0.80
   9   9  -4    3.20    0.90
   9   9  -4    1.70    0.70
   9   9  -4    3.20    0.50
   9   9  -4    3.80    0.70
   8   9  -4    8.60    1.30
   8   9  -4    8.90    1.10
   8   9  -4    8.40    0.80
   7   9  -4   32.30    2.50
   7   9  -4   38.00    2.30
   7   9  -4   31.40    1.80
   7   9  -4   33.40    1.50
   7   9  -4   33.00    1.60
   6   9  -4    4.30    0.70
   6   9  -4    3.30    0.80
   6   9  -4    4.20    0.80
   6   9  -4    2.90    0.90
  -6  -9   4    3.60    0.70
  -6  -9   4    3.70    1.00
   5   9  -4   12.80    1.10
   5   9  -4   12.80    1.20
   5   9  -4   12.40    1.20
   5   9  -4   12.90    1.40
  -5  -9   4   14.10    1.20
  -5  -9   4   13.10    1.50
   4   9  -4   64.89    2.60
   4   9  -4   65.89    2.40
   4   9  -4   65.39    2.70
   4   9  -4   66.69    2.50
   4   9  -4   68.99    3.00
  -4  -9   4   64.69    2.50
  -4  -9   4   64.99    1.70
  -4  -9   4   64.69    2.80
  -4  -9   4   64.69    1.70
   3   9  -4   56.59    2.30
   3   9  -4   51.09    2.50
   3   9  -4   52.69    2.40
   3   9  -4   53.99    2.20
   3   9  -4   52.99    2.30
  -3  -9   4   54.59    2.50
  -3  -9   4   51.09    1.80
  -3  -9   4   54.09    2.20
  -3  -9   4   54.49    1.80
   2   9  -4   17.40    1.30
   2   9  -4   17.90    1.50
   2   9  -4   19.10    1.40
   2   9  -4   18.40    1.30
   2   9  -4   18.00    1.50
  -2  -9   4   17.20    1.10
  -2  -9   4   18.20    1.30
  -2  -9   4   14.10    1.30
  -2  -9   4   17.70    1.30
   1   9  -4  244.98    6.60
   1   9  -4  243.88    6.30
   1   9  -4  244.28    6.30
   1   9  -4  243.08    6.70
   1   9  -4  245.58    6.30
  -1  -9   4  242.38    6.40
  -1  -9   4  234.48    6.20
  -1  -9   4  241.48    6.30
   0   9  -4   37.00    1.90
   0   9  -4   36.10    2.10
   0   9  -4   36.90    1.70
   0   9  -4   36.70    2.00
   0   9  -4   33.90    1.90
   0  -9   4   35.90    1.90
   0  -9   4   35.10    1.80
   0  -9   4   36.70    1.80
  -1   9  -4   44.00    2.20
  -1   9  -4   44.70    2.10
  -1   9  -4   45.00    2.20
  -1   9  -4   42.00    2.10
   1  -9   4   42.70    2.20
   1  -9   4   44.00    2.00
   1  -9   4   43.80    2.10
  -2   9  -4   27.50    1.80
  -2   9  -4   26.10    1.70
  -2   9  -4   23.20    1.70
   2  -9   4   25.90    1.80
  -3   9  -4    5.20    1.00
  -3   9  -4    3.70    0.90
  -3   9  -4    2.70    0.80
  -3   9  -4    2.80    0.70
   3  -9   4    3.70    1.10
   3  -9   4    3.30    0.80
  -4   9  -4   13.20    1.20
  -4   9  -4   13.30    1.50
  -4   9  -4   12.70    1.60
   4  -9   4   12.50    1.60
  -5   9  -4   40.40    2.20
  -5   9  -4   36.70    1.90
   5  -9   4   39.70    2.50
  -6   9  -4   26.10    1.60
  -6   9  -4   25.30    1.80
   6  -9   4   22.30    2.10
  -7   9  -4   12.40    1.10
  -7   9  -4   11.60    1.30
  -7   9  -4   10.80    1.40
   7  -9   4   12.70    1.80
  -8   9  -4    2.10    0.80
  -8   9  -4   -0.70    0.60
   8  -9   4    1.40    1.20
  11   8  -4   64.89    2.70
  11   8  -4   64.29    1.80
  11   8  -4   66.09    2.80
  11   8  -4   61.59    3.10
  11   8  -4   61.29    1.80
  10   8  -4   45.50    1.60
  10   8  -4   45.60    1.50
  10   8  -4   49.60    2.40
  10   8  -4   48.60    2.70
  10   8  -4   47.20    2.70
   9   8  -4    4.40    1.00
   9   8  -4    5.80    1.00
   9   8  -4    6.70    0.60
   9   8  -4    6.20    0.70
   9   8  -4    7.50    1.10
   8   8  -4   34.40    2.20
   8   8  -4   39.80    2.00
   8   8  -4   38.20    1.60
   7   8  -4    5.00    0.80
   7   8  -4    5.20    0.70
   7   8  -4    3.20    0.80
   7   8  -4    5.00    1.10
   7   8  -4    4.30    0.80
  -7  -8   4    5.90    1.20
   6   8  -4   20.50    1.30
   6   8  -4   20.90    1.10
   6   8  -4   23.10    1.40
   6   8  -4   21.50    1.70
  -6  -8   4   20.40    1.70
  -6  -8   4   20.40    1.40
   5   8  -4    2.80    0.60
   5   8  -4    3.50    0.90
   5   8  -4    2.40    0.70
   5   8  -4    3.00    0.70
  -5  -8   4    2.10    0.60
  -5  -8   4    0.90    0.60
   4   8  -4   59.99    2.50
   4   8  -4   59.49    2.10
   4   8  -4   61.29    2.70
   4   8  -4   61.29    2.70
   4   8  -4   59.69    2.30
  -4  -8   4   58.99    2.30
  -4  -8   4   62.69    2.70
   3   8  -4  127.79    3.60
   3   8  -4  125.99    3.70
   3   8  -4  125.59    3.80
   3   8  -4  130.59    4.20
   3   8  -4  121.89    3.90
  -3  -8   4  125.09    4.00
  -3  -8   4  126.99    3.70
  -3  -8   4  127.79    3.20
  -3  -8   4  129.39    3.20
   2   8  -4    1.30    0.50
   2   8  -4    0.60    0.60
   2   8  -4    0.90    0.50
   2   8  -4    0.30    0.50
   2   8  -4    2.30    0.70
  -2  -8   4    0.80    0.50
  -2  -8   4    1.70    0.70
  -2  -8   4    0.80    0.40
  -2  -8   4    1.40    0.50
   1   8  -4   28.90    1.60
   1   8  -4   28.20    1.50
   1   8  -4   29.00    1.70
   1   8  -4   27.00    1.70
   1   8  -4   28.30    1.50
  -1  -8   4   30.20    1.60
  -1  -8   4   32.00    1.60
  -1  -8   4   29.30    1.60
   0   8  -4  194.48    5.20
   0   8  -4  188.28    5.20
   0   8  -4  194.28    5.50
   0   8  -4  189.08    5.20
   0   8  -4  194.18    5.50
   0  -8   4  192.48    5.10
   0  -8   4  201.38    5.20
   0  -8   4  202.78    5.30
   0  -8   4  202.08    5.30
  -1   8  -4    1.90    0.60
  -1   8  -4    3.10    0.70
  -1   8  -4    3.20    0.80
  -1   8  -4    5.00    0.80
  -1   8  -4    2.20    0.70
   1  -8   4    2.10    0.60
   1  -8   4    1.00    0.70
   1  -8   4    3.80    0.70
   1  -8   4    2.60    0.70
  -2   8  -4   20.40    1.40
  -2   8  -4   20.70    1.40
  -2   8  -4   17.50    1.40
  -2   8  -4   20.30    1.40
   2  -8   4   19.10    1.30
   2  -8   4   18.90    1.60
  -3   8  -4   23.00    1.50
  -3   8  -4   24.60    1.80
  -3   8  -4   24.40    1.50
  -3   8  -4   25.70    1.60
   3  -8   4   22.50    1.80
  -4   8  -4   16.40    1.40
  -4   8  -4   16.60    1.30
  -4   8  -4   17.00    1.30
   4  -8   4   17.10    1.70
  -5   8  -4   -0.30    0.60
  -5   8  -4    0.20    0.50
  -5   8  -4    0.90    0.50
  -5   8  -4   -0.10    0.50
   5  -8   4    0.00    0.40
   5  -8   4   -0.80    0.70
   5  -8   4    0.50    0.30
  -6   8  -4   39.60    2.00
  -6   8  -4   41.50    2.20
  -6   8  -4   39.10    2.20
  -6   8  -4   40.40    1.80
   6  -8   4   40.30    2.60
  -7   8  -4  229.98    6.20
  -7   8  -4  217.58    6.50
  -7   8  -4  234.28    5.70
  -7   8  -4  235.08    6.40
   7  -8   4  233.18    7.10
  -8   8  -4    0.50    0.60
   8  -8   4   -1.00    1.00
  -9   8  -4    1.80    0.80
   9  -8   4    1.10    1.00
  11   7  -4   10.80    1.10
  11   7  -4   10.00    0.60
  11   7  -4   11.60    1.40
  11   7  -4   10.30    1.30
  10   7  -4   94.79    3.50
  10   7  -4   92.19    3.20
  10   7  -4   94.99    3.80
  10   7  -4   89.99    2.40
   9   7  -4   48.10    2.70
   9   7  -4   42.50    1.50
   9   7  -4   41.40    2.10
   9   7  -4   44.20    2.40
   8   7  -4    1.10    0.60
   8   7  -4   -0.20    0.40
   8   7  -4    0.90    0.40
   8   7  -4   -0.20    0.50
   8   7  -4    0.70    0.30
   7   7  -4    0.80    0.50
   7   7  -4    0.70    0.30
   7   7  -4    0.90    0.50
   7   7  -4    0.80    0.40
   7   7  -4   -0.20    0.50
  -7  -7   4    0.00    0.60
   6   7  -4   41.50    1.90
   6   7  -4   38.60    2.10
   6   7  -4   36.40    1.50
   6   7  -4   38.60    2.10
   6   7  -4   38.90    1.40
  -6  -7   4   35.50    2.10
   5   7  -4    1.30    0.50
   5   7  -4    2.30    0.70
   5   7  -4    0.40    0.50
   5   7  -4    1.10    0.40
   5   7  -4    1.30    0.50
  -5  -7   4    1.10    0.50
  -5  -7   4    0.80    0.60
   4   7  -4   49.80    1.70
   4   7  -4   47.80    1.90
   4   7  -4   44.30    2.20
   4   7  -4   44.80    2.10
   4   7  -4   48.70    1.90
  -4  -7   4   46.70    2.20
  -4  -7   4   46.70    1.90
   3   7  -4    4.10    0.80
   3   7  -4    3.40    0.60
   3   7  -4    3.00    0.70
   3   7  -4    3.40    0.70
   3   7  -4    3.40    0.60
  -3  -7   4    4.50    0.50
  -3  -7   4    3.60    0.40
  -3  -7   4    2.50    0.60
  -3  -7   4    2.70    0.60
   2   7  -4   17.10    1.10
   2   7  -4   20.20    1.30
   2   7  -4   18.10    1.40
   2   7  -4   16.90    1.20
   2   7  -4   17.00    1.10
  -2  -7   4   18.10    1.10
  -2  -7   4   20.30    1.10
  -2  -7   4   17.00    1.30
  -2  -7   4   17.10    0.90
   1   7  -4   12.50    1.00
   1   7  -4   13.80    1.10
   1   7  -4   15.10    1.20
   1   7  -4   13.60    1.00
   1   7  -4   13.10    1.00
  -1  -7   4   15.80    1.00
  -1  -7   4   14.90    1.10
  -1  -7   4   13.50    1.10
  -1  -7   4   13.70    1.00
   0   7  -4    0.20    0.40
   0   7  -4    0.10    0.30
   0   7  -4    0.50    0.40
   0   7  -4    0.90    0.60
   0   7  -4    0.20    0.40
   0  -7   4    0.40    0.50
   0  -7   4    0.40    0.40
   0  -7   4    0.40    0.40
   0  -7   4    0.00    0.30
  -1   7  -4   43.40    1.90
  -1   7  -4   46.30    1.70
  -1   7  -4   45.60    2.00
  -1   7  -4   46.70    2.20
  -1   7  -4   45.60    2.00
   1  -7   4   49.99    1.90
   1  -7   4   49.60    2.10
   1  -7   4   46.10    1.90
   1  -7   4   46.00    1.80
  -2   7  -4  224.48    5.90
  -2   7  -4  229.98    6.10
  -2   7  -4  226.78    5.90
  -2   7  -4  224.28    6.00
  -2   7  -4  228.78    5.90
   2  -7   4  236.48    5.60
   2  -7   4  229.88    6.10
   2  -7   4  227.98    5.90
   2  -7   4  231.88    5.90
  -3   7  -4   24.30    1.40
  -3   7  -4   23.40    1.50
  -3   7  -4   21.40    1.40
  -3   7  -4   24.40    1.60
   3  -7   4   23.30    1.70
   3  -7   4   18.90    1.30
  -4   7  -4   28.70    1.60
  -4   7  -4   26.50    1.60
  -4   7  -4   29.10    1.50
  -4   7  -4   27.40    1.80
   4  -7   4   27.60    1.90
  -5   7  -4   37.20    1.70
  -5   7  -4   35.10    2.00
  -5   7  -4   35.80    1.80
  -5   7  -4   39.30    1.90
   5  -7   4   34.10    2.20
  -6   7  -4   33.40    1.60
  -6   7  -4   34.30    1.90
  -6   7  -4   33.20    1.80
   6  -7   4   33.10    2.00
   6  -7   4   31.40    2.20
   6  -7   4   33.00    2.00
  -7   7  -4    9.80    1.40
  -7   7  -4   10.20    0.90
  -7   7  -4    9.90    1.10
   7  -7   4   11.40    1.60
  -8   7  -4    3.30    0.80
  -8   7  -4    4.00    0.80
   8  -7   4    4.70    1.30
  -9   7  -4    0.10    0.50
  -9   7  -4    0.50    0.60
   9  -7   4   -0.30    1.00
  12   6  -4   17.90    1.60
  12   6  -4   18.30    1.20
  12   6  -4   16.90    1.60
  11   6  -4    5.60    0.50
  11   6  -4    5.40    1.00
  11   6  -4    6.10    1.00
  11   6  -4    4.30    0.70
  11   6  -4    4.70    0.50
  10   6  -4   -0.10    0.40
  10   6  -4    0.10    0.30
  10   6  -4    0.70    0.50
  10   6  -4    0.10    0.50
  10   6  -4    0.10    0.30
   9   6  -4   30.90    1.20
   9   6  -4   33.70    2.00
   9   6  -4   31.10    1.90
   9   6  -4   32.90    2.00
   9   6  -4   31.60    1.10
   9   6  -4   30.80    1.70
   8   6  -4   54.79    3.50
   8   6  -4   50.39    1.60
   8   6  -4   51.69    1.60
   8   6  -4   54.89    2.30
   8   6  -4   49.20    2.20
   8   6  -4   56.19    2.60
  -8  -6   4   56.59    2.60
   7   6  -4   10.10    0.70
   7   6  -4   10.00    0.70
   7   6  -4    8.40    1.00
   7   6  -4   11.90    1.20
   7   6  -4   11.20    1.20
  -7  -6   4   11.40    1.40
   6   6  -4    2.30    0.50
   6   6  -4    1.80    0.50
   6   6  -4    2.70    0.40
   6   6  -4    2.60    0.70
   6   6  -4    1.50    0.70
  -6  -6   4    2.50    0.80
   5   6  -4    0.70    0.40
   5   6  -4    0.50    0.50
   5   6  -4    0.30    0.50
   5   6  -4    0.70    0.40
  -5  -6   4    1.10    0.50
  -5  -6   4    0.60    0.40
   4   6  -4    7.50    0.70
   4   6  -4    6.20    0.80
   4   6  -4    6.80    1.00
   4   6  -4    9.10    1.10
   4   6  -4    7.10    0.80
  -4  -6   4    4.90    0.80
   3   6  -4   31.80    1.60
   3   6  -4   34.80    1.50
   3   6  -4   32.70    1.40
   3   6  -4   32.60    1.70
  -3  -6   4   29.00    1.60
  -3  -6   4   31.50    1.00
  -3  -6   4   31.30    1.50
  -3  -6   4   32.00    1.00
   2   6  -4   29.50    1.30
   2   6  -4   29.10    1.40
   2   6  -4   29.30    1.40
   2   6  -4   31.70    1.50
  -2  -6   4   28.30    1.10
  -2  -6   4   32.60    1.30
  -2  -6   4   30.10    1.50
  -2  -6   4   32.60    1.40
   1   6  -4   98.89    2.90
   1   6  -4  101.89    3.20
   1   6  -4   98.09    2.90
   1   6  -4  103.79    3.00
   1   6  -4   98.79    3.00
  -1  -6   4   98.89    2.70
  -1  -6   4   96.69    2.90
  -1  -6   4   93.19    3.00
  -1  -6   4  100.69    2.90
   0   6  -4   15.60    1.00
   0   6  -4   16.20    1.00
   0   6  -4   18.70    1.20
   0   6  -4   16.40    1.00
   0   6  -4   17.70    1.20
   0  -6   4   17.20    1.10
   0  -6   4   16.80    1.00
   0  -6   4   16.60    1.10
   0  -6   4   15.80    1.10
  -1   6  -4  108.39    3.00
  -1   6  -4  106.19    3.20
  -1   6  -4  106.49    3.40
  -1   6  -4  107.39    3.30
  -1   6  -4  104.49    3.20
  -1   6  -4  120.79    4.00
   1  -6   4  106.39    3.20
   1  -6   4  108.29    3.10
   1  -6   4  108.19    3.30
  -2   6  -4    5.40    0.80
  -2   6  -4    4.80    0.70
  -2   6  -4    4.10    0.80
  -2   6  -4    4.40    0.70
  -2   6  -4    6.70    0.90
   2  -6   4    6.30    0.80
   2  -6   4    4.60    0.90
   2  -6   4    5.10    0.70
   2  -6   4    5.00    0.60
  -3   6  -4    3.70    0.60
  -3   6  -4    3.60    0.70
  -3   6  -4    2.70    0.60
  -3   6  -4    3.50    0.80
   3  -6   4    3.30    0.80
   3  -6   4    4.40    0.60
   3  -6   4    4.00    0.70
   3  -6   4    3.00    0.60
  -4   6  -4   29.90    1.60
  -4   6  -4   31.30    1.40
  -4   6  -4   30.90    1.60
  -4   6  -4   30.10    1.80
   4  -6   4   33.00    1.70
   4  -6   4   32.30    1.70
   4  -6   4   30.60    1.90
  -5   6  -4    1.70    0.60
  -5   6  -4    1.30    0.50
  -5   6  -4    1.30    0.60
  -5   6  -4    1.20    0.70
   5  -6   4    1.30    0.60
   5  -6   4    0.70    0.60
   5  -6   4    0.50    0.80
  -6   6  -4   44.30    1.70
  -6   6  -4   42.70    2.00
  -6   6  -4   41.00    2.10
  -6   6  -4   40.00    1.90
   6  -6   4   40.50    2.10
   6  -6   4   40.40    2.10
   6  -6   4   41.70    2.40
  -7   6  -4   93.59    3.10
  -7   6  -4   89.69    3.10
  -7   6  -4   86.59    3.20
  -7   6  -4   87.39    2.50
   7  -6   4   87.29    3.60
   7  -6   4   95.49    3.40
   7  -6   4   89.19    3.30
  -8   6  -4   96.59    3.20
  -8   6  -4   96.49    3.20
  -8   6  -4   94.29    3.30
   8  -6   4   94.69    3.90
  -9   6  -4    9.70    1.10
  -9   6  -4    6.50    0.90
  -9   6  -4    7.40    1.00
   9  -6   4    7.20    1.40
 -10   6  -4    0.50    0.50
 -10   6  -4   -1.00    0.40
 -10   6  -4    1.40    0.60
  10  -6   4   -0.10    0.90
  12   5  -4   39.20    1.80
  12   5  -4   44.70    2.40
  12   5  -4   49.00    2.60
  11   5  -4    3.10    0.60
  11   5  -4    2.80    0.40
  11   5  -4    2.90    0.80
  11   5  -4    2.40    0.80
  11   5  -4    2.70    0.50
  10   5  -4    0.00    0.50
  10   5  -4    0.90    0.60
  10   5  -4    0.60    0.30
  10   5  -4    0.30    0.30
  10   5  -4    0.40    0.60
  10   5  -4    1.00    0.50
   9   5  -4    2.10    0.40
   9   5  -4    1.10    0.60
   9   5  -4    2.30    0.70
   9   5  -4    2.00    0.80
   9   5  -4    1.90    0.40
   9   5  -4    1.40    0.60
   8   5  -4   -0.30    0.40
   8   5  -4    0.30    0.50
   8   5  -4    0.00    0.30
   8   5  -4   -0.20    0.30
   8   5  -4    1.30    0.60
   8   5  -4    0.40    0.50
  -8  -5   4   -0.70    0.50
   7   5  -4    3.10    0.40
   7   5  -4    4.00    0.70
   7   5  -4    3.70    0.50
   7   5  -4    3.30    0.80
   7   5  -4    4.20    0.90
  -7  -5   4    3.40    0.80
   6   5  -4  475.75   10.30
   6   5  -4  491.65   11.40
   6   5  -4  480.95   11.00
   6   5  -4  485.15   11.30
   6   5  -4  487.35   10.20
  -6  -5   4  468.95   11.30
   5   5  -4    5.70    0.90
   5   5  -4    5.80    0.60
   5   5  -4    5.00    0.50
   5   5  -4    4.40    0.70
   5   5  -4    5.40    0.90
  -5  -5   4    4.10    0.80
   4   5  -4  138.79    4.00
   4   5  -4  139.89    3.50
   4   5  -4  142.59    3.40
   4   5  -4  136.19    3.80
   4   5  -4  135.19    4.10
  -4  -5   4  139.19    4.10
  -4  -5   4  140.49    3.80
   3   5  -4  287.07    7.30
   3   5  -4  283.17    6.90
   3   5  -4  300.27    6.60
   3   5  -4  292.07    7.10
   3   5  -4  295.37    6.70
  -3  -5   4  301.67    6.20
  -3  -5   4  295.37    6.10
  -3  -5   4  308.87    7.00
   2   5  -4  166.68    4.10
   2   5  -4  176.58    4.50
   2   5  -4  164.28    4.20
   2   5  -4  165.98    4.30
   2   5  -4  163.18    4.60
  -2  -5   4  163.18    4.40
  -2  -5   4  171.48    3.90
  -2  -5   4  172.38    4.00
  -2  -5   4  169.98    4.30
   1   5  -4   20.90    1.20
   1   5  -4   21.20    1.10
   1   5  -4   21.10    1.50
  -1  -5   4   22.40    1.00
  -1  -5   4   19.40    1.10
  -1  -5   4   21.20    1.20
  -1  -5   4   22.90    1.10
   0   5  -4   44.30    1.60
   0   5  -4   44.10    1.80
   0   5  -4   41.40    1.60
   0   5  -4   41.80    1.70
   0   5  -4   42.90    1.60
   0  -5   4   44.70    1.70
   0  -5   4   49.10    2.10
   0  -5   4   44.80    1.70
  -1   5  -4    0.50    0.30
  -1   5  -4    0.90    0.50
  -1   5  -4    0.30    0.40
  -1   5  -4    0.60    0.30
  -1   5  -4    0.70    0.40
  -1   5  -4    0.60    0.40
   1  -5   4    0.90    0.40
   1  -5   4    1.40    0.50
   1  -5   4    0.80    0.40
   1  -5   4   -0.20    0.30
  -2   5  -4  322.27    7.60
  -2   5  -4  309.87    7.40
  -2   5  -4  320.67    7.50
  -2   5  -4  315.37    7.50
  -2   5  -4  326.77    7.50
   2  -5   4  317.77    7.60
   2  -5   4  320.87    7.10
   2  -5   4  324.37    7.50
  -3   5  -4    0.40    0.40
  -3   5  -4    0.90    0.40
  -3   5  -4    1.10    0.40
  -3   5  -4    1.00    0.50
   3  -5   4    0.40    0.40
   3  -5   4    1.30    0.60
   3  -5   4    1.30    0.30
   3  -5   4    0.90    0.40
  -4   5  -4    6.80    0.70
  -4   5  -4    7.20    0.90
  -4   5  -4    8.30    1.00
  -4   5  -4    8.40    0.90
   4  -5   4    5.20    0.80
   4  -5   4    4.50    0.90
   4  -5   4    7.00    0.50
   4  -5   4    5.40    0.70
  -5   5  -4   24.90    1.60
  -5   5  -4   25.70    1.10
  -5   5  -4   25.40    1.40
  -5   5  -4   22.40    1.50
   5  -5   4   22.30    1.60
   5  -5   4   24.50    1.50
   5  -5   4   23.70    1.40
  -6   5  -4   -0.30    0.50
  -6   5  -4   -0.10    0.50
  -6   5  -4    0.30    0.30
  -6   5  -4   -0.50    0.50
   6  -5   4   -0.50    0.40
   6  -5   4    0.40    0.50
   6  -5   4   -0.70    0.60
  -7   5  -4  235.58    6.00
  -7   5  -4  236.78    5.90
  -7   5  -4  226.18    6.10
   7  -5   4  229.28    6.20
   7  -5   4  241.38    6.60
   7  -5   4  237.08    6.30
  -8   5  -4   20.60    1.30
  -8   5  -4   18.70    1.30
  -8   5  -4   20.10    1.40
   8  -5   4   17.60    1.50
   8  -5   4   16.00    1.80
   8  -5   4   18.50    1.50
  -9   5  -4   10.70    1.10
  -9   5  -4   11.40    1.10
  -9   5  -4   11.20    1.00
   9  -5   4   13.20    1.70
 -10   5  -4    8.30    0.90
 -10   5  -4    7.10    0.80
 -10   5  -4    8.50    0.90
  10  -5   4    5.20    1.30
 -11   5  -4    1.00    0.30
  11  -5   4    0.00    0.90
  12   4  -4    1.30    0.70
  12   4  -4    2.30    0.70
  12   4  -4    0.50    0.40
  11   4  -4    3.60    0.60
  11   4  -4    2.10    0.80
  11   4  -4    3.00    0.90
  11   4  -4    4.70    0.50
  10   4  -4   52.39    1.70
  10   4  -4   49.99    2.50
  10   4  -4   52.39    1.70
  10   4  -4   53.59    2.50
  10   4  -4   54.29    2.60
   9   4  -4   65.19    1.90
   9   4  -4   65.99    1.90
   9   4  -4   68.39    2.90
   9   4  -4   66.19    2.10
   9   4  -4   63.59    2.70
   8   4  -4    8.00    0.60
   8   4  -4    9.30    0.60
   8   4  -4    8.80    0.80
   8   4  -4    9.40    1.20
   8   4  -4    9.60    1.20
  -8  -4   4    7.50    1.00
   7   4  -4   64.59    2.20
   7   4  -4   64.79    2.50
   7   4  -4   64.39    1.80
   7   4  -4   65.59    1.80
   7   4  -4   66.59    2.60
  -7  -4   4   65.39    2.60
   6   4  -4  587.34   12.40
   6   4  -4  597.34   13.30
   6   4  -4  584.04   13.20
   6   4  -4  594.44   12.30
  -6  -4   4  586.44   13.40
   5   4  -4  167.88    4.60
   5   4  -4  174.08    4.00
   5   4  -4  175.28    3.90
   5   4  -4  170.28    4.70
  -5  -4   4  172.58    4.70
   4   4  -4    2.10    0.40
   4   4  -4    1.80    0.50
   4   4  -4    1.90    0.30
   4   4  -4    2.10    0.50
  -4  -4   4    2.40    0.60
   3   4  -4  242.38    5.80
   3   4  -4  228.58    5.40
   3   4  -4  226.08    5.60
   3   4  -4  235.68    5.30
  -3  -4   4  245.18    5.70
   2   4  -4   30.60    1.40
   2   4  -4   28.60    1.30
   2   4  -4   28.20    1.20
   2   4  -4   29.20    1.10
  -2  -4   4   26.60    1.20
  -2  -4   4   31.30    1.10
  -2  -4   4   28.90    1.00
   1   4  -4  563.84   12.20
   1   4  -4  531.95   12.00
   1   4  -4  550.94   11.90
  -1  -4   4  584.64   12.00
  -1  -4   4  551.84   12.60
  -1  -4   4  576.34   11.80
  -1  -4   4  572.94   12.10
   0   4  -4  674.23   14.50
   0   4  -4  703.03   14.50
   0   4  -4  656.93   14.60
   0   4  -4  697.93   14.80
   0  -4   4  700.83   14.60
   0  -4   4  714.93   14.50
   0  -4   4  678.73   14.50
   0  -4   4  654.33   14.50
  -1   4  -4  561.64   12.20
  -1   4  -4  559.94   12.20
  -1   4  -4  575.14   12.20
  -1   4  -4  530.25   12.00
  -1   4  -4  546.55   12.00
   1  -4   4  565.04   12.10
   1  -4   4  559.04   12.00
   1  -4   4  565.74   12.00
   1  -4   4  579.14   12.70
  -2   4  -4   34.20    1.50
  -2   4  -4   33.80    1.40
  -2   4  -4   36.00    1.50
  -2   4  -4   35.40    1.40
   2  -4   4   34.60    1.60
   2  -4   4   37.00    1.40
   2  -4   4   33.90    1.20
   2  -4   4   33.50    1.40
  -3   4  -4  155.28    4.10
  -3   4  -4  161.58    4.10
  -3   4  -4  161.68    4.30
  -3   4  -4  162.58    4.20
  -3   4  -4  167.28    4.00
   3  -4   4  165.88    3.80
   3  -4   4  160.38    4.20
   3  -4   4  150.68    4.30
   3  -4   4  152.48    4.10
  -4   4  -4    0.80    0.50
  -4   4  -4    0.70    0.40
  -4   4  -4    0.80    0.40
  -4   4  -4    0.90    0.30
   4  -4   4    0.60    0.60
   4  -4   4    1.20    0.30
   4  -4   4    1.40    0.60
  -5   4  -4   10.40    1.10
  -5   4  -4   13.00    1.00
  -5   4  -4   12.60    1.00
  -5   4  -4   12.30    0.70
   5  -4   4   10.90    1.00
   5  -4   4    9.50    1.10
   5  -4   4   10.80    1.00
  -6   4  -4    8.10    0.90
  -6   4  -4    8.40    0.90
  -6   4  -4    8.00    0.60
   6  -4   4    9.50    1.00
   6  -4   4    7.90    1.10
   6  -4   4   10.80    1.10
  -7   4  -4   30.80    2.00
  -7   4  -4   35.20    1.90
  -7   4  -4   33.20    1.50
   7  -4   4   33.40    2.00
   7  -4   4   32.20    1.70
   7  -4   4   33.80    1.80
  -8   4  -4    0.90    0.50
  -8   4  -4    1.90    0.50
   8  -4   4    0.10    0.40
   8  -4   4    1.10    0.50
   8  -4   4    2.10    0.80
  -9   4  -4    6.90    0.90
  -9   4  -4    6.00    0.80
  -9   4  -4    7.50    0.90
   9  -4   4    7.50    1.30
   9  -4   4    7.20    1.10
   9  -4   4    4.40    0.90
 -10   4  -4   49.90    2.00
 -10   4  -4   53.99    1.70
  10  -4   4   52.99    2.80
 -11   4  -4    3.70    0.70
  11  -4   4    3.60    1.10
  12   3  -4    0.80    0.50
  12   3  -4    5.30    1.80
  12   3  -4    2.20    0.70
  11   3  -4   33.30    2.20
  11   3  -4   32.10    1.50
  11   3  -4   31.30    1.90
  11   3  -4   34.00    1.40
  10   3  -4   50.49    1.80
  10   3  -4   46.30    2.30
  10   3  -4   46.70    1.70
  10   3  -4   43.60    2.40
   9   3  -4    1.60    0.40
   9   3  -4    2.30    0.50
   9   3  -4    2.00    0.40
   9   3  -4    2.20    0.80
   9   3  -4    1.70    0.70
   8   3  -4  171.68    4.10
   8   3  -4  171.08    4.20
   8   3  -4  180.38    5.10
   8   3  -4  174.28    4.90
   8   3  -4  171.48    4.10
  -8  -3   4  168.98    4.90
   7   3  -4    2.00    0.40
   7   3  -4    2.30    0.70
   7   3  -4    1.60    0.40
   7   3  -4    1.70    0.60
   7   3  -4    2.10    0.40
  -7  -3   4    1.30    0.60
   6   3  -4  342.17    8.10
   6   3  -4  344.27    7.30
   6   3  -4  338.67    7.30
   6   3  -4  330.77    8.10
  -6  -3   4  336.07    8.10
   5   3  -4   22.90    0.90
   5   3  -4   20.20    1.20
   5   3  -4   22.40    0.90
   5   3  -4   22.70    1.30
  -5  -3   4   22.30    1.30
   4   3  -4   35.50    1.10
   4   3  -4   33.40    1.50
   4   3  -4   34.80    1.60
   4   3  -4   37.10    1.20
  -4  -3   4   35.40    1.60
   3   3  -4    7.50    0.50
   3   3  -4    7.40    0.60
   3   3  -4    8.60    0.80
  -3  -3   4    8.60    0.80
  -3  -3   4    8.10    0.70
   2   3  -4    5.00    0.60
   2   3  -4    5.50    0.60
   2   3  -4    4.10    0.50
   2   3  -4    6.50    0.50
  -2  -3   4    6.60    0.70
  -2  -3   4    6.70    0.90
  -2  -3   4    5.90    0.40
  -2  -3   4    5.50    0.50
   1   3  -4  318.77    7.00
   1   3  -4  302.27    6.90
   1   3  -4  301.87    6.80
   1   3  -4  298.37    6.70
  -1  -3   4  300.17    6.90
  -1  -3   4  318.57    6.60
  -1  -3   4  313.97    6.70
  -1  -3   4  294.57    6.90
   0   3  -4  124.99    3.30
   0   3  -4  129.59    3.20
   0   3  -4  127.49    3.30
   0   3  -4  125.79    3.30
   0  -3   4  129.79    3.30
   0  -3   4  133.69    3.20
   0  -3   4  136.29    3.30
  -1   3  -4  131.09    3.40
  -1   3  -4  127.89    3.40
  -1   3  -4  141.89    3.50
  -1   3  -4  134.49    3.50
   1  -3   4  139.09    3.40
   1  -3   4  132.09    3.40
   1  -3   4  138.29    3.50
   1  -3   4  134.99    3.30
  -2   3  -4  641.04   13.80
  -2   3  -4  610.04   13.70
  -2   3  -4  663.23   13.80
  -2   3  -4  683.03   13.70
   2  -3   4  620.64   13.70
   2  -3   4  659.63   13.70
   2  -3   4  644.94   13.50
   2  -3   4  637.64   13.90
  -3   3  -4  115.59    3.10
  -3   3  -4  115.79    3.10
  -3   3  -4  115.29    3.20
  -3   3  -4  118.59    2.90
  -3   3  -4  120.79    3.20
   3  -3   4  116.59    3.10
   3  -3   4  119.39    2.80
   3  -3   4  111.69    3.30
   3  -3   4  112.59    3.10
  -4   3  -4   14.80    1.00
  -4   3  -4   13.90    0.70
  -4   3  -4   15.10    0.90
  -4   3  -4   14.50    1.00
   4  -3   4   14.40    1.00
   4  -3   4   13.40    0.90
   4  -3   4   13.60    0.90
   4  -3   4   14.30    0.70
   4  -3   4   15.30    1.10
  -5   3  -4   28.60    0.90
  -5   3  -4   28.20    1.30
  -5   3  -4   29.00    1.30
  -5   3  -4   26.40    1.30
   5  -3   4   29.50    0.90
   5  -3   4   27.80    1.50
   5  -3   4   26.30    1.30
   5  -3   4   27.40    1.40
   5  -3   4   26.70    1.30
  -6   3  -4  128.29    3.50
  -6   3  -4  126.39    3.40
  -6   3  -4  127.99    3.60
   6  -3   4  131.59    3.70
   6  -3   4  123.29    3.80
   6  -3   4  125.89    3.70
  -7   3  -4    8.10    0.90
  -7   3  -4    7.90    0.80
  -7   3  -4    9.00    0.90
   7  -3   4    8.20    1.10
   7  -3   4    5.70    0.80
   7  -3   4    8.20    1.00
  -8   3  -4  107.29    3.20
  -8   3  -4  108.19    3.00
  -8   3  -4  105.89    3.10
   8  -3   4  106.89    3.40
   8  -3   4  111.49    3.70
   8  -3   4  100.39    3.40
  -9   3  -4   24.00    1.10
  -9   3  -4   25.90    1.40
   9  -3   4   25.00    1.60
   9  -3   4   27.40    1.90
 -10   3  -4   58.59    2.20
  10  -3   4   64.29    2.90
  10  -3   4   59.59    2.60
 -11   3  -4   36.10    1.60
  11  -3   4   36.20    2.30
  12  -3   4    9.60    1.40
  11   2  -4    1.40    0.60
  11   2  -4    0.70    0.80
  11   2  -4    1.60    0.50
  11   2  -4    0.50    0.50
  10   2  -4    6.60    1.20
  10   2  -4    8.80    0.80
  10   2  -4    6.00    0.80
  10   2  -4    7.60    1.00
   9   2  -4   75.79    2.40
   9   2  -4   80.09    3.20
   9   2  -4   71.09    2.30
   8   2  -4   17.10    1.00
   8   2  -4   16.50    1.40
  -8  -2   4   14.80    1.20
   7   2  -4    0.10    0.30
   7   2  -4   -0.20    0.30
   7   2  -4    0.30    0.50
   7   2  -4    0.70    0.50
   7   2  -4    0.20    0.30
  -7  -2   4    0.30    0.40
   6   2  -4   13.10    1.20
   6   2  -4   14.70    0.80
   6   2  -4   14.70    0.80
   6   2  -4   15.80    1.20
   6   2  -4   15.20    0.80
  -6  -2   4   16.40    1.20
   5   2  -4    1.70    0.40
   5   2  -4    1.70    0.40
   5   2  -4    2.30    0.60
   5   2  -4    2.30    0.60
  -5  -2   4    1.10    0.40
   4   2  -4    3.70    0.60
   4   2  -4    3.80    0.40
   4   2  -4    3.00    0.40
   4   2  -4    3.40    0.60
  -4  -2   4    2.90    0.60
   3   2  -4  363.06    8.30
   3   2  -4  370.16    8.30
   3   2  -4  380.96    7.90
   3   2  -4  364.26    7.90
   2   2  -4    0.10    0.30
   2   2  -4   -0.10    0.20
   2   2  -4    0.10    0.30
   2   2  -4   -0.10    0.20
  -2  -2   4    0.30    0.30
  -2  -2   4    0.20    0.20
  -2  -2   4    0.00    0.20
  -2  -2   4    0.10    0.30
   1   2  -4  242.18    5.50
   1   2  -4  237.48    5.40
   1   2  -4  238.28    5.50
   1   2  -4  243.48    5.40
  -1  -2   4  242.08    5.50
  -1  -2   4  250.37    5.40
  -1  -2   4  248.58    5.30
  -1  -2   4  243.18    5.60
   0   2  -4 1413.46  108.79
  -1   2  -4  338.77    7.40
  -1   2  -4  330.47    7.50
  -1   2  -4  336.47    7.40
  -1   2  -4  330.07    7.40
   1  -2   4  349.37    7.40
   1  -2   4  345.87    7.40
   1  -2   4  323.67    7.30
   1  -2   4  347.37    7.50
  -2   2  -4   77.79    2.10
  -2   2  -4   77.49    2.20
  -2   2  -4   77.59    2.20
   2  -2   4   76.69    2.20
   2  -2   4   73.49    2.20
   2  -2   4   76.99    2.10
  -3   2  -4    5.00    0.60
  -3   2  -4    6.10    0.70
  -3   2  -4    5.50    0.60
  -3   2  -4    4.40    0.50
  -3   2  -4    5.10    0.40
   3  -2   4    3.10    0.50
   3  -2   4    3.80    0.50
   3  -2   4    5.00    0.60
   3  -2   4    5.30    0.70
  -4   2  -4   51.39    1.30
  -4   2  -4   51.79    1.80
  -4   2  -4   51.19    1.80
  -4   2  -4   52.29    1.70
   4  -2   4   49.60    1.80
   4  -2   4   50.19    1.70
   4  -2   4   46.10    1.70
   4  -2   4   45.00    2.10
  -5   2  -4   14.00    0.90
  -5   2  -4   14.90    0.90
   5  -2   4   14.40    1.10
   5  -2   4   14.10    0.90
   5  -2   4   14.90    1.00
   5  -2   4   14.70    0.90
  -6   2  -4  105.79    3.10
  -6   2  -4  108.69    3.00
  -6   2  -4  118.59    3.20
   6  -2   4  108.49    3.30
   6  -2   4  107.19    3.10
   6  -2   4  106.79    3.10
   6  -2   4  108.49    3.10
  -7   2  -4    0.40    0.40
  -7   2  -4    0.40    0.40
   7  -2   4   -0.20    0.40
   7  -2   4    0.10    0.40
   7  -2   4    0.20    0.30
   7  -2   4    0.30    0.60
   7  -2   4   -0.50    0.40
  -8   2  -4   26.40    1.20
  -8   2  -4   26.70    1.10
  -8   2  -4   25.50    1.40
   8  -2   4   28.00    1.50
   8  -2   4   27.60    1.50
   8  -2   4   24.80    1.70
   8  -2   4   26.40    1.50
  -9   2  -4    5.50    0.50
  -9   2  -4    6.50    0.80
  -9   2  -4    6.10    0.50
   9  -2   4    5.60    0.90
   9  -2   4    5.60    0.90
   9  -2   4    6.80    0.90
   9  -2   4    7.10    1.10
 -10   2  -4   10.50    1.00
  10  -2   4   11.40    1.20
  10  -2   4   11.60    1.40
  10  -2   4    9.20    1.10
 -11   2  -4   60.69    2.20
  11  -2   4   60.19    2.80
  11  -2   4   62.49    2.60
  12  -2   4    8.70    1.30
  11   1  -4    3.40    0.60
  11   1  -4    1.60    0.80
  11   1  -4    0.80    0.60
  11   1  -4    1.70    0.60
  10   1  -4   17.60    1.40
  10   1  -4   18.10    1.20
  10   1  -4   18.10    1.30
  10   1  -4   18.00    1.70
   9   1  -4   26.70    1.40
   9   1  -4   26.10    1.60
   9   1  -4   28.00    1.40
   8   1  -4    4.60    0.70
   8   1  -4    4.20    0.70
  -8  -1   4    5.10    0.80
   7   1  -4    8.20    1.00
   7   1  -4    8.30    0.80
  -7  -1   4    9.70    1.00
   6   1  -4   53.49    1.70
   6   1  -4   52.09    1.70
  -6  -1   4   53.09    2.00
   5   1  -4   39.30    1.10
   5   1  -4   41.00    1.40
   5   1  -4   37.60    1.30
   5   1  -4   38.30    1.10
  -5  -1   4   38.80    1.60
   4   1  -4  237.28    5.10
   4   1  -4  230.48    5.20
   4   1  -4  234.18    5.20
  -4  -1   4  232.48    5.90
   3   1  -4  425.36    9.20
   3   1  -4  448.26    9.10
   3   1  -4  418.96    9.20
  -3  -1   4  442.56    8.90
  -3  -1   4  428.96    9.50
  -3  -1   4  441.36    8.90
   2   1  -4   73.59    2.00
   2   1  -4   72.39    1.90
   2   1  -4   74.99    1.90
  -2  -1   4   78.09    1.90
  -2  -1   4   71.49    2.20
  -2  -1   4   78.29    1.90
   1   1  -4    6.80    0.60
   1   1  -4    7.40    0.50
   1   1  -4    6.30    0.60
   1   1  -4    7.80    0.50
  -1  -1   4    7.90    0.60
  -1  -1   4    8.20    0.60
  -1  -1   4    7.50    0.60
  -1  -1   4    7.70    0.50
   0   1  -4  162.38    3.80
   0   1  -4  161.18    3.70
   0   1  -4  159.28    3.80
   0   1  -4  166.38    3.80
   0  -1   4  160.78    3.70
   0  -1   4  160.78    3.80
   0  -1   4  159.98    3.80
   0  -1   4  166.68    3.80
  -1   1  -4 1016.10   91.49
   1  -1   4 1153.58   99.19
  -2   1  -4   90.99    2.40
  -2   1  -4   90.39    2.30
  -2   1  -4   94.69    2.40
  -2   1  -4   92.99    2.50
   2  -1   4   93.99    2.50
   2  -1   4   94.29    2.40
   2  -1   4   92.09    2.50
   2  -1   4   90.19    2.30
  -3   1  -4   46.40    1.40
  -3   1  -4   47.40    1.50
  -3   1  -4   46.80    1.50
  -3   1  -4   46.90    1.50
   3  -1   4   45.30    1.60
   3  -1   4   45.70    1.50
   3  -1   4   44.80    1.40
   3  -1   4   45.80    1.60
  -4   1  -4   44.20    1.50
  -4   1  -4   45.30    1.50
  -4   1  -4   43.70    1.40
  -4   1  -4   44.70    1.00
   4  -1   4   38.20    1.40
   4  -1   4   39.50    1.40
   4  -1   4   42.40    1.60
   4  -1   4   44.50    1.60
  -5   1  -4   94.09    2.50
  -5   1  -4   90.99    2.60
  -5   1  -4   91.09    2.40
   5  -1   4   87.19    2.50
   5  -1   4   91.69    2.70
   5  -1   4   90.39    2.50
   5  -1   4   88.49    2.60
  -6   1  -4    9.30    0.70
  -6   1  -4   10.20    0.80
  -6   1  -4   10.00    0.60
   6  -1   4    8.70    0.80
   6  -1   4    9.00    0.90
   6  -1   4    9.60    0.80
   6  -1   4    9.10    0.80
  -7   1  -4   16.00    0.80
  -7   1  -4   17.10    1.10
  -7   1  -4   15.40    0.80
   7  -1   4   15.70    1.10
   7  -1   4   15.70    1.00
   7  -1   4   13.70    1.10
   7  -1   4   14.90    1.00
  -8   1  -4   13.30    0.60
  -8   1  -4   13.10    0.60
  -8   1  -4   12.70    1.00
   8  -1   4   14.50    1.20
   8  -1   4   14.20    1.10
   8  -1   4   13.10    0.80
   8  -1   4   14.60    1.10
   8  -1   4   14.60    1.10
  -9   1  -4   19.40    1.20
   9  -1   4   16.90    1.40
   9  -1   4   19.00    0.90
   9  -1   4   17.60    1.30
   9  -1   4   17.90    1.20
   9  -1   4   19.40    1.30
 -10   1  -4   45.70    1.90
  10  -1   4   46.20    2.10
  10  -1   4   45.30    2.20
  10  -1   4   47.80    2.00
  10  -1   4   45.30    2.00
  10  -1   4   45.20    1.50
 -11   1  -4    0.20    0.40
  11  -1   4   -0.70    0.50
  11  -1   4    0.00    0.50
  11  -1   4    0.00    0.40
  11  -1   4    0.50    0.70
  12  -1   4    4.30    1.00
  12  -1   4    4.00    0.80
  13  -1   4   11.20    1.40
  11   0  -4   16.60    1.20
  11   0  -4   13.50    1.50
  10   0  -4   24.90    1.40
  10   0  -4   21.60    1.60
  10   0  -4   20.70    1.50
   9   0  -4   45.40    2.00
   9   0  -4   43.20    2.10
   9   0  -4   44.10    1.90
   8   0  -4  345.97    8.40
   8   0  -4  359.46    8.20
   8   0  -4  353.86    8.10
  -8   0   4  345.27    8.20
   7   0  -4   49.00    2.10
   7   0  -4   48.00    1.80
   7   0  -4   48.50    1.90
  -7   0   4   48.70    1.90
   6   0  -4   11.60    0.90
   6   0  -4   13.80    0.90
  -6   0   4   13.10    1.00
   5   0  -4   23.10    1.10
   5   0  -4   21.20    1.00
  -5   0   4   22.20    1.20
   4   0  -4   40.00    1.40
   4   0  -4   39.40    1.40
  -4   0   4   41.00    1.50
  -4   0   4   40.40    1.00
  -4   0   4   40.30    1.00
   3   0  -4  601.74   12.80
   3   0  -4  602.94   12.80
   3   0  -4  625.64   12.50
  -3   0   4  614.34   12.60
  -3   0   4  607.54   13.00
  -3   0   4  613.54   12.60
   2   0  -4 1098.79   23.20
   2   0  -4 1168.48   23.00
   1   0  -4   91.09    2.40
   1   0  -4   94.39    2.50
   1   0  -4   95.69    2.20
   1   0  -4   90.89    2.30
  -1   0   4   94.59    2.20
  -1   0   4   94.39    2.40
  -1   0   4   94.09    2.30
   0   0  -4  351.16    7.80
   0   0  -4  363.76    7.80
   0   0  -4  378.16    7.90
   0   0   4  373.76    7.90
   0   0   4  378.36    7.80
   0   0   4  357.86    7.90
   0   0   4  367.66    7.80
  -1   0  -4   22.90    0.80
  -1   0  -4   22.50    0.90
  -1   0  -4   22.40    0.90
  -1   0  -4   21.90    0.90
   1   0   4   22.60    0.80
   1   0   4   24.30    0.90
  -2   0  -4  143.79    3.20
  -2   0  -4  146.89    3.40
  -2   0  -4  142.79    3.40
  -2   0  -4  140.09    3.40
   2   0   4  137.89    3.20
   2   0   4  145.49    3.40
   2   0   4  141.39    3.40
  -3   0  -4  443.66    9.50
  -3   0  -4  444.56    9.10
  -3   0  -4  441.66    9.20
  -3   0  -4  453.55    9.30
  -3   0  -4  458.05    9.40
   3   0   4  431.56    9.20
   3   0   4  425.86    9.40
   3   0   4  421.66    9.30
   3   0   4  428.66    9.40
  -4   0  -4  274.47    6.10
  -4   0  -4  276.97    5.50
  -4   0  -4  273.27    5.90
  -4   0  -4  273.87    5.90
   4   0   4  258.87    6.10
   4   0   4  263.67    6.10
   4   0   4  260.27    5.90
   4   0   4  263.07    5.90
  -5   0  -4  285.77    6.10
  -5   0  -4  276.57    6.00
  -5   0  -4  282.97    6.40
   5   0   4  273.87    6.20
   5   0   4  274.77    6.40
   5   0   4  276.37    6.40
   5   0   4  280.07    6.20
  -6   0  -4   27.80    1.00
  -6   0  -4   27.70    0.90
  -6   0  -4   29.10    1.30
   6   0   4   27.70    1.20
   6   0   4   26.50    1.30
   6   0   4   26.60    1.30
   6   0   4   24.60    1.10
  -7   0  -4  137.99    3.00
  -7   0  -4  135.29    3.70
   7   0   4  135.29    3.70
   7   0   4  134.89    3.60
   7   0   4  133.09    3.70
   7   0   4  137.79    3.50
  -8   0  -4   19.30    1.20
   8   0   4   17.70    1.30
   8   0   4   17.60    1.00
   8   0   4   19.40    1.20
   8   0   4   17.30    1.20
   8   0   4   19.00    1.10
  -9   0  -4   93.99    2.90
   9   0   4   88.69    3.00
   9   0   4   92.29    2.80
   9   0   4   91.49    2.70
   9   0   4   93.19    3.00
   9   0   4   95.09    3.00
 -10   0  -4   14.70    1.10
  10   0   4   11.00    1.10
  10   0   4   11.60    1.00
  10   0   4   13.30    0.90
  10   0   4   18.10    1.40
  10   0   4   11.30    1.10
 -11   0  -4    1.80    0.50
  11   0   4    1.50    0.50
  11   0   4    1.30    0.50
  11   0   4    0.20    0.50
  11   0   4    1.30    0.60
  11   0   4    1.10    0.70
  12   0   4   29.40    1.80
  12   0   4   28.80    1.80
  12   0   4   28.70    1.60
  12   0   4   28.60    2.30
  12   0   4   28.50    1.30
  13   0   4    0.30    0.70
  11  -1  -4   88.39    3.30
  11  -1  -4   80.29    3.60
  10  -1  -4   27.20    1.60
  10  -1  -4   21.80    1.60
[truncated: 863,576 more chars]
